# Supplementary material for: Broad substrate-specific phosphorylation events are associated with the initial stage of plant cell wall recognition in Neurospora crassa
Source: bioRxiv preprint, doi:10.1101/711085, version 1 (2019-07-29)
Supplement: Supplementary Material 1 [file 711085_file06.xlsx]

## Sheet: File description
This file contains the list of proteins present in the Protein-protein network (sheet "Total proteins on PPI").
The classification of protein functions is described on "Protein-Classes" sheet and the total number of classes found at each condition summarized on the "Protein Class_condition" sheet.

## Sheet: Total proteins on PPI
Gene ID	Protein ID Uniprot	Entry name	Protein names	Gene names	Organism	Length	Gene ontology (GO)	Cross-reference (ProteomicsDB)	Cross-reference (PROSITE)	Cross-reference (Pfam)	Cross-reference (SMART)	Cross-reference (PANTHER)	UniParc
NCU00018	U9W4Q2	U9W4Q2_NEUCR	Cell division control protein Cdc48, variant	NCU00018	Neurospora crassa (strain ATCC 24698 / 74-OR23-1A / CBS 708.71 / DSM 1257 / FGSC 987)	824	cytoplasm [GO:0005737]; cytosol [GO:0005829]; mitotic spindle midzone [GO:1990023]; nuclear chromatin [GO:0000790]; nucleus [GO:0005634]; VCP-NPL4-UFD1 AAA ATPase complex [GO:0034098]; ATP binding [GO:0005524]; ATPase activity [GO:0016887]; molecular adaptor activity [GO:0060090]; polyubiquitin modification-dependent protein binding [GO:0031593]; autophagosome maturation [GO:0097352]; cell divisi…		PS00674;	PF00004;PF02933;PF02359;PF09336;	SM00382;SM01072;SM01073;		UPI000018B087
NCU00021	Q7RY84	CLU_NEUCR	Clustered mitochondria protein homolog (Protein TIF31 homolog)	clu1 tif31 NCU00021 NCU20005	Neurospora crassa (strain ATCC 24698 / 74-OR23-1A / CBS 708.71 / DSM 1257 / FGSC 987)	1282	cytoplasm [GO:0005737]; mRNA binding [GO:0003729]; intracellular distribution of mitochondria [GO:0048312]		PS51823;	PF13236;PF15044;PF12807;			UPI000018B08A
NCU00028	U9W4Q7	U9W4Q7_NEUCR	S-(Hydroxymethyl)glutathione dehydrogenase, variant	NCU00028	Neurospora crassa (strain ATCC 24698 / 74-OR23-1A / CBS 708.71 / DSM 1257 / FGSC 987)	333	oxidoreductase activity [GO:0016491]; zinc ion binding [GO:0008270]		PS00059;	PF08240;PF00107;			UPI0003CA8B6E
NCU00028	U9WGL1	U9WGL1_NEUCR	S-(Hydroxymethyl)glutathione dehydrogenase	NCU00028	Neurospora crassa (strain ATCC 24698 / 74-OR23-1A / CBS 708.71 / DSM 1257 / FGSC 987)	364	oxidoreductase activity [GO:0016491]; zinc ion binding [GO:0008270]		PS00059;	PF08240;PF00107;			UPI000018B091
NCU00030	Q7RY75	Q7RY75_NEUCR	Mitochondrial nuclease	NCU00030	Neurospora crassa (strain ATCC 24698 / 74-OR23-1A / CBS 708.71 / DSM 1257 / FGSC 987)	332	mitochondrial inner membrane [GO:0005743]; mitochondrion [GO:0005739]; nucleus [GO:0005634]; endonuclease activity [GO:0004519]; endoribonuclease activity [GO:0004521]; exodeoxyribonuclease activity [GO:0004529]; metal ion binding [GO:0046872]; nucleic acid binding [GO:0003676]; single-stranded DNA endodeoxyribonuclease activity [GO:0000014]; apoptotic DNA fragmentation [GO:0006309]; DNA cataboli…		PS01070;	PF01223;	SM00892;SM00477;	PTHR13966;	UPI000018B093
NCU00032	Q7RY73	Q7RY73_NEUCR	Peroxin 8	pex8 NCU00032	Neurospora crassa (strain ATCC 24698 / 74-OR23-1A / CBS 708.71 / DSM 1257 / FGSC 987)	743							UPI0003CAE4F7
NCU00040	Q7RWT1	EIF3A_NEUCR	Eukaryotic translation initiation factor 3 subunit A (eIF3a) (Eukaryotic translation initiation factor 3 110 kDa subunit homolog) (eIF3 p110) (Translation initiation factor eIF3, p110 subunit homolog)	eif3a tif32 NCU00040 NCU20009	Neurospora crassa (strain ATCC 24698 / 74-OR23-1A / CBS 708.71 / DSM 1257 / FGSC 987)	1059	eukaryotic 43S preinitiation complex [GO:0016282]; eukaryotic 48S preinitiation complex [GO:0033290]; eukaryotic translation initiation factor 3 complex, eIF3e [GO:0071540]; eukaryotic translation initiation factor 3 complex, eIF3m [GO:0071541]; multi-eIF complex [GO:0043614]; mRNA binding [GO:0003729]; translation initiation factor activity [GO:0003743]; formation of cytoplasmic translation init…		PS50250;	PF01399;	SM00088;	PTHR14005;	UPI000018B28C
NCU00041	Q7RWT0	GBG_NEUCR	Guanine nucleotide-binding protein subunit gamma	gng-1 NCU00041	Neurospora crassa (strain ATCC 24698 / 74-OR23-1A / CBS 708.71 / DSM 1257 / FGSC 987)	93	cytoplasm [GO:0005737]; heterotrimeric G-protein complex [GO:0005834]; G protein-coupled receptor signaling pathway [GO:0007186]; pheromone-dependent signal transduction involved in conjugation with cellular fusion [GO:0000750]		PS50058;	PF00631;	SM00224;		UPI000049793B
NCU00043	Q9UW86	PP1_NEUCR	Serine/threonine-protein phosphatase PP1 (EC 3.1.3.16) (Phosphoprotein phosphatase 1)	pph-3 ppp-1 NCU00043	Neurospora crassa (strain ATCC 24698 / 74-OR23-1A / CBS 708.71 / DSM 1257 / FGSC 987)	308	cytoplasm [GO:0005737]; nucleus [GO:0005634]; protein phosphatase type 1 complex [GO:0000164]; metal ion binding [GO:0046872]; protein serine/threonine phosphatase activity [GO:0004722]; chromosome segregation [GO:0007059]; regulation of cell cycle [GO:0051726]; regulation of mitotic cell cycle [GO:0007346]		PS00125;	PF00149;PF16891;	SM00156;	PTHR11668:SF204;	UPI000005CA7D
NCU00045	Q7RWS7	Q7RWS7_NEUCR	PHD finger domain-containing protein	NCU00045	Neurospora crassa (strain ATCC 24698 / 74-OR23-1A / CBS 708.71 / DSM 1257 / FGSC 987)	1261	metal ion binding [GO:0046872]		PS51805;PS01359;PS50016;	PF10513;	SM00249;		UPI000018B291
NCU00046	U9WGL9	U9WGL9_NEUCR	Leucine Rich Repeat domain-containing protein, variant	NCU00046	Neurospora crassa (strain ATCC 24698 / 74-OR23-1A / CBS 708.71 / DSM 1257 / FGSC 987)	856	cytoplasm [GO:0005737]; protein kinase binding [GO:0019901]; structural constituent of cytoskeleton [GO:0005200]		PS51450;	PF13855;			UPI0003CA053E
NCU00050	Q7RWS2	Q7RWS2_NEUCR	Pyruvate dehydrogenase X component	NCU00050	Neurospora crassa (strain ATCC 24698 / 74-OR23-1A / CBS 708.71 / DSM 1257 / FGSC 987)	426	transferase activity, transferring acyl groups [GO:0016746]		PS50968;PS00189;PS51826;	PF00364;PF02817;			UPI00015C3678
NCU00051	Q7RWS1	Q7RWS1_NEUCR	Uncharacterized protein	NCU00051	Neurospora crassa (strain ATCC 24698 / 74-OR23-1A / CBS 708.71 / DSM 1257 / FGSC 987)	366	integral component of membrane [GO:0016021]						UPI000018B297
NCU00057	Q7RW42	Q7RW42_NEUCR	Ubiquinol cytochrome-c reductase assembly protein Cbp3	NCU00057	Neurospora crassa (strain ATCC 24698 / 74-OR23-1A / CBS 708.71 / DSM 1257 / FGSC 987)	368				PF03981;		PTHR12184;	UPI000018B384
NCU00059	Q7RW40	Q7RW40_NEUCR	Uncharacterized protein	NCU00059	Neurospora crassa (strain ATCC 24698 / 74-OR23-1A / CBS 708.71 / DSM 1257 / FGSC 987)	829	rRNA processing [GO:0006364]			PF08167;		PTHR34105;	UPI000018B386
NCU00072	Q7RX78	Q7RX78_NEUCR	Uncharacterized protein	NCU00072	Neurospora crassa (strain ATCC 24698 / 74-OR23-1A / CBS 708.71 / DSM 1257 / FGSC 987)	372	integral component of membrane [GO:0016021]						UPI000018B1F0
NCU00074	Q7RX76	Q7RX76_NEUCR	Uncharacterized protein	NCU00074	Neurospora crassa (strain ATCC 24698 / 74-OR23-1A / CBS 708.71 / DSM 1257 / FGSC 987)	183							UPI000018B1F2
NCU00075	Q7RX75	TIM14_NEUCR	Mitochondrial import inner membrane translocase subunit tim14 (Presequence translocated-associated motor subunit pam18)	tim14 pam18 NCU00075	Neurospora crassa (strain ATCC 24698 / 74-OR23-1A / CBS 708.71 / DSM 1257 / FGSC 987)	105	integral component of membrane [GO:0016021]; PAM complex, Tim23 associated import motor [GO:0001405]; ATPase activator activity [GO:0001671]; protein transporter activity [GO:0008565]; protein import into mitochondrial matrix [GO:0030150]		PS50076;				UPI000018B1F3
NCU00087	Q7RYP0	Q7RYP0_NEUCR	6-phosphogluconolactonase	ppm-1 NCU00087	Neurospora crassa (strain ATCC 24698 / 74-OR23-1A / CBS 708.71 / DSM 1257 / FGSC 987)	261	6-phosphogluconolactonase activity [GO:0017057]; carbohydrate metabolic process [GO:0005975]; pentose-phosphate shunt, oxidative branch [GO:0009051]			PF01182;		PTHR11054;	UPI000018AFE6
NCU00088	Q7RYN9	Q7RYN9_NEUCR	4-nitrophenylphosphatase (PNPPase) (EC 3.1.3.41)	NCU00088	Neurospora crassa (strain ATCC 24698 / 74-OR23-1A / CBS 708.71 / DSM 1257 / FGSC 987)	306	cytoplasm [GO:0005737]; alkaline phosphatase activity [GO:0004035]; phosphatase activity [GO:0016791]; phosphoglycolate phosphatase activity [GO:0008967]; phosphoprotein phosphatase activity [GO:0004721]; dephosphorylation [GO:0016311]; phosphorylated carbohydrate dephosphorylation [GO:0046838]; protein dephosphorylation [GO:0006470]			PF13344;			UPI000018AFE7
NCU00089	U9WGN3	U9WGN3_NEUCR	MYND domain-containing protein, variant 3	NCU00089	Neurospora crassa (strain ATCC 24698 / 74-OR23-1A / CBS 708.71 / DSM 1257 / FGSC 987)	566			PS50280;PS01360;	PF00856;			UPI000018AFE8
NCU00090	Q7RVQ8	PACC_NEUCR	pH-response transcription factor pacc-1	pacc-1 NCU00090	Neurospora crassa (strain ATCC 24698 / 74-OR23-1A / CBS 708.71 / DSM 1257 / FGSC 987)	621	cytoplasm [GO:0005737]; nucleus [GO:0005634]; DNA-binding transcription repressor activity, RNA polymerase II-specific [GO:0001227]; metal ion binding [GO:0046872]; sequence-specific DNA binding [GO:0043565]; positive regulation of transcription by RNA polymerase II [GO:0045944]		PS00028;PS50157;	PF00096;	SM00355;		UPI000058E3EE
NCU00095	Q7RYN3	Q7RYN3_NEUCR	Tetratricopeptide repeat protein 1	NCU00095	Neurospora crassa (strain ATCC 24698 / 74-OR23-1A / CBS 708.71 / DSM 1257 / FGSC 987)	1279	Cdc73/Paf1 complex [GO:0016593]; RNA polymerase II complex binding [GO:0000993]; histone modification [GO:0016570]; regulation of histone H3-K4 methylation [GO:0051569]; regulation of transcription, DNA-templated [GO:0006355]		PS50005;PS50293;	PF13174;PF13181;	SM00028;	PTHR14027;	UPI000018AFEE
NCU00101	Q7RYM7	PBN1_NEUCR	Protein pbn1	pbn1 NCU00101	Neurospora crassa (strain ATCC 24698 / 74-OR23-1A / CBS 708.71 / DSM 1257 / FGSC 987)	501	endoplasmic reticulum membrane [GO:0005789]; glycosylphosphatidylinositol-mannosyltransferase I complex [GO:1990529]; integral component of membrane [GO:0016021]; GPI anchor biosynthetic process [GO:0006506]; mannosylation [GO:0097502]; protein processing [GO:0016485]; ubiquitin-dependent ERAD pathway [GO:0030433]			PF08320;	SM00780;		UPI000018AFF4
NCU00102	Q7RYM6	Q7RYM6_NEUCR	Uncharacterized protein	NCU00102	Neurospora crassa (strain ATCC 24698 / 74-OR23-1A / CBS 708.71 / DSM 1257 / FGSC 987)	372							UPI000018AFF5
NCU00103	Q7RYM5	Q7RYM5_NEUCR	Uncharacterized protein	NCU00103	Neurospora crassa (strain ATCC 24698 / 74-OR23-1A / CBS 708.71 / DSM 1257 / FGSC 987)	292	mitochondrial large ribosomal subunit [GO:0005762]; nucleus [GO:0005634]; recombinase activity [GO:0000150]; single-stranded DNA binding [GO:0003697]; structural constituent of ribosome [GO:0003735]; DNA recombination [GO:0006310]; positive regulation of mitochondrial DNA replication [GO:0090297]; regulation of transcription, DNA-templated [GO:0006355]			PF12829;			UPI000018AFF6
NCU00104	P31540	HSP98_NEUCR	Heat shock protein hsp98 (Protein aggregation-remodeling factor hsp98)	hsp98 NCU00104	Neurospora crassa (strain ATCC 24698 / 74-OR23-1A / CBS 708.71 / DSM 1257 / FGSC 987)	927	cytoplasm [GO:0005737]; nucleus [GO:0005634]; ATP binding [GO:0005524]; ATPase activity [GO:0016887]; misfolded protein binding [GO:0051787]; cellular heat acclimation [GO:0070370]; cellular response to misfolded protein [GO:0071218]; protein metabolic process [GO:0019538]; protein refolding [GO:0042026]; protein unfolding [GO:0043335]		PS00870;PS00871;	PF00004;PF07724;PF02861;PF10431;	SM00382;SM01086;		UPI000018AFF7
NCU00105	Q7RYM3	Q7RYM3_NEUCR	60S ribosome subunit biogenesis protein NIP7	NCU00105	Neurospora crassa (strain ATCC 24698 / 74-OR23-1A / CBS 708.71 / DSM 1257 / FGSC 987)	183	cytoplasm [GO:0005737]; nucleolus [GO:0005730]; preribosome, large subunit precursor [GO:0030687]; RNA binding [GO:0003723]; assembly of large subunit precursor of preribosome [GO:1902626]; maturation of LSU-rRNA from tricistronic rRNA transcript (SSU-rRNA, 5.8S rRNA, LSU-rRNA) [GO:0000463]; ribosomal large subunit biogenesis [GO:0042273]; ribosome assembly [GO:0042255]		PS50890;	PF03657;	SM00359;		UPI00015C3729
NCU00106	Q7RYM2	Q7RYM2_NEUCR	Glutamate 5-kinase	pro-4 NCU00106	Neurospora crassa (strain ATCC 24698 / 74-OR23-1A / CBS 708.71 / DSM 1257 / FGSC 987)	468	cytosol [GO:0005829]; glutamate 5-kinase activity [GO:0004349]; RNA binding [GO:0003723]; proline biosynthetic process [GO:0006561]		PS00902;PS50890;	PF00696;PF01472;	SM00359;		UPI00015C372A
NCU00109	U9W318	U9W318_NEUCR	TipA protein, variant	NCU00109	Neurospora crassa (strain ATCC 24698 / 74-OR23-1A / CBS 708.71 / DSM 1257 / FGSC 987)	322	cytosol [GO:0005829]; signal transduction [GO:0007165]; TOR signaling [GO:0031929]			PF04176;		PTHR21021:SF16;	UPI000018AFFC
NCU00112	Q7RYL6	AMPP1_NEUCR	Probable Xaa-Pro aminopeptidase P (AMPP) (Aminopeptidase P) (EC 3.4.11.9) (Aminoacylproline aminopeptidase) (Prolidase)	ampp NCU00112	Neurospora crassa (strain ATCC 24698 / 74-OR23-1A / CBS 708.71 / DSM 1257 / FGSC 987)	684	metal ion binding [GO:0046872]; metalloaminopeptidase activity [GO:0070006]		PS00491;	PF01321;PF00557;PF16188;			UPI0003CB2791
NCU00114	Q7RYL4	RT10_NEUCR	37S ribosomal protein S10, mitochondrial (Mitochondrial ribosomal small subunit protein 10)	mrp-10 rsm10 NCU00114	Neurospora crassa (strain ATCC 24698 / 74-OR23-1A / CBS 708.71 / DSM 1257 / FGSC 987)	268	mitochondrion [GO:0005739]; ribosome [GO:0005840]; structural constituent of ribosome [GO:0003735]; translation [GO:0006412]			PF00338;	SM01403;	PTHR11700;	UPI00021D6428
NCU00116	U9W323	U9W323_NEUCR	Transcriptional activator	aab-1 NCU00116	Neurospora crassa (strain ATCC 24698 / 74-OR23-1A / CBS 708.71 / DSM 1257 / FGSC 987)	271	CCAAT-binding factor complex [GO:0016602]; nucleus [GO:0005634]; DNA binding [GO:0003677]; DNA-binding transcription activator activity, RNA polymerase II-specific [GO:0001228]; protein heterodimerization activity [GO:0046982]; regulation of carbohydrate metabolic process [GO:0006109]			PF00808;		PTHR10252:SF8;	UPI00015C3762
NCU00121	Q7RYK8	Q7RYK8_NEUCR	CLC channel protein	NCU00121	Neurospora crassa (strain ATCC 24698 / 74-OR23-1A / CBS 708.71 / DSM 1257 / FGSC 987)	920	early endosome [GO:0005769]; endosome [GO:0005768]; Golgi apparatus [GO:0005794]; integral component of plasma membrane [GO:0005887]; plasma membrane [GO:0005886]; chloride ion binding [GO:0031404]; solute:proton antiporter activity [GO:0015299]; voltage-gated chloride channel activity [GO:0005247]			PF00654;			UPI0003CABECF
NCU00122	Q7RYK7	Q7RYK7_NEUCR	Aspartyl aminopeptidase	NCU00122	Neurospora crassa (strain ATCC 24698 / 74-OR23-1A / CBS 708.71 / DSM 1257 / FGSC 987)	537	cytoplasm [GO:0005737]; extracellular region [GO:0005576]; fungal-type vacuole [GO:0000324]; metalloaminopeptidase activity [GO:0070006]; zinc ion binding [GO:0008270]			PF02127;		PTHR28570;	UPI00015C378C
NCU00130	U9W8B8	U9W8B8_NEUCR	Beta-glucosidase, variant	gh1-1 NCU00130	Neurospora crassa (strain ATCC 24698 / 74-OR23-1A / CBS 708.71 / DSM 1257 / FGSC 987)	476	beta-glucosidase activity [GO:0008422]; carbohydrate metabolic process [GO:0005975]		PS00653;	PF00232;		PTHR10353;	UPI000018B26B
NCU00133	Q7RWW0	POB3_NEUCR	FACT complex subunit ctc-1 (Chromatin transcription complex 1) (Facilitates chromatin transcription complex subunit ctc-1)	ctc-1 pob3 NCU00133	Neurospora crassa (strain ATCC 24698 / 74-OR23-1A / CBS 708.71 / DSM 1257 / FGSC 987)	565	alpha DNA polymerase:primase complex [GO:0005658]; FACT complex [GO:0035101]; nuclear chromatin [GO:0000790]; replication fork protection complex [GO:0031298]; DNA binding [GO:0003677]; histone binding [GO:0042393]; nucleosome binding [GO:0031491]; DNA repair [GO:0006281]; DNA replication-independent nucleosome organization [GO:0034724]; DNA-dependent DNA replication [GO:0006261]; positive regula…			PF17292;PF08512;PF03531;	SM01287;		UPI000018B26E
NCU00134	U9WGQ6	U9WGQ6_NEUCR	Exportin-T, variant	NCU00134	Neurospora crassa (strain ATCC 24698 / 74-OR23-1A / CBS 708.71 / DSM 1257 / FGSC 987)	964	nucleus [GO:0005634]; Ran GTPase binding [GO:0008536]; tRNA binding [GO:0000049]; tRNA re-export from nucleus [GO:0071528]			PF08389;		PTHR15952;	UPI0003C9F40A
NCU00137	U9W337	U9W337_NEUCR	SsDNA binding protein	NCU00137	Neurospora crassa (strain ATCC 24698 / 74-OR23-1A / CBS 708.71 / DSM 1257 / FGSC 987)	222	mitochondrial nucleoid [GO:0042645]; mitochondrion [GO:0005739]; nucleoid [GO:0009295]; single-stranded DNA binding [GO:0003697]; mitochondrial DNA replication [GO:0006264]; positive regulation of helicase activity [GO:0051096]		PS50935;	PF00436;		PTHR10302;PTHR10302:SF0;	UPI0003CBCFCA
NCU00137	U9W380	U9W380_NEUCR	SsDNA binding protein, variant	NCU00137	Neurospora crassa (strain ATCC 24698 / 74-OR23-1A / CBS 708.71 / DSM 1257 / FGSC 987)	130	single-stranded DNA binding [GO:0003697]; DNA replication [GO:0006260]			PF00436;		PTHR10302;PTHR10302:SF0;	UPI0003C9F80A
NCU00145	Q7RXR3	CENPA_NEUCR	Histone H3-like centromeric protein hH3v (CENP-A homolog)	hH3v cse4 NCU00145	Neurospora crassa (strain ATCC 24698 / 74-OR23-1A / CBS 708.71 / DSM 1257 / FGSC 987)	155	condensed chromosome kinetochore [GO:0000777]; nucleosome [GO:0000786]; nucleus [GO:0005634]; nucleosomal DNA binding [GO:0031492]; protein heterodimerization activity [GO:0046982]; nucleosome assembly [GO:0006334]		PS00959;	PF00125;	SM00428;	PTHR11426;	UPI000018B139
NCU00147	Q7RXR1	MTND_NEUCR	1,2-dihydroxy-3-keto-5-methylthiopentene dioxygenase (EC 1.13.11.54) (Acireductone dioxygenase (Fe(2+)-requiring)) (ARD) (Fe-ARD)	adi1 NCU00147	Neurospora crassa (strain ATCC 24698 / 74-OR23-1A / CBS 708.71 / DSM 1257 / FGSC 987)	178	cytoplasm [GO:0005737]; nucleus [GO:0005634]; acireductone dioxygenase (Ni2+-requiring) activity [GO:0010308]; acireductone dioxygenase [iron(II)-requiring] activity [GO:0010309]; iron ion binding [GO:0005506]; L-methionine salvage from methylthioadenosine [GO:0019509]; methionine metabolic process [GO:0006555]			PF03079;		PTHR23418;	UPI000018B13B
NCU00150	Q7RXQ8	HIS4_NEUCR	1-(5-phosphoribosyl)-5-[(5-phosphoribosylamino)methylideneamino] imidazole-4-carboxamide isomerase (EC 5.3.1.16) (5-proFAR isomerase) (Phosphoribosylformimino-5-aminoimidazole carboxamide ribotide isomerase)	his-7 his6 NCU00150	Neurospora crassa (strain ATCC 24698 / 74-OR23-1A / CBS 708.71 / DSM 1257 / FGSC 987)	257	cytoplasm [GO:0005737]; 1-(5-phosphoribosyl)-5-[(5-phosphoribosylamino)methylideneamino]imidazole-4-carboxamide isomerase activity [GO:0003949]; histidine biosynthetic process [GO:0000105]; tryptophan biosynthetic process [GO:0000162]			PF00977;			UPI000018B13E
NCU00150	U9W8C9	U9W8C9_NEUCR	Phosphoribosylformimino-5-aminoimidazole carboxamide ribotide isomerase, variant 2	his-7 NCU00150	Neurospora crassa (strain ATCC 24698 / 74-OR23-1A / CBS 708.71 / DSM 1257 / FGSC 987)	237	isomerase activity [GO:0016853]; histidine biosynthetic process [GO:0000105]			PF00977;			UPI0003CA3688
NCU00153	Q7RXQ5	Q7RXQ5_NEUCR	Pyridine nucleotide-disulfide oxidoreductase	ndi-1 NCU00153	Neurospora crassa (strain ATCC 24698 / 74-OR23-1A / CBS 708.71 / DSM 1257 / FGSC 987)	538	oxidoreductase activity [GO:0016491]			PF07992;			UPI0003CB22BA
NCU00158	Q7RXQ0	Q7RXQ0_NEUCR	Potassium channel regulatory factor	NCU00158	Neurospora crassa (strain ATCC 24698 / 74-OR23-1A / CBS 708.71 / DSM 1257 / FGSC 987)	386	U2-type post-spliceosomal complex [GO:0071021]; U4/U6 x U5 tri-snRNP complex [GO:0046540]; U5 snRNP [GO:0005682]; generation of catalytic spliceosome for second transesterification step [GO:0000350]; nuclear retention of unspliced pre-mRNA at the site of transcription [GO:0071048]			PF02840;PF08799;		PTHR13007;	UPI0003CADCAD
NCU00160	Q7RXP8	Q7RXP8_NEUCR	NADH:ubiquinone oxidoreductase 6.6kD subunit	nuo6.6 NCU00160	Neurospora crassa (strain ATCC 24698 / 74-OR23-1A / CBS 708.71 / DSM 1257 / FGSC 987)	75	integral component of membrane [GO:0016021]						UPI00015C3506
NCU00162	Q7RXP6	Q7RXP6_NEUCR	Uncharacterized protein	NCU00162	Neurospora crassa (strain ATCC 24698 / 74-OR23-1A / CBS 708.71 / DSM 1257 / FGSC 987)	436	COPII-coated ER to Golgi transport vesicle [GO:0030134]; endoplasmic reticulum membrane [GO:0005789]; endoplasmic reticulum-Golgi intermediate compartment [GO:0005793]; Golgi membrane [GO:0000139]; integral component of membrane [GO:0016021]; mannose binding [GO:0005537]; endoplasmic reticulum organization [GO:0007029]; endoplasmic reticulum to Golgi vesicle-mediated transport [GO:0006888]; Golgi…		PS51328;	PF03388;			UPI000018B14A
NCU00168	Q7RXP0	Q7RXP0_NEUCR	1-acyl-sn-glycerol-3-phosphate acyltransferase (EC 2.3.1.51)	NCU00168	Neurospora crassa (strain ATCC 24698 / 74-OR23-1A / CBS 708.71 / DSM 1257 / FGSC 987)	305	endoplasmic reticulum [GO:0005783]; integral component of membrane [GO:0016021]; lipid droplet [GO:0005811]; 1-acylglycerol-3-phosphate O-acyltransferase activity [GO:0003841]; phosphatidic acid biosynthetic process [GO:0006654]			PF01553;	SM00563;		UPI000018B150
NCU00169	Q7RXN9	Q7RXN9_NEUCR	Translocation complex component	NCU00169	Neurospora crassa (strain ATCC 24698 / 74-OR23-1A / CBS 708.71 / DSM 1257 / FGSC 987)	700	endoplasmic reticulum [GO:0005783]; integral component of endoplasmic reticulum membrane [GO:0030176]; Sec62/Sec63 complex [GO:0031207]; protein transporter activity [GO:0008565]; posttranslational protein targeting to endoplasmic reticulum membrane [GO:0006620]; posttranslational protein targeting to membrane, translocation [GO:0031204]; SRP-dependent cotranslational protein targeting to membran…		PS00636;PS50076;	PF00226;	SM00271;SM00973;	PTHR24075:SF0;	UPI000018B151
NCU00170	Q7RXN8	Q7RXN8_NEUCR	DNAJ domain-containing protein	NCU00170	Neurospora crassa (strain ATCC 24698 / 74-OR23-1A / CBS 708.71 / DSM 1257 / FGSC 987)	784	cytoplasm [GO:0005737]		PS00636;PS50076;PS50005;PS50293;	PF00226;PF00515;PF07719;	SM00271;SM00028;		UPI000018B152
NCU00173	Q7RXB4	Q7RXB4_NEUCR	S-formylglutathione hydrolase (EC 3.1.2.12)	NCU00173	Neurospora crassa (strain ATCC 24698 / 74-OR23-1A / CBS 708.71 / DSM 1257 / FGSC 987)	368	cytosol [GO:0005829]; carboxylic ester hydrolase activity [GO:0052689]; S-formylglutathione hydrolase activity [GO:0018738]; formaldehyde catabolic process [GO:0046294]			PF00756;		PTHR10061;	UPI0003CB0396
NCU00177	Q7RXB0	Q7RXB0_NEUCR	Phosphoribosylformylglycinamidine cyclo-ligase	NCU00177	Neurospora crassa (strain ATCC 24698 / 74-OR23-1A / CBS 708.71 / DSM 1257 / FGSC 987)	789	cytosol [GO:0005829]; ATP binding [GO:0005524]; metal ion binding [GO:0046872]; phosphoribosylamine-glycine ligase activity [GO:0004637]; phosphoribosylformylglycinamidine cyclo-ligase activity [GO:0004641]; 'de novo' IMP biosynthetic process [GO:0006189]; adenine biosynthetic process [GO:0046084]; purine nucleotide biosynthetic process [GO:0006164]		PS50975;PS00184;	PF00586;PF02769;PF01071;PF02843;PF02844;	SM01210;	PTHR10520;	UPI000018B1D0
NCU00181	Q7RXA6	PPIL2_NEUCR	Peptidyl-prolyl cis-trans isomerase-like 2 (PPIase) (EC 2.3.2.27) (EC 5.2.1.8) (Cyclophilin-60) (Cyclophilin-like protein Cyp-60) (RING-type E3 ubiquitin transferase isomerase-like 2) (Rotamase)	ppi-2 cyp6 NCU00181	Neurospora crassa (strain ATCC 24698 / 74-OR23-1A / CBS 708.71 / DSM 1257 / FGSC 987)	597	nucleus [GO:0005634]; peptidyl-prolyl cis-trans isomerase activity [GO:0003755]; ubiquitin-ubiquitin ligase activity [GO:0034450]; protein folding [GO:0006457]; protein peptidyl-prolyl isomerization [GO:0000413]; protein polyubiquitination [GO:0000209]		PS00170;PS50072;PS51698;	PF00160;PF04564;	SM00504;	PTHR11071;	UPI000018B1D4
NCU00182	Q7RXA5	Q7RXA5_NEUCR	Integral membrane protein	NCU00182	Neurospora crassa (strain ATCC 24698 / 74-OR23-1A / CBS 708.71 / DSM 1257 / FGSC 987)	554	integral component of membrane [GO:0016021]			PF06814;		PTHR21229;	UPI000018B1D5
NCU00183	Q7RXA4	Q7RXA4_NEUCR	Protein arginine methyltransferase NDUFAF7 (EC 2.1.1.320)	NCU00183	Neurospora crassa (strain ATCC 24698 / 74-OR23-1A / CBS 708.71 / DSM 1257 / FGSC 987)	568	mitochondrion [GO:0005739]; protein-arginine omega-N symmetric methyltransferase activity [GO:0035243]; mitochondrial respiratory chain complex I assembly [GO:0032981]			PF02636;		PTHR12049;	UPI000018B1D6
NCU00193	Q7RX94	Q7RX94_NEUCR	Mannosyltransferase (EC 2.4.1.-)	NCU00193	Neurospora crassa (strain ATCC 24698 / 74-OR23-1A / CBS 708.71 / DSM 1257 / FGSC 987)	664	endoplasmic reticulum [GO:0005783]; endoplasmic reticulum membrane [GO:0005789]; integral component of membrane [GO:0016021]; mannosyltransferase activity [GO:0000030]; GPI anchor biosynthetic process [GO:0006506]			PF03901;		PTHR22760;PTHR22760:SF4;	UPI000018B1E0
NCU00194	U9W8E1	U9W8E1_NEUCR	Ornithine aminotransferase (EC 2.6.1.13)	ota NCU00194	Neurospora crassa (strain ATCC 24698 / 74-OR23-1A / CBS 708.71 / DSM 1257 / FGSC 987)	452	cytoplasm [GO:0005737]; ornithine-oxo-acid transaminase activity [GO:0004587]; pyridoxal phosphate binding [GO:0030170]; arginine catabolic process to glutamate [GO:0019544]; arginine catabolic process to proline via ornithine [GO:0010121]; L-proline biosynthetic process [GO:0055129]		PS00600;	PF00202;		PTHR11986:SF18;	UPI000018B1E1
NCU00198	Q8J1Z1	TIM9_NEUCR	Mitochondrial import inner membrane translocase subunit tim9	tim9 NCU00198	Neurospora crassa (strain ATCC 24698 / 74-OR23-1A / CBS 708.71 / DSM 1257 / FGSC 987)	88	mitochondrial intermembrane space protein transporter complex [GO:0042719]; TIM22 mitochondrial import inner membrane insertion complex [GO:0042721]; metal ion binding [GO:0046872]; protein import into mitochondrial inner membrane [GO:0045039]			PF02953;		PTHR10898;	UPI000006CA58
NCU00199	Q7RXM6	Q7RXM6_NEUCR	Uncharacterized protein	NCU00199	Neurospora crassa (strain ATCC 24698 / 74-OR23-1A / CBS 708.71 / DSM 1257 / FGSC 987)	1858	nuclear pore inner ring [GO:0044611]; structural constituent of nuclear pore [GO:0017056]; protein import into nucleus [GO:0006606]			PF10487;			UPI000018B15E
NCU00200	P00908	TRPG_NEUCR	Multifunctional tryptophan biosynthesis protein [Includes: Anthranilate synthase component 2 (AS) (EC 4.1.3.27) (Anthranilate synthase, glutamine amidotransferase component); Indole-3-glycerol phosphate synthase (IGPS) (EC 4.1.1.48); N-(5'-phosphoribosyl)anthranilate isomerase (PRAI) (EC 5.3.1.24)]	trp-1 trpg-trpc-trpf tryp-1 NCU00200	Neurospora crassa (strain ATCC 24698 / 74-OR23-1A / CBS 708.71 / DSM 1257 / FGSC 987)	762	anthranilate synthase complex [GO:0005950]; anthranilate synthase activity [GO:0004049]; indole-3-glycerol-phosphate lyase activity [GO:0033984]; indole-3-glycerol-phosphate synthase activity [GO:0004425]; phosphoribosylanthranilate isomerase activity [GO:0004640]; glutamine metabolic process [GO:0006541]; tryptophan biosynthetic process [GO:0000162]		PS51273;PS00614;	PF00117;PF00218;PF00697;			UPI000018B15F
NCU00202	Q7RXM4	Q7RXM4_NEUCR	Coronin	crn NCU00202	Neurospora crassa (strain ATCC 24698 / 74-OR23-1A / CBS 708.71 / DSM 1257 / FGSC 987)	606			PS00678;PS50082;PS50294;	PF08953;PF00400;	SM01166;SM00320;	PTHR10856;	UPI0003CA11B2
NCU00203	Q7RXM3	Q7RXM3_NEUCR	SIR2 family histone deacetylase	nst-5 NCU00203	Neurospora crassa (strain ATCC 24698 / 74-OR23-1A / CBS 708.71 / DSM 1257 / FGSC 987)	412	NAD+ binding [GO:0070403]		PS50305;	PF02146;			UPI000018B162
NCU00209	Q7RXL7	Q7RXL7_NEUCR	Uncharacterized protein	NCU00209	Neurospora crassa (strain ATCC 24698 / 74-OR23-1A / CBS 708.71 / DSM 1257 / FGSC 987)	888	nuclear pore [GO:0005643]; structural constituent of nuclear pore [GO:0017056]; mRNA export from nucleus [GO:0006406]; protein export from nucleus [GO:0006611]; protein import into nucleus [GO:0006606]; ribosomal large subunit export from nucleus [GO:0000055]; ribosomal small subunit export from nucleus [GO:0000056]					PTHR13257;	UPI000018B168
NCU00211	U9W8F2	U9W8F2_NEUCR	54S ribosomal protein L31, mitochondrial	NCU00211	Neurospora crassa (strain ATCC 24698 / 74-OR23-1A / CBS 708.71 / DSM 1257 / FGSC 987)	110	mitochondrial large ribosomal subunit [GO:0005762]; structural constituent of ribosome [GO:0003735]; mitochondrial translation [GO:0032543]			PF09784;		PTHR28271;	UPI00015C35B6
NCU00212	P04914	H4_NEUCR	Histone H4	hH4-1 hhf1 B7K22.020 NCU01634; hH4-2 hhf2 NCU00212	Neurospora crassa (strain ATCC 24698 / 74-OR23-1A / CBS 708.71 / DSM 1257 / FGSC 987)	103	nucleosome [GO:0000786]; nucleus [GO:0005634]; DNA binding [GO:0003677]; protein heterodimerization activity [GO:0046982]; DNA-templated transcription, initiation [GO:0006352]; nucleosome assembly [GO:0006334]		PS00047;	PF15511;	SM00417;SM00803;		UPI00000013B2
NCU00216	Q7RXL1	NCB5R_NEUCR	NADH-cytochrome b5 reductase 1 (EC 1.6.2.2) (Microsomal cytochrome b reductase)	cbr1 NCU00216	Neurospora crassa (strain ATCC 24698 / 74-OR23-1A / CBS 708.71 / DSM 1257 / FGSC 987)	310	endoplasmic reticulum membrane [GO:0005789]; integral component of membrane [GO:0016021]; mitochondrial outer membrane [GO:0005741]; cytochrome-b5 reductase activity, acting on NAD(P)H [GO:0004128]		PS51384;	PF00970;PF00175;			UPI000018B16E
NCU00219	Q7RXK8	Q7RXK8_NEUCR	Uncharacterized protein	NCU00219	Neurospora crassa (strain ATCC 24698 / 74-OR23-1A / CBS 708.71 / DSM 1257 / FGSC 987)	1826	actin filament binding [GO:0051015]; actin cytoskeleton organization [GO:0030036]; actin filament severing [GO:0051014]			PF13254;	SM00262;	PTHR11977;PTHR11977:SF55;	UPI000018B171
NCU00220	Q7RXK7	MED10_NEUCR	Mediator of RNA polymerase II transcription subunit 10 (Mediator complex subunit 10)	nut2 med10 NCU00220	Neurospora crassa (strain ATCC 24698 / 74-OR23-1A / CBS 708.71 / DSM 1257 / FGSC 987)	253	mediator complex [GO:0016592]; nucleus [GO:0005634]; transcription coregulator activity [GO:0003712]; positive regulation of transcription by RNA polymerase II [GO:0045944]			PF09748;			UPI000018B172
NCU00225	Q7RZY6	Q7RZY6_NEUCR	Uncharacterized protein	NCU00225	Neurospora crassa (strain ATCC 24698 / 74-OR23-1A / CBS 708.71 / DSM 1257 / FGSC 987)	318	RNA binding [GO:0003723]			PF09598;	SM01233;	PTHR12299;	UPI000018AE23
NCU00226	Q7RZY5	Q7RZY5_NEUCR	MFS transporter	NCU00226	Neurospora crassa (strain ATCC 24698 / 74-OR23-1A / CBS 708.71 / DSM 1257 / FGSC 987)	616	integral component of membrane [GO:0016021]; transmembrane transport [GO:0055085]			PF07690;			UPI000018AE24
NCU00227	Q7RZY4	Q7RZY4_NEUCR	Probable mitochondrial transport protein (Fungal sideroflexin)	NCU00227	Neurospora crassa (strain ATCC 24698 / 74-OR23-1A / CBS 708.71 / DSM 1257 / FGSC 987)	340	integral component of membrane [GO:0016021]; mitochondrial membrane [GO:0031966]; ion transmembrane transporter activity [GO:0015075]			PF03820;		PTHR11153;	UPI000018AE25
NCU00232	Q7RZX9	Q7RZX9_NEUCR	Uncharacterized protein	NCU00232	Neurospora crassa (strain ATCC 24698 / 74-OR23-1A / CBS 708.71 / DSM 1257 / FGSC 987)	1099	mitochondrion [GO:0005739]; mitochondrial tRNA 3'-trailer cleavage, endonucleolytic [GO:0072684]			PF13691;			UPI0003CBDA38
NCU00236	Q7RZX5	Q7RZX5_NEUCR	Flavoprotein oxygenase	NCU00236	Neurospora crassa (strain ATCC 24698 / 74-OR23-1A / CBS 708.71 / DSM 1257 / FGSC 987)	366	FMN binding [GO:0010181]			PF01613;	SM00903;		UPI00015C3650
NCU00242	Q7RZW9	Q7RZW9_NEUCR	V-SNARE	NCU00242	Neurospora crassa (strain ATCC 24698 / 74-OR23-1A / CBS 708.71 / DSM 1257 / FGSC 987)	562	endomembrane system [GO:0012505]; integral component of membrane [GO:0016021]; SNARE complex [GO:0031201]; phosphatidylinositol binding [GO:0035091]; SNAP receptor activity [GO:0005484]; SNARE binding [GO:0000149]; intracellular protein transport [GO:0006886]; vesicle docking [GO:0048278]; vesicle fusion [GO:0006906]		PS50195;PS50192;	PF00787;	SM00312;		UPI000018AE34
NCU00243	Q7RZW8	Q7RZW8_NEUCR	Microtubule-associated protein RP/EB family member 1	NCU00243	Neurospora crassa (strain ATCC 24698 / 74-OR23-1A / CBS 708.71 / DSM 1257 / FGSC 987)	248	cytoplasmic microtubule [GO:0005881]; microtubule [GO:0005874]; microtubule organizing center [GO:0005815]; microtubule plus-end [GO:0035371]; spindle midzone [GO:0051233]; microtubule binding [GO:0008017]; microtubule plus-end binding [GO:0051010]; protein localization to microtubule [GO:0035372]; protein localization to microtubule plus-end [GO:1904825]; regulation of microtubule polymerization…		PS50021;PS51230;	PF00307;PF03271;		PTHR10623;	UPI000018AE35
NCU00258	O43105	RS7_NEUCR	40S ribosomal protein S7 (Cytoplasmic ribosomal protein 15)	crp-15 crps-7 rps7 NCU00258	Neurospora crassa (strain ATCC 24698 / 74-OR23-1A / CBS 708.71 / DSM 1257 / FGSC 987)	202	cytosolic small ribosomal subunit [GO:0022627]; small-subunit processome [GO:0032040]; structural constituent of ribosome [GO:0003735]; ribosomal small subunit biogenesis [GO:0042274]; rRNA processing [GO:0006364]; translation [GO:0006412]		PS00948;	PF01251;		PTHR11278;	UPI000018AE44
NCU00260	Q7RZV3	Q7RZV3_NEUCR	Oxidoreductase	NCU00260	Neurospora crassa (strain ATCC 24698 / 74-OR23-1A / CBS 708.71 / DSM 1257 / FGSC 987)	361	oxidoreductase activity [GO:0016491]; zinc ion binding [GO:0008270]		PS00059;	PF08240;PF00107;	SM00829;		UPI000018AE46
NCU00261	Q7RZV2	PYRG_NEUCR	CTP synthase (EC 6.3.4.2) (CTP synthetase) (UTP--ammonia ligase)	pyr-7 ura7 NCU00261	Neurospora crassa (strain ATCC 24698 / 74-OR23-1A / CBS 708.71 / DSM 1257 / FGSC 987)	579	cytoophidium [GO:0097268]; cytoplasm [GO:0005737]; ATP binding [GO:0005524]; CTP synthase activity [GO:0003883]; identical protein binding [GO:0042802]; 'de novo' CTP biosynthetic process [GO:0044210]; CTP biosynthetic process [GO:0006241]; glutamine metabolic process [GO:0006541]; pyrimidine nucleobase biosynthetic process [GO:0019856]		PS51273;	PF06418;PF00117;		PTHR11550;	UPI0003E30FAA
NCU00264	Q7RZU9	Q7RZU9_NEUCR	Uncharacterized protein	NCU00264	Neurospora crassa (strain ATCC 24698 / 74-OR23-1A / CBS 708.71 / DSM 1257 / FGSC 987)	162				PF01722;		PTHR12735;	UPI000018AE4A
NCU00265	Q7RZU8	Q7RZU8_NEUCR	Uncharacterized protein	NCU00265	Neurospora crassa (strain ATCC 24698 / 74-OR23-1A / CBS 708.71 / DSM 1257 / FGSC 987)	314							UPI000018AE4B
NCU00273	Q7RZU0	Q7RZU0_NEUCR	Uncharacterized protein	NCU00273	Neurospora crassa (strain ATCC 24698 / 74-OR23-1A / CBS 708.71 / DSM 1257 / FGSC 987)	1762	nuclear pore inner ring [GO:0044611]; structural constituent of nuclear pore [GO:0017056]; nuclear pore organization [GO:0006999]			PF11894;		PTHR31344:SF0;	UPI0003CBCF29
NCU00278	Q7RZT6	Q7RZT6_NEUCR	NADH dehydrogenase [ubiquinone] 1 alpha subcomplex subunit	NCU00278	Neurospora crassa (strain ATCC 24698 / 74-OR23-1A / CBS 708.71 / DSM 1257 / FGSC 987)	271	mitochondrial inner membrane [GO:0005743]; respirasome [GO:0070469]; electron transfer activity [GO:0009055]; NADH dehydrogenase (ubiquinone) activity [GO:0008137]			PF05071;		PTHR12910;	UPI0003CBCAC3
NCU00289	U9W375	U9W375_NEUCR	TAH-1	tah-1 NCU00289	Neurospora crassa (strain ATCC 24698 / 74-OR23-1A / CBS 708.71 / DSM 1257 / FGSC 987)	659	nucleus [GO:0005634]; DNA binding [GO:0003677]; DNA-binding transcription factor activity, RNA polymerase II-specific [GO:0000981]; zinc ion binding [GO:0008270]; transcription, DNA-templated [GO:0006351]		PS00463;PS50048;	PF04082;PF00172;	SM00066;		UPI000018AE63
NCU00289	U9W3C9	U9W3C9_NEUCR	TAH-1, variant	tah-1 NCU00289	Neurospora crassa (strain ATCC 24698 / 74-OR23-1A / CBS 708.71 / DSM 1257 / FGSC 987)	477	nucleus [GO:0005634]; DNA binding [GO:0003677]; DNA-binding transcription factor activity, RNA polymerase II-specific [GO:0000981]; zinc ion binding [GO:0008270]; transcription, DNA-templated [GO:0006351]		PS00463;PS50048;	PF04082;PF00172;	SM00066;		UPI0003CA8582
NCU00293	Q7RZS1	Q7RZS1_NEUCR	NADH pyrophosphatase	NCU00293	Neurospora crassa (strain ATCC 24698 / 74-OR23-1A / CBS 708.71 / DSM 1257 / FGSC 987)	511	cytosol [GO:0005829]; peroxisome [GO:0005777]; hydrolase activity [GO:0016787]; metal ion binding [GO:0046872]; NADH pyrophosphatase activity [GO:0035529]; NAD catabolic process [GO:0019677]; NADH metabolic process [GO:0006734]; NADP catabolic process [GO:0006742]		PS51462;PS00893;	PF00293;PF09296;PF09297;			UPI0003CA89D8
NCU00294	Q7RZS0	RL10A_NEUCR	60S ribosomal protein L10a (Cytoplasmic ribosomal protein 74)	crp-74 rpl10a NCU00294	Neurospora crassa (strain ATCC 24698 / 74-OR23-1A / CBS 708.71 / DSM 1257 / FGSC 987)	217	cytosolic large ribosomal subunit [GO:0022625]; RNA binding [GO:0003723]; structural constituent of ribosome [GO:0003735]; maturation of LSU-rRNA [GO:0000470]; translation [GO:0006412]		PS01199;	PF00687;			UPI000018AE68
NCU00295	Q7RZR9	Q7RZR9_NEUCR	Uncharacterized protein	NCU00295	Neurospora crassa (strain ATCC 24698 / 74-OR23-1A / CBS 708.71 / DSM 1257 / FGSC 987)	663	cytoplasm [GO:0005737]; cellular response to oxidative stress [GO:0034599]			PF08568;		PTHR28020;	UPI000018AE69
NCU00301	Q7RZR3	Q7RZR3_NEUCR	Sas10/Utp3 family protein	NCU00301	Neurospora crassa (strain ATCC 24698 / 74-OR23-1A / CBS 708.71 / DSM 1257 / FGSC 987)	627	nucleolus [GO:0005730]; small-subunit processome [GO:0032040]; maturation of SSU-rRNA from tricistronic rRNA transcript (SSU-rRNA, 5.8S rRNA, LSU-rRNA) [GO:0000462]			PF09368;PF04000;			UPI000018AE6F
NCU00303	Q7RZR1	Q7RZR1_NEUCR	Smr domain-containing protein	NCU00303	Neurospora crassa (strain ATCC 24698 / 74-OR23-1A / CBS 708.71 / DSM 1257 / FGSC 987)	255			PS50828;	PF08590;PF01713;	SM01162;SM00463;		UPI000018AE71
NCU00308	Q7RZQ6	Q7RZQ6_NEUCR	NOL1/NOP2/Sun domain family protein	NCU00308	Neurospora crassa (strain ATCC 24698 / 74-OR23-1A / CBS 708.71 / DSM 1257 / FGSC 987)	730	nucleolus [GO:0005730]; methyltransferase activity [GO:0008168]; RNA binding [GO:0003723]; rRNA base methylation [GO:0070475]		PS51686;				UPI000018AE76
NCU00311	Q7RZQ3	VTS1_NEUCR	Protein VTS1	vts1 NCU00311	Neurospora crassa (strain ATCC 24698 / 74-OR23-1A / CBS 708.71 / DSM 1257 / FGSC 987)	620	P-body [GO:0000932]; mRNA binding [GO:0003729]; nucleotide binding [GO:0000166]; translation repressor activity [GO:0030371]; negative regulation of translation [GO:0017148]; nuclear-transcribed mRNA poly(A) tail shortening [GO:0000289]; protein transport [GO:0015031]; regulation of mRNA stability [GO:0043488]		PS50105;	PF07647;	SM00454;		UPI0003CA197F
NCU00316	Q7RZP8	Q7RZP8_NEUCR	Peroxisomal adenine nucleotide transporter 1	NCU00316	Neurospora crassa (strain ATCC 24698 / 74-OR23-1A / CBS 708.71 / DSM 1257 / FGSC 987)	339	integral component of membrane [GO:0016021]; transmembrane transporter activity [GO:0022857]		PS50920;	PF00153;		PTHR24089;	UPI000018AE7E
NCU00326	U9WGW9	U9WGW9_NEUCR	Calcium homeostasis protein Regucalcin, variant	NCU00326	Neurospora crassa (strain ATCC 24698 / 74-OR23-1A / CBS 708.71 / DSM 1257 / FGSC 987)	305	calcium ion binding [GO:0005509]; gluconolactonase activity [GO:0004341]; L-ascorbic acid biosynthetic process [GO:0019853]			PF08450;		PTHR10907;	UPI000018AE88
NCU00332	Q7RZN2	Q7RZN2_NEUCR	Uncharacterized protein	NCU00332	Neurospora crassa (strain ATCC 24698 / 74-OR23-1A / CBS 708.71 / DSM 1257 / FGSC 987)	560	integral component of membrane [GO:0016021]						UPI000018AE8E
NCU00334	Q7RZN0	Q7RZN0_NEUCR	3' exoribonuclease	NCU00334	Neurospora crassa (strain ATCC 24698 / 74-OR23-1A / CBS 708.71 / DSM 1257 / FGSC 987)	297	cytoplasmic exosome (RNase complex) [GO:0000177]; nuclear exosome (RNase complex) [GO:0000176]; nucleolus [GO:0005730]; AU-rich element binding [GO:0017091]; exonucleolytic nuclear-transcribed mRNA catabolic process involved in deadenylation-dependent decay [GO:0043928]; exonucleolytic trimming to generate mature 3'-end of 5.8S rRNA from tricistronic rRNA transcript (SSU-rRNA, 5.8S rRNA, LSU-rRNA…			PF01138;PF03725;			UPI000018AE90
NCU00335	Q7RZM9	Q7RZM9_NEUCR	Pre-mRNA-splicing factor cwc15	NCU00335	Neurospora crassa (strain ATCC 24698 / 74-OR23-1A / CBS 708.71 / DSM 1257 / FGSC 987)	273	catalytic step 2 spliceosome [GO:0071013]; RNA binding [GO:0003723]; mRNA cis splicing, via spliceosome [GO:0045292]			PF04889;		PTHR12718;	UPI000018AE91
NCU00336	Q7RZM8	UTP10_NEUCR	U3 small nucleolar RNA-associated protein 10 (Ribosome biogenesis protein 5)	rbg-5 utp10 NCU00336	Neurospora crassa (strain ATCC 24698 / 74-OR23-1A / CBS 708.71 / DSM 1257 / FGSC 987)	1788	90S preribosome [GO:0030686]; small-subunit processome [GO:0032040]; t-UTP complex [GO:0034455]; snoRNA binding [GO:0030515]; maturation of SSU-rRNA from tricistronic rRNA transcript (SSU-rRNA, 5.8S rRNA, LSU-rRNA) [GO:0000462]; positive regulation of transcription by RNA polymerase I [GO:0045943]			PF08146;PF12397;	SM01036;	PTHR13457;	UPI000018AE92
NCU00337	Q7RZM7	Q7RZM7_NEUCR	Nucleolar complex-associated protein 3	NCU00337	Neurospora crassa (strain ATCC 24698 / 74-OR23-1A / CBS 708.71 / DSM 1257 / FGSC 987)	676	nucleolus [GO:0005730]; nucleus [GO:0005634]; chromatin binding [GO:0003682]; ribosome biogenesis [GO:0042254]			PF03914;PF07540;		PTHR14428;	UPI000018AE93
NCU00346	Q7RZL9	Q7RZL9_NEUCR	EBDP2	NCU00346	Neurospora crassa (strain ATCC 24698 / 74-OR23-1A / CBS 708.71 / DSM 1257 / FGSC 987)	354	endoplasmic reticulum [GO:0005783]; integral component of membrane [GO:0016021]; C-8 sterol isomerase activity [GO:0000247]; cholestenol delta-isomerase activity [GO:0047750]; steroid delta-isomerase activity [GO:0004769]; sterol biosynthetic process [GO:0016126]		PS51751;	PF05241;		PTHR14207;	UPI0003CA0501
NCU00347	Q7RZL8	Q7RZL8_NEUCR	Peroxin-26 Pex26-Penicillium chrysogenum	pex26 NCU00347	Neurospora crassa (strain ATCC 24698 / 74-OR23-1A / CBS 708.71 / DSM 1257 / FGSC 987)	505	integral component of membrane [GO:0016021]						UPI000018AE9C
NCU00348	Q7RZL7	Q7RZL7_NEUCR	Pre-mRNA splicing factor	NCU00348	Neurospora crassa (strain ATCC 24698 / 74-OR23-1A / CBS 708.71 / DSM 1257 / FGSC 987)	108	U2 snRNP [GO:0005686]; mRNA splicing, via spliceosome [GO:0000398]			PF03660;		PTHR13120;	UPI00015C3535
NCU00350	Q7RZL5	Q7RZL5_NEUCR	Epoxide hydrolase	NCU00350	Neurospora crassa (strain ATCC 24698 / 74-OR23-1A / CBS 708.71 / DSM 1257 / FGSC 987)	372	hydrolase activity [GO:0016787]			PF12697;			UPI000018AE9F
NCU00355	Q9C169	CAT3_NEUCR	Catalase-3 (EC 1.11.1.6)	cat-3 NCU00355	Neurospora crassa (strain ATCC 24698 / 74-OR23-1A / CBS 708.71 / DSM 1257 / FGSC 987)	719	cytosol [GO:0005829]; catalase activity [GO:0004096]; heme binding [GO:0020037]; metal ion binding [GO:0046872]; hydrogen peroxide catabolic process [GO:0042744]; response to oxidative stress [GO:0006979]		PS00438;PS51402;	PF00199;PF06628;	SM01060;	PTHR42821;	UPI000006C615
NCU00360	Q7RZK6	Q7RZK6_NEUCR	NAD dependent epimerase/dehydratase	NCU00360	Neurospora crassa (strain ATCC 24698 / 74-OR23-1A / CBS 708.71 / DSM 1257 / FGSC 987)	288	mitochondrial respiratory chain complex I [GO:0005747]; coenzyme binding [GO:0050662]; NADH dehydrogenase activity [GO:0003954]; ubiquinone-6 biosynthetic process [GO:1901006]			PF01370;			UPI000018AEA8
NCU00365	Q7RZK1	Q7RZK1_NEUCR	Uncharacterized protein	NCU00365	Neurospora crassa (strain ATCC 24698 / 74-OR23-1A / CBS 708.71 / DSM 1257 / FGSC 987)	65							UPI000018AEAD
NCU00366	Q7RYU2	Q7RYU2_NEUCR	Eukaryotic translation initiation factor 5	NCU00366	Neurospora crassa (strain ATCC 24698 / 74-OR23-1A / CBS 708.71 / DSM 1257 / FGSC 987)	425	translation initiation factor activity [GO:0003743]		PS51363;	PF01873;PF02020;	SM00653;SM00515;		UPI000018AFAF
NCU00371	U9W395	U9W395_NEUCR	Mitochondrial import inner membrane translocase subunit tim23	tim23 NCU00371	Neurospora crassa (strain ATCC 24698 / 74-OR23-1A / CBS 708.71 / DSM 1257 / FGSC 987)	238	integral component of mitochondrial inner membrane [GO:0031305]; TIM23 mitochondrial import inner membrane translocase complex [GO:0005744]; mitochondrion targeting sequence binding [GO:0030943]; protein transmembrane transporter activity [GO:0008320]; protein import into mitochondrial matrix [GO:0030150]						UPI000006ADE3
NCU00372	Q7RYT7	Q7RYT7_NEUCR	Uncharacterized protein	NCU00372	Neurospora crassa (strain ATCC 24698 / 74-OR23-1A / CBS 708.71 / DSM 1257 / FGSC 987)	1602	cytosol [GO:0005829]; tRNA methylation [GO:0030488]			PF10350;			UPI0003CB8771
NCU00376	U9W3F0	U9W3F0_NEUCR	GTR/RAG family GTPase Gtr2, variant	NCU00376	Neurospora crassa (strain ATCC 24698 / 74-OR23-1A / CBS 708.71 / DSM 1257 / FGSC 987)	388	GTP binding [GO:0005525]			PF04670;		PTHR11259;	UPI0003CB716D
NCU00376	U9WGX9	U9WGX9_NEUCR	GTR/RAG family GTPase Gtr2	NCU00376	Neurospora crassa (strain ATCC 24698 / 74-OR23-1A / CBS 708.71 / DSM 1257 / FGSC 987)	427	EGO complex [GO:0034448]; Gtr1-Gtr2 GTPase complex [GO:1990131]; lysosome [GO:0005764]; nucleus [GO:0005634]; GTP binding [GO:0005525]; GTPase activity [GO:0003924]; cellular response to amino acid stimulus [GO:0071230]; cellular response to starvation [GO:0009267]; positive regulation of TOR signaling [GO:0032008]; regulation of autophagy [GO:0010506]			PF04670;		PTHR11259;	UPI000018AFB8
NCU00378	Q7RYT1	Q7RYT1_NEUCR	Aldehyde dehydrogenase	NCU00378	Neurospora crassa (strain ATCC 24698 / 74-OR23-1A / CBS 708.71 / DSM 1257 / FGSC 987)	546	oxidoreductase activity, acting on the aldehyde or oxo group of donors, NAD or NADP as acceptor [GO:0016620]		PS00687;	PF00171;			UPI0003CB37C4
NCU00379	Q7RYT0	Q7RYT0_NEUCR	Uncharacterized protein	NCU00379	Neurospora crassa (strain ATCC 24698 / 74-OR23-1A / CBS 708.71 / DSM 1257 / FGSC 987)	671	integral component of endoplasmic reticulum membrane [GO:0030176]; GTPase activator activity [GO:0005096]; GTPase binding [GO:0051020]; Sar guanyl-nucleotide exchange factor activity [GO:0005090]; protein secretion [GO:0009306]; regulation of COPII vesicle coating [GO:0003400]						UPI000018AFBB
NCU00385	P56525	ATPD_NEUCR	ATP synthase subunit delta, mitochondrial (F-ATPase delta subunit)	des atp16 NCU00385	Neurospora crassa (strain ATCC 24698 / 74-OR23-1A / CBS 708.71 / DSM 1257 / FGSC 987)	165	mitochondrial proton-transporting ATP synthase complex, catalytic core F(1) [GO:0000275]; proton-transporting ATP synthase activity, rotational mechanism [GO:0046933]; ATP synthesis coupled proton transport [GO:0015986]			PF02823;		PTHR13822;	UPI0000418DD0
NCU00388	Q7RYS2	Q7RYS2_NEUCR	Uncharacterized protein	NCU00388	Neurospora crassa (strain ATCC 24698 / 74-OR23-1A / CBS 708.71 / DSM 1257 / FGSC 987)	1609			PS50297;PS50088;	PF12796;	SM00248;		UPI000018AFC4
NCU00389	Q7RYS1	Q7RYS1_NEUCR	Developmentally regulated GTP-binding protein 1	NCU00389	Neurospora crassa (strain ATCC 24698 / 74-OR23-1A / CBS 708.71 / DSM 1257 / FGSC 987)	368	cytoplasm [GO:0005737]; GTP binding [GO:0005525]; cytoplasmic translation [GO:0002181]		PS51710;PS00905;	PF01926;PF16897;PF02824;			UPI0003CA7F46
NCU00395	Q7RYR5	Q7RYR5_NEUCR	mRNA processing protein	NCU00395	Neurospora crassa (strain ATCC 24698 / 74-OR23-1A / CBS 708.71 / DSM 1257 / FGSC 987)	527	extrinsic component of mitochondrial inner membrane [GO:0031314]; translation regulator activity [GO:0045182]; positive regulation of mitochondrial translation [GO:0070131]			PF13824;			UPI0003CA342E
NCU00396	Q7RYR4	RSE1_NEUCR	Pre-mRNA-splicing factor rse1 (mRNA-splicing protein 5)	msp-5 rse1 NCU00396	Neurospora crassa (strain ATCC 24698 / 74-OR23-1A / CBS 708.71 / DSM 1257 / FGSC 987)	1209	nucleus [GO:0005634]; spliceosomal complex [GO:0005681]; nucleic acid binding [GO:0003676]; mRNA splicing, via spliceosome [GO:0000398]			PF03178;			UPI00015F81EB
NCU00396	U9W8L1	U9W8L1_NEUCR	Pre-mRNA-splicing factor rse-1, variant	NCU00396	Neurospora crassa (strain ATCC 24698 / 74-OR23-1A / CBS 708.71 / DSM 1257 / FGSC 987)	913	nucleus [GO:0005634]; nucleic acid binding [GO:0003676]			PF03178;			UPI0003CA083B
NCU00397	Q7RYR3	Q7RYR3_NEUCR	Uncharacterized protein	NCU00397	Neurospora crassa (strain ATCC 24698 / 74-OR23-1A / CBS 708.71 / DSM 1257 / FGSC 987)	260	hydrolase activity, acting on ester bonds [GO:0016788]			PF13472;			UPI00015C35EA
NCU00404	Q7RYQ6	Q7RYQ6_NEUCR	RNA processing factor 1	NCU00404	Neurospora crassa (strain ATCC 24698 / 74-OR23-1A / CBS 708.71 / DSM 1257 / FGSC 987)	427	nucleolus [GO:0005730]; preribosome, large subunit precursor [GO:0030687]; rRNA primary transcript binding [GO:0042134]; ribosomal large subunit assembly [GO:0000027]; rRNA processing [GO:0006364]		PS50833;	PF04427;	SM00879;		UPI000018AFD4
NCU00405	Q7RYQ5	Q7RYQ5_NEUCR	Glycyl-tRNA synthetase 1	NCU00405	Neurospora crassa (strain ATCC 24698 / 74-OR23-1A / CBS 708.71 / DSM 1257 / FGSC 987)	732	cytoplasm [GO:0005737]; mitochondrion [GO:0005739]; ATP binding [GO:0005524]; glycine-tRNA ligase activity [GO:0004820]; glycyl-tRNA aminoacylation [GO:0006426]; mitochondrial glycyl-tRNA aminoacylation [GO:0070150]		PS50862;	PF03129;		PTHR10745;	UPI0003CA7243
NCU00406	Q7RYQ4	Q7RYQ4_NEUCR	Non-specific serine/threonine protein kinase (EC 2.7.11.1)	vel NCU00406	Neurospora crassa (strain ATCC 24698 / 74-OR23-1A / CBS 708.71 / DSM 1257 / FGSC 987)	833	cytoplasm [GO:0005737]; ATP binding [GO:0005524]; protein serine/threonine kinase activity [GO:0004674]; Rac GTPase binding [GO:0048365]; activation of protein kinase activity [GO:0032147]; cell migration [GO:0016477]; regulation of MAPK cascade [GO:0043408]; signal transduction by protein phosphorylation [GO:0023014]; stress-activated protein kinase signaling cascade [GO:0031098]		PS50108;PS50003;PS00107;PS50011;PS00108;	PF00786;PF00069;	SM00285;SM00233;SM00220;		UPI000018AFD6
NCU00408	Q7RYQ2	Q7RYQ2_NEUCR	Uncharacterized protein	NCU00408	Neurospora crassa (strain ATCC 24698 / 74-OR23-1A / CBS 708.71 / DSM 1257 / FGSC 987)	260							UPI000018AFD8
NCU00409	U9W8M3	U9W8M3_NEUCR	Chorismate mutase/prephenate dehydratase, variant	NCU00409	Neurospora crassa (strain ATCC 24698 / 74-OR23-1A / CBS 708.71 / DSM 1257 / FGSC 987)	388	cytoplasm [GO:0005737]; chorismate mutase activity [GO:0004106]; prephenate dehydratase activity [GO:0004664]; L-phenylalanine biosynthetic process [GO:0009094]		PS51671;PS51171;	PF00800;			UPI0003CBB50F
NCU00410	Q1K5S6	Q1K5S6_NEUCR	Eukaryotic release factor 1	NCU00410	Neurospora crassa (strain ATCC 24698 / 74-OR23-1A / CBS 708.71 / DSM 1257 / FGSC 987)	434	cytoplasmic stress granule [GO:0010494]; cytosol [GO:0005829]; translation release factor complex [GO:0018444]; sequence-specific mRNA binding [GO:1990825]; translation release factor activity, codon specific [GO:0016149]; cytoplasmic translational termination [GO:0002184]; DNA-templated transcription, termination [GO:0006353]			PF03463;PF03464;PF03465;	SM01194;	PTHR10113;	UPI000006B89D
NCU00411	Q7RYQ0	Q7RYQ0_NEUCR	Uncharacterized protein	NCU00411	Neurospora crassa (strain ATCC 24698 / 74-OR23-1A / CBS 708.71 / DSM 1257 / FGSC 987)	190				PF08589;		PTHR38699;	UPI0003CA217C
NCU00413	Q7RVQ9	Q7RVQ9_NEUCR	60S ribosomal protein L2	NCU00413	Neurospora crassa (strain ATCC 24698 / 74-OR23-1A / CBS 708.71 / DSM 1257 / FGSC 987)	254	cytosolic large ribosomal subunit [GO:0022625]; structural constituent of ribosome [GO:0003735]; cytoplasmic translation [GO:0002181]		PS00467;	PF00181;PF03947;	SM01383;SM01382;	PTHR13691;	UPI00015C3623
NCU00414	Q7RYP8	Q7RYP8_NEUCR	Adenosine kinase	NCU00414	Neurospora crassa (strain ATCC 24698 / 74-OR23-1A / CBS 708.71 / DSM 1257 / FGSC 987)	454	cytosol [GO:0005829]; nucleus [GO:0005634]; adenosine kinase activity [GO:0004001]; purine ribonucleoside salvage [GO:0006166]		PS00584;	PF00294;			UPI00015C3624
NCU00417	Q7RYP5	Q7RYP5_NEUCR	Cell cycle control protein cwf14	NCU00417	Neurospora crassa (strain ATCC 24698 / 74-OR23-1A / CBS 708.71 / DSM 1257 / FGSC 987)	148	spliceosomal complex [GO:0005681]; mRNA splicing, via spliceosome [GO:0000398]		PS00997;	PF01125;		PTHR19411;	UPI000018AFE0
NCU00418	P42114	NDUA6_NEUCR	NADH-ubiquinone oxidoreductase 14.8 kDa subunit (Complex I-14.8KD) (CI-14.8KD)	nuo14.8 NCU00418	Neurospora crassa (strain ATCC 24698 / 74-OR23-1A / CBS 708.71 / DSM 1257 / FGSC 987)	124	mitochondrial respiratory chain complex I [GO:0005747]; oxidation-reduction process [GO:0055114]; response to oxidative stress [GO:0006979]			PF05347;		PTHR12964;	UPI000016894E
NCU00419	Q7RYP4	Q7RYP4_NEUCR	DNA-directed RNA polymerase I and III polypeptide	NCU00419	Neurospora crassa (strain ATCC 24698 / 74-OR23-1A / CBS 708.71 / DSM 1257 / FGSC 987)	156	RNA polymerase I complex [GO:0005736]; RNA polymerase III complex [GO:0005666]; DNA binding [GO:0003677]; DNA-directed 5'-3' RNA polymerase activity [GO:0003899]; protein dimerization activity [GO:0046983]; transcription by RNA polymerase I [GO:0006360]; transcription by RNA polymerase III [GO:0006383]		PS01154;	PF13656;			UPI000018AFE2
NCU00420	U9WH02	U9WH02_NEUCR	Uncharacterized protein	NCU00420	Neurospora crassa (strain ATCC 24698 / 74-OR23-1A / CBS 708.71 / DSM 1257 / FGSC 987)	522							UPI000018B120
NCU00422	U9W548	U9W548_NEUCR	Curved DNA-binding protein, variant	NCU00422	Neurospora crassa (strain ATCC 24698 / 74-OR23-1A / CBS 708.71 / DSM 1257 / FGSC 987)	410	cytoplasm [GO:0005737]; nucleolus [GO:0005730]; DNA binding [GO:0003677]; ribosomal large subunit export from nucleus [GO:0000055]			PF00557;			UPI000018B122
NCU00424	Q7RVP8	Q7RVP8_NEUCR	Spo76 protein	NCU00424	Neurospora crassa (strain ATCC 24698 / 74-OR23-1A / CBS 708.71 / DSM 1257 / FGSC 987)	1595	chromatin [GO:0000785]; nucleus [GO:0005634]; DNA repair [GO:0006281]; mitotic sister chromatid cohesion [GO:0007064]					PTHR12663;	UPI000018B124
NCU00430	Q7RXS9	Q7RXS9_NEUCR	Na(+)/H(+) antiporter 2	NCU00430	Neurospora crassa (strain ATCC 24698 / 74-OR23-1A / CBS 708.71 / DSM 1257 / FGSC 987)	1018	integral component of membrane [GO:0016021]; membrane raft [GO:0045121]; plasma membrane [GO:0005886]; sodium:proton antiporter activity [GO:0015385]; cellular potassium ion homeostasis [GO:0030007]; potassium ion export across plasma membrane [GO:0097623]; response to osmotic stress [GO:0006970]; sodium ion export across plasma membrane [GO:0036376]			PF00999;PF08619;		PTHR31382:SF4;	UPI000018B12A
NCU00431	Q07335	TOM22_NEUCR	Mitochondrial import receptor subunit tom22 (MOM22 protein) (Mitochondrial 22 kDa outer membrane protein) (Translocase of outer membrane 22 kDa subunit)	tom22 mom22 B13B7.130 NCU00431	Neurospora crassa (strain ATCC 24698 / 74-OR23-1A / CBS 708.71 / DSM 1257 / FGSC 987)	154	integral component of membrane [GO:0016021]; mitochondrial outer membrane translocase complex [GO:0005742]; protein import into mitochondrial matrix [GO:0030150]			PF04281;		PTHR12504:SF0;	UPI0000130CA8
NCU00434	Q7RXS5	Q7RXS5_NEUCR	Protein phosphatase 2C isoform beta	NCU00434	Neurospora crassa (strain ATCC 24698 / 74-OR23-1A / CBS 708.71 / DSM 1257 / FGSC 987)	619	cytosol [GO:0005829]; nucleus [GO:0005634]; magnesium-dependent protein serine/threonine phosphatase activity [GO:0004724]; MAP kinase serine/threonine phosphatase activity [GO:1990439]; metal ion binding [GO:0046872]; protein serine/threonine phosphatase activity [GO:0004722]		PS01032;PS51746;	PF00481;	SM00332;	PTHR13832;	UPI000018B12D
NCU00436	Q7RXS3	Q7RXS3_NEUCR	GTPase FZO1	uvs-5 NCU00436	Neurospora crassa (strain ATCC 24698 / 74-OR23-1A / CBS 708.71 / DSM 1257 / FGSC 987)	918	integral component of mitochondrial outer membrane [GO:0031307]; GTP binding [GO:0005525]; GTPase activity [GO:0003924]; mitochondrial fusion [GO:0008053]		PS51718;	PF00350;		PTHR10465;	UPI000018B12F
NCU00440	F5HH30	F5HH30_NEUCR	Guanine nucleotide-binding protein beta subunit	gnb-1 NCU00440	Neurospora crassa (strain ATCC 24698 / 74-OR23-1A / CBS 708.71 / DSM 1257 / FGSC 987)	358	signal transduction [GO:0007165]		PS00678;PS50082;PS50294;	PF00400;	SM00320;	PTHR19850;	UPI000006C90E
NCU00443	U9W553	U9W553_NEUCR	Ran-specific GTPase-activating protein 1, variant	NCU00443	Neurospora crassa (strain ATCC 24698 / 74-OR23-1A / CBS 708.71 / DSM 1257 / FGSC 987)	250	cytoplasm [GO:0005737]; nuclear pore [GO:0005643]; nucleus [GO:0005634]; Ran GTPase binding [GO:0008536]; intracellular transport [GO:0046907]; positive regulation of GTPase activity [GO:0043547]		PS50196;	PF00638;	SM00160;		UPI000018B136
NCU00444	Q7RXR5	Q7RXR5_NEUCR	Transcription initiation factor TFIID subunit 14	NCU00444	Neurospora crassa (strain ATCC 24698 / 74-OR23-1A / CBS 708.71 / DSM 1257 / FGSC 987)	226	Ino80 complex [GO:0031011]; SWI/SNF complex [GO:0016514]; transcription factor TFIID complex [GO:0005669]; transcription factor TFIIF complex [GO:0005674]; translation initiation factor activity [GO:0003743]; ATP-dependent chromatin remodeling [GO:0043044]; regulation of nucleosome density [GO:0060303]; regulation of transcription by RNA polymerase II [GO:0006357]		PS51037;	PF03366;		PTHR23195;PTHR23195:SF2;	UPI0000233589
NCU00447	Q7RXZ7	Q7RXZ7_NEUCR	Serine palmitoyltransferase 2	NCU00447	Neurospora crassa (strain ATCC 24698 / 74-OR23-1A / CBS 708.71 / DSM 1257 / FGSC 987)	663	SPOTS complex [GO:0035339]; pyridoxal phosphate binding [GO:0030170]; serine C-palmitoyltransferase activity [GO:0004758]; sphingolipid biosynthetic process [GO:0030148]			PF00155;			UPI000018B0E2
NCU00455	Q7RXY9	Q7RXY9_NEUCR	Mapkkk cascade protein kinase regulator ste50	ty-1 NCU00455	Neurospora crassa (strain ATCC 24698 / 74-OR23-1A / CBS 708.71 / DSM 1257 / FGSC 987)	480	kinase activity [GO:0016301]; signal transduction [GO:0007165]		PS50200;PS50105;	PF00788;PF00536;	SM00314;SM00454;		UPI000018B0EA
NCU00456	Q7RXY8	Q7RXY8_NEUCR	Uncharacterized protein	NCU00456	Neurospora crassa (strain ATCC 24698 / 74-OR23-1A / CBS 708.71 / DSM 1257 / FGSC 987)	151	integral component of membrane [GO:0016021]			PF01124;			UPI00015C36A7
NCU00457	Q7RXY7	Q7RXY7_NEUCR	Translation initiation factor 4B	NCU00457	Neurospora crassa (strain ATCC 24698 / 74-OR23-1A / CBS 708.71 / DSM 1257 / FGSC 987)	559	polysome [GO:0005844]; ribosomal small subunit binding [GO:0043024]; RNA strand annealing activity [GO:0033592]; RNA strand-exchange activity [GO:0034057]; translation initiation factor activity [GO:0003743]; cytoplasmic translation [GO:0002181]; eukaryotic translation initiation factor 4F complex assembly [GO:0097010]; formation of translation preinitiation complex [GO:0001731]		PS50102;	PF00076;	SM00360;		UPI000018B0EC
NCU00458	U9W558	U9W558_NEUCR	Uncharacterized protein	NCU00458	Neurospora crassa (strain ATCC 24698 / 74-OR23-1A / CBS 708.71 / DSM 1257 / FGSC 987)	226							UPI000018B0ED
NCU00461	P00365	DHE2_NEUCR	NAD-specific glutamate dehydrogenase (NAD-GDH) (EC 1.4.1.2)	gdh-1 NCU00461	Neurospora crassa (strain ATCC 24698 / 74-OR23-1A / CBS 708.71 / DSM 1257 / FGSC 987)	1050	glutamate dehydrogenase (NAD+) activity [GO:0004352]; glutamate catabolic process to 2-oxoglutarate [GO:0019551]		PS00074;	PF00208;	SM00839;		UPI000018B0F0
NCU00463	Q7RXY2	KYNU2_NEUCR	Kynureninase 2 (EC 3.7.1.3) (Biosynthesis of nicotinic acid protein 5-2) (L-kynurenine hydrolase 2)	kyn-2 bna5-2 NCU00463	Neurospora crassa (strain ATCC 24698 / 74-OR23-1A / CBS 708.71 / DSM 1257 / FGSC 987)	472	cytoplasm [GO:0005737]; kynureninase activity [GO:0030429]; pyridoxal phosphate binding [GO:0030170]; 'de novo' NAD biosynthetic process from tryptophan [GO:0034354]; anthranilate metabolic process [GO:0043420]; L-kynurenine catabolic process [GO:0097053]; quinolinate biosynthetic process [GO:0019805]; tryptophan catabolic process to kynurenine [GO:0019441]			PF00266;		PTHR14084;	UPI00015C36D7
NCU00464	Q7RXY1	RL32_NEUCR	60S ribosomal protein L32 (Cytoplasmic ribosomal protein-63)	crp-63 rpl32 NCU00464	Neurospora crassa (strain ATCC 24698 / 74-OR23-1A / CBS 708.71 / DSM 1257 / FGSC 987)	131	cytosolic large ribosomal subunit [GO:0022625]; structural constituent of ribosome [GO:0003735]; translation [GO:0006412]		PS00580;	PF01655;	SM01393;	PTHR23413;	UPI000018B0F3
NCU00465	U9WH18	U9WH18_NEUCR	Chaperone dnaJ, variant	NCU00465	Neurospora crassa (strain ATCC 24698 / 74-OR23-1A / CBS 708.71 / DSM 1257 / FGSC 987)	423	ATP binding [GO:0005524]; heat shock protein binding [GO:0031072]; metal ion binding [GO:0046872]; unfolded protein binding [GO:0051082]; protein folding [GO:0006457]; response to heat [GO:0009408]		PS00636;PS50076;PS51188;	PF00226;PF01556;PF00684;	SM00271;		UPI000018B0F4
NCU00466	Q7RXX9	Q7RXX9_NEUCR	Glutamyl-tRNA synthetase	NCU00466	Neurospora crassa (strain ATCC 24698 / 74-OR23-1A / CBS 708.71 / DSM 1257 / FGSC 987)	656	cytoplasm [GO:0005737]; ATP binding [GO:0005524]; glutamate-tRNA ligase activity [GO:0004818]; tRNA binding [GO:0000049]; zinc ion binding [GO:0008270]; glutamyl-tRNA aminoacylation [GO:0006424]			PF00749;			UPI0003CB42D8
NCU00467	Q7RXX8	CSN5_NEUCR	COP9 signalosome complex subunit 5 (EC 3.4.-.-)	csn-5 rri1 NCU00467	Neurospora crassa (strain ATCC 24698 / 74-OR23-1A / CBS 708.71 / DSM 1257 / FGSC 987)	336	COP9 signalosome [GO:0008180]; cytoplasm [GO:0005737]; metal ion binding [GO:0046872]; metalloendopeptidase activity [GO:0004222]; metallopeptidase activity [GO:0008237]; NEDD8-specific protease activity [GO:0019784]; protein deneddylation [GO:0000338]		PS50249;	PF01398;	SM00232;	PTHR10410:SF6;	UPI000018B0F6
NCU00468	U9W564	U9W564_NEUCR	Prephenate dehydrogenase	NCU00468	Neurospora crassa (strain ATCC 24698 / 74-OR23-1A / CBS 708.71 / DSM 1257 / FGSC 987)	445	NAD+ binding [GO:0070403]; prephenate dehydrogenase (NAD+) activity [GO:0008977]; prephenate dehydrogenase (NADP+) activity [GO:0004665]; oxidation-reduction process [GO:0055114]; tyrosine biosynthetic process [GO:0006571]		PS51176;	PF02153;			UPI0003CA2D3D
NCU00468	U9W8P4	U9W8P4_NEUCR	Prephenate dehydrogenase, variant	NCU00468	Neurospora crassa (strain ATCC 24698 / 74-OR23-1A / CBS 708.71 / DSM 1257 / FGSC 987)	407	prephenate dehydrogenase (NAD+) activity [GO:0008977]; prephenate dehydrogenase (NADP+) activity [GO:0004665]; tyrosine biosynthetic process [GO:0006571]		PS51176;	PF02153;			UPI0003CAB225
NCU00469	Q7RXX6	Q7RXX6_NEUCR	Alpha-tubulin suppressor protein Aats1	NCU00469	Neurospora crassa (strain ATCC 24698 / 74-OR23-1A / CBS 708.71 / DSM 1257 / FGSC 987)	369			PS50012;	PF00415;			UPI000018B0F8
NCU00472	Q7RXX3	Q7RXX3_NEUCR	CDC37	NCU00472	Neurospora crassa (strain ATCC 24698 / 74-OR23-1A / CBS 708.71 / DSM 1257 / FGSC 987)	490	cytoplasm [GO:0005737]; chaperone binding [GO:0051087]; heat shock protein binding [GO:0031072]; protein kinase binding [GO:0019901]; unfolded protein binding [GO:0051082]; protein folding [GO:0006457]; protein stabilization [GO:0050821]			PF08564;PF08565;PF03234;	SM01069;SM01070;SM01071;	PTHR12800;	UPI000018B0FB
NCU00475	Q7RXX0	Q7RXX0_NEUCR	40S ribosomal protein S18	NCU00475	Neurospora crassa (strain ATCC 24698 / 74-OR23-1A / CBS 708.71 / DSM 1257 / FGSC 987)	156	cytosol [GO:0005829]; ribosome [GO:0005840]; RNA binding [GO:0003723]; structural constituent of ribosome [GO:0003735]; translation [GO:0006412]		PS00646;PS50159;	PF00416;			UPI00015C3705
NCU00476	Q7RXW9	Q7RXW9_NEUCR	UPF0023 family protein	NCU00476	Neurospora crassa (strain ATCC 24698 / 74-OR23-1A / CBS 708.71 / DSM 1257 / FGSC 987)	315	mature ribosome assembly [GO:0042256]			PF01172;PF09377;		PTHR10927;PTHR10927:SF1;	UPI000018B0FF
NCU00477	Q7RXW8	CBPYA_NEUCR	Carboxypeptidase Y homolog A (EC 3.4.16.5)	cpyA NCU00477	Neurospora crassa (strain ATCC 24698 / 74-OR23-1A / CBS 708.71 / DSM 1257 / FGSC 987)	554	fungal-type vacuole [GO:0000324]; serine-type carboxypeptidase activity [GO:0004185]; phytochelatin biosynthetic process [GO:0046938]; proteolysis involved in cellular protein catabolic process [GO:0051603]		PS00131;	PF05388;PF00450;		PTHR11802;	UPI000018B100
NCU00478	U9W570	U9W570_NEUCR	Phosphodiesterase (EC 3.1.4.-)	acon-2 NCU00478	Neurospora crassa (strain ATCC 24698 / 74-OR23-1A / CBS 708.71 / DSM 1257 / FGSC 987)	834	3',5'-cyclic-AMP phosphodiesterase activity [GO:0004115]; metal ion binding [GO:0046872]; cAMP-mediated signaling [GO:0019933]		PS00126;PS51845;	PF00233;	SM00471;		UPI0003CAC74D
NCU00480	Q7RWU7	Q7RWU7_NEUCR	Ubiquitin C-terminal hydrolase	NCU00480	Neurospora crassa (strain ATCC 24698 / 74-OR23-1A / CBS 708.71 / DSM 1257 / FGSC 987)	1516	thiol-dependent ubiquitin-specific protease activity [GO:0004843]; protein deubiquitination [GO:0016579]; ubiquitin-dependent protein catabolic process [GO:0006511]		PS51283;PS00972;PS00973;PS50235;	PF06337;PF00443;	SM00695;	PTHR43913;	UPI0003CB1570
NCU00481	Q7RWU6	Q7RWU6_NEUCR	A-pheromone processing metallopeptidase Ste23	NCU00481	Neurospora crassa (strain ATCC 24698 / 74-OR23-1A / CBS 708.71 / DSM 1257 / FGSC 987)	1269	mitochondrion [GO:0005739]; catalytic activity [GO:0003824]; metal ion binding [GO:0046872]; proteolysis involved in cellular protein catabolic process [GO:0051603]			PF00675;PF05193;PF16187;			UPI0003CA0C38
NCU00483	Q7RWU4	Q7RWU4_NEUCR	Uncharacterized protein	NCU00483	Neurospora crassa (strain ATCC 24698 / 74-OR23-1A / CBS 708.71 / DSM 1257 / FGSC 987)	304	nucleic acid binding [GO:0003676]; zinc ion binding [GO:0008270]		PS50158;	PF00098;	SM00343;		UPI0003CAA933
NCU00484	Q7RWU3	Q7RWU3_NEUCR	NADH:ubiquinone oxidoreductase 18.4kD subunit	nuo18.4 NCU00484	Neurospora crassa (strain ATCC 24698 / 74-OR23-1A / CBS 708.71 / DSM 1257 / FGSC 987)	165	mitochondrial respiratory chain complex I [GO:0005747]; mitochondrial electron transport, NADH to ubiquinone [GO:0006120]			PF10276;			UPI000018B27F
NCU00486	Q7RWU1	Q7RWU1_NEUCR	Uncharacterized protein	NCU00486	Neurospora crassa (strain ATCC 24698 / 74-OR23-1A / CBS 708.71 / DSM 1257 / FGSC 987)	916							UPI0003CAAD8B
NCU00487	Q7RWU0	Q7RWU0_NEUCR	Protein-lysine N-methyltransferase EFM4 (EC 2.1.1.-) (Elongation factor methyltransferase 4)	EFM4 NCU00487	Neurospora crassa (strain ATCC 24698 / 74-OR23-1A / CBS 708.71 / DSM 1257 / FGSC 987)	311	cytoplasm [GO:0005737]; protein-lysine N-methyltransferase activity [GO:0016279]; vesicle-mediated transport [GO:0016192]			PF13847;			UPI000018B282
NCU00488	A7UVV2	A7UVV2_NEUCR	Protein phosphatase PP2A regulatory subunit A	NCU00488	Neurospora crassa (strain ATCC 24698 / 74-OR23-1A / CBS 708.71 / DSM 1257 / FGSC 987)	635	actomyosin contractile ring [GO:0005826]; cellular bud neck [GO:0005935]; cellular bud tip [GO:0005934]; cytoplasm [GO:0005737]; FAR/SIN/STRIPAK complex [GO:0090443]; mating projection tip [GO:0043332]; nucleus [GO:0005634]; protein phosphatase type 2A complex [GO:0000159]; spindle pole body [GO:0005816]; protein phosphatase regulator activity [GO:0019888]; protein serine/threonine phosphatase ac…		PS50077;				UPI0003CA7002
NCU00489	Q7RV52	Q7RV52_NEUCR	Cytoplasmic ribosomal protein 10	crp-10 NCU00489	Neurospora crassa (strain ATCC 24698 / 74-OR23-1A / CBS 708.71 / DSM 1257 / FGSC 987)	262	cytosolic small ribosomal subunit [GO:0022627]; nucleus [GO:0005634]; preribosome, small subunit precursor [GO:0030688]; damaged DNA binding [GO:0003684]; DNA-(apurinic or apyrimidinic site) endonuclease activity [GO:0003906]; oxidized purine DNA binding [GO:0032357]; oxidized purine nucleobase lesion DNA N-glycosylase activity [GO:0008534]; protein kinase A catalytic subunit binding [GO:0034236]…		PS50823;PS00548;	PF07650;PF00189;			UPI00015C3735
NCU00493	Q7RWT5	Q7RWT5_NEUCR	Coatomer subunit delta	NCU00493	Neurospora crassa (strain ATCC 24698 / 74-OR23-1A / CBS 708.71 / DSM 1257 / FGSC 987)	512	COPI vesicle coat [GO:0030126]; COPI-coated vesicle [GO:0030137]; cytosol [GO:0005829]; Golgi membrane [GO:0000139]; endoplasmic reticulum to Golgi vesicle-mediated transport [GO:0006888]; Golgi localization [GO:0051645]; protein transport [GO:0015031]; retrograde vesicle-mediated transport, Golgi to endoplasmic reticulum [GO:0006890]		PS51072;	PF00928;PF01217;		PTHR10121;	UPI000018B288
NCU00501	Q7SE72	Q7SE72_NEUCR	Nucleolar complex protein 4	NCU00501	Neurospora crassa (strain ATCC 24698 / 74-OR23-1A / CBS 708.71 / DSM 1257 / FGSC 987)	547	Noc4p-Nop14p complex [GO:0030692]; nucleolus [GO:0005730]; small-subunit processome [GO:0032040]; ribosome biogenesis [GO:0042254]			PF03914;		PTHR12455;	UPI0000189A20
NCU00502	Q7SE71	ATPF_NEUCR	ATP synthase subunit 4, mitochondrial	atp-3 atp4 NCU00502	Neurospora crassa (strain ATCC 24698 / 74-OR23-1A / CBS 708.71 / DSM 1257 / FGSC 987)	241	mitochondrial proton-transporting ATP synthase complex, coupling factor F(o) [GO:0000276]; proton transmembrane transporter activity [GO:0015078]; ATP hydrolysis coupled cation transmembrane transport [GO:0099132]; ATP synthesis coupled proton transport [GO:0015986]			PF05405;		PTHR12733;	UPI0000189A21
NCU00505	V5IR69	V5IR69_NEUCR	Small nuclear ribonucleoprotein Sm D1 (snRNP core protein D1)	NCU00505	Neurospora crassa (strain ATCC 24698 / 74-OR23-1A / CBS 708.71 / DSM 1257 / FGSC 987)	116	nucleus [GO:0005634]; spliceosomal snRNP assembly [GO:0000387]			PF01423;	SM00651;	PTHR23338;	UPI0003CA0EA7
NCU00505	V5IRG1	V5IRG1_NEUCR	Small nuclear ribonucleoprotein Sm D1 (snRNP core protein D1)	NCU00505	Neurospora crassa (strain ATCC 24698 / 74-OR23-1A / CBS 708.71 / DSM 1257 / FGSC 987)	123	catalytic step 2 spliceosome [GO:0071013]; commitment complex [GO:0000243]; cytosol [GO:0005829]; pICln-Sm protein complex [GO:0034715]; SMN-Sm protein complex [GO:0034719]; U1 snRNP [GO:0005685]; U12-type spliceosomal complex [GO:0005689]; U2 snRNP [GO:0005686]; U2-type prespliceosome [GO:0071004]; U4 snRNP [GO:0005687]; U4/U6 x U5 tri-snRNP complex [GO:0046540]; U5 snRNP [GO:0005682]; mRNA bind…			PF01423;	SM00651;	PTHR23338;	UPI0000189A24
NCU00506	Q7SE67	Q7SE67_NEUCR	ER membrane protein	pkr1 NCU00506	Neurospora crassa (strain ATCC 24698 / 74-OR23-1A / CBS 708.71 / DSM 1257 / FGSC 987)	167	integral component of endoplasmic reticulum membrane [GO:0030176]; vacuolar proton-transporting V-type ATPase complex assembly [GO:0070072]			PF08636;		PTHR28251;	UPI0000189A25
NCU00513	Q7SE60	Q7SE60_NEUCR	Phosphotransferase enzyme family domain-containing protein	NCU00513	Neurospora crassa (strain ATCC 24698 / 74-OR23-1A / CBS 708.71 / DSM 1257 / FGSC 987)	388	transferase activity [GO:0016740]			PF01636;			UPI0000189A2C
NCU00518	Q7SE55	Q7SE55_NEUCR	MGS207 protein	NCU00518	Neurospora crassa (strain ATCC 24698 / 74-OR23-1A / CBS 708.71 / DSM 1257 / FGSC 987)	407	oxidoreductase activity [GO:0016491]			PF14027;		PTHR35870;	UPI00015C3797
NCU00519	Q7SCL8	Q7SCL8_NEUCR	Ribulose-phosphate 3-epimerase (EC 5.1.3.1)	NCU00519	Neurospora crassa (strain ATCC 24698 / 74-OR23-1A / CBS 708.71 / DSM 1257 / FGSC 987)	251	cytosol [GO:0005829]; metal ion binding [GO:0046872]; ribulose-phosphate 3-epimerase activity [GO:0004750]; cellular carbohydrate metabolic process [GO:0044262]; pentose catabolic process [GO:0019323]; pentose-phosphate shunt, non-oxidative branch [GO:0009052]		PS01085;PS01086;	PF00834;		PTHR11749;	UPI00015C3798
NCU00520	Q7SCL7	Q7SCL7_NEUCR	Oxidoreductase	NCU00520	Neurospora crassa (strain ATCC 24698 / 74-OR23-1A / CBS 708.71 / DSM 1257 / FGSC 987)	663	cytoplasm [GO:0005737]; iron ion binding [GO:0005506]; L-ascorbic acid binding [GO:0031418]; peptidyl-proline dioxygenase activity [GO:0031543]; peptidyl-proline hydroxylation [GO:0019511]; regulation of translational termination [GO:0006449]		PS51471;	PF13661;PF10637;	SM00702;		UPI0000189C53
NCU00522	Q7SCL5	Q7SCL5_NEUCR	Cystathionine beta-lyase	NCU00522	Neurospora crassa (strain ATCC 24698 / 74-OR23-1A / CBS 708.71 / DSM 1257 / FGSC 987)	419	cytoplasm [GO:0005737]; cystathionine gamma-lyase activity [GO:0004123]; cystathionine gamma-synthase activity [GO:0003962]; pyridoxal phosphate binding [GO:0030170]; 'de novo' L-methionine biosynthetic process [GO:0071266]; cysteine biosynthetic process via cystathionine [GO:0019343]; transsulfuration [GO:0019346]		PS00868;	PF01053;		PTHR11808;	UPI00015C34CF
NCU00527	Q7SDL7	Q7SDL7_NEUCR	Mitochondrial genome maintenance protein Mgr2	NCU00527	Neurospora crassa (strain ATCC 24698 / 74-OR23-1A / CBS 708.71 / DSM 1257 / FGSC 987)	115	integral component of membrane [GO:0016021]; mitochondrion [GO:0005739]; TIM23 mitochondrial import inner membrane translocase complex [GO:0005744]; protein import into mitochondrial inner membrane [GO:0045039]; protein import into mitochondrial matrix [GO:0030150]			PF10247;	SM01378;	PTHR28525;	UPI00015C34D1
NCU00528	Q7SDL6	Q7SDL6_NEUCR	FHA domain-containing protein	ham-4 NCU00528	Neurospora crassa (strain ATCC 24698 / 74-OR23-1A / CBS 708.71 / DSM 1257 / FGSC 987)	797	integral component of membrane [GO:0016021]		PS50006;	PF00498;	SM00240;		UPI0003CBB8EE
NCU00536	Q7SDK8	Q7SDK8_NEUCR	Homoserine O-acetyltransferase	NCU00536	Neurospora crassa (strain ATCC 24698 / 74-OR23-1A / CBS 708.71 / DSM 1257 / FGSC 987)	525	cytoplasm [GO:0005737]; serine O-acetyltransferase activity [GO:0009001]; cysteine biosynthetic process [GO:0019344]			PF00561;			UPI0000189AFB
NCU00541	V5IQ86	V5IQ86_NEUCR	Uncharacterized protein	NCU00541	Neurospora crassa (strain ATCC 24698 / 74-OR23-1A / CBS 708.71 / DSM 1257 / FGSC 987)	356							UPI0003CBB381
NCU00541	V5IQL3	V5IQL3_NEUCR	Uncharacterized protein	NCU00541	Neurospora crassa (strain ATCC 24698 / 74-OR23-1A / CBS 708.71 / DSM 1257 / FGSC 987)	414							UPI0000189B00
NCU00549	Q7SF99	Q7SF99_NEUCR	Glutathione transferase omega-1	NCU00549	Neurospora crassa (strain ATCC 24698 / 74-OR23-1A / CBS 708.71 / DSM 1257 / FGSC 987)	373	transferase activity [GO:0016740]		PS50405;PS50404;	PF13409;			UPI0003CBB478
NCU00551	Q7SF97	Q7SF97_NEUCR	Myosin type-2 heavy chain 2	myo2 NCU00551	Neurospora crassa (strain ATCC 24698 / 74-OR23-1A / CBS 708.71 / DSM 1257 / FGSC 987)	2418	myosin complex [GO:0016459]; actin filament binding [GO:0051015]; ATP binding [GO:0005524]; motor activity [GO:0003774]		PS50096;PS51456;PS51844;	PF00063;PF02736;PF01576;	SM00242;		UPI0003CAFC84
NCU00552	P21334	CRTI_NEUCR	Phytoene desaturase (EC 1.3.99.30) (Albino-1 protein) (Phytoene desaturase (3,4-didehydrolycopene-forming))	al-1 NCU00552	Neurospora crassa (strain ATCC 24698 / 74-OR23-1A / CBS 708.71 / DSM 1257 / FGSC 987)	595	integral component of membrane [GO:0016021]; oxidoreductase activity [GO:0016491]; carotenoid biosynthetic process [GO:0016117]		PS00982;	PF01593;			UPI00001284BF
NCU00553	Q7SF96	Q7SF96_NEUCR	Rho GTPase activator	NCU00553	Neurospora crassa (strain ATCC 24698 / 74-OR23-1A / CBS 708.71 / DSM 1257 / FGSC 987)	742	cytoplasm [GO:0005737]; GTPase activator activity [GO:0005096]; regulation of GTPase activity [GO:0043087]; signal transduction [GO:0007165]		PS51741;PS50238;	PF00611;PF00620;	SM00055;SM00324;		UPI00001898A0
NCU00554	Q7SF95	Q7SF95_NEUCR	Aspartate-semialdehyde dehydrogenase	hom-1 NCU00554	Neurospora crassa (strain ATCC 24698 / 74-OR23-1A / CBS 708.71 / DSM 1257 / FGSC 987)	362	cytoplasm [GO:0005737]; aspartate-semialdehyde dehydrogenase activity [GO:0004073]; NAD binding [GO:0051287]; NADP binding [GO:0050661]; protein dimerization activity [GO:0046983]; homoserine biosynthetic process [GO:0009090]; methionine biosynthetic process [GO:0009086]; threonine biosynthetic process [GO:0009088]		PS01103;	PF01118;PF02774;	SM00859;		UPI00001898A1
NCU00556	Q7SF93	Q7SF93_NEUCR	RNA binding protein	NCU00556	Neurospora crassa (strain ATCC 24698 / 74-OR23-1A / CBS 708.71 / DSM 1257 / FGSC 987)	574	U1 snRNP [GO:0005685]; snRNA stem-loop binding [GO:0035614]; U1 snRNA binding [GO:0030619]; mRNA splicing, via spliceosome [GO:0000398]		PS50102;	PF00076;	SM00360;		UPI0003CA410C
NCU00560	Q7SF89	Q7SF89_NEUCR	WD domain-containing protein	NCU00560	Neurospora crassa (strain ATCC 24698 / 74-OR23-1A / CBS 708.71 / DSM 1257 / FGSC 987)	412	nuclear pre-replicative complex [GO:0005656]; Rix1 complex [GO:0097344]; pre-replicative complex assembly involved in nuclear cell cycle DNA replication [GO:0006267]; regulation of DNA-dependent DNA replication initiation [GO:0030174]; ribosomal large subunit assembly [GO:0000027]; rRNA processing [GO:0006364]		PS50082;PS50294;	PF00400;	SM00320;		UPI00001898A7
NCU00562	Q7SF87	Q7SF87_NEUCR	Uncharacterized protein	NCU00562	Neurospora crassa (strain ATCC 24698 / 74-OR23-1A / CBS 708.71 / DSM 1257 / FGSC 987)	578	integral component of membrane [GO:0016021]						UPI00001898A9
NCU00564	Q7SF85	Q7SF85_NEUCR	Mitochondrial 40S ribosomal protein MRP2	NCU00564	Neurospora crassa (strain ATCC 24698 / 74-OR23-1A / CBS 708.71 / DSM 1257 / FGSC 987)	113	mitochondrial small ribosomal subunit [GO:0005763]; structural constituent of ribosome [GO:0003735]; translation [GO:0006412]			PF00253;		PTHR19836;	UPI00001898AB
NCU00565	Q7SF84	LIPA_NEUCR	Lipoyl synthase, mitochondrial (EC 2.8.1.8) (Lipoate synthase) (LS) (Lip-syn) (Lipoic acid synthase)	NCU00565	Neurospora crassa (strain ATCC 24698 / 74-OR23-1A / CBS 708.71 / DSM 1257 / FGSC 987)	430	mitochondrion [GO:0005739]; 4 iron, 4 sulfur cluster binding [GO:0051539]; lipoate synthase activity [GO:0016992]; metal ion binding [GO:0046872]; lipoate biosynthetic process [GO:0009107]; protein lipoylation [GO:0009249]			PF16881;PF04055;	SM00729;	PTHR10949;	UPI00001898AC
NCU00566	Q7SF83	Q7SF83_NEUCR	Synaptobrevin	NCU00566	Neurospora crassa (strain ATCC 24698 / 74-OR23-1A / CBS 708.71 / DSM 1257 / FGSC 987)	116	integral component of membrane [GO:0016021]; vesicle-mediated transport [GO:0016192]		PS50892;	PF00957;			UPI00015C3563
NCU00567	P54898	ARG56_NEUCR	Protein arg-6, mitochondrial [Cleaved into: N-acetyl-gamma-glutamyl-phosphate reductase (EC 1.2.1.38) (N-acetyl-glutamate semialdehyde dehydrogenase) (NAGSA dehydrogenase); Acetylglutamate kinase (EC 2.7.2.8) (N-acetyl-L-glutamate 5-phosphotransferase) (NAG kinase) (AGK)]	arg-6 orn-2 NCU00567	Neurospora crassa (strain ATCC 24698 / 74-OR23-1A / CBS 708.71 / DSM 1257 / FGSC 987)	871	mitochondrial matrix [GO:0005759]; acetyl-CoA:L-glutamate N-acetyltransferase activity [GO:0004042]; arginine binding [GO:0034618]; ATP binding [GO:0005524]; kinase activity [GO:0016301]; N-acetyl-gamma-glutamyl-phosphate reductase activity [GO:0003942]; NAD binding [GO:0051287]; arginine biosynthetic process [GO:0006526]		PS01224;PS51731;	PF00696;PF04768;PF01118;	SM00859;		UPI00001898AE
NCU00571	Q7SF79	Q7SF79_NEUCR	Uncharacterized protein	NCU00571	Neurospora crassa (strain ATCC 24698 / 74-OR23-1A / CBS 708.71 / DSM 1257 / FGSC 987)	208			PS50297;PS50088;	PF12796;	SM00248;		UPI00001898B2
NCU00573	Q7SF77	Q7SF77_NEUCR	Uncharacterized protein	NCU00573	Neurospora crassa (strain ATCC 24698 / 74-OR23-1A / CBS 708.71 / DSM 1257 / FGSC 987)	748	ATP binding [GO:0005524]			PF00012;		PTHR19375;	UPI00015C3565
NCU00575	Q7SF75	Q7SF75_NEUCR	Glucokinase	NCU00575	Neurospora crassa (strain ATCC 24698 / 74-OR23-1A / CBS 708.71 / DSM 1257 / FGSC 987)	770	cytosol [GO:0005829]; ATP binding [GO:0005524]; fructokinase activity [GO:0008865]; glucokinase activity [GO:0004340]; glucose binding [GO:0005536]; mannokinase activity [GO:0019158]; cellular glucose homeostasis [GO:0001678]; glycolytic process [GO:0006096]		PS00378;PS51748;	PF00349;PF03727;		PTHR19443;	UPI0003CBA22E
NCU00578	Q7SF72	PPIL1_NEUCR	Peptidyl-prolyl cis-trans isomerase-like 1 (PPIase) (EC 5.2.1.8) (Rotamase)	ppi-1 cyp1 B22I21.300 NCU00578	Neurospora crassa (strain ATCC 24698 / 74-OR23-1A / CBS 708.71 / DSM 1257 / FGSC 987)	163	nucleus [GO:0005634]; peptidyl-prolyl cis-trans isomerase activity [GO:0003755]; protein folding [GO:0006457]; protein peptidyl-prolyl isomerization [GO:0000413]		PS00170;PS50072;	PF00160;		PTHR11071;	UPI00015C3566
NCU00579	V5IQ74	V5IQ74_NEUCR	Oxysterol binding protein 1, variant	NCU00579	Neurospora crassa (strain ATCC 24698 / 74-OR23-1A / CBS 708.71 / DSM 1257 / FGSC 987)	1208			PS50297;PS50088;PS01013;PS50003;	PF00023;PF12796;PF01237;PF00169;	SM00248;SM00233;	PTHR10972;	UPI0003CBDA6E
NCU00579	V5IQK7	V5IQK7_NEUCR	Oxysterol binding protein 1	NCU00579	Neurospora crassa (strain ATCC 24698 / 74-OR23-1A / CBS 708.71 / DSM 1257 / FGSC 987)	1238	cytosol [GO:0005829]; endoplasmic reticulum [GO:0005783]; intracellular membrane-bounded organelle [GO:0043231]; membrane [GO:0016020]; nuclear envelope [GO:0005635]; lipid binding [GO:0008289]; sterol binding [GO:0032934]; sterol transporter activity [GO:0015248]; endocytosis [GO:0006897]; exocytosis [GO:0006887]; maintenance of cell polarity [GO:0030011]; piecemeal microautophagy of the nucleus…		PS50297;PS50088;PS01013;PS50003;	PF00023;PF12796;PF01237;PF00169;	SM00248;SM00233;	PTHR10972;	UPI000018948F
NCU00582	Q7SI68	CRYD_NEUCR	Putative cryptochrome DASH, mitochondrial	cry B22I21.260 NCU00582	Neurospora crassa (strain ATCC 24698 / 74-OR23-1A / CBS 708.71 / DSM 1257 / FGSC 987)	745	mitochondrion [GO:0005739]; DNA photolyase activity [GO:0003913]; DNA repair [GO:0006281]; protein-chromophore linkage [GO:0018298]		PS51645;	PF00875;PF03441;			UPI0000189492
NCU00584	Q7SI66	Q7SI66_NEUCR	Uncharacterized protein	NCU00584	Neurospora crassa (strain ATCC 24698 / 74-OR23-1A / CBS 708.71 / DSM 1257 / FGSC 987)	330	integral component of membrane [GO:0016021]			PF03061;			UPI0000189494
NCU00585	P37295	LCPS_NEUCR	Bifunctional lycopene cyclase/phytoene synthase (Protein albino-2) [Includes: Lycopene beta-cyclase (EC 5.5.1.19) (Carotene cyclase) (Lycopene cyclase); Phytoene synthase (EC 2.5.1.32)]	al-2 B22I21.230 NCU00585	Neurospora crassa (strain ATCC 24698 / 74-OR23-1A / CBS 708.71 / DSM 1257 / FGSC 987)	602	integral component of membrane [GO:0016021]; farnesyl-diphosphate farnesyltransferase activity [GO:0004310]; geranylgeranyl-diphosphate geranylgeranyltransferase activity [GO:0016767]; intramolecular lyase activity [GO:0016872]; lycopene beta cyclase activity [GO:0045436]; phytoene synthase activity [GO:0046905]; squalene synthase activity [GO:0051996]; carotene biosynthetic process [GO:0016120];…		PS01044;PS01045;				UPI000013284B
NCU00587	V5IQK3	V5IQK3_NEUCR	Mitogen activated protein kinase kinase, variant	os-5 NCU00587	Neurospora crassa (strain ATCC 24698 / 74-OR23-1A / CBS 708.71 / DSM 1257 / FGSC 987)	683	cytoplasm [GO:0005737]; ATP binding [GO:0005524]; MAP kinase kinase activity [GO:0004708]; protein serine/threonine kinase activity [GO:0004674]; activation of MAPK activity [GO:0000187]; activation of MAPK activity involved in osmosensory signaling pathway [GO:0000169]; activation of protein kinase activity [GO:0032147]; cellular hyperosmotic response [GO:0071474]; signal transduction by protein…		PS50011;PS00108;	PF00069;	SM00220;		UPI0000189497
NCU00590	Q7SI61	Q7SI61_NEUCR	Uncharacterized protein	NCU00590	Neurospora crassa (strain ATCC 24698 / 74-OR23-1A / CBS 708.71 / DSM 1257 / FGSC 987)	262				PF01243;			UPI000018949A
NCU00592	Q7SI59	CWC25_NEUCR	Pre-mRNA-splicing factor cwc25 (mRNA-splicing protein 6)	msp-6 cwc25 B22I21.170 NCU00592	Neurospora crassa (strain ATCC 24698 / 74-OR23-1A / CBS 708.71 / DSM 1257 / FGSC 987)	444	spliceosomal complex [GO:0005681]; mRNA processing [GO:0006397]; RNA splicing [GO:0008380]			PF10197;PF12542;	SM01083;		UPI000018949C
NCU00593	Q7SI58	CSN2_NEUCR	COP9 signalosome complex subunit 2 (Signalosome subunit 2)	csn-2 B22I21.160 NCU00593	Neurospora crassa (strain ATCC 24698 / 74-OR23-1A / CBS 708.71 / DSM 1257 / FGSC 987)	490	COP9 signalosome [GO:0008180]; cytoplasm [GO:0005737]; transcription corepressor activity [GO:0003714]; negative regulation of transcription, DNA-templated [GO:0045892]		PS50250;	PF01399;	SM00088;	PTHR10678:SF3;	UPI000018949D
NCU00595	Q7SI56	Q7SI56_NEUCR	Ubiquitin thiolesterase	NCU00595	Neurospora crassa (strain ATCC 24698 / 74-OR23-1A / CBS 708.71 / DSM 1257 / FGSC 987)	666	nucleus [GO:0005634]; NEDD8-specific protease activity [GO:0019784]; thiol-dependent ubiquitin-specific protease activity [GO:0004843]; ubiquitin binding [GO:0043130]; protein K48-linked deubiquitination [GO:0071108]		PS50802;	PF10275;		PTHR12931;	UPI000018949F
NCU00596	Q7SI55	Q7SI55_NEUCR	Lipoyltransferase	NCU00596	Neurospora crassa (strain ATCC 24698 / 74-OR23-1A / CBS 708.71 / DSM 1257 / FGSC 987)	384	mitochondrion [GO:0005739]; lipoyl(octanoyl) transferase activity [GO:0033819]; protein lipoylation [GO:0009249]		PS51733;				UPI00001894A0
NCU00597	Q7SI54	Q7SI54_NEUCR	Deoxyribose-phosphate aldolase 2	NCU00597	Neurospora crassa (strain ATCC 24698 / 74-OR23-1A / CBS 708.71 / DSM 1257 / FGSC 987)	349				PF02598;		PTHR12150;	UPI00001894A1
NCU00599	Q7SI52	Q7SI52_NEUCR	Mito ribosomal protein S22	NCU00599	Neurospora crassa (strain ATCC 24698 / 74-OR23-1A / CBS 708.71 / DSM 1257 / FGSC 987)	870	mitochondrial small ribosomal subunit [GO:0005763]; methyltransferase activity [GO:0008168]; structural constituent of ribosome [GO:0003735]; translation [GO:0006412]			PF09243;			UPI00001894A3
NCU00600	Q6MUQ7	Q6MUQ7_NEUCS	Probable rho3 protein (Small Rho-type GTPase)	B22I21.090 rho-3 GE21DRAFT_2127 NCU00600	Neurospora crassa	207	GTP binding [GO:0005525]; GTPase activity [GO:0003924]; small GTPase mediated signal transduction [GO:0007264]		PS51420;	PF00071;			UPI00001894A4
NCU00600	Q7SI51	Q7SI51_NEUCR	Small Rho-type GTPase	rho-3 NCU00600	Neurospora crassa (strain ATCC 24698 / 74-OR23-1A / CBS 708.71 / DSM 1257 / FGSC 987)	207	cell cortex [GO:0005938]; cell division site [GO:0032153]; cellular bud [GO:0005933]; cytoplasm [GO:0005737]; cytosol [GO:0005829]; intracellular membrane-bounded organelle [GO:0043231]; GTP binding [GO:0005525]; GTPase activity [GO:0003924]; protein kinase binding [GO:0019901]; actin filament bundle assembly [GO:0051017]; actin filament organization [GO:0007015]; establishment or maintenance of …		PS51420;	PF00071;			UPI00001894A4
NCU00602	Q7SI49	Q7SI49_NEUCR	Siroheme synthase	NCU00602	Neurospora crassa (strain ATCC 24698 / 74-OR23-1A / CBS 708.71 / DSM 1257 / FGSC 987)	622	uroporphyrin-III C-methyltransferase activity [GO:0004851]; siroheme biosynthetic process [GO:0019354]; sulfate assimilation [GO:0000103]			PF14823;PF14824;PF00590;			UPI00001894A6
NCU00605	Q7SI46	Q7SI46_NEUCR	ThiF domain-containing protein	NCU00605	Neurospora crassa (strain ATCC 24698 / 74-OR23-1A / CBS 708.71 / DSM 1257 / FGSC 987)	510	tRNA threonylcarbamoyladenosine dehydratase [GO:0061503]; ubiquitin-like modifier activating enzyme activity [GO:0008641]; cyclic threonylcarbamoyladenosine biosynthetic process [GO:0061504]			PF00899;			UPI00001894A9
NCU00614	Q7SI37	Q7SI37_NEUCR	DUF1620 domain-containing protein	NCU00614	Neurospora crassa (strain ATCC 24698 / 74-OR23-1A / CBS 708.71 / DSM 1257 / FGSC 987)	972	ER membrane protein complex [GO:0072546]; protein folding in endoplasmic reticulum [GO:0034975]			PF07774;PF13360;		PTHR21573;	UPI00001894B2
NCU00617	Q7SI34	Q7SI34_NEUCR	Phosducin family protein	NCU00617	Neurospora crassa (strain ATCC 24698 / 74-OR23-1A / CBS 708.71 / DSM 1257 / FGSC 987)	256				PF02114;			UPI00001894B5
NCU00618	Q7RVN2	RS27_NEUCR	40S ribosomal protein S27 (Cytoplasmic ribosomal protein 6)	crp-6 rps27 NCU00618	Neurospora crassa (strain ATCC 24698 / 74-OR23-1A / CBS 708.71 / DSM 1257 / FGSC 987)	82	cytosolic small ribosomal subunit [GO:0022627]; metal ion binding [GO:0046872]; structural constituent of ribosome [GO:0003735]; ribosomal small subunit assembly [GO:0000028]; translation [GO:0006412]			PF01667;		PTHR11594;	UPI00001894B6
NCU00622	Q7SI30	Q7SI30_NEUCR	Cell polarity protein	NCU00622	Neurospora crassa (strain ATCC 24698 / 74-OR23-1A / CBS 708.71 / DSM 1257 / FGSC 987)	1491	cell cortex of cell tip [GO:0051285]; regulation of cell shape [GO:0008360]			PF01344;	SM00612;		UPI00001894BA
NCU00623	Q7SI29	Q7SI29_NEUCR	Integral membrane protein	NCU00623	Neurospora crassa (strain ATCC 24698 / 74-OR23-1A / CBS 708.71 / DSM 1257 / FGSC 987)	248	cytoplasm [GO:0005737]; integral component of membrane [GO:0016021]			PF04117;		PTHR11266;	UPI00001894BB
NCU00624	Q7SI28	Q7SI28_NEUCR	ER to Golgi transporter Yif1	yif1 NCU00624	Neurospora crassa (strain ATCC 24698 / 74-OR23-1A / CBS 708.71 / DSM 1257 / FGSC 987)	322	COPII-coated ER to Golgi transport vesicle [GO:0030134]; endoplasmic reticulum membrane [GO:0005789]; endoplasmic reticulum-Golgi intermediate compartment [GO:0005793]; integral component of Golgi membrane [GO:0030173]; endoplasmic reticulum to Golgi vesicle-mediated transport [GO:0006888]			PF03878;		PTHR14083;	UPI00001894BC
NCU00627	Q7SI25	Q7SI25_NEUCR	Uncharacterized protein	NCU00627	Neurospora crassa (strain ATCC 24698 / 74-OR23-1A / CBS 708.71 / DSM 1257 / FGSC 987)	569							UPI00001894BF
NCU00629	Q7SI23	Q7SI23_NEUCR	ATP-dependent 6-phosphofructokinase (ATP-PFK) (Phosphofructokinase) (EC 2.7.1.11) (Phosphohexokinase)	emp-3 NCU00629	Neurospora crassa (strain ATCC 24698 / 74-OR23-1A / CBS 708.71 / DSM 1257 / FGSC 987)	845	6-phosphofructokinase complex [GO:0005945]; mitochondrion [GO:0005739]; 6-phosphofructokinase activity [GO:0003872]; AMP binding [GO:0016208]; ATP binding [GO:0005524]; fructose-6-phosphate binding [GO:0070095]; identical protein binding [GO:0042802]; metal ion binding [GO:0046872]; monosaccharide binding [GO:0048029]; canonical glycolysis [GO:0061621]; fructose 1,6-bisphosphate metabolic process…		PS00433;	PF00365;			UPI0003CA98D6
NCU00633	Q7SI19	Q7SI19_NEUCR	Uncharacterized protein	NCU00633	Neurospora crassa (strain ATCC 24698 / 74-OR23-1A / CBS 708.71 / DSM 1257 / FGSC 987)	370							UPI00001894C5
NCU00634	Q7SI18	Q7SI18_NEUCR	Ribosomal protein L14	NCU00634	Neurospora crassa (strain ATCC 24698 / 74-OR23-1A / CBS 708.71 / DSM 1257 / FGSC 987)	142	cytosolic large ribosomal subunit [GO:0022625]; RNA binding [GO:0003723]; structural constituent of ribosome [GO:0003735]; ribosomal large subunit biogenesis [GO:0042273]; translation [GO:0006412]			PF01929;		PTHR11127;	UPI00001894C6
NCU00635	Q7SI17	NACA_NEUCR	Nascent polypeptide-associated complex subunit alpha (NAC-alpha) (Alpha-NAC) (Nascent poypeptide complex protein 1)	npc-1 egd2 NCU00635	Neurospora crassa (strain ATCC 24698 / 74-OR23-1A / CBS 708.71 / DSM 1257 / FGSC 987)	200	nascent polypeptide-associated complex [GO:0005854]; nucleus [GO:0005634]; protein transport [GO:0015031]		PS51151;	PF01849;	SM01407;	PTHR21713;	UPI00001894C7
NCU00636	Q7SI16	ATP7_NEUCR	ATP synthase subunit d, mitochondrial	atp7 NCU00636	Neurospora crassa (strain ATCC 24698 / 74-OR23-1A / CBS 708.71 / DSM 1257 / FGSC 987)	173	mitochondrial proton-transporting ATP synthase, stator stalk [GO:0000274]; proton transmembrane transporter activity [GO:0015078]; ATP hydrolysis coupled cation transmembrane transport [GO:0099132]; ATP synthesis coupled proton transport [GO:0015986]			PF05873;		PTHR12700;	UPI00001894C8
NCU00644	Q7SI08	Q7SI08_NEUCR	ATP synthase subunit G	NCU00644	Neurospora crassa (strain ATCC 24698 / 74-OR23-1A / CBS 708.71 / DSM 1257 / FGSC 987)	187	mitochondrial proton-transporting ATP synthase complex, coupling factor F(o) [GO:0000276]; proton transmembrane transporter activity [GO:0015078]; ATP hydrolysis coupled cation transmembrane transport [GO:0099132]; ATP synthesis coupled proton transport [GO:0015986]			PF04718;		PTHR12386;	UPI00015C3659
NCU00649	Q7SI03	Q7SI03_NEUCR	Npt1p	nic-6 NCU00649	Neurospora crassa (strain ATCC 24698 / 74-OR23-1A / CBS 708.71 / DSM 1257 / FGSC 987)	477	chromosome, telomeric region [GO:0000781]; cytosol [GO:0005829]; nucleus [GO:0005634]; nicotinate phosphoribosyltransferase activity [GO:0004516]; nicotinate-nucleotide diphosphorylase (carboxylating) activity [GO:0004514]; chromatin silencing at rDNA [GO:0000183]; chromatin silencing at telomere [GO:0006348]; NAD biosynthetic process [GO:0009435]; NAD salvage [GO:0034355]; nicotinate nucleotide …			PF04095;		PTHR11098;	UPI00001894D5
NCU00650	Q7SI02	Q7SI02_NEUCR	Wdr1p	NCU00650	Neurospora crassa (strain ATCC 24698 / 74-OR23-1A / CBS 708.71 / DSM 1257 / FGSC 987)	879	90S preribosome [GO:0030686]; small-subunit processome [GO:0032040]; t-UTP complex [GO:0034455]; maturation of SSU-rRNA from tricistronic rRNA transcript (SSU-rRNA, 5.8S rRNA, LSU-rRNA) [GO:0000462]		PS50082;PS50294;	PF13360;PF00400;	SM00320;		UPI00015C3682
NCU00655	V5IR42	V5IR42_NEUCR	Mitochondrial enoyl reductase, variant	NCU00655	Neurospora crassa (strain ATCC 24698 / 74-OR23-1A / CBS 708.71 / DSM 1257 / FGSC 987)	433	mitochondrion [GO:0005739]; trans-2-enoyl-CoA reductase (NADPH) activity [GO:0019166]; fatty acid metabolic process [GO:0006631]			PF08240;PF00107;	SM00829;		UPI00001894DB
NCU00665	Q7SHY7	Q7SHY7_NEUCR	Ser/Thr protein phosphatase	NCU00665	Neurospora crassa (strain ATCC 24698 / 74-OR23-1A / CBS 708.71 / DSM 1257 / FGSC 987)	628	hydrolase activity [GO:0016787]; nucleotide catabolic process [GO:0009166]			PF00149;		PTHR11575;PTHR11575:SF22;	UPI00001894E4
NCU00668	Q7SHY5	Q7SHY5_NEUCR	Rho guanyl nucleotide exchange factor	rgf1 NCU00668	Neurospora crassa (strain ATCC 24698 / 74-OR23-1A / CBS 708.71 / DSM 1257 / FGSC 987)	1251	Rho guanyl-nucleotide exchange factor activity [GO:0005089]; intracellular signal transduction [GO:0035556]; regulation of Rho protein signal transduction [GO:0035023]		PS50219;PS50186;PS50010;	PF00780;PF00610;PF00621;	SM00036;SM00049;SM00325;		UPI00001894E6
NCU00669	Q7SHY4	Q7SHY4_NEUCR	Dolichyl-diphosphooligosaccharide--protein glycosyltransferase subunit WBP1 (Oligosaccharyl transferase subunit WBP1)	NCU00669	Neurospora crassa (strain ATCC 24698 / 74-OR23-1A / CBS 708.71 / DSM 1257 / FGSC 987)	466	endoplasmic reticulum [GO:0005783]; integral component of membrane [GO:0016021]; oligosaccharyltransferase complex [GO:0008250]; transferase activity, transferring glycosyl groups [GO:0016757]; protein N-linked glycosylation via asparagine [GO:0018279]			PF03345;		PTHR10830;	UPI00001894E7
NCU00670	P42117	NDUA3_NEUCR	NADH-ubiquinone oxidoreductase 9.5 kDa subunit (Complex I-9.5kD) (CI-9.5) (Ubiquinone-binding protein)	nuo9.5 NCU00670	Neurospora crassa (strain ATCC 24698 / 74-OR23-1A / CBS 708.71 / DSM 1257 / FGSC 987)	82	integral component of membrane [GO:0016021]; mitochondrial inner membrane [GO:0005743]; respirasome [GO:0070469]; oxidation-reduction process [GO:0055114]					PTHR38488;	UPI000016D6C3
NCU00673	Q7SHY0	Q7SHY0_NEUCR	Serine protease p2	NCU00673	Neurospora crassa (strain ATCC 24698 / 74-OR23-1A / CBS 708.71 / DSM 1257 / FGSC 987)	532	extracellular space [GO:0005615]; serine-type endopeptidase activity [GO:0004252]		PS00137;PS00138;	PF05922;PF00082;			UPI00001894EA
NCU00675	Q7SHX8	EFR3_NEUCR	Protein efr-3	efr-3 NCU00675	Neurospora crassa (strain ATCC 24698 / 74-OR23-1A / CBS 708.71 / DSM 1257 / FGSC 987)	1125	plasma membrane [GO:0005886]; protein localization to plasma membrane [GO:0072659]					PTHR12444;	UPI00001894EC
NCU00676	Q7SHX7	Q7SHX7_NEUCR	F1-ATP synthase assembly protein	NCU00676	Neurospora crassa (strain ATCC 24698 / 74-OR23-1A / CBS 708.71 / DSM 1257 / FGSC 987)	431	proton-transporting ATP synthase complex assembly [GO:0043461]			PF07542;		PTHR21013;	UPI00015C36DA
NCU00680	Q7SHX3	Q7SHX3_NEUCR	2-methylcitrate dehydratase	NCU00680	Neurospora crassa (strain ATCC 24698 / 74-OR23-1A / CBS 708.71 / DSM 1257 / FGSC 987)	565	2 iron, 2 sulfur cluster binding [GO:0051537]; 2-methylcitrate dehydratase activity [GO:0047547]; propionate catabolic process, 2-methylcitrate cycle [GO:0019629]; propionate metabolic process, methylcitrate cycle [GO:0019679]			PF03972;		PTHR16943;	UPI00001894F1
NCU00684	V5IQH6	V5IQH6_NEUCR	Endonuclease/Exonuclease/phosphatase, variant	NCU00684	Neurospora crassa (strain ATCC 24698 / 74-OR23-1A / CBS 708.71 / DSM 1257 / FGSC 987)	442	integral component of membrane [GO:0016021]; endonuclease activity [GO:0004519]; exonuclease activity [GO:0004527]; phosphatidylinositol dephosphorylation [GO:0046856]				SM00128;		UPI0003CBBE59
NCU00684	V5IRQ4	V5IRQ4_NEUCR	Endonuclease/Exonuclease/phosphatase	NCU00684	Neurospora crassa (strain ATCC 24698 / 74-OR23-1A / CBS 708.71 / DSM 1257 / FGSC 987)	558	endoplasmic reticulum [GO:0005783]; integral component of membrane [GO:0016021]; endonuclease activity [GO:0004519]; exonuclease activity [GO:0004527]; phosphatidylinositol-4,5-bisphosphate 5-phosphatase activity [GO:0004439]; inositol phosphate dephosphorylation [GO:0046855]; phosphatidylinositol dephosphorylation [GO:0046856]				SM00128;		UPI00001894F5
NCU00685	V5IQ40	V5IQ40_NEUCR	Casein kinase I isoform delta	ck-1a NCU00685	Neurospora crassa (strain ATCC 24698 / 74-OR23-1A / CBS 708.71 / DSM 1257 / FGSC 987)	384	cytoplasm [GO:0005737]; nucleus [GO:0005634]; ATP binding [GO:0005524]; protein serine/threonine kinase activity [GO:0004674]; endocytosis [GO:0006897]; peptidyl-serine phosphorylation [GO:0018105]; peptidyl-threonine phosphorylation [GO:0018107]		PS00107;PS50011;PS00108;	PF00069;	SM00220;		UPI0003CBA10D
NCU00685	V5IR38	V5IR38_NEUCR	Casein kinase I isoform delta, variant 2	ck-1a NCU00685	Neurospora crassa (strain ATCC 24698 / 74-OR23-1A / CBS 708.71 / DSM 1257 / FGSC 987)	361	ATP binding [GO:0005524]; protein serine/threonine kinase activity [GO:0004674]		PS00107;PS50011;PS00108;	PF00069;	SM00220;		UPI00015C36DF
NCU00685	V5IRD9	V5IRD9_NEUCR	Casein kinase I isoform delta, variant 1	ck-1a NCU00685	Neurospora crassa (strain ATCC 24698 / 74-OR23-1A / CBS 708.71 / DSM 1257 / FGSC 987)	363	ATP binding [GO:0005524]; protein serine/threonine kinase activity [GO:0004674]		PS00107;PS50011;PS00108;	PF00069;	SM00220;		UPI0003CAB053
NCU00687	Q7SHW7	Q7SHW7_NEUCR	Uncharacterized protein	NCU00687	Neurospora crassa (strain ATCC 24698 / 74-OR23-1A / CBS 708.71 / DSM 1257 / FGSC 987)	504	cell tip [GO:0051286]; medial cortex [GO:0031097]; site of polarized growth [GO:0030427]; fungal-type cell wall organization or biogenesis [GO:0071852]; regulation of cell shape [GO:0008360]			PF08316;		PTHR28307;	UPI0003CB7D09
NCU00692	Q7SHW2	Q7SHW2_NEUCR	Chaperone dnaK	NCU00692	Neurospora crassa (strain ATCC 24698 / 74-OR23-1A / CBS 708.71 / DSM 1257 / FGSC 987)	571	cytoplasm [GO:0005737]; cytosol [GO:0005829]; polysome [GO:0005844]; ATP binding [GO:0005524]; ATPase activity [GO:0016887]; ATPase activity, coupled [GO:0042623]; heat shock protein binding [GO:0031072]; misfolded protein binding [GO:0051787]; protein binding involved in protein folding [GO:0044183]; unfolded protein binding [GO:0051082]; cellular response to heat [GO:0034605]; cellular response…			PF00012;		PTHR19375;	UPI00001894FD
NCU00695	Q7SHV9	Q7SHV9_NEUCR	Uncharacterized protein	NCU00695	Neurospora crassa (strain ATCC 24698 / 74-OR23-1A / CBS 708.71 / DSM 1257 / FGSC 987)	536	extracellular space [GO:0005615]; fungal-type vacuole membrane [GO:0000329]; macroautophagy [GO:0016236]		PS50213;	PF02469;	SM00554;		UPI0000189500
NCU00696	Q7SHV8	Q7SHV8_NEUCR	SH3 domain-containing protein	NCU00696	Neurospora crassa (strain ATCC 24698 / 74-OR23-1A / CBS 708.71 / DSM 1257 / FGSC 987)	329	endocytosis [GO:0006897]		PS50002;	PF00018;	SM00326;	PTHR43965;	UPI0000189501
NCU00706	Q7RVK8	Q7RVK8_NEUCR	60S ribosomal protein L44	NCU00706	Neurospora crassa (strain ATCC 24698 / 74-OR23-1A / CBS 708.71 / DSM 1257 / FGSC 987)	106	cytosolic large ribosomal subunit [GO:0022625]; structural constituent of ribosome [GO:0003735]; translation [GO:0006412]		PS01172;	PF00935;		PTHR10369;	UPI00015C3739
NCU00707	Q7SET9	Q7SET9_NEUCR	Uncharacterized protein	NCU00707	Neurospora crassa (strain ATCC 24698 / 74-OR23-1A / CBS 708.71 / DSM 1257 / FGSC 987)	309	nucleus [GO:0005634]; mRNA binding [GO:0003729]; RNA binding [GO:0003723]		PS50102;	PF00076;	SM00360;		UPI0003CB8C79
NCU00712	Q7SET4	Q7SET4_NEUCR	3-hydroxy-3-methylglutaryl coenzyme A reductase (HMG-CoA reductase) (EC 1.1.1.34)	NCU00712	Neurospora crassa (strain ATCC 24698 / 74-OR23-1A / CBS 708.71 / DSM 1257 / FGSC 987)	1173	endoplasmic reticulum membrane [GO:0005789]; integral component of membrane [GO:0016021]; peroxisomal membrane [GO:0005778]; hydroxymethylglutaryl-CoA reductase (NADPH) activity [GO:0004420]; hydroxymethylglutaryl-CoA reductase activity [GO:0042282]; NADP binding [GO:0050661]; coenzyme A metabolic process [GO:0015936]; ergosterol biosynthetic process [GO:0006696]; isoprenoid biosynthetic process …		PS00066;PS00318;PS01192;PS50065;PS50156;	PF00368;PF13323;PF12349;		PTHR10572;	UPI0000189947
NCU00713	Q7SET3	Q7SET3_NEUCR	Isochorismatase family hydrolase	nic-8 NCU00713	Neurospora crassa (strain ATCC 24698 / 74-OR23-1A / CBS 708.71 / DSM 1257 / FGSC 987)	297	hydrolase activity [GO:0016787]			PF00857;			UPI0000189948
NCU00714	Q7SET2	Q7SET2_NEUCR	Heat shock protein STI1	NCU00714	Neurospora crassa (strain ATCC 24698 / 74-OR23-1A / CBS 708.71 / DSM 1257 / FGSC 987)	578	Hsp90 protein binding [GO:0051879]		PS50005;PS50293;	PF07719;PF13181;	SM00727;SM00028;		UPI0000189949
NCU00720	Q7SES6	Q7SES6_NEUCR	L-lactate dehydrogenase (EC 1.1.1.27)	tca-17 NCU00720	Neurospora crassa (strain ATCC 24698 / 74-OR23-1A / CBS 708.71 / DSM 1257 / FGSC 987)	324	cytoplasm [GO:0005737]; L-lactate dehydrogenase activity [GO:0004459]; carbohydrate metabolic process [GO:0005975]; carboxylic acid metabolic process [GO:0019752]		PS00064;	PF02866;PF00056;			UPI000018994F
NCU00725	Q7SEF2	Q7SEF2_NEUCR	Epsin-3	NCU00725	Neurospora crassa (strain ATCC 24698 / 74-OR23-1A / CBS 708.71 / DSM 1257 / FGSC 987)	521			PS50942;	PF01417;	SM00273;		UPI0003CACC1A
NCU00726	P10255	CYPH_NEUCR	Peptidyl-prolyl cis-trans isomerase, mitochondrial (PPIase) (EC 5.2.1.8) (Cyclophilin) (CPH) (Cyclosporin A-binding protein) (Rotamase)	csr-1 cyp NCU00726	Neurospora crassa (strain ATCC 24698 / 74-OR23-1A / CBS 708.71 / DSM 1257 / FGSC 987)	223	mitochondrion [GO:0005739]; nucleus [GO:0005634]; cyclosporin A binding [GO:0016018]; peptidyl-prolyl cis-trans isomerase activity [GO:0003755]; unfolded protein binding [GO:0051082]; protein refolding [GO:0042026]		PS00170;PS50072;	PF00160;		PTHR11071;	UPI0000128C91
NCU00727	Q7SEF1	Q7SEF1_NEUCR	DNA-directed RNA polymerase III subunit RPC6 (RNA polymerase III subunit C6)	NCU00727	Neurospora crassa (strain ATCC 24698 / 74-OR23-1A / CBS 708.71 / DSM 1257 / FGSC 987)	410	RNA polymerase III complex [GO:0005666]; DNA-directed 5'-3' RNA polymerase activity [GO:0003899]; transcription by RNA polymerase III [GO:0006383]			PF05158;		PTHR12780;	UPI00001899D2
NCU00737	Q7SEE1	PAM17_NEUCR	Presequence translocated-associated motor subunit pam17, mitochondrial	pam17 NCU00737	Neurospora crassa (strain ATCC 24698 / 74-OR23-1A / CBS 708.71 / DSM 1257 / FGSC 987)	267	integral component of membrane [GO:0016021]; PAM complex, Tim23 associated import motor [GO:0001405]; protein import into mitochondrial matrix [GO:0030150]			PF08566;		PTHR28021;	UPI00001899DC
NCU00741	Q7SED7	Q7SED7_NEUCR	Gliotoxin biosynthesis protein GliK	NCU00741	Neurospora crassa (strain ATCC 24698 / 74-OR23-1A / CBS 708.71 / DSM 1257 / FGSC 987)	483	integral component of membrane [GO:0016021]; gamma-glutamylcyclotransferase activity [GO:0003839]					PTHR12935;	UPI00001899E0
NCU00742	Q7SED6	Q7SED6_NEUCR	Glycerol-3-phosphate dehydrogenase [NAD(+)] (EC 1.1.1.8)	NCU00742	Neurospora crassa (strain ATCC 24698 / 74-OR23-1A / CBS 708.71 / DSM 1257 / FGSC 987)	524	cytosol [GO:0005829]; glycerol-3-phosphate dehydrogenase complex [GO:0009331]; glycerol-3-phosphate dehydrogenase [NAD(P)+] activity [GO:0047952]; glycerol-3-phosphate dehydrogenase [NAD+] activity [GO:0004367]; NAD binding [GO:0051287]; protein homodimerization activity [GO:0042803]; carbohydrate metabolic process [GO:0005975]; glycerol-3-phosphate catabolic process [GO:0046168]; glycerol-3-phos…			PF07479;PF01210;			UPI0003CB03AE
NCU00743	Q7SED5	Q7SED5_NEUCR	Glycogen debranching enzyme	NCU00743	Neurospora crassa (strain ATCC 24698 / 74-OR23-1A / CBS 708.71 / DSM 1257 / FGSC 987)	1566	4-alpha-glucanotransferase activity [GO:0004134]; amylo-alpha-1,6-glucosidase activity [GO:0004135]; glycogen biosynthetic process [GO:0005978]; glycogen catabolic process [GO:0005980]			PF06202;PF14701;PF14702;PF14699;		PTHR10569;	UPI0003CB529D
NCU00753	Q7SDS0	Q7SDS0_NEUCR	Uncharacterized protein	NCU00753	Neurospora crassa (strain ATCC 24698 / 74-OR23-1A / CBS 708.71 / DSM 1257 / FGSC 987)	444				PF11578;		PTHR37315;	UPI0003CB5CCB
NCU00768	Q7SFW1	Q7SFW1_NEUCR	mRNA binding post-transcriptional regulator	NCU00768	Neurospora crassa (strain ATCC 24698 / 74-OR23-1A / CBS 708.71 / DSM 1257 / FGSC 987)	391	cytosol [GO:0005829]; mRNA binding [GO:0003729]; mRNA splice site selection [GO:0006376]; mRNA splicing, via spliceosome [GO:0000398]		PS50102;	PF00076;	SM00360;		UPI0003CA6EF0
NCU00770	Q7SFV9	Q7SFV9_NEUCR	Uncharacterized protein	NCU00770	Neurospora crassa (strain ATCC 24698 / 74-OR23-1A / CBS 708.71 / DSM 1257 / FGSC 987)	1845	protein-containing complex scaffold activity [GO:0032947]; proteasome assembly [GO:0043248]			PF13001;		PTHR23346:SF19;	UPI00001897C7
NCU00771	Q7SFV8	Q7SFV8_NEUCR	UBX domain-containing protein 7	NCU00771	Neurospora crassa (strain ATCC 24698 / 74-OR23-1A / CBS 708.71 / DSM 1257 / FGSC 987)	565			PS50033;	PF00789;	SM00594;		UPI0003CB45A1
NCU00775	Q7SFV4	Q7SFV4_NEUCR	Isocitrate dehydrogenase [NAD] subunit, mitochondrial	tca-6 NCU00775	Neurospora crassa (strain ATCC 24698 / 74-OR23-1A / CBS 708.71 / DSM 1257 / FGSC 987)	385	mitochondrial isocitrate dehydrogenase complex (NAD+) [GO:0005962]; mitochondrial nucleoid [GO:0042645]; isocitrate dehydrogenase (NAD+) activity [GO:0004449]; magnesium ion binding [GO:0000287]; NAD binding [GO:0051287]; isocitrate metabolic process [GO:0006102]; tricarboxylic acid cycle [GO:0006099]		PS00470;	PF00180;	SM01329;		UPI0000225C39
NCU00792	Q7SFT9	Q7SFT9_NEUCR	Branched-chain-amino-acid aminotransferase	NCU00792	Neurospora crassa (strain ATCC 24698 / 74-OR23-1A / CBS 708.71 / DSM 1257 / FGSC 987)	413	branched-chain-amino-acid transaminase activity [GO:0004084]; branched-chain amino acid metabolic process [GO:0009081]			PF01063;			UPI00001897DC
NCU00793	Q7SFT8	Q7SFT8_NEUCR	Trehalose phosphate synthase	NCU00793	Neurospora crassa (strain ATCC 24698 / 74-OR23-1A / CBS 708.71 / DSM 1257 / FGSC 987)	929	alpha,alpha-trehalose-phosphate synthase complex (UDP-forming) [GO:0005946]; cytoplasm [GO:0005737]; cytosol [GO:0005829]; catalytic activity [GO:0003824]; dephosphorylation [GO:0016311]; trehalose biosynthetic process [GO:0005992]; trehalose metabolism in response to stress [GO:0070413]			PF00982;PF02358;			UPI00015C3591
NCU00794	Q7SFT7	Q7SFT7_NEUCR	Ribosome biogenesis protein Rsa4	NCU00794	Neurospora crassa (strain ATCC 24698 / 74-OR23-1A / CBS 708.71 / DSM 1257 / FGSC 987)	517	nucleolus [GO:0005730]; ribosomal large subunit assembly [GO:0000027]		PS00678;PS50082;PS50294;	PF00400;	SM00320;		UPI00001897DE
NCU00798	Q7SFT3	Q7SFT3_NEUCR	Uncharacterized protein	NCU00798	Neurospora crassa (strain ATCC 24698 / 74-OR23-1A / CBS 708.71 / DSM 1257 / FGSC 987)	312							UPI00001897E2
NCU00799	Q7SFT2	Q7SFT2_NEUCR	Homocysteine S-methyltransferase	NCU00799	Neurospora crassa (strain ATCC 24698 / 74-OR23-1A / CBS 708.71 / DSM 1257 / FGSC 987)	361	metal ion binding [GO:0046872]; S-adenosylmethionine-homocysteine S-methyltransferase activity [GO:0008898]; methionine biosynthetic process [GO:0009086]; S-methylmethionine cycle [GO:0033528]		PS50970;	PF02574;			UPI00001897E3
NCU00805	Q7SCT7	Q7SCT7_NEUCR	BZIP transcription factor	NCU00805	Neurospora crassa (strain ATCC 24698 / 74-OR23-1A / CBS 708.71 / DSM 1257 / FGSC 987)	156				PF10224;		PTHR21614;	UPI00021D976A
NCU00812	Q7SEC2	Q7SEC2_NEUCR	Exosome complex exonuclease RRP41	NCU00812	Neurospora crassa (strain ATCC 24698 / 74-OR23-1A / CBS 708.71 / DSM 1257 / FGSC 987)	273	cytoplasmic exosome (RNase complex) [GO:0000177]; nuclear exosome (RNase complex) [GO:0000176]; nucleolus [GO:0005730]; exonuclease activity [GO:0004527]; nuclear mRNA surveillance [GO:0071028]; nuclear-transcribed mRNA catabolic process, exonucleolytic, 3'-5' [GO:0034427]; polyadenylation-dependent snoRNA 3'-end processing [GO:0071051]; rRNA catabolic process [GO:0016075]; U4 snRNA 3'-end proces…			PF01138;			UPI00001899EF
NCU00813	Q7SEC1	Q7SEC1_NEUCR	Disulfide isomerase	NCU00813	Neurospora crassa (strain ATCC 24698 / 74-OR23-1A / CBS 708.71 / DSM 1257 / FGSC 987)	504	cell [GO:0005623]; isomerase activity [GO:0016853]; cell redox homeostasis [GO:0045454]		PS00194;PS51352;	PF00085;			UPI00001899F0
NCU00814	Q7SEC0	Q7SEC0_NEUCR	Uncharacterized protein	NCU00814	Neurospora crassa (strain ATCC 24698 / 74-OR23-1A / CBS 708.71 / DSM 1257 / FGSC 987)	430				PF04652;			UPI0003CB3025
NCU00819	Q7SEB5	Q7SEB5_NEUCR	Uncharacterized protein	NCU00819	Neurospora crassa (strain ATCC 24698 / 74-OR23-1A / CBS 708.71 / DSM 1257 / FGSC 987)	187							UPI00015C35F1
NCU00823	Q7SEB1	Q7SEB1_NEUCR	26S proteasome regulatory subunit RPN11	rpn-11 NCU00823	Neurospora crassa (strain ATCC 24698 / 74-OR23-1A / CBS 708.71 / DSM 1257 / FGSC 987)	338	proteasome regulatory particle, lid subcomplex [GO:0008541]; metallopeptidase activity [GO:0008237]; proteasome binding [GO:0070628]; thiol-dependent ubiquitin-specific protease activity [GO:0004843]; proteasome-mediated ubiquitin-dependent protein catabolic process [GO:0043161]; protein deubiquitination [GO:0016579]		PS50249;	PF01398;PF13012;	SM00232;		UPI00015C35F3
NCU00824	Q7SEB0	Q7SEB0_NEUCR	Histone deacetylase (EC 3.5.1.98)	hda-3 NCU00824	Neurospora crassa (strain ATCC 24698 / 74-OR23-1A / CBS 708.71 / DSM 1257 / FGSC 987)	658	histone deacetylase complex [GO:0000118]; Sin3-type complex [GO:0070822]; histone deacetylase activity [GO:0004407]; NAD-dependent histone deacetylase activity (H3-K14 specific) [GO:0032041]; histone H3 deacetylation [GO:0070932]; histone H4 deacetylation [GO:0070933]; positive regulation of transcription by RNA polymerase II [GO:0045944]			PF00850;		PTHR10625;	UPI0003CAC512
NCU00831	V5IQ13	V5IQ13_NEUCR	Extracellular serine carboxypeptidase, variant	scp NCU00831	Neurospora crassa (strain ATCC 24698 / 74-OR23-1A / CBS 708.71 / DSM 1257 / FGSC 987)	561	carboxypeptidase activity [GO:0004180]; dipeptidyl-peptidase activity [GO:0008239]; serine-type peptidase activity [GO:0008236]; proteolysis [GO:0006508]			PF05577;			UPI0000189A02
NCU00843	Q7SD96	Q7SD96_NEUCR	Phosphoribosylglycinamide formyltransferase	ad-9 NCU00843	Neurospora crassa (strain ATCC 24698 / 74-OR23-1A / CBS 708.71 / DSM 1257 / FGSC 987)	231	phosphoribosylglycinamide formyltransferase activity [GO:0004644]; 'de novo' IMP biosynthetic process [GO:0006189]			PF00551;			UPI0000189B6D
NCU00846	Q7SD93	Q7SD93_NEUCR	Uncharacterized protein	NCU00846	Neurospora crassa (strain ATCC 24698 / 74-OR23-1A / CBS 708.71 / DSM 1257 / FGSC 987)	814							UPI0000189B70
NCU00847	Q7SD92	Q7SD92_NEUCR	Uncharacterized protein	NCU00847	Neurospora crassa (strain ATCC 24698 / 74-OR23-1A / CBS 708.71 / DSM 1257 / FGSC 987)	355							UPI0003CB5F6C
NCU00864	Q7SFG7	Q7SFG7_NEUCR	TIM-barrel enzyme family protein	NCU00864	Neurospora crassa (strain ATCC 24698 / 74-OR23-1A / CBS 708.71 / DSM 1257 / FGSC 987)	283	catalytic activity [GO:0003824]			PF09370;			UPI0000189859
NCU00867	Q7SFG4	Q7SFG4_NEUCR	Uncharacterized protein	NCU00867	Neurospora crassa (strain ATCC 24698 / 74-OR23-1A / CBS 708.71 / DSM 1257 / FGSC 987)	303				PF01814;			UPI0003CA7E0B
NCU00879	V5IQ04	V5IQ04_NEUCR	WD domain-containing protein, variant	NCU00879	Neurospora crassa (strain ATCC 24698 / 74-OR23-1A / CBS 708.71 / DSM 1257 / FGSC 987)	352			PS00678;PS50082;PS50294;	PF00400;	SM00320;		UPI0000189868
NCU00880	Q7SFF1	Q7SFF1_NEUCR	Phospholipase A-2-activating protein	NCU00880	Neurospora crassa (strain ATCC 24698 / 74-OR23-1A / CBS 708.71 / DSM 1257 / FGSC 987)	809	cytoplasm [GO:0005737]; nucleus [GO:0005634]; ubiquitin binding [GO:0043130]; proteasome-mediated ubiquitin-dependent protein catabolic process [GO:0043161]; ubiquitin recycling [GO:0010992]		PS51394;PS51396;PS00678;PS50082;PS50294;	PF09070;PF08324;PF00400;	SM00320;	PTHR19849;	UPI0000189869
NCU00884	Q7SFE7	Q7SFE7_NEUCR	NAD dependent epimerase/dehydratase	NCU00884	Neurospora crassa (strain ATCC 24698 / 74-OR23-1A / CBS 708.71 / DSM 1257 / FGSC 987)	416	catalytic activity [GO:0003824]; coenzyme binding [GO:0050662]			PF01370;			UPI000018986D
NCU00891	Q7SFE0	Q7SFE0_NEUCR	Xylitol dehydrogenase	NCU00891	Neurospora crassa (strain ATCC 24698 / 74-OR23-1A / CBS 708.71 / DSM 1257 / FGSC 987)	383	oxidoreductase activity [GO:0016491]; zinc ion binding [GO:0008270]		PS00059;	PF08240;PF00107;	SM00829;		UPI0000189874
NCU00892	O13492	FOLE_NEUCR	Folylpolyglutamate synthase (EC 6.3.2.17) (Folylpoly-gamma-glutamate synthetase) (FPGS) (Tetrahydrofolylpolyglutamate synthase) (Tetrahydrofolate synthase)	met-6 B13C5.220 NCU00892	Neurospora crassa (strain ATCC 24698 / 74-OR23-1A / CBS 708.71 / DSM 1257 / FGSC 987)	528	cytoplasm [GO:0005737]; mitochondrial inner membrane [GO:0005743]; mitochondrial matrix [GO:0005759]; ATP binding [GO:0005524]; metal ion binding [GO:0046872]; tetrahydrofolylpolyglutamate synthase activity [GO:0004326]; one-carbon metabolic process [GO:0006730]		PS01011;PS01012;			PTHR11136;	UPI0000189875
NCU00894	Q7SFD8	MIC60_NEUCR	MICOS complex subunit mic60 (Mitofilin)	mic60 B13C5.200 NCU00894	Neurospora crassa (strain ATCC 24698 / 74-OR23-1A / CBS 708.71 / DSM 1257 / FGSC 987)	672	integral component of membrane [GO:0016021]; mitochondrial inner membrane [GO:0005743]			PF09731;		PTHR15415;	UPI0000189877
NCU00895	Q7SFD7	Q7SFD7_NEUCR	RAB GTPase Ypt5	NCU00895	Neurospora crassa (strain ATCC 24698 / 74-OR23-1A / CBS 708.71 / DSM 1257 / FGSC 987)	220	early endosome membrane [GO:0031901]; GTP binding [GO:0005525]; GTPase activity [GO:0003924]; endosomal vesicle fusion [GO:0034058]; intracellular protein transport [GO:0006886]; Rab protein signal transduction [GO:0032482]			PF00071;			UPI0000189878
NCU00896	Q7SFD6	Q7SFD6_NEUCR	Synaptojanin-1	dot NCU00896	Neurospora crassa (strain ATCC 24698 / 74-OR23-1A / CBS 708.71 / DSM 1257 / FGSC 987)	707	endoplasmic reticulum [GO:0005783]; integral component of membrane [GO:0016021]; phosphatidylinositol-4-phosphate phosphatase activity [GO:0043812]; phosphatidylinositol dephosphorylation [GO:0046856]		PS50275;	PF02383;			UPI00021DAA12
NCU00900	Q7SCV4	Q7SCV4_NEUCR	Uncharacterized protein	NCU00900	Neurospora crassa (strain ATCC 24698 / 74-OR23-1A / CBS 708.71 / DSM 1257 / FGSC 987)	607	cytoplasm [GO:0005737]; nucleus [GO:0005634]; protein phosphatase 4 complex [GO:0030289]; protein phosphatase regulator activity [GO:0019888]; protein dephosphorylation [GO:0006470]			PF09184;		PTHR16487;	UPI0003CB682B
NCU00903	Q7SCV3	Q7SCV3_NEUCR	Uncharacterized protein	NCU00903	Neurospora crassa (strain ATCC 24698 / 74-OR23-1A / CBS 708.71 / DSM 1257 / FGSC 987)	350							UPI0003CB255F
NCU00904	Q7SCV2	Q7SCV2_NEUCR	D-lactate dehydrogenase	NCU00904	Neurospora crassa (strain ATCC 24698 / 74-OR23-1A / CBS 708.71 / DSM 1257 / FGSC 987)	595	integral component of membrane [GO:0016021]; mitochondrion [GO:0005739]; D-lactate dehydrogenase (cytochrome) activity [GO:0004458]; D-lactate dehydrogenase activity [GO:0008720]; FAD binding [GO:0071949]; flavin adenine dinucleotide binding [GO:0050660]; lactate catabolic process [GO:1903457]		PS51387;	PF02913;PF01565;			UPI0000189C00
NCU00905	Q7SCV1	Q7SCV1_NEUCR	N-acylethanolamine amidohydrolase	NCU00905	Neurospora crassa (strain ATCC 24698 / 74-OR23-1A / CBS 708.71 / DSM 1257 / FGSC 987)	610	amidase activity [GO:0004040]			PF01425;		PTHR11895;	UPI0000189C01
NCU00914	V5IQZ8	V5IQZ8_NEUCR	Serine/threonine protein kinase	stk-16 NCU00914	Neurospora crassa (strain ATCC 24698 / 74-OR23-1A / CBS 708.71 / DSM 1257 / FGSC 987)	1168	cell cortex [GO:0005938]; cytoplasm [GO:0005737]; nucleus [GO:0005634]; ATP binding [GO:0005524]; protein serine/threonine kinase activity [GO:0004674]; intracellular signal transduction [GO:0035556]; protein phosphorylation [GO:0006468]		PS00107;PS50011;PS00108;	PF00069;	SM00220;		UPI000018987C
NCU00914	V5IRB0	V5IRB0_NEUCR	Serine/threonine protein kinase, variant	stk-16 NCU00914	Neurospora crassa (strain ATCC 24698 / 74-OR23-1A / CBS 708.71 / DSM 1257 / FGSC 987)	1151	ATP binding [GO:0005524]; protein serine/threonine kinase activity [GO:0004674]		PS00107;PS50011;PS00108;	PF00069;	SM00220;		UPI0003CB5411
NCU00915	Q7SFD2	Q7SFD2_NEUCR	Aspartyl-tRNA synthetase	NCU00915	Neurospora crassa (strain ATCC 24698 / 74-OR23-1A / CBS 708.71 / DSM 1257 / FGSC 987)	594	aminoacyl-tRNA synthetase multienzyme complex [GO:0017101]; cytosol [GO:0005829]; nucleus [GO:0005634]; aspartate-tRNA ligase activity [GO:0004815]; ATP binding [GO:0005524]; RNA binding [GO:0003723]; aspartyl-tRNA aminoacylation [GO:0006422]		PS50862;	PF00152;PF01336;		PTHR43450;	UPI000018987D
NCU00919	Q7SFC8	ROK1_NEUCR	ATP-dependent RNA helicase rok1 (EC 3.6.4.13) (DEAD box RNA helicase 16)	drh-16 rok1 G17B7.140 NCU00919	Neurospora crassa (strain ATCC 24698 / 74-OR23-1A / CBS 708.71 / DSM 1257 / FGSC 987)	781	nucleolus [GO:0005730]; ATP binding [GO:0005524]; hydrolase activity [GO:0016787]; RNA binding [GO:0003723]; rRNA processing [GO:0006364]		PS51192;PS51194;PS51195;	PF00270;PF00271;	SM00487;SM00490;		UPI0000189881
NCU00920	Q7SFC7	Q7SFC7_NEUCR	Isoleucyl-tRNA synthetase	NCU00920	Neurospora crassa (strain ATCC 24698 / 74-OR23-1A / CBS 708.71 / DSM 1257 / FGSC 987)	962	mitochondrion [GO:0005739]; aminoacyl-tRNA editing activity [GO:0002161]; ATP binding [GO:0005524]; isoleucine-tRNA ligase activity [GO:0004822]; tRNA binding [GO:0000049]; isoleucyl-tRNA aminoacylation [GO:0006428]; mitochondrial translation [GO:0032543]		PS00178;	PF08264;PF00133;			UPI00015C373D
NCU00924	Q7SFC3	Q7SFC3_NEUCR	Glycosylphosphatidylinositol transamidase 2	gpit-2 NCU00924	Neurospora crassa (strain ATCC 24698 / 74-OR23-1A / CBS 708.71 / DSM 1257 / FGSC 987)	427	GPI-anchor transamidase complex [GO:0042765]; attachment of GPI anchor to protein [GO:0016255]; protein localization to cell surface [GO:0034394]			PF06728;		PTHR13121;	UPI0000189886
NCU00925	Q7SFC2	PESC_NEUCR	Pescadillo homolog (Nucleolar protein 7 homolog)	nop7 G17B7.070 NCU00925	Neurospora crassa (strain ATCC 24698 / 74-OR23-1A / CBS 708.71 / DSM 1257 / FGSC 987)	663	nucleoplasm [GO:0005654]; PeBoW complex [GO:0070545]; preribosome, large subunit precursor [GO:0030687]; ribonucleoprotein complex binding [GO:0043021]; maturation of 5.8S rRNA from tricistronic rRNA transcript (SSU-rRNA, 5.8S rRNA, LSU-rRNA) [GO:0000466]; maturation of LSU-rRNA from tricistronic rRNA transcript (SSU-rRNA, 5.8S rRNA, LSU-rRNA) [GO:0000463]		PS50172;	PF06732;		PTHR12221;	UPI0000189887
NCU00930	Q9C0N3	TIM10_NEUCR	Mitochondrial import inner membrane translocase subunit tim10	tim10 G17B7.020 NCU00930	Neurospora crassa (strain ATCC 24698 / 74-OR23-1A / CBS 708.71 / DSM 1257 / FGSC 987)	90	mitochondrial inner membrane [GO:0005743]; mitochondrial intermembrane space protein transporter complex [GO:0042719]; TIM22 mitochondrial import inner membrane insertion complex [GO:0042721]; metal ion binding [GO:0046872]; protein transporter activity [GO:0008565]; protein import into mitochondrial inner membrane [GO:0045039]			PF02953;		PTHR11038;PTHR11038:SF16;	UPI00000698C9
NCU00931	V5IQZ1	V5IQZ1_NEUCR	Lysyl-tRNA synthetase, variant	NCU00931	Neurospora crassa (strain ATCC 24698 / 74-OR23-1A / CBS 708.71 / DSM 1257 / FGSC 987)	601	cytoplasm [GO:0005737]; ATP binding [GO:0005524]; lysine-tRNA ligase activity [GO:0004824]; nucleic acid binding [GO:0003676]; lysyl-tRNA aminoacylation [GO:0006430]		PS50862;	PF00152;PF01336;			UPI0003CA7662
NCU00931	V5IRA4	V5IRA4_NEUCR	Lysyl-tRNA synthetase	NCU00931	Neurospora crassa (strain ATCC 24698 / 74-OR23-1A / CBS 708.71 / DSM 1257 / FGSC 987)	609	mitochondrion [GO:0005739]; ATP binding [GO:0005524]; lysine-tRNA ligase activity [GO:0004824]; tRNA binding [GO:0000049]; lysyl-tRNA aminoacylation [GO:0006430]; mitochondrial lysyl-tRNA aminoacylation [GO:0070154]		PS50862;	PF00152;PF01336;			UPI0003CA0E14
NCU00935	Q7SFB2	Q7SFB2_NEUCR	Uncharacterized protein	NCU00935	Neurospora crassa (strain ATCC 24698 / 74-OR23-1A / CBS 708.71 / DSM 1257 / FGSC 987)	581			PS50003;	PF15406;		PTHR42073;	UPI0000189890
NCU00936	V5IPY2	V5IPY2_NEUCR	Succinate semialdehyde dehydrogenase, variant 2	NCU00936	Neurospora crassa (strain ATCC 24698 / 74-OR23-1A / CBS 708.71 / DSM 1257 / FGSC 987)	496	succinate-semialdehyde dehydrogenase [NAD(P)+] activity [GO:0009013]; gamma-aminobutyric acid catabolic process [GO:0009450]		PS00070;PS00687;	PF00171;			UPI00015C376B
NCU00936	V5IQD0	V5IQD0_NEUCR	Succinate semialdehyde dehydrogenase, variant 1	NCU00936	Neurospora crassa (strain ATCC 24698 / 74-OR23-1A / CBS 708.71 / DSM 1257 / FGSC 987)	536	succinate-semialdehyde dehydrogenase (NAD+) activity [GO:0004777]; succinate-semialdehyde dehydrogenase [NAD(P)+] activity [GO:0009013]; gamma-aminobutyric acid catabolic process [GO:0009450]		PS00070;PS00687;	PF00171;			UPI0003CBD8B3
NCU00939	Q7SFA8	Q7SFA8_NEUCR	Development and carotenogenesis control-1 protein	dcc-1 NCU00939	Neurospora crassa (strain ATCC 24698 / 74-OR23-1A / CBS 708.71 / DSM 1257 / FGSC 987)	1542	phosphorelay sensor kinase activity [GO:0000155]; negative regulation of conidium formation [GO:0075308]; regulation of transcription, DNA-templated [GO:0006355]		PS50109;PS50113;PS50110;	PF02518;PF00512;PF00989;PF00072;	SM00387;SM00388;SM00448;		UPI0000189894
NCU00951	Q6MVH7	IPYR_NEUCR	Inorganic pyrophosphatase (EC 3.6.1.1) (Pyrophosphate phospho-hydrolase) (PPase)	ipp-1 B20J13.020 NCU00951	Neurospora crassa (strain ATCC 24698 / 74-OR23-1A / CBS 708.71 / DSM 1257 / FGSC 987)	290	cytoplasm [GO:0005737]; extracellular region [GO:0005576]; inorganic diphosphatase activity [GO:0004427]; magnesium ion binding [GO:0000287]; phosphate-containing compound metabolic process [GO:0006796]		PS00387;	PF00719;		PTHR10286;	UPI00002246E9
NCU00952	Q7SGH0	Q7SGH0_NEUCR	Mitochondrial ribosomal protein L44	NCU00952	Neurospora crassa (strain ATCC 24698 / 74-OR23-1A / CBS 708.71 / DSM 1257 / FGSC 987)	98	mitochondrial large ribosomal subunit [GO:0005762]; structural constituent of ribosome [GO:0003735]			PF10780;			UPI00001896F1
NCU00954	Q7SGG8	PPME1_NEUCR	Protein phosphatase methylesterase 1 (PME-1) (EC 3.1.1.89) (Pectin methylesterase 1)	pme-1 ppe1 B20J13.050 NCU00954	Neurospora crassa (strain ATCC 24698 / 74-OR23-1A / CBS 708.71 / DSM 1257 / FGSC 987)	454	protein methylesterase activity [GO:0051723]; protein demethylation [GO:0006482]			PF12697;		PTHR14189;	UPI00001896F3
NCU00957	Q7SGG5	Q7SGG5_NEUCR	Anchored cell wall protein 2	acw-2 NCU00957	Neurospora crassa (strain ATCC 24698 / 74-OR23-1A / CBS 708.71 / DSM 1257 / FGSC 987)	215				PF10342;			UPI00001896F6
NCU00958	Q7SGG4	Q7SGG4_NEUCR	5-azacytidine resistance protein azr1	NCU00958	Neurospora crassa (strain ATCC 24698 / 74-OR23-1A / CBS 708.71 / DSM 1257 / FGSC 987)	458	mitochondrion [GO:0005739]; catalytic activity [GO:0003824]		PS51746;	PF07228;	SM00331;SM00332;	PTHR12320;	UPI00001896F7
NCU00959	V5IQY5	V5IQY5_NEUCR	Succinate dehydrogenase [ubiquinone] iron-sulfur subunit, mitochondrial (EC 1.3.5.1)	tca-10 NCU00959	Neurospora crassa (strain ATCC 24698 / 74-OR23-1A / CBS 708.71 / DSM 1257 / FGSC 987)	282	mitochondrial inner membrane [GO:0005743]; mitochondrial membrane [GO:0031966]; 2 iron, 2 sulfur cluster binding [GO:0051537]; 3 iron, 4 sulfur cluster binding [GO:0051538]; 4 iron, 4 sulfur cluster binding [GO:0051539]; electron transfer activity [GO:0009055]; metal ion binding [GO:0046872]; succinate dehydrogenase (ubiquinone) activity [GO:0008177]; aerobic respiration [GO:0009060]; respiratory…		PS00197;PS51085;PS00198;PS51379;	PF13085;			UPI00001896F8
NCU00959	V5IRP1	V5IRP1_NEUCR	Succinate dehydrogenase iron-sulfur protein, variant	tca-10 NCU00959	Neurospora crassa (strain ATCC 24698 / 74-OR23-1A / CBS 708.71 / DSM 1257 / FGSC 987)	251	2 iron, 2 sulfur cluster binding [GO:0051537]; electron transfer activity [GO:0009055]; tricarboxylic acid cycle [GO:0006099]		PS00197;PS51085;	PF13085;			UPI0003CA1774
NCU00963	V5IRP0	V5IRP0_NEUCR	Methylenetetrahydrofolate dehydrogenase, variant	NCU00963	Neurospora crassa (strain ATCC 24698 / 74-OR23-1A / CBS 708.71 / DSM 1257 / FGSC 987)	342	cytosol [GO:0005829]; methylenetetrahydrofolate dehydrogenase (NAD+) activity [GO:0004487]; methylenetetrahydrofolate dehydrogenase (NADP+) activity [GO:0004488]; purine nucleobase biosynthetic process [GO:0009113]			PF00763;PF02882;		PTHR10025;	UPI00001896FC
NCU00964	Q7SGF8	Q7SGF8_NEUCR	Uncharacterized protein	NCU00964	Neurospora crassa (strain ATCC 24698 / 74-OR23-1A / CBS 708.71 / DSM 1257 / FGSC 987)	1164	protein maturation by iron-sulfur cluster transfer [GO:0097428]			PF12460;PF14500;		PTHR12891;	UPI00001896FD
NCU00965	Q7SGF7	Q7SGF7_NEUCR	Uncharacterized protein	NCU00965	Neurospora crassa (strain ATCC 24698 / 74-OR23-1A / CBS 708.71 / DSM 1257 / FGSC 987)	245	integral component of membrane [GO:0016021]; signal peptidase complex [GO:0005787]; peptidase activity [GO:0008233]; protein targeting to ER [GO:0045047]; signal peptide processing [GO:0006465]			PF06703;		PTHR13085;	UPI00001896FE
NCU00966	Q7SGF6	Q7SGF6_NEUCR	ER membrane protein complex subunit 3	NCU00966	Neurospora crassa (strain ATCC 24698 / 74-OR23-1A / CBS 708.71 / DSM 1257 / FGSC 987)	259	ER membrane protein complex [GO:0072546]; protein folding in endoplasmic reticulum [GO:0034975]			PF01956;	SM01415;	PTHR13116;	UPI00001896FF
NCU00967	Q7SGF5	Q7SGF5_NEUCR	Uncharacterized protein	NCU00967	Neurospora crassa (strain ATCC 24698 / 74-OR23-1A / CBS 708.71 / DSM 1257 / FGSC 987)	641	nucleus [GO:0005634]; metal ion binding [GO:0046872]; snoRNA binding [GO:0030515]; box C/D snoRNP assembly [GO:0000492]		PS50103;	PF10453;		PTHR13309;	UPI0000189700
NCU00968	V5IR97	V5IR97_NEUCR	SIL1, variant 2	NCU00968	Neurospora crassa (strain ATCC 24698 / 74-OR23-1A / CBS 708.71 / DSM 1257 / FGSC 987)	500	cytoplasm [GO:0005737]; endoplasmic reticulum [GO:0005783]; adenyl-nucleotide exchange factor activity [GO:0000774]						UPI0000189701
NCU00969	P42116	NURM_NEUCR	NADH-ubiquinone oxidoreductase 17.8 kDa subunit, mitochondrial (EC 1.6.99.3) (EC 7.1.1.2) (Complex I-17.8kD) (CI-17.8kD)	nuo17.8 B20J13.200 NCU00969	Neurospora crassa (strain ATCC 24698 / 74-OR23-1A / CBS 708.71 / DSM 1257 / FGSC 987)	186	integral component of membrane [GO:0016021]; mitochondrial inner membrane [GO:0005743]; NADH dehydrogenase activity [GO:0003954]					PTHR42100;	UPI0000130A34
NCU00971	Q7SGF1	Q7SGF1_NEUCR	Ribosomal protein S12	NCU00971	Neurospora crassa (strain ATCC 24698 / 74-OR23-1A / CBS 708.71 / DSM 1257 / FGSC 987)	152	cytosolic small ribosomal subunit [GO:0022627]; RNA binding [GO:0003723]; structural constituent of ribosome [GO:0003735]; ribosomal small subunit assembly [GO:0000028]; translation [GO:0006412]		PS00323;	PF00203;		PTHR11880;	UPI0000189703
NCU00977	Q7SGE5	Q7SGE5_NEUCR	Aconitate hydratase	NCU00977	Neurospora crassa (strain ATCC 24698 / 74-OR23-1A / CBS 708.71 / DSM 1257 / FGSC 987)	217	mitochondrial large ribosomal subunit [GO:0005762]; structural constituent of ribosome [GO:0003735]			PF00829;		PTHR21349;	UPI0000189709
NCU00979	Q7SGE3	Q7SGE3_NEUCR	60S acidic ribosomal protein P2	NCU00979	Neurospora crassa (strain ATCC 24698 / 74-OR23-1A / CBS 708.71 / DSM 1257 / FGSC 987)	110	ribosome [GO:0005840]; structural constituent of ribosome [GO:0003735]; translational elongation [GO:0006414]						UPI000018970B
NCU00981	Q7SGE1	NSA2_NEUCR	Ribosome biogenesis protein nsa2	rbg-52 nsa2 B20J13.320 NCU00981	Neurospora crassa (strain ATCC 24698 / 74-OR23-1A / CBS 708.71 / DSM 1257 / FGSC 987)	261	nucleolus [GO:0005730]; preribosome, large subunit precursor [GO:0030687]; maturation of 5.8S rRNA from tricistronic rRNA transcript (SSU-rRNA, 5.8S rRNA, LSU-rRNA) [GO:0000466]; maturation of LSU-rRNA from tricistronic rRNA transcript (SSU-rRNA, 5.8S rRNA, LSU-rRNA) [GO:0000463]			PF01201;		PTHR12642;	UPI000018970D
NCU00995	Q7SD29	Q7SD29_NEUCR	Uncharacterized protein	NCU00995	Neurospora crassa (strain ATCC 24698 / 74-OR23-1A / CBS 708.71 / DSM 1257 / FGSC 987)	139							UPI0000189BB0
NCU01001	Q1K8E4	Q1K8E4_NEUCR	Uncharacterized protein	NCU01001	Neurospora crassa (strain ATCC 24698 / 74-OR23-1A / CBS 708.71 / DSM 1257 / FGSC 987)	89				PF09495;			UPI000000D1CF
NCU01002	Q1K8E3	Q1K8E3_NEUCR	Coatomer subunit epsilon	NCU01002	Neurospora crassa (strain ATCC 24698 / 74-OR23-1A / CBS 708.71 / DSM 1257 / FGSC 987)	296	COPI vesicle coat [GO:0030126]; Golgi membrane [GO:0000139]; structural molecule activity [GO:0005198]; endoplasmic reticulum to Golgi vesicle-mediated transport [GO:0006888]; intra-Golgi vesicle-mediated transport [GO:0006891]; protein transport [GO:0015031]; retrograde vesicle-mediated transport, Golgi to endoplasmic reticulum [GO:0006890]					PTHR10805;	UPI000000D1CE
NCU01004	Q1K8E2	Q1K8E2_NEUCR	Phosphatidylserine decarboxylase proenzyme 2 (EC 4.1.1.65) [Cleaved into: Phosphatidylserine decarboxylase 2 beta chain; Phosphatidylserine decarboxylase 2 alpha chain]	PSD2 NCU01004	Neurospora crassa (strain ATCC 24698 / 74-OR23-1A / CBS 708.71 / DSM 1257 / FGSC 987)	1062	endosome membrane [GO:0010008]; Golgi membrane [GO:0000139]; Golgi stack [GO:0005795]; calcium ion binding [GO:0005509]; phosphatidylserine decarboxylase activity [GO:0004609]; phosphatidylethanolamine biosynthetic process [GO:0006646]; protein autoprocessing [GO:0016540]		PS50004;PS00018;PS50222;	PF00168;PF02666;	SM00239;	PTHR10067;	UPI000000D1CC
NCU01006	O42637	CIA84_NEUCR	Complex I intermediate-associated protein 84, mitochondrial	cia84 cia80 B11O8.100 NCU01006	Neurospora crassa (strain ATCC 24698 / 74-OR23-1A / CBS 708.71 / DSM 1257 / FGSC 987)	797	mitochondrion [GO:0005739]						UPI000000D1CA
NCU01007	Q1K8E0	Q1K8E0_NEUCR	Mito ribosomal protein S18	NCU01007	Neurospora crassa (strain ATCC 24698 / 74-OR23-1A / CBS 708.71 / DSM 1257 / FGSC 987)	256	mitochondrial small ribosomal subunit [GO:0005763]; small ribosomal subunit rRNA binding [GO:0070181]; structural constituent of ribosome [GO:0003735]; translation [GO:0006412]			PF01084;			UPI000000D1C9
NCU01013	Q7S819	Q7S819_NEUCR	Delta-aminolevulinic acid dehydratase (EC 4.2.1.24)	NCU01013	Neurospora crassa (strain ATCC 24698 / 74-OR23-1A / CBS 708.71 / DSM 1257 / FGSC 987)	385	cytosol [GO:0005829]; porphobilinogen synthase activity [GO:0004655]; zinc ion binding [GO:0008270]; heme biosynthetic process [GO:0006783]		PS00169;	PF00490;	SM01004;	PTHR11458;	UPI000018A2C8
NCU01021	Q9P748	EIF3F_NEUCR	Eukaryotic translation initiation factor 3 subunit F (eIF3f)	1A9.200 NCU01021	Neurospora crassa (strain ATCC 24698 / 74-OR23-1A / CBS 708.71 / DSM 1257 / FGSC 987)	369	eukaryotic 43S preinitiation complex [GO:0016282]; eukaryotic 48S preinitiation complex [GO:0033290]; eukaryotic translation initiation factor 3 complex, eIF3e [GO:0071540]; eukaryotic translation initiation factor 3 complex, eIF3m [GO:0071541]; translation initiation factor activity [GO:0003743]; translation initiation factor binding [GO:0031369]; formation of cytoplasmic translation initiation …		PS50249;	PF01398;PF13012;	SM00232;	PTHR10540:SF6;	UPI000006C549
NCU01022	Q9P749	UTP25_NEUCR	U3 small nucleolar RNA-associated protein 25 (U3 snoRNA-associated protein 25) (U three protein 25)	utp25 1A9.190 NCU01022	Neurospora crassa (strain ATCC 24698 / 74-OR23-1A / CBS 708.71 / DSM 1257 / FGSC 987)	751	nucleolus [GO:0005730]; small-subunit processome [GO:0032040]; rRNA binding [GO:0019843]; U3 snoRNA binding [GO:0034511]; maturation of SSU-rRNA from tricistronic rRNA transcript (SSU-rRNA, 5.8S rRNA, LSU-rRNA) [GO:0000462]			PF06862;		PTHR12933;	UPI000006BACD
NCU01023	Q1K8C8	Q1K8C8_NEUCR	50S ribosomal protein L17	NCU01023	Neurospora crassa (strain ATCC 24698 / 74-OR23-1A / CBS 708.71 / DSM 1257 / FGSC 987)	193	mitochondrial large ribosomal subunit [GO:0005762]; structural constituent of ribosome [GO:0003735]; translation [GO:0006412]		PS01167;	PF01196;		PTHR14413;	UPI00015C3AE5
NCU01047	Q1K8B9	Q1K8B9_NEUCR	Uncharacterized protein	NCU01047	Neurospora crassa (strain ATCC 24698 / 74-OR23-1A / CBS 708.71 / DSM 1257 / FGSC 987)	1053	endoplasmic reticulum [GO:0005783]; phosphatidylinositol-4,5-bisphosphate 5-phosphatase activity [GO:0004439]; inositol phosphate dephosphorylation [GO:0046855]; phosphatidylinositol dephosphorylation [GO:0046856]				SM00128;		UPI000006B8D6
NCU01065	Q1K8A3	Q1K8A3_NEUCR	Ammonium transporter	NCU01065	Neurospora crassa (strain ATCC 24698 / 74-OR23-1A / CBS 708.71 / DSM 1257 / FGSC 987)	481	integral component of plasma membrane [GO:0005887]; ammonium transmembrane transporter activity [GO:0008519]; nitrogen utilization [GO:0019740]		PS01219;	PF00909;			UPI000006B26D
NCU01066	P23623	OXLA_NEUCR	L-amino-acid oxidase (LAAO) (LAO) (EC 1.4.3.2)	lox B14A6.230 NCU01066	Neurospora crassa (strain ATCC 24698 / 74-OR23-1A / CBS 708.71 / DSM 1257 / FGSC 987)	696	L-amino-acid oxidase activity [GO:0001716]; oxidoreductase activity [GO:0016491]; cellular amino acid catabolic process [GO:0009063]			PF01593;			UPI000006C7F5
NCU01069	Q7S814	Q7S814_NEUCR	Amphiphysin-like lipid raft protein	amph-1 NCU01069	Neurospora crassa (strain ATCC 24698 / 74-OR23-1A / CBS 708.71 / DSM 1257 / FGSC 987)	261	actin cortical patch [GO:0030479]; cell cortex of cell tip [GO:0051285]; mating projection [GO:0005937]; mating projection tip [GO:0043332]; medial cortex [GO:0031097]; Rvs161p-Rvs167p complex [GO:1990528]; cytoskeletal protein binding [GO:0008092]; actin cortical patch localization [GO:0051666]; actin filament organization [GO:0007015]; endocytosis [GO:0006897]; mitotic actomyosin contractile ri…		PS51021;	PF03114;	SM00721;		UPI0003CA45C0
NCU01081	Q1K891	Q1K891_NEUCR	Uncharacterized protein	NCU01081	Neurospora crassa (strain ATCC 24698 / 74-OR23-1A / CBS 708.71 / DSM 1257 / FGSC 987)	530			PS50181;				UPI000006BDA9
NCU01083	Q1K889	Q1K889_NEUCR	S-adenosylmethionine decarboxylase	spe-2 NCU01083	Neurospora crassa (strain ATCC 24698 / 74-OR23-1A / CBS 708.71 / DSM 1257 / FGSC 987)	503	cytosol [GO:0005829]; adenosylmethionine decarboxylase activity [GO:0004014]; spermidine biosynthetic process [GO:0008295]; spermine biosynthetic process [GO:0006597]		PS01336;	PF01536;		PTHR11570;	UPI000006AFD0
NCU01084	Q8X0F1	CFD1_NEUCR	Cytosolic Fe-S cluster assembly factor cfd1 (Cytosolic Fe-S cluster-deficient protein 1)	cfd1 B14A6.050 NCU01084	Neurospora crassa (strain ATCC 24698 / 74-OR23-1A / CBS 708.71 / DSM 1257 / FGSC 987)	304	cytosol [GO:0005829]; 4 iron, 4 sulfur cluster binding [GO:0051539]; ATP binding [GO:0005524]; iron-sulfur cluster binding [GO:0051536]; metal ion binding [GO:0046872]; iron-sulfur cluster assembly [GO:0016226]			PF10609;		PTHR23264;	UPI000006A6A7
NCU01092	Q1K883	Q1K883_NEUCR	3-oxoacyl-(Acyl-carrier-protein) reductase	NCU01092	Neurospora crassa (strain ATCC 24698 / 74-OR23-1A / CBS 708.71 / DSM 1257 / FGSC 987)	314	oxidoreductase activity [GO:0016491]		PS00061;				UPI000006BE60
NCU01099	Q1K878	Q1K878_NEUCR	GTP-binding protein GTR1	NCU01099	Neurospora crassa (strain ATCC 24698 / 74-OR23-1A / CBS 708.71 / DSM 1257 / FGSC 987)	409	EGO complex [GO:0034448]; fungal-type vacuole membrane [GO:0000329]; Gtr1-Gtr2 GTPase complex [GO:1990131]; lysosome [GO:0005764]; nucleus [GO:0005634]; GTP binding [GO:0005525]; GTPase activity [GO:0003924]; cellular response to amino acid stimulus [GO:0071230]; cellular response to nitrogen starvation [GO:0006995]; cellular response to starvation [GO:0009267]; negative regulation of TORC1 signa…			PF04670;		PTHR11259;	UPI000006C07C
NCU01100	Q1K877	Q1K877_NEUCR	Uncharacterized protein	NCU01100	Neurospora crassa (strain ATCC 24698 / 74-OR23-1A / CBS 708.71 / DSM 1257 / FGSC 987)	433	cytosol [GO:0005829]; ubiquitin binding [GO:0043130]; autophagosome assembly [GO:0000045]; Golgi organization [GO:0007030]; membrane fusion [GO:0061025]; nuclear envelope reassembly [GO:0031468]; proteasome-mediated ubiquitin-dependent protein catabolic process [GO:0043161]		PS51399;PS50033;	PF08059;PF00789;	SM00553;		UPI000006B894
NCU01102	Q7RVX1	Q7RVX1_NEUCR	Mitochondrial export translocase Oxa1	oxa-1 NCU01102	Neurospora crassa (strain ATCC 24698 / 74-OR23-1A / CBS 708.71 / DSM 1257 / FGSC 987)	462	integral component of membrane [GO:0016021]; membrane insertase activity [GO:0032977]			PF02096;		PTHR12428;	UPI000018A2D8
NCU01104	Q7S806	Q7S806_NEUCR	ATP-dependent RNA helicase MSS116	NCU01104	Neurospora crassa (strain ATCC 24698 / 74-OR23-1A / CBS 708.71 / DSM 1257 / FGSC 987)	696	ATP binding [GO:0005524]; helicase activity [GO:0004386]; nucleic acid binding [GO:0003676]		PS51192;PS51194;PS51195;	PF00270;PF00271;	SM00487;SM00490;		UPI0003CBD97A
NCU01106	Q1K874	Q1K874_NEUCR	L-amino acid oxidase	NCU01106	Neurospora crassa (strain ATCC 24698 / 74-OR23-1A / CBS 708.71 / DSM 1257 / FGSC 987)	649	L-amino-acid oxidase activity [GO:0001716]; oxidoreductase activity [GO:0016491]; cellular amino acid catabolic process [GO:0009063]			PF01593;			UPI000006A627
NCU01107	Q1K873	Q1K873_NEUCR	Short-chain dehydrogenase	NCU01107	Neurospora crassa (strain ATCC 24698 / 74-OR23-1A / CBS 708.71 / DSM 1257 / FGSC 987)	333				PF00106;			UPI000006B015
NCU01119	Q1K768	Q1K768_NEUCR	Terpene cyclase/mutase family member (EC 5.4.99.-)	NCU01119	Neurospora crassa (strain ATCC 24698 / 74-OR23-1A / CBS 708.71 / DSM 1257 / FGSC 987)	749	lipid droplet [GO:0005811]; lanosterol synthase activity [GO:0000250]; ergosterol biosynthetic process [GO:0006696]			PF13243;PF13249;			UPI00001789AF
NCU01121	Q1K766	Q1K766_NEUCR	Uncharacterized protein	NCU01121	Neurospora crassa (strain ATCC 24698 / 74-OR23-1A / CBS 708.71 / DSM 1257 / FGSC 987)	255			PS50297;PS50088;	PF12796;	SM00248;		UPI0003CA196A
NCU01142	V5IL87	V5IL87_NEUCR	NADH dehydrogenase [ubiquinone] 1 alpha subcomplex subunit	nuo13.4 NCU01142	Neurospora crassa (strain ATCC 24698 / 74-OR23-1A / CBS 708.71 / DSM 1257 / FGSC 987)	141	mitochondrial inner membrane [GO:0005743]; respirasome [GO:0070469]; electron transfer activity [GO:0009055]; NADH dehydrogenase (ubiquinone) activity [GO:0008137]			PF05071;		PTHR12910;	UPI0003CB5339
NCU01142	V5ILI8	V5ILI8_NEUCR	NADH dehydrogenase [ubiquinone] 1 alpha subcomplex subunit	nuo13.4 NCU01142	Neurospora crassa (strain ATCC 24698 / 74-OR23-1A / CBS 708.71 / DSM 1257 / FGSC 987)	216	mitochondrial respiratory chain complex I [GO:0005747]; electron transfer activity [GO:0009055]; NADH dehydrogenase (ubiquinone) activity [GO:0008137]; response to oxidative stress [GO:0006979]			PF05071;		PTHR12910;	UPI0003CB8424
NCU01143	F5HH60	F5HH60_NEUCR	DEAD/DEAH box helicase	NCU01143	Neurospora crassa (strain ATCC 24698 / 74-OR23-1A / CBS 708.71 / DSM 1257 / FGSC 987)	1391	ATP binding [GO:0005524]; ATP-dependent 3'-5' RNA helicase activity [GO:0034459]; RNA binding [GO:0003723]		PS00690;PS51192;PS51194;PS50030;	PF00270;PF04408;PF00271;PF07717;PF05773;	SM00487;SM00847;SM00490;		UPI000006C278
NCU01145	V5IM86	V5IM86_NEUCR	Uncharacterized protein	NCU01145	Neurospora crassa (strain ATCC 24698 / 74-OR23-1A / CBS 708.71 / DSM 1257 / FGSC 987)	168	chromatin [GO:0000785]; nucleus [GO:0005634]; DNA binding [GO:0003677]; regulation of transcription, DNA-templated [GO:0006355]			PF02178;	SM00384;		UPI0003CAEFE3
NCU01145	V5IMU8	V5IMU8_NEUCR	Uncharacterized protein	NCU01145	Neurospora crassa (strain ATCC 24698 / 74-OR23-1A / CBS 708.71 / DSM 1257 / FGSC 987)	205	chromatin [GO:0000785]; nucleus [GO:0005634]; DNA binding [GO:0003677]; DNA-(apurinic or apyrimidinic site) endonuclease activity [GO:0003906]; base-excision repair [GO:0006284]; regulation of transcription, DNA-templated [GO:0006355]			PF02178;	SM00384;		UPI0003CA83B5
NCU01146	Q1K756	Q1K756_NEUCR	Signal sequence receptor alpha chain	NCU01146	Neurospora crassa (strain ATCC 24698 / 74-OR23-1A / CBS 708.71 / DSM 1257 / FGSC 987)	272	endoplasmic reticulum [GO:0005783]; endoplasmic reticulum membrane [GO:0005789]; integral component of membrane [GO:0016021]			PF03896;			UPI0000069E85
NCU01147	F5HAE7	F5HAE7_NEUCR	Tyrosine decarboxylase	NCU01147	Neurospora crassa (strain ATCC 24698 / 74-OR23-1A / CBS 708.71 / DSM 1257 / FGSC 987)	557	carboxy-lyase activity [GO:0016831]; pyridoxal phosphate binding [GO:0030170]; carboxylic acid metabolic process [GO:0019752]			PF00282;			UPI000018A373
NCU01150	Q1K754	Q1K754_NEUCR	UBA domain-containing protein 3	NCU01150	Neurospora crassa (strain ATCC 24698 / 74-OR23-1A / CBS 708.71 / DSM 1257 / FGSC 987)	745	cytoplasm [GO:0005737]; GTPase activator activity [GO:0005096]; metal ion binding [GO:0046872]; endocytosis [GO:0006897]; endoplasmic reticulum to Golgi vesicle-mediated transport [GO:0006888]; intra-Golgi vesicle-mediated transport [GO:0006891]		PS50115;PS50030;	PF01412;	SM00105;		UPI000006C72F
NCU01157	Q8X0X0	GSH1_NEUCR	Glutamate--cysteine ligase (EC 6.3.2.2) (Gamma-ECS) (GCS) (Gamma-glutamylcysteine synthetase)	gcs-1 123A4.220 NCU01157	Neurospora crassa (strain ATCC 24698 / 74-OR23-1A / CBS 708.71 / DSM 1257 / FGSC 987)	728	glutamate-cysteine ligase complex [GO:0017109]; ATP binding [GO:0005524]; glutamate-cysteine ligase activity [GO:0004357]; glutathione biosynthetic process [GO:0006750]			PF03074;		PTHR11164;	UPI000012BBB5
NCU01160	Q8X0X2	DBP5_NEUCR	ATP-dependent RNA helicase dbp-5 (EC 3.6.4.13)	dbp-5 123A4.200 NCU01160	Neurospora crassa (strain ATCC 24698 / 74-OR23-1A / CBS 708.71 / DSM 1257 / FGSC 987)	483	cellular bud tip [GO:0005934]; cytoplasmic stress granule [GO:0010494]; nuclear membrane [GO:0031965]; nuclear pore cytoplasmic filaments [GO:0044614]; polysome [GO:0005844]; ATP binding [GO:0005524]; inositol hexakisphosphate binding [GO:0000822]; RNA binding [GO:0003723]; RNA helicase activity [GO:0003724]; RNA-dependent ATPase activity [GO:0008186]; poly(A)+ mRNA export from nucleus [GO:001697…		PS00039;PS51192;PS51194;PS51195;	PF00270;PF00271;	SM00487;SM00490;		UPI000006C054
NCU01163	Q1K867	Q1K867_NEUCR	GAF domain nucleotide-binding protein	NCU01163	Neurospora crassa (strain ATCC 24698 / 74-OR23-1A / CBS 708.71 / DSM 1257 / FGSC 987)	176	cytosol [GO:0005829]; methionine-R-sulfoxide reductase activity [GO:0070191]		PS01320;	PF13185;			UPI00021D741C
NCU01164	Q8X0X6	SPT16_NEUCR	FACT complex subunit ctc-2 (Chromatin transcription complex 2) (Facilitates chromatin transcription complex subunit ctc-2)	ctc-2 spt16 123A4.150 NCU01164	Neurospora crassa (strain ATCC 24698 / 74-OR23-1A / CBS 708.71 / DSM 1257 / FGSC 987)	1032	alpha DNA polymerase:primase complex [GO:0005658]; FACT complex [GO:0035101]; nuclear chromatin [GO:0000790]; replication fork protection complex [GO:0031298]; histone binding [GO:0042393]; nucleosome binding [GO:0031491]; chromatin remodeling [GO:0006338]; DNA repair [GO:0006281]; DNA replication-independent nucleosome organization [GO:0034724]; DNA-dependent DNA replication [GO:0006261]; nucleo…			PF14826;PF00557;PF08512;PF08644;	SM01285;SM01287;SM01286;	PTHR13980;	UPI000006A94D
NCU01166	Q01386	KAPR_NEUCR	cAMP-dependent protein kinase regulatory subunit (PKA regulatory subunit) (Microcycle blastoconidiation protein)	mcb 123A4.120 NCU01166	Neurospora crassa (strain ATCC 24698 / 74-OR23-1A / CBS 708.71 / DSM 1257 / FGSC 987)	385	cAMP-dependent protein kinase complex [GO:0005952]; cytosol [GO:0005829]; 3',5'-cyclic-GMP phosphodiesterase activity [GO:0047555]; cAMP binding [GO:0030552]; cAMP-dependent protein kinase regulator activity [GO:0008603]; cGMP-mediated signaling [GO:0019934]		PS00888;PS00889;PS50042;	PF00027;	SM00100;		UPI000012DC2C
NCU01167	Q1K864	Q1K864_NEUCR	Uncharacterized protein	NCU01167	Neurospora crassa (strain ATCC 24698 / 74-OR23-1A / CBS 708.71 / DSM 1257 / FGSC 987)	231	Prp19 complex [GO:0000974]; mRNA processing [GO:0006397]			PF05700;		PTHR13296;	UPI000006B8DC
NCU01169	P40915	NDUV2_NEUCR	NADH-ubiquinone oxidoreductase 24 kDa subunit, mitochondrial (EC 1.6.99.3) (EC 7.1.1.2)	nuo-24 123A4.080 NCU01169	Neurospora crassa (strain ATCC 24698 / 74-OR23-1A / CBS 708.71 / DSM 1257 / FGSC 987)	263	mitochondrial respiratory chain complex I [GO:0005747]; 2 iron, 2 sulfur cluster binding [GO:0051537]; metal ion binding [GO:0046872]; NADH dehydrogenase activity [GO:0003954]; mitochondrial electron transport, NADH to ubiquinone [GO:0006120]		PS01099;			PTHR10371;	UPI000013093C
NCU01170	Q1K863	Q1K863_NEUCR	Uncharacterized protein	NCU01170	Neurospora crassa (strain ATCC 24698 / 74-OR23-1A / CBS 708.71 / DSM 1257 / FGSC 987)	569	integral component of membrane [GO:0016021]; catalytic activity [GO:0003824]			PF00501;			UPI000006AB18
NCU01171	Q1K862	Q1K862_NEUCR	DNA helicase (EC 3.6.4.12)	NCU01171	Neurospora crassa (strain ATCC 24698 / 74-OR23-1A / CBS 708.71 / DSM 1257 / FGSC 987)	724	MCM complex [GO:0042555]; nucleus [GO:0005634]; ATP binding [GO:0005524]; DNA replication origin binding [GO:0003688]; helicase activity [GO:0004386]; DNA replication initiation [GO:0006270]		PS00847;PS50051;	PF00493;PF14551;PF17207;	SM00350;	PTHR11630;	UPI000006C3E4
NCU01175	Q92250	FPPS_NEUCR	Farnesyl pyrophosphate synthase (FPP synthase) (FPS) (EC 2.5.1.10) ((2E,6E)-farnesyl diphosphate synthase) (Dimethylallyltranstransferase) (EC 2.5.1.1) (Farnesyl diphosphate synthase) (Geranyltranstransferase)	fpp fpps 123A4.020 NCU01175	Neurospora crassa (strain ATCC 24698 / 74-OR23-1A / CBS 708.71 / DSM 1257 / FGSC 987)	347	cytoplasm [GO:0005737]; dimethylallyltranstransferase activity [GO:0004161]; geranyltranstransferase activity [GO:0004337]; metal ion binding [GO:0046872]; farnesyl diphosphate biosynthetic process [GO:0045337]; geranyl diphosphate biosynthetic process [GO:0033384]		PS00723;PS00444;	PF00348;		PTHR11525;	UPI000006A56C
NCU01177	Q1K857	Q1K857_NEUCR	NAD dependent epimerase/dehydratase	NCU01177	Neurospora crassa (strain ATCC 24698 / 74-OR23-1A / CBS 708.71 / DSM 1257 / FGSC 987)	338	methionine adenosyltransferase complex [GO:0048269]; methionine adenosyltransferase regulator activity [GO:0048270]; S-adenosylmethionine biosynthetic process [GO:0006556]			PF04321;		PTHR10491;	UPI000006A04D
NCU01179	P24391	TOM40_NEUCR	Mitochondrial import receptor subunit tom40 (Protein MOM38) (Translocase of outer membrane 40 kDa subunit)	tom40 mom38 B10H4.150 NCU01179	Neurospora crassa (strain ATCC 24698 / 74-OR23-1A / CBS 708.71 / DSM 1257 / FGSC 987)	349	mitochondrial outer membrane translocase complex [GO:0005742]; pore complex [GO:0046930]; porin activity [GO:0015288]; protein transmembrane transporter activity [GO:0008320]; ion transport [GO:0006811]; protein import into mitochondrial matrix [GO:0030150]			PF01459;		PTHR10802;	UPI0000130CBC
NCU01181	Q1K855	Q1K855_NEUCR	Acyl-CoA dehydrogenase family member 11	acd-3 NCU01181	Neurospora crassa (strain ATCC 24698 / 74-OR23-1A / CBS 708.71 / DSM 1257 / FGSC 987)	451	flavin adenine dinucleotide binding [GO:0050660]; oxidoreductase activity, acting on the CH-CH group of donors [GO:0016627]			PF00441;PF02770;PF02771;			UPI00000699E3
NCU01183	Q1K853	Q1K853_NEUCR	GTP-binding protein 1	NCU01183	Neurospora crassa (strain ATCC 24698 / 74-OR23-1A / CBS 708.71 / DSM 1257 / FGSC 987)	372	cytoplasm [GO:0005737]; GTP binding [GO:0005525]; cytoplasmic translation [GO:0002181]		PS51710;PS00905;	PF01926;PF16897;PF02824;			UPI0000069D78
NCU01189	Q1K848	Q1K848_NEUCR	Uncharacterized protein	NCU01189	Neurospora crassa (strain ATCC 24698 / 74-OR23-1A / CBS 708.71 / DSM 1257 / FGSC 987)	971							UPI0003CBCADF
NCU01190	Q1K847	Q1K847_NEUCR	DUF410 domain-containing protein	NCU01190	Neurospora crassa (strain ATCC 24698 / 74-OR23-1A / CBS 708.71 / DSM 1257 / FGSC 987)	343	BAT3 complex [GO:0071818]; TRC complex [GO:0072380]; protein insertion into ER membrane [GO:0045048]			PF04190;		PTHR12875;	UPI000006A0D0
NCU01192	Q1K845	Q1K845_NEUCR	DNA polymerase (EC 2.7.7.7)	pold-1 NCU01192	Neurospora crassa (strain ATCC 24698 / 74-OR23-1A / CBS 708.71 / DSM 1257 / FGSC 987)	1104	delta DNA polymerase complex [GO:0043625]; nuclear chromosome, telomeric region [GO:0000784]; 3'-5'-exodeoxyribonuclease activity [GO:0008296]; 4 iron, 4 sulfur cluster binding [GO:0051539]; DNA binding [GO:0003677]; DNA-directed DNA polymerase activity [GO:0003887]; metal ion binding [GO:0046872]; nucleotide binding [GO:0000166]; base-excision repair, gap-filling [GO:0006287]; DNA replication pr…		PS00116;	PF00136;PF03104;PF14260;	SM00486;		UPI000006BC5D
NCU01195	P00369	DHE4_NEUCR	NADP-specific glutamate dehydrogenase (NADP-GDH) (EC 1.4.1.4) (NADP-dependent glutamate dehydrogenase)	gdh am 18F11.230 NCU01195	Neurospora crassa (strain ATCC 24698 / 74-OR23-1A / CBS 708.71 / DSM 1257 / FGSC 987)	454	cytosol [GO:0005829]; glutamate dehydrogenase (NADP+) activity [GO:0004354]; glutamate biosynthetic process [GO:0006537]		PS00074;	PF00208;PF02812;	SM00839;		UPI000016891C
NCU01197	Q1K842	Q1K842_NEUCR	Cell wall biogenesis protein phosphatase Ssd1	gul-1 NCU01197	Neurospora crassa (strain ATCC 24698 / 74-OR23-1A / CBS 708.71 / DSM 1257 / FGSC 987)	1365	exosome (RNase complex) [GO:0000178]; P-body [GO:0000932]; 3'-5'-exoribonuclease activity [GO:0000175]; RNA binding [GO:0003723]; RNA catabolic process [GO:0006401]; rRNA processing [GO:0006364]			PF00773;	SM00955;		UPI0003CA4CA5
NCU01198	Q1K841	Q1K841_NEUCR	Gle-1 protein	gle-1 NCU01198	Neurospora crassa (strain ATCC 24698 / 74-OR23-1A / CBS 708.71 / DSM 1257 / FGSC 987)	541	cytoplasm [GO:0005737]; nuclear pore cytoplasmic filaments [GO:0044614]; inositol hexakisphosphate binding [GO:0000822]; phospholipid binding [GO:0005543]; translation initiation factor binding [GO:0031369]; mRNA export from nucleus [GO:0006406]; poly(A)+ mRNA export from nucleus [GO:0016973]; regulation of translational initiation [GO:0006446]; regulation of translational termination [GO:0006449]			PF07817;		PTHR12960;	UPI000006AF0C
NCU01200	Q7S7Z6	PPIB_NEUCR	Peptidyl-prolyl cis-trans isomerase B (PPIase B) (EC 5.2.1.8) (Rotamase B)	cpr2 18F11.170 NCU01200	Neurospora crassa (strain ATCC 24698 / 74-OR23-1A / CBS 708.71 / DSM 1257 / FGSC 987)	285	endoplasmic reticulum lumen [GO:0005788]; integral component of membrane [GO:0016021]; cyclosporin A binding [GO:0016018]; peptidyl-prolyl cis-trans isomerase activity [GO:0003755]; unfolded protein binding [GO:0051082]; protein refolding [GO:0042026]		PS00170;PS50072;	PF00160;		PTHR11071;	UPI00015C3846
NCU01201	Q8X0S4	TR112_NEUCR	Multifunctional methyltransferase subunit trm112 (RNA methyltransferase 1) (eRF1 methyltransferase subunit trm112) (eRF1 MTase subunit trm112) (tRNA methyltransferase 112 homolog)	rmt-1 trm112 18F11.160 NCU01201	Neurospora crassa (strain ATCC 24698 / 74-OR23-1A / CBS 708.71 / DSM 1257 / FGSC 987)	127	eRF1 methyltransferase complex [GO:0035657]; nucleus [GO:0005634]; tRNA (m2G10) methyltransferase complex [GO:0043528]; protein heterodimerization activity [GO:0046982]; protein methyltransferase activity [GO:0008276]; rRNA (guanine) methyltransferase activity [GO:0016435]; tRNA (guanine-N2-)-methyltransferase activity [GO:0004809]; maturation of LSU-rRNA [GO:0000470]; maturation of SSU-rRNA [GO:…			PF03966;		PTHR12773;	UPI000006BD86
NCU01204	V5ILA3	V5ILA3_NEUCR	Tropomyosin	tpm NCU01204	Neurospora crassa (strain ATCC 24698 / 74-OR23-1A / CBS 708.71 / DSM 1257 / FGSC 987)	161	actin filament [GO:0005884]; actomyosin contractile ring [GO:0005826]; actin filament binding [GO:0051015]; actin filament organization [GO:0007015]; mitotic cytokinesis [GO:0000281]			PF12718;			UPI000018A2E3
NCU01204	V5ILK2	V5ILK2_NEUCR	Tropomyosin, variant	tpm NCU01204	Neurospora crassa (strain ATCC 24698 / 74-OR23-1A / CBS 708.71 / DSM 1257 / FGSC 987)	123				PF12718;			UPI000006A305
NCU01207	P11592	VATA_NEUCR	V-type proton ATPase catalytic subunit A (V-ATPase subunit A) (EC 7.1.2.2) (V-ATPase 67 kDa subunit) (Vacuolar proton pump subunit alpha)	vma-1 18F11.090 NCU01207	Neurospora crassa (strain ATCC 24698 / 74-OR23-1A / CBS 708.71 / DSM 1257 / FGSC 987)	607	fungal-type vacuole membrane [GO:0000329]; plasma membrane [GO:0005886]; proton-transporting V-type ATPase, V1 domain [GO:0033180]; vacuolar membrane [GO:0005774]; ATP binding [GO:0005524]; proton-transporting ATPase activity, rotational mechanism [GO:0046961]; ATP hydrolysis coupled proton transport [GO:0015991]; ATP metabolic process [GO:0046034]		PS00152;	PF00006;PF02874;PF16886;		PTHR43607;	UPI0000138141
NCU01215	Q1K831	Q1K831_NEUCR	Thioesterase	NCU01215	Neurospora crassa (strain ATCC 24698 / 74-OR23-1A / CBS 708.71 / DSM 1257 / FGSC 987)	238	acyl-CoA hydrolase activity [GO:0047617]			PF03061;		PTHR21660;	UPI000006B851
NCU01218	F5HHM6	F5HHM6_NEUCR	Uncharacterized protein	NCU01218	Neurospora crassa (strain ATCC 24698 / 74-OR23-1A / CBS 708.71 / DSM 1257 / FGSC 987)	391	integral component of membrane [GO:0016021]; intramolecular lyase activity [GO:0016872]			PF16035;			UPI00000696CF
NCU01219	Q1K830	Q1K830_NEUCR	Glutaredoxin	NCU01219	Neurospora crassa (strain ATCC 24698 / 74-OR23-1A / CBS 708.71 / DSM 1257 / FGSC 987)	191	nucleus [GO:0005634]; electron transfer activity [GO:0009055]; glutathione-disulfide reductase activity [GO:0004362]; protein disulfide oxidoreductase activity [GO:0015035]; cell redox homeostasis [GO:0045454]; cellular response to oxidative stress [GO:0034599]		PS00195;PS51354;	PF00462;			UPI0003CAE7F9
NCU01220	Q1K829	Q1K829_NEUCR	BAG domain-containing protein	NCU01220	Neurospora crassa (strain ATCC 24698 / 74-OR23-1A / CBS 708.71 / DSM 1257 / FGSC 987)	357	U12-type spliceosomal complex [GO:0005689]; chaperone binding [GO:0051087]; mRNA splicing, via spliceosome [GO:0000398]		PS50053;	PF02179;		PTHR14942;	UPI000006A0E5
NCU01221	Q9P720	RL16_NEUCR	60S ribosomal protein L16 (Cytoplasmic ribosomal protein 46)	crp-46 rpl16 8D4.200 NCU01221	Neurospora crassa (strain ATCC 24698 / 74-OR23-1A / CBS 708.71 / DSM 1257 / FGSC 987)	202	cytosolic large ribosomal subunit [GO:0022625]; ribosome [GO:0005840]; mRNA binding [GO:0003729]; structural constituent of ribosome [GO:0003735]; negative regulation of translation [GO:0017148]; translation [GO:0006412]		PS00783;	PF00572;		PTHR11545;PTHR11545:SF3;	UPI000006A112
NCU01221	V5ILK7	V5ILK7_NEUCR	60S ribosomal protein L16	NCU01221	Neurospora crassa (strain ATCC 24698 / 74-OR23-1A / CBS 708.71 / DSM 1257 / FGSC 987)	231	large ribosomal subunit [GO:0015934]; structural constituent of ribosome [GO:0003735]; translation [GO:0006412]		PS00783;	PF00572;		PTHR11545;PTHR11545:SF3;	UPI0003CB4D22
NCU01224	F5HCG6	F5HCG6_NEUCR	26S protease regulatory subunit 4	rpt-2 NCU01224	Neurospora crassa (strain ATCC 24698 / 74-OR23-1A / CBS 708.71 / DSM 1257 / FGSC 987)	459	cytoplasm [GO:0005737]; proteasome regulatory particle, base subcomplex [GO:0008540]; ATP binding [GO:0005524]; peptidase activity [GO:0008233]; proteasome-activating ATPase activity [GO:0036402]; TBP-class protein binding [GO:0017025]; protein catabolic process [GO:0030163]		PS00674;	PF00004;PF16450;	SM00382;	PTHR23073:SF24;	UPI000006A86E
NCU01225	Q1K827	Q1K827_NEUCR	Ubiquitin conjugating enzyme	NCU01225	Neurospora crassa (strain ATCC 24698 / 74-OR23-1A / CBS 708.71 / DSM 1257 / FGSC 987)	235	nucleus [GO:0005634]; ATP binding [GO:0005524]; ubiquitin conjugating enzyme activity [GO:0061631]		PS50030;PS00183;PS50127;	PF09288;PF00179;			UPI000006A587
NCU01227	Q9P727	SUCA_NEUCR	Succinate--CoA ligase [ADP-forming] subunit alpha, mitochondrial (EC 6.2.1.5) (Succinyl-CoA synthetase subunit alpha) (SCS-alpha)	tca-8 8D4.130 NCU01227	Neurospora crassa (strain ATCC 24698 / 74-OR23-1A / CBS 708.71 / DSM 1257 / FGSC 987)	333	mitochondrion [GO:0005739]; succinate-CoA ligase complex (GDP-forming) [GO:0045244]; cofactor binding [GO:0048037]; GDP binding [GO:0019003]; nucleoside diphosphate kinase activity [GO:0004550]; succinate-CoA ligase (ADP-forming) activity [GO:0004775]; succinate-CoA ligase (GDP-forming) activity [GO:0004776]; nucleoside triphosphate biosynthetic process [GO:0009142]; succinate metabolic process […		PS01216;PS00399;	PF02629;PF00549;	SM00881;		UPI000006B831
NCU01229	Q1K825	Q1K825_NEUCR	Elongator complex protein 3 (EC 2.3.1.48)	elp3 NCU01229	Neurospora crassa (strain ATCC 24698 / 74-OR23-1A / CBS 708.71 / DSM 1257 / FGSC 987)	571	cytoplasm [GO:0005737]; Elongator holoenzyme complex [GO:0033588]; nucleus [GO:0005634]; histone acetyltransferase activity [GO:0004402]; iron-sulfur cluster binding [GO:0051536]; metal ion binding [GO:0046872]; regulation of transcription by RNA polymerase II [GO:0006357]; tRNA wobble base 5-methoxycarbonylmethyl-2-thiouridinylation [GO:0002926]		PS51186;	PF00583;PF04055;PF16199;	SM00729;	PTHR11135;PTHR11135:SF0;	UPI0000069E39
NCU01233	Q1K822	Q1K822_NEUCR	Aldose reductase	NCU01233	Neurospora crassa (strain ATCC 24698 / 74-OR23-1A / CBS 708.71 / DSM 1257 / FGSC 987)	289	oxidoreductase activity [GO:0016491]		PS00063;	PF00248;			UPI0000069B9C
NCU01234	Q9P735	FAL1_NEUCR	ATP-dependent RNA helicase fal-1 (EC 3.6.4.13)	fal-1 8D4.050 NCU01234	Neurospora crassa (strain ATCC 24698 / 74-OR23-1A / CBS 708.71 / DSM 1257 / FGSC 987)	400	nucleolus [GO:0005730]; ATP binding [GO:0005524]; helicase activity [GO:0004386]; RNA binding [GO:0003723]; rRNA processing [GO:0006364]		PS00039;PS51192;PS51194;PS51195;	PF00270;PF00271;	SM00487;SM00490;		UPI0000069962
NCU01235	Q1K820	Q1K820_NEUCR	Splicing factor 3a subunit 3	NCU01235	Neurospora crassa (strain ATCC 24698 / 74-OR23-1A / CBS 708.71 / DSM 1257 / FGSC 987)	501	spliceosomal complex [GO:0005681]; RNA binding [GO:0003723]; zinc ion binding [GO:0008270]; mRNA splicing, via spliceosome [GO:0000398]		PS50171;PS00028;	PF11931;PF16837;PF12108;PF12171;	SM00355;	PTHR12786:SF2;	UPI0003CA25C9
NCU01240	V5IMX0	V5IMX0_NEUCR	Uncharacterized protein	NCU01240	Neurospora crassa (strain ATCC 24698 / 74-OR23-1A / CBS 708.71 / DSM 1257 / FGSC 987)	542				PF07958;		PTHR31687;	UPI0003CBDCB1
NCU01241	Q1K816	Q1K816_NEUCR	Mitochondrial carrier protein	NCU01241	Neurospora crassa (strain ATCC 24698 / 74-OR23-1A / CBS 708.71 / DSM 1257 / FGSC 987)	706	integral component of membrane [GO:0016021]; calcium ion binding [GO:0005509]; L-aspartate transmembrane transporter activity [GO:0015183]; L-glutamate transmembrane transporter activity [GO:0005313]; aspartate transmembrane transport [GO:0015810]; L-glutamate transmembrane transport [GO:0015813]; malate-aspartate shuttle [GO:0043490]		PS00018;PS50222;PS50920;	PF13499;PF00153;	SM00054;	PTHR24089;	UPI0000069D56
NCU01247	Q7RVT5	Q7RVT5_NEUCR	Uncharacterized protein	NCU01247	Neurospora crassa (strain ATCC 24698 / 74-OR23-1A / CBS 708.71 / DSM 1257 / FGSC 987)	1226	nucleus [GO:0005634]; chromatin binding [GO:0003682]; meiotic sister chromatid cohesion [GO:0051177]; mitotic sister chromatid cohesion [GO:0007064]		PS51425;	PF08514;		PTHR11199;	UPI000006B6F9
NCU01249	Q1K6K3	Q1K6K3_NEUCR	Importin subunit alpha	NCU01249	Neurospora crassa (strain ATCC 24698 / 74-OR23-1A / CBS 708.71 / DSM 1257 / FGSC 987)	548	cytosol [GO:0005829]; nuclear pore [GO:0005643]; nucleoplasm [GO:0005654]; nuclear import signal receptor activity [GO:0061608]; nuclear localization sequence binding [GO:0008139]; protein transporter activity [GO:0008565]; NLS-bearing protein import into nucleus [GO:0006607]		PS50176;PS51214;	PF00514;PF16186;PF01749;	SM00185;		UPI000006B681
NCU01255	F5HC00	F5HC00_NEUCR	Mitochondrial dynamin GTPase	NCU01255	Neurospora crassa (strain ATCC 24698 / 74-OR23-1A / CBS 708.71 / DSM 1257 / FGSC 987)	939	cytoplasm [GO:0005737]; membrane [GO:0016020]; GTP binding [GO:0005525]; GTPase activity [GO:0003924]; microtubule binding [GO:0008017]		PS00410;PS51718;PS51388;	PF01031;PF00350;	SM00053;	PTHR11566;	UPI000000D198
NCU01256	Q1K6R6	Q1K6R6_NEUCR	Glutamine amidotransferase	NCU01256	Neurospora crassa (strain ATCC 24698 / 74-OR23-1A / CBS 708.71 / DSM 1257 / FGSC 987)	503	cytoplasm [GO:0005737]; glutathione hydrolase complex [GO:0061672]; omega peptidase activity [GO:0008242]; transferase activity [GO:0016740]; glutamine metabolic process [GO:0006541]; glutathione catabolic process [GO:0006751]		PS51278;	PF13230;			UPI000000D197
NCU01257	Q1K6R5	Q1K6R5_NEUCR	Uncharacterized protein	NCU01257	Neurospora crassa (strain ATCC 24698 / 74-OR23-1A / CBS 708.71 / DSM 1257 / FGSC 987)	436	nuclear periphery [GO:0034399]; nucleolus [GO:0005730]; preribosome, large subunit precursor [GO:0030687]; ribosomal large subunit biogenesis [GO:0042273]; rRNA processing [GO:0006364]			PF05890;		PTHR13028;	UPI000000D196
NCU01258	Q871Z4	CYNS_NEUCR	Cyanate hydratase (Cyanase) (EC 4.2.1.104) (Cyanate hydrolase) (Cyanate lyase)	cyn1 B10N12.060 NCU01258	Neurospora crassa (strain ATCC 24698 / 74-OR23-1A / CBS 708.71 / DSM 1257 / FGSC 987)	164	cyanate hydratase activity [GO:0008824]; sequence-specific DNA binding [GO:0043565]; cyanate metabolic process [GO:0009439]			PF02560;	SM01116;	PTHR34186;	UPI000000D195
NCU01258	V5IMX5	V5IMX5_NEUCR	Cyanate hydratase (Cyanase) (EC 4.2.1.104) (Cyanate hydrolase) (Cyanate lyase)	cyn1 NCU01258	Neurospora crassa (strain ATCC 24698 / 74-OR23-1A / CBS 708.71 / DSM 1257 / FGSC 987)	181	cyanate hydratase activity [GO:0008824]; sequence-specific DNA binding [GO:0043565]; cyanate metabolic process [GO:0009439]			PF02560;	SM01116;	PTHR34186;	UPI0003CBD67F
NCU01260	Q1K6R3	Q1K6R3_NEUCR	Uncharacterized protein	NCU01260	Neurospora crassa (strain ATCC 24698 / 74-OR23-1A / CBS 708.71 / DSM 1257 / FGSC 987)	2307	transcription factor TFIIIC complex [GO:0000127]; RNA polymerase III type 1 promoter sequence-specific DNA binding [GO:0001002]; RNA polymerase III type 2 promoter sequence-specific DNA binding [GO:0001003]; 5S class rRNA transcription by RNA polymerase III [GO:0042791]; transcription initiation from RNA polymerase III promoter [GO:0006384]		PS50157;	PF04182;			UPI000000D193
NCU01271	P27121	DCOR_NEUCR	Ornithine decarboxylase (ODC) (EC 4.1.1.17)	spe-1 B13M13.130 NCU01271	Neurospora crassa (strain ATCC 24698 / 74-OR23-1A / CBS 708.71 / DSM 1257 / FGSC 987)	484	cytoplasm [GO:0005737]; ornithine decarboxylase activity [GO:0004586]; putrescine biosynthetic process from ornithine [GO:0033387]		PS00878;PS00879;	PF02784;PF00278;		PTHR11482;	UPI0000128FF0
NCU01272	Q7S7C0	CYM1_NEUCR	Mitochondrial presequence protease (EC 3.4.24.-)	cym-1 B13M13.120 NCU01272	Neurospora crassa (strain ATCC 24698 / 74-OR23-1A / CBS 708.71 / DSM 1257 / FGSC 987)	1012	mitochondrial intermembrane space [GO:0005758]; mitochondrial matrix [GO:0005759]; mitochondrion [GO:0005739]; metal ion binding [GO:0046872]; metalloendopeptidase activity [GO:0004222]; protein processing [GO:0016485]; proteolysis involved in cellular protein catabolic process [GO:0051603]			PF08367;PF00675;PF05193;	SM01264;		UPI000018A3E7
NCU01276	Q7S7B6	Q7S7B6_NEUCR	N-acetyltransferase 5	NCU01276	Neurospora crassa (strain ATCC 24698 / 74-OR23-1A / CBS 708.71 / DSM 1257 / FGSC 987)	190	NatB complex [GO:0031416]; peptide alpha-N-acetyltransferase activity [GO:0004596]; N-terminal peptidyl-methionine acetylation [GO:0017196]		PS51186;	PF00583;			UPI000018A3EB
NCU01277	Q7S7B5	Q7S7B5_NEUCR	Uncharacterized protein	NCU01277	Neurospora crassa (strain ATCC 24698 / 74-OR23-1A / CBS 708.71 / DSM 1257 / FGSC 987)	417							UPI0003CAF86A
NCU01278	V5ILC1	V5ILC1_NEUCR	Uncharacterized protein	NCU01278	Neurospora crassa (strain ATCC 24698 / 74-OR23-1A / CBS 708.71 / DSM 1257 / FGSC 987)	806	chromosome, centromeric region [GO:0000775]; nucleus [GO:0005634]; mitotic cell cycle [GO:0000278]			PF06248;			UPI0003CAE78B
NCU01278	V5ILM0	V5ILM0_NEUCR	Uncharacterized protein	NCU01278	Neurospora crassa (strain ATCC 24698 / 74-OR23-1A / CBS 708.71 / DSM 1257 / FGSC 987)	862	cytoplasm [GO:0005737]; nucleus [GO:0005634]; RZZ complex [GO:1990423]; endoplasmic reticulum to Golgi vesicle-mediated transport [GO:0006888]; mitotic spindle assembly checkpoint [GO:0007094]			PF06248;			UPI0003CAE6AA
NCU01282	Q871Y8	SNF7_NEUCR	Vacuolar-sorting protein snf7 (Vacuolar protein-sorting-associated protein 32)	vsp-3 snf7 vps32 B9K17.010 NCU01282	Neurospora crassa (strain ATCC 24698 / 74-OR23-1A / CBS 708.71 / DSM 1257 / FGSC 987)	228	endosome membrane [GO:0010008]; vacuolar transport [GO:0007034]			PF03357;			UPI000000D37F
NCU01283	V5IMD1	V5IMD1_NEUCR	Uncharacterized protein	NCU01283	Neurospora crassa (strain ATCC 24698 / 74-OR23-1A / CBS 708.71 / DSM 1257 / FGSC 987)	1354							UPI0003CA7199
NCU01283	V5IP60	V5IP60_NEUCR	Uncharacterized protein	NCU01283	Neurospora crassa (strain ATCC 24698 / 74-OR23-1A / CBS 708.71 / DSM 1257 / FGSC 987)	1181							UPI0003CBB447
NCU01290	Q1K6T3	Q1K6T3_NEUCR	Centromere/microtubule-binding protein CBF5	NCU01290	Neurospora crassa (strain ATCC 24698 / 74-OR23-1A / CBS 708.71 / DSM 1257 / FGSC 987)	480	box H/ACA snoRNP complex [GO:0031429]; pseudouridine synthase activity [GO:0009982]; RNA binding [GO:0003723]; box H/ACA snoRNA 3'-end processing [GO:0000495]; mRNA pseudouridine synthesis [GO:1990481]; rRNA pseudouridine synthesis [GO:0031118]; snRNA pseudouridine synthesis [GO:0031120]		PS50890;	PF08068;PF01472;PF16198;PF01509;	SM01136;SM00359;	PTHR23127;	UPI000000D387
NCU01300	Q9HEG3	HIS7_NEUCR	Imidazoleglycerol-phosphate dehydratase (IGPD) (EC 4.2.1.19)	65E11.030 NCU01300	Neurospora crassa (strain ATCC 24698 / 74-OR23-1A / CBS 708.71 / DSM 1257 / FGSC 987)	229	imidazoleglycerol-phosphate dehydratase activity [GO:0004424]; histidine biosynthetic process [GO:0000105]		PS00954;PS00955;	PF00475;		PTHR23133;	UPI000006BAD6
NCU01301	Q9HEG2	LOC1_NEUCR	60S ribosomal subunit assembly/export protein loc-1	loc-1 65E11.040 NCU01301	Neurospora crassa (strain ATCC 24698 / 74-OR23-1A / CBS 708.71 / DSM 1257 / FGSC 987)	209	nucleolus [GO:0005730]; preribosome, large subunit precursor [GO:0030687]; mRNA binding [GO:0003729]; intracellular mRNA localization [GO:0008298]; mRNA transport [GO:0051028]; ribosomal large subunit biogenesis [GO:0042273]					PTHR28028;	UPI0000069FFA
NCU01304	Q7RVW2	Q7RVW2_NEUCR	Mitochondrial mRNA processing protein PET127	NCU01304	Neurospora crassa (strain ATCC 24698 / 74-OR23-1A / CBS 708.71 / DSM 1257 / FGSC 987)	850	mitochondrial envelope [GO:0005740]; mitochondrial RNA 5'-end processing [GO:0000964]			PF08634;		PTHR31014;	UPI0003CB3F13
NCU01310	Q1K7V7	Q1K7V7_NEUCR	Uncharacterized protein	NCU01310	Neurospora crassa (strain ATCC 24698 / 74-OR23-1A / CBS 708.71 / DSM 1257 / FGSC 987)	484	mRNA binding [GO:0003729]; RNA 7-methylguanosine cap binding [GO:0000340]			PF10309;		PTHR16291;	UPI000006A8DD
NCU01317	Q9C285	RL12_NEUCR	60S ribosomal protein L12	rpl-12 B12K8.20 NCU01317	Neurospora crassa (strain ATCC 24698 / 74-OR23-1A / CBS 708.71 / DSM 1257 / FGSC 987)	165	cytosolic large ribosomal subunit [GO:0022625]; large ribosomal subunit [GO:0015934]; large ribosomal subunit rRNA binding [GO:0070180]; rRNA binding [GO:0019843]; structural constituent of ribosome [GO:0003735]; ribosomal large subunit assembly [GO:0000027]; translation [GO:0006412]			PF00298;PF03946;	SM00649;	PTHR11661;	UPI0000069C0B
NCU01318	Q9C284	SEC23_NEUCR	Protein transport protein sec23	sec23-1 B12K8.030 NCU01318	Neurospora crassa (strain ATCC 24698 / 74-OR23-1A / CBS 708.71 / DSM 1257 / FGSC 987)	775	COPII vesicle coat [GO:0030127]; endoplasmic reticulum [GO:0005783]; endoplasmic reticulum membrane [GO:0005789]; Golgi membrane [GO:0000139]; GTPase activator activity [GO:0005096]; zinc ion binding [GO:0008270]; cargo loading into COPII-coated vesicle [GO:0090110]; Golgi organization [GO:0007030]; intracellular protein transport [GO:0006886]; macroautophagy [GO:0016236]; regulation of cell shap…			PF00626;PF08033;PF04815;PF04811;PF04810;		PTHR11141;	UPI00000696FC
NCU01319	Q1K7V2	Q1K7V2_NEUCR	Uncharacterized protein	NCU01319	Neurospora crassa (strain ATCC 24698 / 74-OR23-1A / CBS 708.71 / DSM 1257 / FGSC 987)	634	integral component of membrane [GO:0016021]						UPI0003CA457C
NCU01320	V5ILD3	V5ILD3_NEUCR	Glutathione S-transferase, variant 2	gst-3 NCU01320	Neurospora crassa (strain ATCC 24698 / 74-OR23-1A / CBS 708.71 / DSM 1257 / FGSC 987)	148	endoplasmic reticulum [GO:0005783]; integral component of membrane [GO:0016021]; nuclear envelope [GO:0005635]; glutathione peroxidase activity [GO:0004602]; glutathione transferase activity [GO:0004364]			PF01124;			UPI000006A727
NCU01323	Q1K7U8	Q1K7U8_NEUCR	Structural maintenance of chromosomes protein	NCU01323	Neurospora crassa (strain ATCC 24698 / 74-OR23-1A / CBS 708.71 / DSM 1257 / FGSC 987)	1263	cohesin complex [GO:0008278]; nucleus [GO:0005634]; ATP binding [GO:0005524]; chromatin binding [GO:0003682]; protein heterodimerization activity [GO:0046982]; mitotic sister chromatid cohesion [GO:0007064]			PF06470;PF02463;	SM00968;	PTHR18937:SF12;	UPI00015C38EC
NCU01327	Q1K7U4	Q1K7U4_NEUCR	Uncharacterized protein	NCU01327	Neurospora crassa (strain ATCC 24698 / 74-OR23-1A / CBS 708.71 / DSM 1257 / FGSC 987)	602							UPI000006B0E0
NCU01328	F5HDV2	F5HDV2_NEUCR	Transketolase (EC 2.2.1.1)	NCU01328	Neurospora crassa (strain ATCC 24698 / 74-OR23-1A / CBS 708.71 / DSM 1257 / FGSC 987)	686	cytosol [GO:0005829]; nucleus [GO:0005634]; metal ion binding [GO:0046872]; transketolase activity [GO:0004802]; pentose-phosphate shunt [GO:0006098]		PS00801;PS00802;	PF02779;PF02780;PF00456;	SM00861;	PTHR43522;	UPI000006B7E7
NCU01330	Q1K7U3	Q1K7U3_NEUCR	SacI domain-containing protein	NCU01330	Neurospora crassa (strain ATCC 24698 / 74-OR23-1A / CBS 708.71 / DSM 1257 / FGSC 987)	1011	endoplasmic reticulum [GO:0005783]; phosphatidylinositol-4-phosphate phosphatase activity [GO:0043812]; phosphatidylinositol dephosphorylation [GO:0046856]		PS51791;PS50275;	PF12456;PF02383;			UPI000006AB98
NCU01331	Q1K7U2	Q1K7U2_NEUCR	SnRNP and snoRNP protein	NCU01331	Neurospora crassa (strain ATCC 24698 / 74-OR23-1A / CBS 708.71 / DSM 1257 / FGSC 987)	128	box C/D snoRNP complex [GO:0031428]; small-subunit processome [GO:0032040]; U4/U6 x U5 tri-snRNP complex [GO:0046540]; RNA binding [GO:0003723]; maturation of LSU-rRNA [GO:0000470]; mRNA splicing, via spliceosome [GO:0000398]		PS01082;	PF01248;			UPI000006A914
NCU01332	P31413	VATL_NEUCR	V-type proton ATPase 16 kDa proteolipid subunit (V-ATPase 16 kDa proteolipid subunit) (Vacuolar proton pump 16 kDa proteolipid subunit)	vma-3 12F11.130 NCU01332	Neurospora crassa (strain ATCC 24698 / 74-OR23-1A / CBS 708.71 / DSM 1257 / FGSC 987)	161	integral component of membrane [GO:0016021]; proton-transporting V-type ATPase, V0 domain [GO:0033179]; vacuolar membrane [GO:0005774]; proton-transporting ATPase activity, rotational mechanism [GO:0046961]; ATP hydrolysis coupled proton transport [GO:0015991]			PF00137;			UPI00001381F9
NCU01337	Q1K7T9	Q1K7T9_NEUCR	Dihydrofolate synthetase (EC 6.3.2.12)	NCU01337	Neurospora crassa (strain ATCC 24698 / 74-OR23-1A / CBS 708.71 / DSM 1257 / FGSC 987)	412	cytoplasm [GO:0005737]; mitochondrial matrix [GO:0005759]; ATP binding [GO:0005524]; dihydrofolate synthase activity [GO:0008841]; tetrahydrofolylpolyglutamate synthase activity [GO:0004326]; one-carbon metabolic process [GO:0006730]		PS01012;	PF08245;		PTHR11136;	UPI0000069866
NCU01339	Q1K7T7	Q1K7T7_NEUCR	Uncharacterized protein	NCU01339	Neurospora crassa (strain ATCC 24698 / 74-OR23-1A / CBS 708.71 / DSM 1257 / FGSC 987)	370							UPI000006A5DD
NCU01340	Q1K7T6	Q1K7T6_NEUCR	Uncharacterized protein	NCU01340	Neurospora crassa (strain ATCC 24698 / 74-OR23-1A / CBS 708.71 / DSM 1257 / FGSC 987)	215							UPI000006B4BB
NCU01342	Q9HEK4	TMEDA_NEUCR	Endoplasmic reticulum vesicle protein 25	erv-1 erv25 12F11.230 NCU01342	Neurospora crassa (strain ATCC 24698 / 74-OR23-1A / CBS 708.71 / DSM 1257 / FGSC 987)	216	COPII-coated ER to Golgi transport vesicle [GO:0030134]; endoplasmic reticulum [GO:0005783]; endoplasmic reticulum membrane [GO:0005789]; endoplasmic reticulum-Golgi intermediate compartment [GO:0005793]; Golgi apparatus [GO:0005794]; Golgi membrane [GO:0000139]; integral component of membrane [GO:0016021]; endoplasmic reticulum to Golgi vesicle-mediated transport [GO:0006888]; Golgi organization…		PS50866;	PF01105;	SM01190;	PTHR22811;	UPI0003CB22B2
NCU01343	Q1K7T3	Q1K7T3_NEUCR	Succinate dehydrogenase assembly factor 2, mitochondrial (SDH assembly factor 2) (SDHAF2)	NCU01343	Neurospora crassa (strain ATCC 24698 / 74-OR23-1A / CBS 708.71 / DSM 1257 / FGSC 987)	221	mitochondrial matrix [GO:0005759]; mitochondrion [GO:0005739]; mitochondrial electron transport, succinate to ubiquinone [GO:0006121]; mitochondrial respiratory chain complex II assembly [GO:0034553]; protein-FAD linkage [GO:0018293]; tricarboxylic acid cycle [GO:0006099]			PF03937;			UPI0000069D66
NCU01347	Q1K7T1	Q1K7T1_NEUCR	Uncharacterized protein	NCU01347	Neurospora crassa (strain ATCC 24698 / 74-OR23-1A / CBS 708.71 / DSM 1257 / FGSC 987)	384				PF13417;			UPI000006BE0C
NCU01353	Q1K7S6	Q1K7S6_NEUCR	Mixed-linked glucanase	gh16-1 NCU01353	Neurospora crassa (strain ATCC 24698 / 74-OR23-1A / CBS 708.71 / DSM 1257 / FGSC 987)	725	glucan endo-1,3-beta-glucanase activity, C-3 substituted reducing group [GO:0052861]; glucan catabolic process [GO:0009251]		PS51762;	PF00722;			UPI0000069BD5
NCU01360	Q1K6N5	Q1K6N5_NEUCR	NADH:ubiquinone oxidoreductase 11.5kD subunit	nuo11.5 NCU01360	Neurospora crassa (strain ATCC 24698 / 74-OR23-1A / CBS 708.71 / DSM 1257 / FGSC 987)	105	mitochondrial respiratory chain complex I [GO:0005747]; mitochondrial respiratory chain complex I assembly [GO:0032981]			PF10200;			UPI000006B284
NCU01361	Q7RUD6	Q7RUD6_NEUCR	Uncharacterized protein	NCU01361	Neurospora crassa (strain ATCC 24698 / 74-OR23-1A / CBS 708.71 / DSM 1257 / FGSC 987)	1073	retrograde vesicle-mediated transport, Golgi to endoplasmic reticulum [GO:0006890]			PF08314;			UPI000018A3F5
NCU01364	Q1K6N3	Q1K6N3_NEUCR	Oxidoreductase	NCU01364	Neurospora crassa (strain ATCC 24698 / 74-OR23-1A / CBS 708.71 / DSM 1257 / FGSC 987)	359	dioxygenase activity [GO:0051213]; metal ion binding [GO:0046872]		PS51471;	PF03171;PF14226;			UPI00000694D0
NCU01367	Q1K6N0	Q1K6N0_NEUCR	Small nucleolar ribonucleoprotein complex subunit	NCU01367	Neurospora crassa (strain ATCC 24698 / 74-OR23-1A / CBS 708.71 / DSM 1257 / FGSC 987)	629	small-subunit processome [GO:0032040]; snoRNA binding [GO:0030515]; U3 snoRNA binding [GO:0034511]; rRNA processing [GO:0006364]		PS50082;PS50294;	PF00400;	SM00320;	PTHR19865;	UPI000006B1E6
NCU01368	Q9P6U7	PSB4_NEUCR	Probable proteasome subunit beta type-4 (EC 3.4.25.1) (Proteosome catalytic beta subunit 4)	pcb-4 15E6.60 NCU01368	Neurospora crassa (strain ATCC 24698 / 74-OR23-1A / CBS 708.71 / DSM 1257 / FGSC 987)	203	cytoplasm [GO:0005737]; endoplasmic reticulum membrane [GO:0005789]; nucleus [GO:0005634]; proteasome core complex [GO:0005839]; proteasome core complex, beta-subunit complex [GO:0019774]; endopeptidase activator activity [GO:0061133]; endopeptidase activity [GO:0004175]; threonine-type endopeptidase activity [GO:0004298]; proteasomal protein catabolic process [GO:0010498]; proteasomal ubiquitin-…		PS00854;PS51476;	PF00227;		PTHR11599:SF6;	UPI00021D7405
NCU01369	Q9P6U9	DED1_NEUCR	ATP-dependent RNA helicase ded1 (EC 3.6.4.13) (DEAD box RNA helicase 9)	drh-9 ded1 15E6.040 NCU01369	Neurospora crassa (strain ATCC 24698 / 74-OR23-1A / CBS 708.71 / DSM 1257 / FGSC 987)	688	cytoplasm [GO:0005737]; ATP binding [GO:0005524]; helicase activity [GO:0004386]; translation initiation factor activity [GO:0003743]		PS00039;PS51192;PS51194;PS51195;	PF00270;PF00271;	SM00487;SM00490;		UPI0000069953
NCU01379	Q7S7K6	Q7S7K6_NEUCR	Histone acetylase complex subunit Paf400	stk-18 NCU01379	Neurospora crassa (strain ATCC 24698 / 74-OR23-1A / CBS 708.71 / DSM 1257 / FGSC 987)	3895	NuA4 histone acetyltransferase complex [GO:0035267]; nucleus [GO:0005634]; SAGA complex [GO:0000124]; kinase activity [GO:0016301]; transcription coregulator activity [GO:0003712]; DNA repair [GO:0006281]; histone acetylation [GO:0016573]; regulation of transcription, DNA-templated [GO:0006355]		PS51189;PS51190;PS50290;	PF02259;PF00454;	SM00146;	PTHR11139:SF1;	UPI0003CA0704
NCU01381	Q1K702	Q1K702_NEUCR	Uncharacterized protein	NCU01381	Neurospora crassa (strain ATCC 24698 / 74-OR23-1A / CBS 708.71 / DSM 1257 / FGSC 987)	196				PF06094;			UPI0003CBB799
NCU01388	Q1K6Z7	Q1K6Z7_NEUCR	Alpha-1,2-mannosyltransferase	NCU01388	Neurospora crassa (strain ATCC 24698 / 74-OR23-1A / CBS 708.71 / DSM 1257 / FGSC 987)	393	Golgi apparatus [GO:0005794]; membrane [GO:0016020]; alpha-1,2-mannosyltransferase activity [GO:0000026]; cell wall mannoprotein biosynthetic process [GO:0000032]; protein N-linked glycosylation [GO:0006487]; protein O-linked glycosylation [GO:0006493]			PF01793;		PTHR31121;	UPI000006A125
NCU01391	Q1K6Z4	Q1K6Z4_NEUCR	Uncharacterized protein	NCU01391	Neurospora crassa (strain ATCC 24698 / 74-OR23-1A / CBS 708.71 / DSM 1257 / FGSC 987)	90							UPI000000D310
NCU01393	F5HFI3	F5HFI3_NEUCR	Class III chitinase	NCU01393	Neurospora crassa (strain ATCC 24698 / 74-OR23-1A / CBS 708.71 / DSM 1257 / FGSC 987)	375	carbohydrate metabolic process [GO:0005975]			PF00704;			UPI000000D311
NCU01395	Q7S766	Q7S766_NEUCR	WSC domain-containing protein	NCU01395	Neurospora crassa (strain ATCC 24698 / 74-OR23-1A / CBS 708.71 / DSM 1257 / FGSC 987)	501				PF09362;			UPI000018A421
NCU01399	Q7S762	Q7S762_NEUCR	Short chain dehydrogenase/reductase family protein	NCU01399	Neurospora crassa (strain ATCC 24698 / 74-OR23-1A / CBS 708.71 / DSM 1257 / FGSC 987)	307	oxidoreductase activity [GO:0016491]		PS00061;				UPI0003CAEBE1
NCU01401	V5IPB4	V5IPB4_NEUCR	Mitochondrial outer membrane protein, variant	tob38 NCU01401	Neurospora crassa (strain ATCC 24698 / 74-OR23-1A / CBS 708.71 / DSM 1257 / FGSC 987)	340				PF17171;PF17172;			UPI000018A443
NCU01408	Q7S7G7	CSN3_NEUCR	COP9 signalosome complex subunit 3 (Signalosome subunit 3)	csn-3 G11A3.070 NCU01408	Neurospora crassa (strain ATCC 24698 / 74-OR23-1A / CBS 708.71 / DSM 1257 / FGSC 987)	497	COP9 signalosome [GO:0008180]; cytoplasm [GO:0005737]; ubiquitin-dependent protein catabolic process [GO:0006511]		PS50250;			PTHR10758:SF1;	UPI00002246B2
NCU01409	Q7S7G6	Q7S7G6_NEUCR	Ran-binding protein	NCU01409	Neurospora crassa (strain ATCC 24698 / 74-OR23-1A / CBS 708.71 / DSM 1257 / FGSC 987)	721			PS50188;PS50897;PS50896;	PF10607;PF08513;PF00622;	SM00757;SM00668;SM00667;SM00449;		UPI000018A3BA
NCU01412	Q1K6U2	Q1K6U2_NEUCR	Gamma-glutamyl phosphate reductase	pro-3 NCU01412	Neurospora crassa (strain ATCC 24698 / 74-OR23-1A / CBS 708.71 / DSM 1257 / FGSC 987)	445	glutamate-5-semialdehyde dehydrogenase activity [GO:0004350]; NADP binding [GO:0050661]; proline biosynthetic process [GO:0006561]		PS01223;	PF00171;			UPI000000D361
NCU01413	Q1K6U1	Q1K6U1_NEUCR	Myosin chain-like-1 protein	mcl-1 NCU01413	Neurospora crassa (strain ATCC 24698 / 74-OR23-1A / CBS 708.71 / DSM 1257 / FGSC 987)	834	cytoplasm [GO:0005737]; cell proliferation [GO:0008283]; microtubule cytoskeleton organization [GO:0000226]; mitotic spindle organization [GO:0007052]			PF12709;		PTHR13924;	UPI0003CA299C
NCU01414	Q1K6U0	STUA_NEUCR	Cell pattern formation-associated protein asm-1 (Ascospore maturation protein 1)	Asm-1 NCU01414	Neurospora crassa (strain ATCC 24698 / 74-OR23-1A / CBS 708.71 / DSM 1257 / FGSC 987)	643	nucleus [GO:0005634]; DNA binding [GO:0003677]; conidium formation [GO:0048315]; sporulation resulting in formation of a cellular spore [GO:0030435]		PS51299;		SM01252;		UPI000000D35F
NCU01419	Q1K6M1	Q1K6M1_NEUCR	Quinone oxidoreductase	NCU01419	Neurospora crassa (strain ATCC 24698 / 74-OR23-1A / CBS 708.71 / DSM 1257 / FGSC 987)	338	oxidoreductase activity [GO:0016491]			PF08240;PF00107;	SM00829;		UPI000000D359
NCU01420	Q1K6M0	Q1K6M0_NEUCR	Uncharacterized protein	NCU01420	Neurospora crassa (strain ATCC 24698 / 74-OR23-1A / CBS 708.71 / DSM 1257 / FGSC 987)	384	hydrolase activity [GO:0016787]			PF01738;			UPI000000D358
NCU01422	Q871W6	MBF1_NEUCR	Multiprotein-bridging factor 1	mbf-1 B8P8.060 NCU01422	Neurospora crassa (strain ATCC 24698 / 74-OR23-1A / CBS 708.71 / DSM 1257 / FGSC 987)	160	nucleus [GO:0005634]; sequence-specific DNA binding [GO:0043565]		PS50943;	PF01381;PF08523;	SM00530;		UPI000000D356
NCU01424	Q1K6L7	Q1K6L7_NEUCR	DUF636 domain-containing protein	NCU01424	Neurospora crassa (strain ATCC 24698 / 74-OR23-1A / CBS 708.71 / DSM 1257 / FGSC 987)	137	carbon-sulfur lyase activity [GO:0016846]			PF04828;			UPI000000D354
NCU01425	Q1K6L6	Q1K6L6_NEUCR	Uncharacterized protein	NCU01425	Neurospora crassa (strain ATCC 24698 / 74-OR23-1A / CBS 708.71 / DSM 1257 / FGSC 987)	278							UPI000000D353
NCU01427	P24322	GGPPS_NEUCR	Geranylgeranyl pyrophosphate synthase (GGPP synthase) (GGPPSase) (EC 2.5.1.-) ((2E,6E)-farnesyl diphosphate synthase) (Albino-3 protein) (Dimethylallyltranstransferase) (EC 2.5.1.1) (Farnesyl diphosphate synthase) (Farnesyltranstransferase) (EC 2.5.1.29) (Geranylgeranyl diphosphate synthase) (Geranyltranstransferase) (EC 2.5.1.10)	al-3 B8P8.010 NCU01427	Neurospora crassa (strain ATCC 24698 / 74-OR23-1A / CBS 708.71 / DSM 1257 / FGSC 987)	433	cytoplasm [GO:0005737]; dimethylallyltranstransferase activity [GO:0004161]; farnesyltranstransferase activity [GO:0004311]; geranyltranstransferase activity [GO:0004337]; metal ion binding [GO:0046872]; carotenoid biosynthetic process [GO:0016117]; farnesyl diphosphate biosynthetic process [GO:0045337]; geranyl diphosphate biosynthetic process [GO:0033384]; geranylgeranyl diphosphate biosyntheti…		PS00723;PS00444;	PF00348;			UPI00015C3A7B
NCU01428	V5ILW6	V5ILW6_NEUCR	5-hydroxyisourate hydrolase (HIU hydrolase) (HIUHase) (EC 3.5.2.17)	NCU01428	Neurospora crassa (strain ATCC 24698 / 74-OR23-1A / CBS 708.71 / DSM 1257 / FGSC 987)	138	hydroxyisourate hydrolase activity [GO:0033971]; purine nucleobase metabolic process [GO:0006144]		PS00768;PS00769;	PF00576;		PTHR10395;	UPI000018B2F6
NCU01429	Q7RWH9	Q7RWH9_NEUCR	Phosphoserine aminotransferase	ser-7 NCU01429	Neurospora crassa (strain ATCC 24698 / 74-OR23-1A / CBS 708.71 / DSM 1257 / FGSC 987)	429	O-phospho-L-serine:2-oxoglutarate aminotransferase activity [GO:0004648]; L-serine biosynthetic process [GO:0006564]			PF00266;			UPI000018B2F7
NCU01431	Q7RWH7	Q7RWH7_NEUCR	Cytokinesis protein sepA	bni1 NCU01431	Neurospora crassa (strain ATCC 24698 / 74-OR23-1A / CBS 708.71 / DSM 1257 / FGSC 987)	1817	cell division site [GO:0032153]; cytoplasm [GO:0005737]; mating projection tip [GO:0043332]; actin binding [GO:0003779]; profilin binding [GO:0005522]; Rho GTPase binding [GO:0017048]; actin filament bundle assembly [GO:0051017]; barbed-end actin filament capping [GO:0051016]; mitotic actomyosin contractile ring assembly [GO:1903475]; positive regulation of actin filament polymerization [GO:00308…		PS51231;PS51444;PS51232;	PF06367;PF06371;PF02181;	SM01139;SM01140;SM00498;		UPI000018B2F9
NCU01433	Q1K4R9	Q1K4R9_NEUCR	Serine/threonine-protein phosphatase (EC 3.1.3.16)	ppt-1 NCU01433	Neurospora crassa (strain ATCC 24698 / 74-OR23-1A / CBS 708.71 / DSM 1257 / FGSC 987)	479	cytosol [GO:0005829]; nucleus [GO:0005634]; protein serine/threonine phosphatase activity [GO:0004722]		PS00125;PS50005;PS50293;	PF00149;PF08321;PF13181;	SM00156;SM00028;	PTHR11668:SF391;	UPI000000D260
NCU01435	Q871M9	BUR1_NEUCR	Serine/threonine-protein kinase bur1 (EC 2.7.11.22) (EC 2.7.11.23) (Serine-threonine kinase 1)	stk-1 bur1 B20D17.070 NCU01435	Neurospora crassa (strain ATCC 24698 / 74-OR23-1A / CBS 708.71 / DSM 1257 / FGSC 987)	559	chromosome [GO:0005694]; cyclin-dependent protein kinase holoenzyme complex [GO:0000307]; cyclin/CDK positive transcription elongation factor complex [GO:0008024]; nuclear chromatin [GO:0000790]; nucleus [GO:0005634]; P-TEFb complex [GO:0070691]; P-TEFb-cap methyltransferase complex [GO:0070693]; ATP binding [GO:0005524]; cyclin binding [GO:0030332]; cyclin-dependent protein serine/threonine kina…		PS00107;PS50011;PS00108;	PF00069;	SM00220;		UPI0003CB2737
NCU01436	V5IPG4	V5IPG4_NEUCR	Questionable protein, variant	NCU01436	Neurospora crassa (strain ATCC 24698 / 74-OR23-1A / CBS 708.71 / DSM 1257 / FGSC 987)	83	integral component of membrane [GO:0016021]						UPI000322CF30
NCU01438	F5HGC3	F5HGC3_NEUCR	Nucleosome assembly protein	naf-1 NCU01438	Neurospora crassa (strain ATCC 24698 / 74-OR23-1A / CBS 708.71 / DSM 1257 / FGSC 987)	407	cytoplasm [GO:0005737]; nucleus [GO:0005634]; cyclin binding [GO:0030332]; enzyme activator activity [GO:0008047]; histone binding [GO:0042393]; identical protein binding [GO:0042802]; budding cell bud growth [GO:0007117]; nucleosome assembly [GO:0006334]; nucleosome disassembly [GO:0006337]; positive regulation of histone H3-K9 acetylation [GO:2000617]; positive regulation of microtubule polymer…			PF00956;		PTHR11875;	UPI000000D266
NCU01439	Q7RWH3	Q7RWH3_NEUCR	D-3-phosphoglycerate dehydrogenase 1	NCU01439	Neurospora crassa (strain ATCC 24698 / 74-OR23-1A / CBS 708.71 / DSM 1257 / FGSC 987)	466	NAD binding [GO:0051287]; phosphoglycerate dehydrogenase activity [GO:0004617]; L-serine biosynthetic process [GO:0006564]; serine family amino acid biosynthetic process [GO:0009070]		PS51671;PS00065;PS00670;PS00671;	PF00389;PF02826;		PTHR10996:SF165;	UPI000018B2FD
NCU01440	V5INB2	V5INB2_NEUCR	Myosin-2	NCU01440	Neurospora crassa (strain ATCC 24698 / 74-OR23-1A / CBS 708.71 / DSM 1257 / FGSC 987)	1594	actin filament bundle [GO:0032432]; cellular bud neck [GO:0005935]; cellular bud tip [GO:0005934]; filamentous actin [GO:0031941]; fungal-type vacuole membrane [GO:0000329]; incipient cellular bud site [GO:0000131]; mating projection tip [GO:0043332]; Myo2p-Vac17p-Vac8p transport complex [GO:0071563]; myosin complex [GO:0016459]; transport vesicle [GO:0030133]; actin filament binding [GO:0051015]…		PS51126;PS50096;PS51456;PS51844;	PF01843;PF00612;PF00063;PF02736;	SM01132;SM00015;SM00242;		UPI000000D268
NCU01441	Q1K4R6	ITPA_NEUCR	Inosine triphosphate pyrophosphatase (ITPase) (Inosine triphosphatase) (EC 3.6.1.9) (Non-canonical purine NTP pyrophosphatase) (Non-standard purine NTP pyrophosphatase) (Nucleoside-triphosphate diphosphatase) (Nucleoside-triphosphate pyrophosphatase) (NTPase)	B20D17.150 NCU01441	Neurospora crassa (strain ATCC 24698 / 74-OR23-1A / CBS 708.71 / DSM 1257 / FGSC 987)	191	cytoplasm [GO:0005737]; nucleus [GO:0005634]; metal ion binding [GO:0046872]; NADH pyrophosphatase activity [GO:0035529]; nucleoside-triphosphate diphosphatase activity [GO:0047429]; nucleotide binding [GO:0000166]; deoxyribonucleoside triphosphate catabolic process [GO:0009204]; nucleoside triphosphate catabolic process [GO:0009143]; nucleotide metabolic process [GO:0009117]			PF01725;		PTHR11067;	UPI000000D26A
NCU01443	Q7RWF9	Q7RWF9_NEUCR	Seryl-tRNA synthetase	NCU01443	Neurospora crassa (strain ATCC 24698 / 74-OR23-1A / CBS 708.71 / DSM 1257 / FGSC 987)	465	cytoplasm [GO:0005737]; cytoplasmic stress granule [GO:0010494]; ATP binding [GO:0005524]; serine-tRNA ligase activity [GO:0004828]; seryl-tRNA aminoacylation [GO:0006434]		PS50862;	PF02403;PF00587;		PTHR11778;	UPI000000D26D
NCU01444	Q1K4R5	Q1K4R5_NEUCR	Rheb small monomeric GTPase RhbA	NCU01444	Neurospora crassa (strain ATCC 24698 / 74-OR23-1A / CBS 708.71 / DSM 1257 / FGSC 987)	188	membrane [GO:0016020]; GDP binding [GO:0019003]; GTP binding [GO:0005525]; GTPase activity [GO:0003924]; mitotic G1 cell cycle arrest in response to nitrogen starvation [GO:0071851]; positive regulation of L-arginine import across plasma membrane [GO:1905589]; small GTPase mediated signal transduction [GO:0007264]		PS51421;	PF00071;		PTHR24070;	UPI000000D26E
NCU01446	V5ILW3	V5ILW3_NEUCR	Uracil phosphoribosyltransferase, variant 2	NCU01446	Neurospora crassa (strain ATCC 24698 / 74-OR23-1A / CBS 708.71 / DSM 1257 / FGSC 987)	244	transferase activity, transferring glycosyl groups [GO:0016757]; uridine kinase activity [GO:0004849]						UPI000000D1AF
NCU01447	Q1K4R2	Q1K4R2_NEUCR	Transcription elongation factor 1 homolog	NCU01447	Neurospora crassa (strain ATCC 24698 / 74-OR23-1A / CBS 708.71 / DSM 1257 / FGSC 987)	138	transcription elongation factor complex [GO:0008023]; metal ion binding [GO:0046872]; RNA polymerase II complex binding [GO:0000993]; chromatin-mediated maintenance of transcription [GO:0048096]; transcription elongation from RNA polymerase II promoter [GO:0006368]			PF05129;		PTHR20934;	UPI000000D1AE
NCU01449	V5ILK6	V5ILK6_NEUCR	GTP cyclohydrolase II, variant	rib-3 NCU01449	Neurospora crassa (strain ATCC 24698 / 74-OR23-1A / CBS 708.71 / DSM 1257 / FGSC 987)	507	GTP cyclohydrolase II activity [GO:0003935]; riboflavin biosynthetic process [GO:0009231]			PF12471;PF00925;			UPI0003CAE9BB
NCU01452	Q871N9	RS3A_NEUCR	40S ribosomal protein S1 (Cytoplasmic ribosomal protein 8)	rps1 crp-8 B11C21.160 NCU01452	Neurospora crassa (strain ATCC 24698 / 74-OR23-1A / CBS 708.71 / DSM 1257 / FGSC 987)	256	cytosol [GO:0005829]; cytosolic small ribosomal subunit [GO:0022627]; structural constituent of ribosome [GO:0003735]; translation [GO:0006412]		PS01191;	PF01015;	SM01397;		UPI000000D1AA
NCU01454	A3RNH6	A3RNH6_NEUCR	Mitochondrial hydrolase	NCU01454	Neurospora crassa (strain ATCC 24698 / 74-OR23-1A / CBS 708.71 / DSM 1257 / FGSC 987)	348	mitochondrion [GO:0005739]; hydrolase activity [GO:0016787]			PF00561;			UPI0003CB3C0E
NCU01455	A3RNH7	A3RNH7_NEUCR	Signal recognition particle subunit SRP72	NCU01455	Neurospora crassa (strain ATCC 24698 / 74-OR23-1A / CBS 708.71 / DSM 1257 / FGSC 987)	682	signal recognition particle, endoplasmic reticulum targeting [GO:0005786]; 7S RNA binding [GO:0008312]; SRP-dependent cotranslational protein targeting to membrane, translocation [GO:0006616]			PF08492;PF17004;		PTHR14094;	UPI000000D1A7
NCU01457	A3RNH9	A3RNH9_NEUCR	Ubiquitin C-terminal hydrolase	NCU01457	Neurospora crassa (strain ATCC 24698 / 74-OR23-1A / CBS 708.71 / DSM 1257 / FGSC 987)	755	integral component of membrane [GO:0016021]; cysteine-type endopeptidase activity [GO:0004197]; thiol-dependent ubiquitin-specific protease activity [GO:0004843]; protein deubiquitination [GO:0016579]; ubiquitin-dependent protein catabolic process [GO:0006511]		PS00973;PS50235;	PF00443;			UPI000000D1A4
NCU01460	A3RNI2	A3RNI2_NEUCR	Replication protein A-3	rpa-3 NCU01460	Neurospora crassa (strain ATCC 24698 / 74-OR23-1A / CBS 708.71 / DSM 1257 / FGSC 987)	108	DNA replication factor A complex [GO:0005662]; site of double-strand break [GO:0035861]; damaged DNA binding [GO:0003684]; single-stranded DNA binding [GO:0003697]; base-excision repair [GO:0006284]; DNA replication [GO:0006260]; double-strand break repair via homologous recombination [GO:0000724]; mismatch repair [GO:0006298]; nucleotide-excision repair [GO:0006289]			PF08661;			UPI000000D19F
NCU01467	Q7RXW4	Q7RXW4_NEUCR	NADH:ubiquinone oxidoreductase 10.4kD subunit	nuo10.4 NCU01467	Neurospora crassa (strain ATCC 24698 / 74-OR23-1A / CBS 708.71 / DSM 1257 / FGSC 987)	92							UPI000018B104
NCU01468	Q7RXW3	Q7RXW3_NEUCR	Translation initiation factor eIF-2B subunit delta	NCU01468	Neurospora crassa (strain ATCC 24698 / 74-OR23-1A / CBS 708.71 / DSM 1257 / FGSC 987)	463	translation initiation factor activity [GO:0003743]			PF01008;			UPI000018B105
NCU01469	Q7RXW2	Q7RXW2_NEUCR	Uncharacterized protein	NCU01469	Neurospora crassa (strain ATCC 24698 / 74-OR23-1A / CBS 708.71 / DSM 1257 / FGSC 987)	285	mitochondrion [GO:0005739]; ribosome binding [GO:0043022]; translation initiation factor activity [GO:0003743]; mitochondrial translational initiation [GO:0070124]; ribosome disassembly [GO:0032790]			PF00707;		PTHR10938;	UPI00002246B3
NCU01470	Q7RXW1	VAC8_NEUCR	Vacuolar protein 8	vac8 B11E5.070 NCU01470	Neurospora crassa (strain ATCC 24698 / 74-OR23-1A / CBS 708.71 / DSM 1257 / FGSC 987)	559	fungal-type vacuole membrane [GO:0000329]; Myo2p-Vac17p-Vac8p transport complex [GO:0071563]; nucleus-vacuole junction [GO:0071561]; protein membrane anchor [GO:0043495]; Cvt vesicle assembly [GO:0071255]; macroautophagy [GO:0016236]; nucleus-vacuole junction assembly [GO:0071562]; vacuole fusion, non-autophagic [GO:0042144]; vacuole inheritance [GO:0000011]		PS50176;	PF00514;	SM00185;		UPI0003CB5ECA
NCU01471	V5ILJ9	V5ILJ9_NEUCR	Nuclear protein SNF4, variant	NCU01471	Neurospora crassa (strain ATCC 24698 / 74-OR23-1A / CBS 708.71 / DSM 1257 / FGSC 987)	401			PS51371;	PF00571;	SM00116;		UPI000018B108
NCU01473	Q7RXV8	Q7RXV8_NEUCR	Mitochondrial large ribosomal subunit YmL35	NCU01473	Neurospora crassa (strain ATCC 24698 / 74-OR23-1A / CBS 708.71 / DSM 1257 / FGSC 987)	449	mitochondrial large ribosomal subunit [GO:0005762]; peptidase inhibitor activity [GO:0030414]; phospholipid binding [GO:0005543]; structural constituent of ribosome [GO:0003735]; regulation of Ras protein signal transduction [GO:0046578]			PF01161;		PTHR11362;PTHR11362:SF25;	UPI00015C3C41
NCU01474	V5IMN1	V5IMN1_NEUCR	60S ribosomal protein L4, variant	NCU01474	Neurospora crassa (strain ATCC 24698 / 74-OR23-1A / CBS 708.71 / DSM 1257 / FGSC 987)	325	ribosome [GO:0005840]; structural constituent of ribosome [GO:0003735]; translation [GO:0006412]			PF00573;		PTHR10746;	UPI0003CAA415
NCU01474	V5IPE9	V5IPE9_NEUCR	60S ribosomal protein L4	NCU01474	Neurospora crassa (strain ATCC 24698 / 74-OR23-1A / CBS 708.71 / DSM 1257 / FGSC 987)	349	ribosome [GO:0005840]; structural constituent of ribosome [GO:0003735]; translation [GO:0006412]			PF00573;		PTHR10746;	UPI000018B10B
NCU01479	Q7RVQ0	Q7RVQ0_NEUCR	Matrix AAA protease MAP-1	map-1 NCU01479	Neurospora crassa (strain ATCC 24698 / 74-OR23-1A / CBS 708.71 / DSM 1257 / FGSC 987)	928	m-AAA complex [GO:0005745]; mitochondrial inner membrane [GO:0005743]; ATP binding [GO:0005524]; metalloendopeptidase activity [GO:0004222]; zinc ion binding [GO:0008270]; cristae formation [GO:0042407]; mitochondrial fusion [GO:0008053]; mitochondrial protein processing [GO:0034982]		PS00674;	PF00004;PF06480;PF01434;	SM00382;		UPI000018B110
NCU01484	B2ZAG3	B2ZAG3_NEUCS	Rho-type GTPase (Fragment)	rho-1 GE21DRAFT_3503 NCU01484	Neurospora crassa	195	GTP binding [GO:0005525]; GTPase activity [GO:0003924]; small GTPase mediated signal transduction [GO:0007264]		PS51420;	PF00071;			UPI00015C3E82
NCU01484	Q7RXU8	Q7RXU8_NEUCR	Rho-type GTPase	rho-1 NCU01484	Neurospora crassa (strain ATCC 24698 / 74-OR23-1A / CBS 708.71 / DSM 1257 / FGSC 987)	195	cell cortex [GO:0005938]; cell division site [GO:0032153]; cytoplasm [GO:0005737]; intracellular membrane-bounded organelle [GO:0043231]; GTP binding [GO:0005525]; GTPase activity [GO:0003924]; protein kinase binding [GO:0019901]; actin filament bundle assembly [GO:0051017]; actin filament organization [GO:0007015]; establishment or maintenance of actin cytoskeleton polarity [GO:0030950]; regulat…		PS51420;	PF00071;			UPI00015C3E82
NCU01485	Q7RXU7	Q7RXU7_NEUCR	Uncharacterized protein	NCU01485	Neurospora crassa (strain ATCC 24698 / 74-OR23-1A / CBS 708.71 / DSM 1257 / FGSC 987)	396	mitochondrion [GO:0005739]; ribosome [GO:0005840]; structural constituent of ribosome [GO:0003735]; translation [GO:0006412]				SM00739;	PTHR12903;	UPI0003CA4F88
NCU01486	V5INF5	V5INF5_NEUCR	Elongator complex protein 1	NCU01486	Neurospora crassa (strain ATCC 24698 / 74-OR23-1A / CBS 708.71 / DSM 1257 / FGSC 987)	1342	cytoplasm [GO:0005737]; Elongator holoenzyme complex [GO:0033588]; nucleus [GO:0005634]; tRNA wobble uridine modification [GO:0002098]			PF04762;		PTHR12747;	UPI000018B117
NCU01487	Q7RXU5	Q7RXU5_NEUCR	Uncharacterized protein	NCU01487	Neurospora crassa (strain ATCC 24698 / 74-OR23-1A / CBS 708.71 / DSM 1257 / FGSC 987)	475				PF13136;			UPI000018B118
NCU01489	V5IQ72	V5IQ72_NEUCR	Histidine phosphotransferase-1	hpt-1 NCU01489	Neurospora crassa (strain ATCC 24698 / 74-OR23-1A / CBS 708.71 / DSM 1257 / FGSC 987)	159	cytoplasm [GO:0005737]; nucleus [GO:0005634]; histidine phosphotransfer kinase activity [GO:0009927]; protein histidine kinase binding [GO:0043424]; osmosensory signaling via phosphorelay pathway [GO:0007234]; phosphorelay signal transduction system [GO:0000160]; phosphorylation [GO:0016310]		PS50894;	PF01627;	SM00073;		UPI0003CB1C81
NCU01489	V5IR58	V5IR58_NEUCR	Histidine phosphotransferase-1, variant 1 (Histidine phosphotransferase-1, variant 2)	hpt-1 NCU01489	Neurospora crassa (strain ATCC 24698 / 74-OR23-1A / CBS 708.71 / DSM 1257 / FGSC 987)	145	transferase activity [GO:0016740]; phosphorelay signal transduction system [GO:0000160]		PS50894;	PF01627;	SM00073;		UPI000018B32C
NCU01500	V5IPL3	V5IPL3_NEUCR	Nicotinamide riboside kinase 1	NCU01500	Neurospora crassa (strain ATCC 24698 / 74-OR23-1A / CBS 708.71 / DSM 1257 / FGSC 987)	403	ribosylnicotinamide kinase activity [GO:0050262]; uridine kinase activity [GO:0004849]; nicotinamide nucleotide biosynthetic process [GO:0019359]					PTHR42666:SF1;	UPI0000069A3B
NCU01500	V5IR55	V5IR55_NEUCR	Nicotinamide riboside kinase 1, variant	NCU01500	Neurospora crassa (strain ATCC 24698 / 74-OR23-1A / CBS 708.71 / DSM 1257 / FGSC 987)	333	kinase activity [GO:0016301]						UPI0003CB0D84
NCU01501	F5HBQ5	F5HBQ5_NEUCR	Mitochondrial peptidyl-tRNA hydrolase Pth2	NCU01501	Neurospora crassa (strain ATCC 24698 / 74-OR23-1A / CBS 708.71 / DSM 1257 / FGSC 987)	330	cytosol [GO:0005829]; integral component of membrane [GO:0016021]; aminoacyl-tRNA hydrolase activity [GO:0004045]			PF01981;		PTHR12649;	UPI000017B4A8
NCU01502	Q1K5K9	Q1K5K9_NEUCR	Small nucleolar ribonucleoprotein complex subunit	NCU01502	Neurospora crassa (strain ATCC 24698 / 74-OR23-1A / CBS 708.71 / DSM 1257 / FGSC 987)	554	nucleolus [GO:0005730]; small-subunit processome [GO:0032040]; maturation of SSU-rRNA from tricistronic rRNA transcript (SSU-rRNA, 5.8S rRNA, LSU-rRNA) [GO:0000462]		PS00678;PS50082;PS50294;	PF08149;	SM01033;SM00320;	PTHR14085;	UPI000006B217
NCU01503	Q1K5K8	Q1K5K8_NEUCR	Pre-rRNA processing protein Tsr1	NCU01503	Neurospora crassa (strain ATCC 24698 / 74-OR23-1A / CBS 708.71 / DSM 1257 / FGSC 987)	817	nucleus [GO:0005634]; preribosome, small subunit precursor [GO:0030688]; GTP binding [GO:0005525]; GTPase activity [GO:0003924]; U3 snoRNA binding [GO:0034511]; maturation of SSU-rRNA from tricistronic rRNA transcript (SSU-rRNA, 5.8S rRNA, LSU-rRNA) [GO:0000462]		PS51714;	PF08142;PF04950;	SM00785;SM01362;	PTHR12858;	UPI000006A1FD
NCU01506	Q9P5T3	RRG9_NEUCR	Required for respiratory growth protein 9, mitochondrial	rrg9 B5O22.190 NCU01506	Neurospora crassa (strain ATCC 24698 / 74-OR23-1A / CBS 708.71 / DSM 1257 / FGSC 987)	329	mitochondrion [GO:0005739]; nucleus [GO:0005634]			PF06413;		PTHR13475;	UPI000006ABAE
NCU01511	Q1K5K4	Q1K5K4_NEUCR	Urease accessory protein ureG	NCU01511	Neurospora crassa (strain ATCC 24698 / 74-OR23-1A / CBS 708.71 / DSM 1257 / FGSC 987)	290	GTPase activity [GO:0003924]; nickel cation binding [GO:0016151]; urea metabolic process [GO:0019627]			PF02492;		PTHR31715;	UPI000006BB40
NCU01512	Q1K5K3	Q1K5K3_NEUCR	Phenylalanyl-tRNA synthetase	NCU01512	Neurospora crassa (strain ATCC 24698 / 74-OR23-1A / CBS 708.71 / DSM 1257 / FGSC 987)	517	cytoplasm [GO:0005737]; mitochondrion [GO:0005739]; ATP binding [GO:0005524]; phenylalanine-tRNA ligase activity [GO:0004826]; tRNA binding [GO:0000049]; phenylalanyl-tRNA aminoacylation [GO:0006432]		PS50862;PS51447;	PF03147;PF01409;	SM00896;	PTHR11538:SF41;	UPI000006AA33
NCU01514	Q1K5K2	Q1K5K2_NEUCR	Mitochondrial dicarboxylate carrier	NCU01514	Neurospora crassa (strain ATCC 24698 / 74-OR23-1A / CBS 708.71 / DSM 1257 / FGSC 987)	345	integral component of membrane [GO:0016021]; mitochondrial envelope [GO:0005740]; antiporter activity [GO:0015297]; malate transmembrane transporter activity [GO:0015140]; oxaloacetate transmembrane transporter activity [GO:0015131]; succinate transmembrane transporter activity [GO:0015141]; sulfate transmembrane transporter activity [GO:0015116]; thiosulfate transmembrane transporter activity [G…		PS50920;	PF00153;		PTHR24089;	UPI00015C359E
NCU01515	Q1K5K1	Q1K5K1_NEUCR	DNA-directed RNA polymerase II polypeptide	NCU01515	Neurospora crassa (strain ATCC 24698 / 74-OR23-1A / CBS 708.71 / DSM 1257 / FGSC 987)	337	RNA polymerase II, core complex [GO:0005665]; DNA binding [GO:0003677]; DNA-directed 5'-3' RNA polymerase activity [GO:0003899]; protein dimerization activity [GO:0046983]; transcription by RNA polymerase II [GO:0006366]		PS00446;	PF01000;PF01193;	SM00662;		UPI000006BADA
NCU01516	Q9P5U4	GRPE_NEUCR	GrpE protein homolog, mitochondrial	grpe mge1 B5O22.080 NCU01516	Neurospora crassa (strain ATCC 24698 / 74-OR23-1A / CBS 708.71 / DSM 1257 / FGSC 987)	238	PAM complex, Tim23 associated import motor [GO:0001405]; adenyl-nucleotide exchange factor activity [GO:0000774]; chaperone binding [GO:0051087]; protein homodimerization activity [GO:0042803]; unfolded protein binding [GO:0051082]; protein folding [GO:0006457]; protein import into mitochondrial matrix [GO:0030150]		PS01071;	PF01025;		PTHR21237;	UPI000006B1A8
NCU01523	F5H8U4	F5H8U4_NEUCR	GTP-binding protein ypt3	NCU01523	Neurospora crassa (strain ATCC 24698 / 74-OR23-1A / CBS 708.71 / DSM 1257 / FGSC 987)	214	endosome [GO:0005768]; recycling endosome [GO:0055037]; GTP binding [GO:0005525]; GTPase activity [GO:0003924]; exocytosis [GO:0006887]; intracellular protein transport [GO:0006886]; Rab protein signal transduction [GO:0032482]			PF00071;			UPI000006A36D
NCU01524	Q1K5J6	Q1K5J6_NEUCR	Ribosome biogenesis protein BRX1	NCU01524	Neurospora crassa (strain ATCC 24698 / 74-OR23-1A / CBS 708.71 / DSM 1257 / FGSC 987)	325	nucleolus [GO:0005730]; preribosome, large subunit precursor [GO:0030687]; 5S rRNA binding [GO:0008097]; rRNA primary transcript binding [GO:0042134]; endonucleolytic cleavage in ITS1 upstream of 5.8S rRNA from tricistronic rRNA transcript (SSU-rRNA, 5.8S rRNA, LSU-rRNA) [GO:0000464]; exonucleolytic trimming to generate mature 5'-end of 5.8S rRNA from tricistronic rRNA transcript (SSU-rRNA, 5.8S …		PS50833;	PF04427;	SM00879;	PTHR13634;	UPI000006C505
NCU01528	P54118	G3P_NEUCR	Glyceraldehyde-3-phosphate dehydrogenase (GAPDH) (EC 1.2.1.12) (Clock-controlled protein 7)	gpd-1 ccg-7 B9G16.70 NCU01528	Neurospora crassa (strain ATCC 24698 / 74-OR23-1A / CBS 708.71 / DSM 1257 / FGSC 987)	338	cytosol [GO:0005829]; glyceraldehyde-3-phosphate dehydrogenase (NAD+) (phosphorylating) activity [GO:0004365]; NAD binding [GO:0051287]; NADP binding [GO:0050661]; glucose metabolic process [GO:0006006]; glycolytic process [GO:0006096]		PS00071;	PF02800;PF00044;	SM00846;	PTHR10836;	UPI000006A3CE
NCU01540	Q7RWZ3	Q7RWZ3_NEUCR	SPX domain-containing protein	NCU01540	Neurospora crassa (strain ATCC 24698 / 74-OR23-1A / CBS 708.71 / DSM 1257 / FGSC 987)	844	integral component of membrane [GO:0016021]; inorganic phosphate transmembrane transporter activity [GO:0005315]; phosphate ion transport [GO:0006817]; polyphosphate metabolic process [GO:0006797]; sodium ion transport [GO:0006814]		PS51382;	PF00939;PF03105;			UPI000006A954
NCU01545	Q8WZY7	ATG8_NEUCR	Autophagy-related protein 8 (Autophagy-related ubiquitin-like modifier atg8)	apg-6 atg8 B24G3.150 NCU01545	Neurospora crassa (strain ATCC 24698 / 74-OR23-1A / CBS 708.71 / DSM 1257 / FGSC 987)	121	autophagosome membrane [GO:0000421]; cytoplasmic vesicle [GO:0031410]; fungal-type vacuole membrane [GO:0000329]; autophagy [GO:0006914]; cellular response to nitrogen starvation [GO:0006995]; protein transport [GO:0015031]			PF02991;		PTHR10969;	UPI0000069B80
NCU01546	F5H9D4	F5H9D4_NEUCR	Coproporphyrinogen III oxidase	NCU01546	Neurospora crassa (strain ATCC 24698 / 74-OR23-1A / CBS 708.71 / DSM 1257 / FGSC 987)	409	cytoplasm [GO:0005737]; cytosol [GO:0005829]; coproporphyrinogen oxidase activity [GO:0004109]; protoporphyrinogen IX biosynthetic process from glutamate [GO:0019353]			PF01218;		PTHR10755;	UPI000006C768
NCU01547	Q8WZY4	RPN8_NEUCR	26S proteasome regulatory subunit rpn-8	rpn-8 B24G3.180 NCU01547	Neurospora crassa (strain ATCC 24698 / 74-OR23-1A / CBS 708.71 / DSM 1257 / FGSC 987)	352	proteasome complex [GO:0000502]; proteasome regulatory particle [GO:0005838]; proteasome-mediated ubiquitin-dependent protein catabolic process [GO:0043161]		PS50249;	PF01398;PF13012;	SM00232;	PTHR10540:SF7;	UPI000006B7BA
NCU01548	Q8WZY3	YBG3_NEUCR	Uncharacterized protein B24G3.190	B24G3.190 NCU01548	Neurospora crassa (strain ATCC 24698 / 74-OR23-1A / CBS 708.71 / DSM 1257 / FGSC 987)	94	fungal-type vacuole [GO:0000324]; endopeptidase inhibitor activity [GO:0004866]; vacuole fusion, non-autophagic [GO:0042144]						UPI000006B32D
NCU01548	V5INN3	V5INN3_NEUCR	Uncharacterized protein	NCU01548	Neurospora crassa (strain ATCC 24698 / 74-OR23-1A / CBS 708.71 / DSM 1257 / FGSC 987)	96							UPI0003CAF21F
NCU01549	Q1K4Y5	Q1K4Y5_NEUCR	Uncharacterized protein	NCU01549	Neurospora crassa (strain ATCC 24698 / 74-OR23-1A / CBS 708.71 / DSM 1257 / FGSC 987)	748	centrosome [GO:0005813]; cytoplasm [GO:0005737]; dynein light intermediate chain binding [GO:0051959]; microtubule binding [GO:0008017]; cytoplasmic microtubule organization [GO:0031122]; cytoskeleton-dependent intracellular transport [GO:0030705]			PF05622;			UPI0003CA8E97
NCU01550	Q9HE76	KAD2_NEUCR	Adenylate kinase (EC 2.7.4.3) (ATP-AMP transphosphorylase) (ATP:AMP phosphotransferase) (Adenylate kinase cytosolic and mitochondrial) (Adenylate monophosphate kinase)	adk-1 B21O8.10 NCU01550	Neurospora crassa (strain ATCC 24698 / 74-OR23-1A / CBS 708.71 / DSM 1257 / FGSC 987)	278	cytosol [GO:0005829]; mitochondrial intermembrane space [GO:0005758]; adenylate kinase activity [GO:0004017]; ATP binding [GO:0005524]; ADP biosynthetic process [GO:0006172]; AMP metabolic process [GO:0046033]; ATP metabolic process [GO:0046034]		PS00113;	PF05191;		PTHR23359;	UPI000016892C
NCU01552	Q9HE74	RS23_NEUCR	40S ribosomal protein S23 (Cytoplasmic ribosomal protein 28)	crp-28 rps23 B21O8.30 NCU01552	Neurospora crassa (strain ATCC 24698 / 74-OR23-1A / CBS 708.71 / DSM 1257 / FGSC 987)	145	cytosolic small ribosomal subunit [GO:0022627]; structural constituent of ribosome [GO:0003735]; translation [GO:0006412]		PS00055;	PF00164;		PTHR11652;	UPI0000134E99
NCU01555	Q1K4Y1	Q1K4Y1_NEUCR	Uncharacterized protein	NCU01555	Neurospora crassa (strain ATCC 24698 / 74-OR23-1A / CBS 708.71 / DSM 1257 / FGSC 987)	196							UPI000052BFA4
NCU01568	Q1K4X1	Q1K4X1_NEUCR	Uncharacterized protein	NCU01568	Neurospora crassa (strain ATCC 24698 / 74-OR23-1A / CBS 708.71 / DSM 1257 / FGSC 987)	335	integral component of membrane [GO:0016021]; mitochondrial inner membrane [GO:0005743]; S-adenosyl-L-methionine transmembrane transporter activity [GO:0000095]		PS50920;	PF00153;		PTHR24089;	UPI000006ADF8
NCU01571	Q1K4W9	Q1K4W9_NEUCR	Uncharacterized protein	NCU01571	Neurospora crassa (strain ATCC 24698 / 74-OR23-1A / CBS 708.71 / DSM 1257 / FGSC 987)	419	cytoplasm [GO:0005737]; Rab-protein geranylgeranyltransferase complex [GO:0005968]; protein prenyltransferase activity [GO:0008318]; protein geranylgeranylation [GO:0018344]		PS51147;	PF01239;		PTHR11129:SF2;	UPI000006B967
NCU01585	Q7RXG4	Q7RXG4_NEUCR	Uncharacterized protein	NCU01585	Neurospora crassa (strain ATCC 24698 / 74-OR23-1A / CBS 708.71 / DSM 1257 / FGSC 987)	287	cytosolic small ribosomal subunit [GO:0022627]; structural constituent of ribosome [GO:0003735]		PS50053;				UPI00000695C6
NCU01587	V5IPJ8	V5IPJ8_NEUCR	Cofilin, variant	NCU01587	Neurospora crassa (strain ATCC 24698 / 74-OR23-1A / CBS 708.71 / DSM 1257 / FGSC 987)	154	actin cytoskeleton [GO:0015629]; actin binding [GO:0003779]; actin filament depolymerization [GO:0030042]		PS51263;	PF00241;	SM00102;	PTHR11913;	UPI000006A149
NCU01589	Q1K566	Q1K566_NEUCR	Heat shock protein 60	hsp60 NCU01589	Neurospora crassa (strain ATCC 24698 / 74-OR23-1A / CBS 708.71 / DSM 1257 / FGSC 987)	574	cytosol [GO:0005829]; mitochondrion [GO:0005739]; ATP binding [GO:0005524]; unfolded protein binding [GO:0051082]; 'de novo' protein folding [GO:0006458]; apoptotic mitochondrial changes [GO:0008637]; mitochondrion organization [GO:0007005]; protein import into mitochondrial intermembrane space [GO:0045041]; protein refolding [GO:0042026]		PS00296;	PF00118;			UPI000006B329
NCU01595	F5HCE4	F5HCE4_NEUCR	SOF1	NCU01595	Neurospora crassa (strain ATCC 24698 / 74-OR23-1A / CBS 708.71 / DSM 1257 / FGSC 987)	445	Cul4-RING E3 ubiquitin ligase complex [GO:0080008]; nucleolus [GO:0005730]; small-subunit processome [GO:0032040]; maturation of SSU-rRNA from tricistronic rRNA transcript (SSU-rRNA, 5.8S rRNA, LSU-rRNA) [GO:0000462]		PS00678;PS50082;PS50294;	PF04158;PF00400;	SM00320;		UPI000006C635
NCU01596	Q1K564	Q1K564_NEUCR	26S proteasome non-ATPase regulatory subunit 11	rpn-6 NCU01596	Neurospora crassa (strain ATCC 24698 / 74-OR23-1A / CBS 708.71 / DSM 1257 / FGSC 987)	424	proteasome regulatory particle, lid subcomplex [GO:0008541]; proteasome storage granule [GO:0034515]; structural molecule activity [GO:0005198]; proteasome assembly [GO:0043248]; ubiquitin-dependent protein catabolic process [GO:0006511]		PS50250;	PF01399;	SM00088;		UPI000006A296
NCU01601	Q1K562	Q1K562_NEUCR	U6 snRNA-associated Sm-like protein LSm1	LSM1 NCU01601	Neurospora crassa (strain ATCC 24698 / 74-OR23-1A / CBS 708.71 / DSM 1257 / FGSC 987)	188	Lsm1-7-Pat1 complex [GO:1990726]; mRNA cap binding complex [GO:0005845]; P-body [GO:0000932]; RNA binding [GO:0003723]; RNA cap binding [GO:0000339]; deadenylation-dependent decapping of nuclear-transcribed mRNA [GO:0000290]; mRNA processing [GO:0006397]; RNA metabolic process [GO:0016070]			PF01423;	SM00651;		UPI0003CA4337
NCU01606	Q9P602	ATPO_NEUCR	ATP synthase subunit 5, mitochondrial (ATP synthase chain 5) (Oligomycin sensitivity conferral protein) (OSCP)	atp-5 B2O8.150 NCU01606	Neurospora crassa (strain ATCC 24698 / 74-OR23-1A / CBS 708.71 / DSM 1257 / FGSC 987)	220	mitochondrial inner membrane [GO:0005743]; proton-transporting ATP synthase activity, rotational mechanism [GO:0046933]; ATP synthesis coupled proton transport [GO:0015986]		PS00389;	PF00213;		PTHR11910;	UPI00001265EB
NCU01612	Q1K557	Q1K557_NEUCR	Pre-mRNA splicing factor ATP-dependent RNA helicase PRP43	NCU01612	Neurospora crassa (strain ATCC 24698 / 74-OR23-1A / CBS 708.71 / DSM 1257 / FGSC 987)	774	post-mRNA release spliceosomal complex [GO:0071014]; ATP binding [GO:0005524]; ATP-dependent 3'-5' RNA helicase activity [GO:0034459]; RNA binding [GO:0003723]; maturation of 5.8S rRNA from tricistronic rRNA transcript (SSU-rRNA, 5.8S rRNA, LSU-rRNA) [GO:0000466]; maturation of LSU-rRNA from tricistronic rRNA transcript (SSU-rRNA, 5.8S rRNA, LSU-rRNA) [GO:0000463]; maturation of SSU-rRNA from tri…		PS00690;PS51192;PS51194;	PF00270;PF04408;PF00271;PF07717;	SM00487;SM00847;SM00490;		UPI000017B4CC
NCU01613	V5IND0	V5IND0_NEUCR	Protein arginine N-methyltransferase	pp-2 NCU01613	Neurospora crassa (strain ATCC 24698 / 74-OR23-1A / CBS 708.71 / DSM 1257 / FGSC 987)	605	methyltransferase activity [GO:0008168]; peptidyl-arginine N-methylation [GO:0035246]		PS51678;	PF05185;PF17286;PF17285;		PTHR10738;	UPI0003CADB2D
NCU01613	V5INM3	V5INM3_NEUCR	Protein arginine N-methyltransferase	pp-2 NCU01613	Neurospora crassa (strain ATCC 24698 / 74-OR23-1A / CBS 708.71 / DSM 1257 / FGSC 987)	798	cytosol [GO:0005829]; nucleus [GO:0005634]; histone-arginine N-methyltransferase activity [GO:0008469]; histone arginine methylation [GO:0034969]		PS51678;	PF05185;PF17286;PF17285;		PTHR10738;	UPI00015C36EE
NCU01614	Q9P5Z8	RUXF_NEUCR	Probable small nuclear ribonucleoprotein F (snRNP-F) (Sm protein F) (Sm-F) (SmF)	B2O8.190 NCU01614	Neurospora crassa (strain ATCC 24698 / 74-OR23-1A / CBS 708.71 / DSM 1257 / FGSC 987)	90	catalytic step 2 spliceosome [GO:0071013]; small nucleolar ribonucleoprotein complex [GO:0005732]; U1 snRNP [GO:0005685]; U2 snRNP [GO:0005686]; U4/U6 x U5 tri-snRNP complex [GO:0046540]; U5 snRNP [GO:0005682]; poly(U) RNA binding [GO:0008266]; RNA binding [GO:0003723]; splicing factor binding [GO:1990935]; mRNA splicing, via spliceosome [GO:0000398]; spliceosomal snRNP assembly [GO:0000387]			PF01423;	SM00651;	PTHR11021;	UPI000006C0A4
NCU01625	Q7RXF5	Q7RXF5_NEUCR	DNA repair helicase RAD3	NCU01625	Neurospora crassa (strain ATCC 24698 / 74-OR23-1A / CBS 708.71 / DSM 1257 / FGSC 987)	806	nucleotide-excision repair factor 3 complex [GO:0000112]; nucleus [GO:0005634]; transcription factor TFIIH core complex [GO:0000439]; transcription factor TFIIH holo complex [GO:0005675]; 4 iron, 4 sulfur cluster binding [GO:0051539]; ATP binding [GO:0005524]; ATP-dependent 5'-3' DNA helicase activity [GO:0043141]; ATP-dependent DNA helicase activity [GO:0004003]; damaged DNA binding [GO:0003684]…		PS51193;	PF06733;PF06777;PF13307;	SM00488;SM00491;	PTHR11472:SF1;	UPI000006A439
NCU01633	Q1K4S3	Q1K4S3_NEUCR	Hexose transporter HXT13	NCU01633	Neurospora crassa (strain ATCC 24698 / 74-OR23-1A / CBS 708.71 / DSM 1257 / FGSC 987)	532	integral component of plasma membrane [GO:0005887]; carbohydrate:proton symporter activity [GO:0005351]; hexose transmembrane transporter activity [GO:0015149]; carbohydrate import across plasma membrane [GO:0098704]		PS50850;PS00217;	PF00083;			UPI000006A59B
NCU01635	P07041	H3_NEUCR	Histone H3	hh3 B7K22.030 NCU01635	Neurospora crassa (strain ATCC 24698 / 74-OR23-1A / CBS 708.71 / DSM 1257 / FGSC 987)	136	nucleosome [GO:0000786]; nucleus [GO:0005634]; nucleosomal DNA binding [GO:0031492]; protein heterodimerization activity [GO:0046982]; nucleosome assembly [GO:0006334]; rRNA transcription [GO:0009303]		PS00322;PS00959;	PF00125;	SM00428;	PTHR11426;	UPI00000013A8
NCU01638	F5HFM2	F5HFM2_NEUCR	DNA-directed RNA polymerase subunit (EC 2.7.7.6)	NCU01638	Neurospora crassa (strain ATCC 24698 / 74-OR23-1A / CBS 708.71 / DSM 1257 / FGSC 987)	1701	RNA polymerase I complex [GO:0005736]; DNA binding [GO:0003677]; DNA-directed 5'-3' RNA polymerase activity [GO:0003899]; zinc ion binding [GO:0008270]; transcription by RNA polymerase I [GO:0006360]			PF04997;PF00623;PF04983;PF05000;PF04998;	SM00663;	PTHR19376:SF11;	UPI000006A4F4
NCU01642	Q7RWZ8	Q7RWZ8_NEUCR	Uncharacterized protein	NCU01642	Neurospora crassa (strain ATCC 24698 / 74-OR23-1A / CBS 708.71 / DSM 1257 / FGSC 987)	2640	regulation of GTPase activity [GO:0043087]; signal transduction [GO:0007165]		PS00509;PS50018;	PF13716;PF00616;	SM00323;	PTHR10194;	UPI0003CB827D
NCU01643	Q8WZX5	XRN2_NEUCR	5'-3' exoribonuclease 2 (EC 3.1.13.-) (Exoribonuclease 1)	exr-1 rat1 B7K22.110 NCU01643	Neurospora crassa (strain ATCC 24698 / 74-OR23-1A / CBS 708.71 / DSM 1257 / FGSC 987)	1072	nucleus [GO:0005634]; 5'-3' exoribonuclease activity [GO:0004534]; metal ion binding [GO:0046872]; rRNA binding [GO:0019843]; cleavage in ITS2 between 5.8S rRNA and LSU-rRNA of tricistronic rRNA transcript (SSU-rRNA, 5.8S rRNA, LSU-rRNA) [GO:0000448]; mRNA processing [GO:0006397]; negative regulation of phosphorylation of RNA polymerase II C-terminal domain [GO:1901408]; negative regulation of tr…			PF03159;		PTHR12341;	UPI0000069502
NCU01644	Q1K4Z6	Q1K4Z6_NEUCR	Intracellular protein transporter UsoA	NCU01644	Neurospora crassa (strain ATCC 24698 / 74-OR23-1A / CBS 708.71 / DSM 1257 / FGSC 987)	1171	endoplasmic reticulum [GO:0005783]; ER to Golgi transport vesicle membrane [GO:0012507]; Golgi membrane [GO:0000139]; Golgi stack [GO:0005795]; protein transporter activity [GO:0008565]; endoplasmic reticulum to Golgi vesicle-mediated transport [GO:0006888]; Golgi vesicle docking [GO:0048211]; intracellular protein transport [GO:0006886]; membrane fusion [GO:0061025]; transcytosis [GO:0045056]; v…			PF04871;PF04869;			UPI000006B74A
NCU01645	Q1K4Z5	Q1K4Z5_NEUCR	Uncharacterized protein	NCU01645	Neurospora crassa (strain ATCC 24698 / 74-OR23-1A / CBS 708.71 / DSM 1257 / FGSC 987)	313			PS01159;PS50020;	PF00397;	SM00456;		UPI00015C374E
NCU01647	Q7RVP4	Q7RVP4_NEUCR	GTP-binding protein ypt4	NCU01647	Neurospora crassa (strain ATCC 24698 / 74-OR23-1A / CBS 708.71 / DSM 1257 / FGSC 987)	298	cytosol [GO:0005829]; Golgi apparatus [GO:0005794]; phagocytic vesicle [GO:0045335]; recycling endosome [GO:0055037]; trans-Golgi network [GO:0005802]; GTP binding [GO:0005525]; GTPase activity [GO:0003924]; defense response to bacterium [GO:0042742]; endocytic recycling [GO:0032456]; Golgi to endosome transport [GO:0006895]; intracellular protein transport [GO:0006886]; phagosome maturation [GO:…			PF00071;		PTHR24073:SF654;	UPI000018B243
NCU01648	Q1K4Z4	Q1K4Z4_NEUCR	Dolichyl-phosphate-mannose-protein mannosyltransferase 2	NCU01648	Neurospora crassa (strain ATCC 24698 / 74-OR23-1A / CBS 708.71 / DSM 1257 / FGSC 987)	750	dolichyl-phosphate-mannose-protein mannosyltransferase Pmt1p-Pmt2p dimer complex [GO:0097582]; endoplasmic reticulum membrane [GO:0005789]; integral component of membrane [GO:0016021]; dolichyl-phosphate-mannose-protein mannosyltransferase activity [GO:0004169]; ER-associated misfolded protein catabolic process [GO:0071712]; fungal-type cell wall organization [GO:0031505]		PS50919;	PF02815;PF02366;PF16192;	SM00472;	PTHR10050;	UPI00015C374F
NCU01649	Q1K4Z3	Q1K4Z3_NEUCR	Uncharacterized protein	NCU01649	Neurospora crassa (strain ATCC 24698 / 74-OR23-1A / CBS 708.71 / DSM 1257 / FGSC 987)	287				PF12505;			UPI0003CB34E4
NCU01650	Q7RWZ7	Q7RWZ7_NEUCR	Uncharacterized protein	NCU01650	Neurospora crassa (strain ATCC 24698 / 74-OR23-1A / CBS 708.71 / DSM 1257 / FGSC 987)	201	mitochondrion [GO:0005739]; structural constituent of ribosome [GO:0003735]			PF05047;	SM00916;	PTHR13274;	UPI0003CAC493
NCU01652	Q1K4Z1	Q1K4Z1_NEUCR	O-acetylhomoserine	NCU01652	Neurospora crassa (strain ATCC 24698 / 74-OR23-1A / CBS 708.71 / DSM 1257 / FGSC 987)	454	pyridoxal phosphate binding [GO:0030170]; transferase activity, transferring alkyl or aryl (other than methyl) groups [GO:0016765]; cellular amino acid metabolic process [GO:0006520]		PS00868;	PF01053;			UPI000006B38E
NCU01654	Q7RWZ6	Q7RWZ6_NEUCR	Long-chain-fatty-acid-CoA ligase 1	NCU01654	Neurospora crassa (strain ATCC 24698 / 74-OR23-1A / CBS 708.71 / DSM 1257 / FGSC 987)	705	ligase activity [GO:0016874]		PS00455;	PF00501;			UPI0003CBDCCF
NCU01657	Q1K4Y9	Q1K4Y9_NEUCR	Cytochrome-c oxidase assembly protein	NCU01657	Neurospora crassa (strain ATCC 24698 / 74-OR23-1A / CBS 708.71 / DSM 1257 / FGSC 987)	315	integral component of membrane [GO:0016021]; copper ion binding [GO:0005507]			PF04442;			UPI0003CB9CC5
NCU01659	V5INL8	V5INL8_NEUCR	DDENN domain-containing protein, variant 1 (DDENN domain-containing protein, variant 2)	NCU01659	Neurospora crassa (strain ATCC 24698 / 74-OR23-1A / CBS 708.71 / DSM 1257 / FGSC 987)	1200	intracellular signal transduction [GO:0035556]		PS50211;PS50081;	PF03455;PF02141;PF03456;	SM00801;SM00799;SM00800;		UPI0003CB9B89
NCU01659	V5IPI7	V5IPI7_NEUCR	DDENN domain-containing protein	NCU01659	Neurospora crassa (strain ATCC 24698 / 74-OR23-1A / CBS 708.71 / DSM 1257 / FGSC 987)	1226	intracellular signal transduction [GO:0035556]		PS50211;PS50081;	PF03455;PF02141;PF03456;	SM00801;SM00799;SM00800;		UPI000006AC29
NCU01666	Q1K5I3	Q1K5I3_NEUCR	Acetolactate synthase small subunit	ilv-4 NCU01666	Neurospora crassa (strain ATCC 24698 / 74-OR23-1A / CBS 708.71 / DSM 1257 / FGSC 987)	330	acetolactate synthase complex [GO:0005948]; mitochondrial nucleoid [GO:0042645]; acetolactate synthase activity [GO:0003984]; enzyme regulator activity [GO:0030234]; branched-chain amino acid biosynthetic process [GO:0009082]		PS51671;	PF01842;PF10369;			UPI000006A619
NCU01667	Q1K5I2	Q1K5I2_NEUCR	Ornithine carbamoyltransferase	arg-12 NCU01667	Neurospora crassa (strain ATCC 24698 / 74-OR23-1A / CBS 708.71 / DSM 1257 / FGSC 987)	385	cytosol [GO:0005829]; mitochondrion [GO:0005739]; amino acid binding [GO:0016597]; ornithine carbamoyltransferase activity [GO:0004585]; arginine biosynthetic process via ornithine [GO:0042450]; citrulline biosynthetic process [GO:0019240]		PS00097;	PF00185;PF02729;			UPI0003CB52DB
NCU01669	Q1K5I1	Q1K5I1_NEUCR	Protein arginine methyltransferase RmtB	prm-3 NCU01669	Neurospora crassa (strain ATCC 24698 / 74-OR23-1A / CBS 708.71 / DSM 1257 / FGSC 987)	587	cytosol [GO:0005829]; nucleus [GO:0005634]; histone-arginine N-methyltransferase activity [GO:0008469]; protein-arginine omega-N asymmetric methyltransferase activity [GO:0035242]; histone arginine methylation [GO:0034969]; peptidyl-arginine methylation, to asymmetrical-dimethyl arginine [GO:0019919]; regulation of transcription, DNA-templated [GO:0006355]		PS51678;				UPI00015C34B4
NCU01674	Q9P6A5	SEC17_NEUCR	Probable vesicular-fusion protein sec17 homolog	B1D1.150 NCU01674	Neurospora crassa (strain ATCC 24698 / 74-OR23-1A / CBS 708.71 / DSM 1257 / FGSC 987)	292	SNARE complex [GO:0031201]; vacuolar membrane [GO:0005774]; soluble NSF attachment protein activity [GO:0005483]; syntaxin binding [GO:0019905]; intracellular protein transport [GO:0006886]; SNARE complex disassembly [GO:0035494]					PTHR13768;	UPI00001355C5
NCU01675	Q1K5H7	Q1K5H7_NEUCR	Ribosomal RNA-processing protein 12	NCU01675	Neurospora crassa (strain ATCC 24698 / 74-OR23-1A / CBS 708.71 / DSM 1257 / FGSC 987)	1275	nucleus [GO:0005634]; preribosome, small subunit precursor [GO:0030688]; maturation of SSU-rRNA from tricistronic rRNA transcript (SSU-rRNA, 5.8S rRNA, LSU-rRNA) [GO:0000462]			PF08161;			UPI000006B2D3
NCU01680	P07038	PMA1_NEUCR	Plasma membrane ATPase (EC 7.1.2.1) (Proton pump)	pma-1 B1D1.210 NCU01680	Neurospora crassa (strain ATCC 24698 / 74-OR23-1A / CBS 708.71 / DSM 1257 / FGSC 987)	920	integral component of membrane [GO:0016021]; plasma membrane [GO:0005886]; ATP binding [GO:0005524]; metal ion binding [GO:0046872]; proton-exporting ATPase activity, phosphorylative mechanism [GO:0008553]; proton export across plasma membrane [GO:0120029]; proton transmembrane transport [GO:1902600]; regulation of intracellular pH [GO:0051453]		PS00154;	PF00690;	SM00831;		UPI0000112613
NCU01689	V5INA9	V5INA9_NEUCR	Mitochondrial DNA replication protein YHM2, variant	NCU01689	Neurospora crassa (strain ATCC 24698 / 74-OR23-1A / CBS 708.71 / DSM 1257 / FGSC 987)	275	integral component of membrane [GO:0016021]; transmembrane transporter activity [GO:0022857]		PS50920;	PF00153;		PTHR24089;	UPI0003CA83E4
NCU01689	V5INK3	V5INK3_NEUCR	Mitochondrial DNA replication protein YHM2	NCU01689	Neurospora crassa (strain ATCC 24698 / 74-OR23-1A / CBS 708.71 / DSM 1257 / FGSC 987)	316	integral component of membrane [GO:0016021]; mitochondrial nucleoid [GO:0042645]; mitochondrion [GO:0005739]; DNA binding [GO:0003677]; tricarboxylate secondary active transmembrane transporter activity [GO:0005371]; alpha-ketoglutarate transport [GO:0015742]; mitochondrial citrate transmembrane transport [GO:0006843]; mitochondrial genome maintenance [GO:0000002]		PS50920;	PF00153;		PTHR24089;	UPI000006C074
NCU01692	P34085	CISY_NEUCR	Citrate synthase, mitochondrial (EC 2.3.3.16)	cit-1 B1D1.330 NCU01692	Neurospora crassa (strain ATCC 24698 / 74-OR23-1A / CBS 708.71 / DSM 1257 / FGSC 987)	469	mitochondrial matrix [GO:0005759]; citrate (Si)-synthase activity [GO:0004108]; carbohydrate metabolic process [GO:0005975]; tricarboxylic acid cycle [GO:0006099]		PS00480;	PF00285;		PTHR11739;	UPI0000069F8B
NCU01695	Q7RY25	Q7RY25_NEUCR	RNA binding protein Nrd1	NCU01695	Neurospora crassa (strain ATCC 24698 / 74-OR23-1A / CBS 708.71 / DSM 1257 / FGSC 987)	739	nucleus [GO:0005634]; RNA binding [GO:0003723]		PS51391;PS50102;	PF04818;PF00076;	SM00582;SM00360;		UPI000006A86C
NCU01696	Q7RY24	Q7RY24_NEUCR	mRNA cleavage factor complex component Pcf11	NCU01696	Neurospora crassa (strain ATCC 24698 / 74-OR23-1A / CBS 708.71 / DSM 1257 / FGSC 987)	817	cytoplasm [GO:0005737]; mRNA cleavage factor complex [GO:0005849]; mRNA binding [GO:0003729]; RNA polymerase II complex binding [GO:0000993]; mRNA polyadenylation [GO:0006378]; termination of RNA polymerase II transcription [GO:0006369]		PS51391;		SM00582;		UPI000018B0C7
NCU01698	Q1K5H1	Q1K5H1_NEUCR	4F5 family protein	NCU01698	Neurospora crassa (strain ATCC 24698 / 74-OR23-1A / CBS 708.71 / DSM 1257 / FGSC 987)	62				PF04419;		PTHR13596;	UPI000006B89E
NCU01701	V5IPH8	V5IPH8_NEUCR	Ribitol kinase	NCU01701	Neurospora crassa (strain ATCC 24698 / 74-OR23-1A / CBS 708.71 / DSM 1257 / FGSC 987)	598	D-ribulokinase activity [GO:0019150]; pentose metabolic process [GO:0019321]			PF02782;PF00370;			UPI0003CBD6E5
NCU01701	V5IR37	V5IR37_NEUCR	Ribitol kinase, variant	NCU01701	Neurospora crassa (strain ATCC 24698 / 74-OR23-1A / CBS 708.71 / DSM 1257 / FGSC 987)	451	kinase activity [GO:0016301]; phosphotransferase activity, alcohol group as acceptor [GO:0016773]; carbohydrate metabolic process [GO:0005975]			PF02782;			UPI0003CB5E9F
NCU01702	Q7RVQ2	Q7RVQ2_NEUCR	Nuclear pore protein	NCU01702	Neurospora crassa (strain ATCC 24698 / 74-OR23-1A / CBS 708.71 / DSM 1257 / FGSC 987)	1161	nuclear pore [GO:0005643]; structural constituent of nuclear pore [GO:0017056]; poly(A)+ mRNA export from nucleus [GO:0016973]; protein import into nucleus [GO:0006606]			PF04097;PF13634;		PTHR11225;	UPI000018B0CB
NCU01704	Q1K5G9	Q1K5G9_NEUCR	NADP:D-xylose dehydrogenase	NCU01704	Neurospora crassa (strain ATCC 24698 / 74-OR23-1A / CBS 708.71 / DSM 1257 / FGSC 987)	392	oxidoreductase activity [GO:0016491]			PF01408;			UPI000006B022
NCU01720	Q1K4T9	Q1K4T9_NEUCR	Uncharacterized protein	NCU01720	Neurospora crassa (strain ATCC 24698 / 74-OR23-1A / CBS 708.71 / DSM 1257 / FGSC 987)	373	fungal-type cell wall [GO:0009277]; fungal-type cell wall polysaccharide metabolic process [GO:0071966]			PF11790;			UPI000006BBBC
NCU01722	V5INA4	V5INA4_NEUCR	Uncharacterized protein	NCU01722	Neurospora crassa (strain ATCC 24698 / 74-OR23-1A / CBS 708.71 / DSM 1257 / FGSC 987)	1402	integral component of membrane [GO:0016021]		PS50297;PS50088;	PF01833;	SM00248;		UPI0003CB21F6
NCU01722	V5IQ33	V5IQ33_NEUCR	Uncharacterized protein	NCU01722	Neurospora crassa (strain ATCC 24698 / 74-OR23-1A / CBS 708.71 / DSM 1257 / FGSC 987)	1401	integral component of membrane [GO:0016021]		PS50297;PS50088;	PF01833;	SM00248;		UPI0003CAD0CF
NCU01725	Q1K4T6	Q1K4T6_NEUCR	Uncharacterized protein	NCU01725	Neurospora crassa (strain ATCC 24698 / 74-OR23-1A / CBS 708.71 / DSM 1257 / FGSC 987)	415	tRNA-specific adenosine-34 deaminase complex [GO:0052718]; tRNA-specific adenosine-34 deaminase activity [GO:0052717]; tRNA wobble adenosine to inosine editing [GO:0002100]		PS51747;	PF00383;			UPI000006A058
NCU01728	V5INJ7	V5INJ7_NEUCR	6-phosphofructo-2-kinase	NCU01728	Neurospora crassa (strain ATCC 24698 / 74-OR23-1A / CBS 708.71 / DSM 1257 / FGSC 987)	804	cytosol [GO:0005829]; 6-phosphofructo-2-kinase activity [GO:0003873]; ATP binding [GO:0005524]; fructose 2,6-bisphosphate metabolic process [GO:0006003]; fructose metabolic process [GO:0006000]		PS00175;	PF01591;PF00300;	SM00855;	PTHR10606;	UPI000006A082
NCU01728	V5IR35	V5IR35_NEUCR	6-phosphofructo-2-kinase, variant	NCU01728	Neurospora crassa (strain ATCC 24698 / 74-OR23-1A / CBS 708.71 / DSM 1257 / FGSC 987)	748	6-phosphofructo-2-kinase activity [GO:0003873]; ATP binding [GO:0005524]; fructose 2,6-bisphosphate metabolic process [GO:0006003]; fructose metabolic process [GO:0006000]		PS00175;	PF01591;PF00300;	SM00855;	PTHR10606;	UPI0003CA83DB
NCU01737	F5HG24	F5HG24_NEUCR	Uncharacterized protein	NCU01737	Neurospora crassa (strain ATCC 24698 / 74-OR23-1A / CBS 708.71 / DSM 1257 / FGSC 987)	1051	GID complex [GO:0034657]; proteasome-mediated ubiquitin-dependent protein catabolic process [GO:0043161]			PF00514;	SM00185;	PTHR15651;	UPI000006A859
NCU01739	Q1K5S3	Q1K5S3_NEUCR	Uncharacterized protein	NCU01739	Neurospora crassa (strain ATCC 24698 / 74-OR23-1A / CBS 708.71 / DSM 1257 / FGSC 987)	206							UPI000006A846
NCU01744	V5IN94	V5IN94_NEUCR	Glutamate synthase, variant	en(am)-2 NCU01744	Neurospora crassa (strain ATCC 24698 / 74-OR23-1A / CBS 708.71 / DSM 1257 / FGSC 987)	2116	3 iron, 4 sulfur cluster binding [GO:0051538]; flavin adenine dinucleotide binding [GO:0050660]; FMN binding [GO:0010181]; glutamate synthase (NADH) activity [GO:0016040]; iron ion binding [GO:0005506]; oxidoreductase activity [GO:0016491]; ammonia assimilation cycle [GO:0019676]; glutamate biosynthetic process [GO:0006537]		PS51278;	PF14691;PF00310;PF04898;PF01645;PF01493;PF07992;			UPI000006996B
NCU01745	Q1K5R9	Q1K5R9_NEUCR	SPX domain-containing protein	NCU01745	Neurospora crassa (strain ATCC 24698 / 74-OR23-1A / CBS 708.71 / DSM 1257 / FGSC 987)	800	fungal-type vacuole membrane [GO:0000329]; integral component of membrane [GO:0016021]; vacuolar transporter chaperone complex [GO:0033254]		PS51382;	PF02656;PF09359;			UPI000006A3A3
NCU01747	Q1K5R7	Q1K5R7_NEUCR	Glycerophosphocholine phosphodiesterase Gde1	NCU01747	Neurospora crassa (strain ATCC 24698 / 74-OR23-1A / CBS 708.71 / DSM 1257 / FGSC 987)	1245	glycerophosphocholine phosphodiesterase activity [GO:0047389]; glycerophospholipid catabolic process [GO:0046475]		PS50297;PS50088;PS51704;PS51382;	PF12796;PF03009;PF03105;	SM00248;	PTHR22958:SF1;	UPI000006BA2B
NCU01748	Q7RYK0	Q7RYK0_NEUCR	Uncharacterized protein	NCU01748	Neurospora crassa (strain ATCC 24698 / 74-OR23-1A / CBS 708.71 / DSM 1257 / FGSC 987)	460			PS01159;PS50020;	PF00397;	SM00456;		UPI000018B012
NCU01754	Q9P6C8	ADH1_NEUCR	Alcohol dehydrogenase 1 (EC 1.1.1.1) (Alcohol dehydrogenase I)	adh-1 B17C10.210 NCU01754	Neurospora crassa (strain ATCC 24698 / 74-OR23-1A / CBS 708.71 / DSM 1257 / FGSC 987)	353	cytoplasm [GO:0005737]; alcohol dehydrogenase (NAD) activity [GO:0004022]; zinc ion binding [GO:0008270]; ethanol metabolic process [GO:0006067]; NADH oxidation [GO:0006116]		PS00059;	PF08240;PF00107;	SM00829;		UPI0000125551
NCU01754	V5IR31	V5IR31_NEUCR	Alcohol dehydrogenase I, variant	adh-1 NCU01754	Neurospora crassa (strain ATCC 24698 / 74-OR23-1A / CBS 708.71 / DSM 1257 / FGSC 987)	327	oxidoreductase activity [GO:0016491]; zinc ion binding [GO:0008270]		PS00059;	PF08240;PF00107;	SM00829;		UPI0003CB86E1
NCU01756	P78712	ARP3_NEUCR	Actin-related protein 3 (Actin-like protein 3)	arp-3 arp3 B17C10.190 NCU01756	Neurospora crassa (strain ATCC 24698 / 74-OR23-1A / CBS 708.71 / DSM 1257 / FGSC 987)	439	Arp2/3 protein complex [GO:0005885]; cytoplasm [GO:0005737]; actin binding [GO:0003779]; ATP binding [GO:0005524]; Arp2/3 complex-mediated actin nucleation [GO:0034314]		PS01132;	PF00022;	SM00268;	PTHR11937;PTHR11937:SF175;	UPI000012605C
NCU01759	Q1K5R1	Q1K5R1_NEUCR	Aldo-keto reductase family 1 member C13	mig-5 NCU01759	Neurospora crassa (strain ATCC 24698 / 74-OR23-1A / CBS 708.71 / DSM 1257 / FGSC 987)	322	cytosol [GO:0005829]; alcohol dehydrogenase (NADP+) activity [GO:0008106]; alditol:NADP+ 1-oxidoreductase activity [GO:0004032]; oxidoreductase activity [GO:0016491]		PS00062;	PF00248;		PTHR11732;	UPI0000069ECE
NCU01761	Q1K5R0	Q1K5R0_NEUCR	Uncharacterized protein	NCU01761	Neurospora crassa (strain ATCC 24698 / 74-OR23-1A / CBS 708.71 / DSM 1257 / FGSC 987)	108				PF08293;		PTHR13362;	UPI0003CAB087
NCU01765	P24918	NDUS1_NEUCR	NADH-ubiquinone oxidoreductase 78 kDa subunit, mitochondrial (EC 1.6.99.3) (EC 7.1.1.2) (Complex I-78kD) (CI-78kD)	nuo78 B17C10.90 NCU01765	Neurospora crassa (strain ATCC 24698 / 74-OR23-1A / CBS 708.71 / DSM 1257 / FGSC 987)	744	mitochondrial respiratory chain complex I [GO:0005747]; plasma membrane respiratory chain complex I [GO:0045272]; 2 iron, 2 sulfur cluster binding [GO:0051537]; 4 iron, 4 sulfur cluster binding [GO:0051539]; electron transfer activity [GO:0009055]; metal ion binding [GO:0046872]; NADH dehydrogenase (ubiquinone) activity [GO:0008137]; ATP synthesis coupled electron transport [GO:0042773]; cellular…		PS51085;PS51839;PS51669;PS00641;PS00642;PS00643;	PF00384;PF10588;PF09326;	SM00929;		UPI000013089E
NCU01766	V5IN89	V5IN89_NEUCR	Uncharacterized protein	NCU01766	Neurospora crassa (strain ATCC 24698 / 74-OR23-1A / CBS 708.71 / DSM 1257 / FGSC 987)	214							UPI0003CAF79D
NCU01766	V5INI4	V5INI4_NEUCR	Uncharacterized protein	NCU01766	Neurospora crassa (strain ATCC 24698 / 74-OR23-1A / CBS 708.71 / DSM 1257 / FGSC 987)	252							UPI0000069F96
NCU01767	F5HHC3	F5HHC3_NEUCR	Phophatase 2C family protein	NCU01767	Neurospora crassa (strain ATCC 24698 / 74-OR23-1A / CBS 708.71 / DSM 1257 / FGSC 987)	622	mitochondrion [GO:0005739]; [pyruvate dehydrogenase (lipoamide)] phosphatase activity [GO:0004741]; magnesium-dependent protein serine/threonine phosphatase activity [GO:0004724]; protein serine/threonine phosphatase activity [GO:0004722]; positive regulation of pyruvate dehydrogenase activity [GO:1904184]		PS51746;	PF00481;	SM00332;	PTHR13832;	UPI000017979D
NCU01768	Q7RU87	Q7RU87_NEUCR	Uncharacterized protein	NCU01768	Neurospora crassa (strain ATCC 24698 / 74-OR23-1A / CBS 708.71 / DSM 1257 / FGSC 987)	1048	mannosyl-oligosaccharide glucosidase activity [GO:0004573]; oligosaccharide metabolic process [GO:0009311]			PF03200;		PTHR10412;	UPI0003CB7670
NCU01772	Q1K5Q5	Q1K5Q5_NEUCR	DNA-directed RNA polymerase subunit beta (EC 2.7.7.6)	NCU01772	Neurospora crassa (strain ATCC 24698 / 74-OR23-1A / CBS 708.71 / DSM 1257 / FGSC 987)	1155	RNA polymerase III complex [GO:0005666]; DNA binding [GO:0003677]; DNA-directed 5'-3' RNA polymerase activity [GO:0003899]; ribonucleoside binding [GO:0032549]; transcription by RNA polymerase III [GO:0006383]		PS01166;	PF04563;PF04561;PF04565;PF04566;PF04567;PF00562;PF04560;		PTHR20856;	UPI000006BD4E
NCU01776	Q8X034	RL15_NEUCR	60S ribosomal protein L15	rpl-15 B21D9.030 NCU01776	Neurospora crassa (strain ATCC 24698 / 74-OR23-1A / CBS 708.71 / DSM 1257 / FGSC 987)	203	cytosolic large ribosomal subunit [GO:0022625]; RNA binding [GO:0003723]; structural constituent of ribosome [GO:0003735]; cytoplasmic translation [GO:0002181]		PS01194;	PF00827;	SM01384;	PTHR11847;	UPI000006B4DD
NCU01782	Q7RYJ8	Q7RYJ8_NEUCR	Ras guanyl-nucleotide exchange factor RasGEF	NCU01782	Neurospora crassa (strain ATCC 24698 / 74-OR23-1A / CBS 708.71 / DSM 1257 / FGSC 987)	1083	guanyl-nucleotide exchange factor activity [GO:0005085]; small GTPase mediated signal transduction [GO:0007264]		PS50009;PS50212;	PF00617;PF00618;	SM00147;SM00229;	PTHR23113;	UPI0003CB1FC6
NCU01785	Q1K4Q9	Q1K4Q9_NEUCR	Uncharacterized protein	NCU01785	Neurospora crassa (strain ATCC 24698 / 74-OR23-1A / CBS 708.71 / DSM 1257 / FGSC 987)	157	RNA polymerase III complex [GO:0005666]; catalytic activity [GO:0003824]; nucleotide binding [GO:0000166]; transcription initiation from RNA polymerase III promoter [GO:0006384]			PF03874;		PTHR15561;	UPI000006AC47
NCU01786	Q1K4Q8	Q1K4Q8_NEUCR	Ribose-phosphate pyrophosphokinase II	NCU01786	Neurospora crassa (strain ATCC 24698 / 74-OR23-1A / CBS 708.71 / DSM 1257 / FGSC 987)	412	cytoplasm [GO:0005737]; ribose phosphate diphosphokinase complex [GO:0002189]; kinase activity [GO:0016301]; magnesium ion binding [GO:0000287]; ribose phosphate diphosphokinase activity [GO:0004749]; 5-phosphoribose 1-diphosphate biosynthetic process [GO:0006015]; fungal-type cell wall organization [GO:0031505]; nucleoside metabolic process [GO:0009116]; nucleotide biosynthetic process [GO:00091…		PS00114;	PF14572;PF13793;		PTHR10210;	UPI00021DA60E
NCU01792	F5HII2	F5HII2_NEUCR	Heat shock protein 90-associated	hsp90a NCU01792	Neurospora crassa (strain ATCC 24698 / 74-OR23-1A / CBS 708.71 / DSM 1257 / FGSC 987)	216	cytoplasm [GO:0005737]; cytosol [GO:0005829]; nucleus [GO:0005634]; chaperone binding [GO:0051087]; Hsp90 protein binding [GO:0051879]; chaperone-mediated protein complex assembly [GO:0051131]; protein folding [GO:0006457]		PS51203;	PF04969;			UPI000006A64D
NCU01793	Q1K554	Q1K554_NEUCR	RNA binding domain-containing protein	NCU01793	Neurospora crassa (strain ATCC 24698 / 74-OR23-1A / CBS 708.71 / DSM 1257 / FGSC 987)	249	RNA binding [GO:0003723]		PS50102;	PF00076;	SM01218;SM00360;		UPI000006B8E2
NCU01795	Q1K552	Q1K552_NEUCR	Zinc finger containing protein	NCU01795	Neurospora crassa (strain ATCC 24698 / 74-OR23-1A / CBS 708.71 / DSM 1257 / FGSC 987)	355	cytosol [GO:0005829]; metal ion binding [GO:0046872]; polysome binding [GO:1905538]; cytoplasmic translation [GO:0002181]; poly(A)+ mRNA export from nucleus [GO:0016973]		PS50103;	PF16543;PF00642;	SM00356;		UPI000006BCDB
NCU01797	O42626	NRC2_NEUCR	Serine/threonine-protein kinase nrc-2 (EC 2.7.11.1) (Non-repressible conidiation protein 2)	nrc-2 B1K11.130 NCU01797	Neurospora crassa (strain ATCC 24698 / 74-OR23-1A / CBS 708.71 / DSM 1257 / FGSC 987)	623	cytoplasm [GO:0005737]; nucleus [GO:0005634]; plasma membrane [GO:0005886]; ATP binding [GO:0005524]; protein serine/threonine kinase activity [GO:0004674]; conidium formation [GO:0048315]; protein phosphorylation [GO:0006468]; sporulation resulting in formation of a cellular spore [GO:0030435]		PS50011;PS00108;	PF00069;	SM00220;		UPI00001304C2
NCU01800	Q1K548	Q1K548_NEUCR	37S ribosomal protein S5	NCU01800	Neurospora crassa (strain ATCC 24698 / 74-OR23-1A / CBS 708.71 / DSM 1257 / FGSC 987)	477	mitochondrial small ribosomal subunit [GO:0005763]; RNA binding [GO:0003723]; structural constituent of ribosome [GO:0003735]; translation [GO:0006412]		PS50881;	PF00333;PF03719;		PTHR13718;	UPI000006B81A
NCU01804	Q1K544	Q1K544_NEUCR	Nudix/MutT family protein	NCU01804	Neurospora crassa (strain ATCC 24698 / 74-OR23-1A / CBS 708.71 / DSM 1257 / FGSC 987)	164	cytoplasm [GO:0005737]; nucleus [GO:0005634]; bis(5'-adenosyl)-hexaphosphatase activity [GO:0034431]; bis(5'-adenosyl)-pentaphosphatase activity [GO:0034432]; diphosphoinositol-polyphosphate diphosphatase activity [GO:0008486]; endopolyphosphatase activity [GO:0000298]; m7G(5')pppN diphosphatase activity [GO:0050072]; adenosine 5'-(hexahydrogen pentaphosphate) catabolic process [GO:1901911]; diad…		PS51462;PS00893;	PF00293;			UPI000006B2F0
NCU01807	Q1K541	Q1K541_NEUCR	Uncharacterized protein	NCU01807	Neurospora crassa (strain ATCC 24698 / 74-OR23-1A / CBS 708.71 / DSM 1257 / FGSC 987)	245							UPI0000069B66
NCU01808	P00048	CYC_NEUCR	Cytochrome c	cyc-1 cyt-12 B1K11.020 NCU01808	Neurospora crassa (strain ATCC 24698 / 74-OR23-1A / CBS 708.71 / DSM 1257 / FGSC 987)	108	mitochondrial intermembrane space [GO:0005758]; respirasome [GO:0070469]; electron transfer activity [GO:0009055]; heme binding [GO:0020037]; metal ion binding [GO:0046872]; mitochondrial electron transport, cytochrome c to oxygen [GO:0006123]; mitochondrial electron transport, ubiquinol to cytochrome c [GO:0006122]		PS51007;	PF00034;		PTHR11961;	UPI000016892B
NCU01809	Q1K540	Q1K540_NEUCR	AAA family ATPase/60S ribosome export protein Rix7	NCU01809	Neurospora crassa (strain ATCC 24698 / 74-OR23-1A / CBS 708.71 / DSM 1257 / FGSC 987)	884	nucleus [GO:0005634]; ATP binding [GO:0005524]; ATPase activity [GO:0016887]; preribosome binding [GO:1990275]; positive regulation of telomerase activity [GO:0051973]; ribosome biogenesis [GO:0042254]		PS00674;	PF00004;	SM00382;		UPI000006C0A9
NCU01816	P18407	ALLC_NEUCR	Allantoicase (EC 3.5.3.4)	alc-1 alc B8B8.070 NCU01816	Neurospora crassa (strain ATCC 24698 / 74-OR23-1A / CBS 708.71 / DSM 1257 / FGSC 987)	354	allantoicase activity [GO:0004037]; allantoin catabolic process [GO:0000256]; purine nucleobase metabolic process [GO:0006144]			PF03561;		PTHR12045;	UPI000000D318
NCU01817	Q1K534	Q1K534_NEUCR	DIL and Ankyrin domain-containing protein	NCU01817	Neurospora crassa (strain ATCC 24698 / 74-OR23-1A / CBS 708.71 / DSM 1257 / FGSC 987)	848			PS50297;PS50088;PS51126;	PF12796;PF01843;	SM00248;SM01132;		UPI000000D317
NCU01820	Q7RWC2	Q7RWC2_NEUCR	Exportin-1	NCU01820	Neurospora crassa (strain ATCC 24698 / 74-OR23-1A / CBS 708.71 / DSM 1257 / FGSC 987)	1078	cytoplasm [GO:0005737]; kinetochore [GO:0000776]; nuclear periphery [GO:0034399]; nucleus [GO:0005634]; spindle pole body [GO:0005816]; nuclear export signal receptor activity [GO:0005049]; protein transporter activity [GO:0008565]; Ran GTPase binding [GO:0008536]; cellular response to oxidative stress [GO:0034599]; mRNA export from nucleus [GO:0006406]; protein localization to kinetochore [GO:00…		PS50166;	PF08767;PF03810;PF08389;	SM01102;SM00913;		UPI00015C368F
NCU01821	Q7RWC1	Q7RWC1_NEUCR	Alanine-glyoxylate aminotransferase	NCU01821	Neurospora crassa (strain ATCC 24698 / 74-OR23-1A / CBS 708.71 / DSM 1257 / FGSC 987)	446	peroxisome [GO:0005777]; alanine-glyoxylate transaminase activity [GO:0008453]; serine-pyruvate transaminase activity [GO:0004760]; glycine biosynthetic process, by transamination of glyoxylate [GO:0019265]			PF00266;			UPI000018B331
NCU01822	Q7RWC0	Q7RWC0_NEUCR	Vacuolar protein sorting-associated protein 29	NCU01822	Neurospora crassa (strain ATCC 24698 / 74-OR23-1A / CBS 708.71 / DSM 1257 / FGSC 987)	239	cytosol [GO:0005829]; endosome [GO:0005768]; retromer complex [GO:0030904]; intracellular protein transport [GO:0006886]; retrograde transport, endosome to Golgi [GO:0042147]			PF12850;		PTHR11124;PTHR11124:SF12;	UPI000018B332
NCU01824	Q1K582	Q1K582_NEUCR	UDP-galactopyranose mutase	NCU01824	Neurospora crassa (strain ATCC 24698 / 74-OR23-1A / CBS 708.71 / DSM 1257 / FGSC 987)	517	oxidoreductase activity [GO:0016491]			PF01593;			UPI000000D2A4
NCU01826	Q1K581	Q1K581_NEUCR	DUF250 domain membrane protein	NCU01826	Neurospora crassa (strain ATCC 24698 / 74-OR23-1A / CBS 708.71 / DSM 1257 / FGSC 987)	399	endosome [GO:0005768]; Golgi apparatus [GO:0005794]; integral component of membrane [GO:0016021]; trans-Golgi network [GO:0005802]; antiporter activity [GO:0015297]; transmembrane transporter activity [GO:0022857]			PF03151;		PTHR11132;	UPI000000D2A3
NCU01827	Q1K580	Q1K580_NEUCR	60S ribosomal protein L27	NCU01827	Neurospora crassa (strain ATCC 24698 / 74-OR23-1A / CBS 708.71 / DSM 1257 / FGSC 987)	135	cytosolic large ribosomal subunit [GO:0022625]; structural constituent of ribosome [GO:0003735]; translation [GO:0006412]		PS01107;	PF01777;		PTHR10497;	UPI000000D2A2
NCU01828	Q7RXN1	Q7RXN1_NEUCR	Uncharacterized protein	NCU01828	Neurospora crassa (strain ATCC 24698 / 74-OR23-1A / CBS 708.71 / DSM 1257 / FGSC 987)	60	integral component of membrane [GO:0016021]; protein secretion [GO:0009306]			PF11654;			UPI000018B159
NCU01838	V5IPE4	NIT_NEUCR	Arylacetonitrilase (EC 3.5.5.1) (EC 3.5.5.5)	B23G1.100 NCU01838	Neurospora crassa (strain ATCC 24698 / 74-OR23-1A / CBS 708.71 / DSM 1257 / FGSC 987)	327	arylacetonitrilase activity [GO:0047428]; indole-3-acetonitrile nitrile hydratase activity [GO:0080109]; nitrilase activity [GO:0000257]; cyanide catabolic process [GO:0019500]; cyanide metabolic process [GO:0019499]		PS50263;	PF00795;			UPI000000D299
NCU01841	Q1K570	Q1K570_NEUCR	Uncharacterized protein	NCU01841	Neurospora crassa (strain ATCC 24698 / 74-OR23-1A / CBS 708.71 / DSM 1257 / FGSC 987)	130	DASH complex [GO:0042729]; mitotic spindle midzone [GO:1990023]; mitotic spindle pole body [GO:0044732]; microtubule plus-end binding [GO:0051010]; mitotic cell cycle [GO:0000278]; positive regulation of attachment of spindle microtubules to kinetochore [GO:0051987]; positive regulation of microtubule polymerization [GO:0031116]			PF08654;		PTHR28036;	UPI000000D296
NCU01843	F5HG81	F5HG81_NEUCR	T-complex protein 1 subunit gamma	NCU01843	Neurospora crassa (strain ATCC 24698 / 74-OR23-1A / CBS 708.71 / DSM 1257 / FGSC 987)	540	chaperonin-containing T-complex [GO:0005832]; ATP binding [GO:0005524]; unfolded protein binding [GO:0051082]; protein folding [GO:0006457]		PS00750;PS00751;PS00995;	PF00118;			UPI000000D294
NCU01845	V5IN65	V5IN65_NEUCR	Phosphoglycerate mutase family domain-containing protein, variant	NCU01845	Neurospora crassa (strain ATCC 24698 / 74-OR23-1A / CBS 708.71 / DSM 1257 / FGSC 987)	570				PF00300;	SM00855;		UPI000000D292
NCU01850	Q7SD18	Q7SD18_NEUCR	Peroxisomal membrane protein PEX16	pex16 NCU01850	Neurospora crassa (strain ATCC 24698 / 74-OR23-1A / CBS 708.71 / DSM 1257 / FGSC 987)	393	peroxisomal membrane [GO:0005778]; peroxisome organization [GO:0007031]			PF08610;		PTHR13299;	UPI0000189BBB
NCU01854	V5IP73	V5IP73_NEUCR	Uncharacterized protein	NCU01854	Neurospora crassa (strain ATCC 24698 / 74-OR23-1A / CBS 708.71 / DSM 1257 / FGSC 987)	214	ESCRT III complex [GO:0000815]; multivesicular body [GO:0005771]; endosome transport via multivesicular body sorting pathway [GO:0032509]; late endosome to vacuole transport [GO:0045324]; protein transport [GO:0015031]						UPI0000189BBF
NCU01855	Q7SD13	Q7SD13_NEUCR	Uncharacterized protein	NCU01855	Neurospora crassa (strain ATCC 24698 / 74-OR23-1A / CBS 708.71 / DSM 1257 / FGSC 987)	162				PF04248;			UPI0000189BC0
NCU01857	Q7SHE9	Q7SHE9_NEUCR	DEAD/DEAH box RNA helicase	NCU01857	Neurospora crassa (strain ATCC 24698 / 74-OR23-1A / CBS 708.71 / DSM 1257 / FGSC 987)	1294	Ski complex [GO:0055087]; ATP binding [GO:0005524]; ATP-dependent RNA helicase activity [GO:0004004]; RNA binding [GO:0003723]; nuclear-transcribed mRNA catabolic process, 3'-5' exonucleolytic nonsense-mediated decay [GO:0070478]; RNA catabolic process [GO:0006401]		PS51192;PS51194;	PF00270;PF08148;PF00271;PF13234;	SM00487;SM01142;SM00490;		UPI00001895A5
NCU01859	Q02854	NUXM_NEUCR	NADH-ubiquinone oxidoreductase 20.9 kDa subunit (EC 1.6.99.3) (EC 7.1.1.2) (Complex I-20.9kD) (CI-20.9kD)	nuo20.9 NCU01859	Neurospora crassa (strain ATCC 24698 / 74-OR23-1A / CBS 708.71 / DSM 1257 / FGSC 987)	189	integral component of membrane [GO:0016021]; mitochondrial respiratory chain complex I [GO:0005747]; NADH dehydrogenase activity [GO:0003954]			PF10785;PF12853;			UPI0000130A96
NCU01861	Q7SHE5	Q7SHE5_NEUCR	Short chain dehydrogenase/reductase family protein	NCU01861	Neurospora crassa (strain ATCC 24698 / 74-OR23-1A / CBS 708.71 / DSM 1257 / FGSC 987)	359	oxidoreductase activity [GO:0016491]		PS00061;	PF00106;			UPI0003CB2D51
NCU01878	Q7SHC8	Q7SHC8_NEUCR	Vesicle-mediated transporter	NCU01878	Neurospora crassa (strain ATCC 24698 / 74-OR23-1A / CBS 708.71 / DSM 1257 / FGSC 987)	1136			PS50913;	PF01465;	SM00755;		UPI0003CB9326
NCU01883	Q7SHC3	Q7SHC3_NEUCR	SH3 domain signaling protein	NCU01883	Neurospora crassa (strain ATCC 24698 / 74-OR23-1A / CBS 708.71 / DSM 1257 / FGSC 987)	525	actin cortical patch [GO:0030479]; mating projection [GO:0005937]; mating projection tip [GO:0043332]; medial cortex [GO:0031097]; Rvs161p-Rvs167p complex [GO:1990528]; cytoskeletal protein binding [GO:0008092]; actin cortical patch localization [GO:0051666]; endocytosis [GO:0006897]; plasma membrane tubulation [GO:0097320]		PS51021;PS50002;	PF03114;PF00018;	SM00326;		UPI00001895BF
NCU01889	Q7SHB7	Q7SHB7_NEUCR	Uncharacterized protein	NCU01889	Neurospora crassa (strain ATCC 24698 / 74-OR23-1A / CBS 708.71 / DSM 1257 / FGSC 987)	357	cytoplasm [GO:0005737]; protein tyrosine phosphatase activity [GO:0004725]		PS00383;PS50056;	PF13350;			UPI00001895C5
NCU01894	Q7SHB2	Q7SHB2_NEUCR	Uncharacterized protein	NCU01894	Neurospora crassa (strain ATCC 24698 / 74-OR23-1A / CBS 708.71 / DSM 1257 / FGSC 987)	348	mitochondrial small ribosomal subunit [GO:0005763]; structural constituent of ribosome [GO:0003735]; mitochondrial translation [GO:0032543]			PF12298;		PTHR28158;	UPI00001895CA
NCU01902	Q7SHA4	Q7SHA4_NEUCR	Glucosamine 6-phosphate N-acetyltransferase	NCU01902	Neurospora crassa (strain ATCC 24698 / 74-OR23-1A / CBS 708.71 / DSM 1257 / FGSC 987)	177	endoplasmic reticulum [GO:0005783]; endoplasmic reticulum-Golgi intermediate compartment [GO:0005793]; Golgi apparatus [GO:0005794]; glucosamine 6-phosphate N-acetyltransferase activity [GO:0004343]; monosaccharide binding [GO:0048029]; N-acetylglucosamine biosynthetic process [GO:0006045]; UDP-N-acetylglucosamine biosynthetic process [GO:0006048]		PS51186;	PF00583;		PTHR13355;	UPI00001895D2
NCU01904	Q7SHA2	Q7SHA2_NEUCR	2-deoxy-D-gluconate 3-dehydrogenase	NCU01904	Neurospora crassa (strain ATCC 24698 / 74-OR23-1A / CBS 708.71 / DSM 1257 / FGSC 987)	280	oxidoreductase activity, acting on the CH-OH group of donors, NAD or NADP as acceptor [GO:0016616]		PS00061;				UPI0003CA4428
NCU01907	Q7SH99	Q7SH99_NEUCR	Syntaxin 5	NCU01907	Neurospora crassa (strain ATCC 24698 / 74-OR23-1A / CBS 708.71 / DSM 1257 / FGSC 987)	317	endomembrane system [GO:0012505]; Golgi membrane [GO:0000139]; integral component of membrane [GO:0016021]; SNARE complex [GO:0031201]; SNAP receptor activity [GO:0005484]; SNARE binding [GO:0000149]; endoplasmic reticulum to Golgi vesicle-mediated transport [GO:0006888]; intracellular protein transport [GO:0006886]; vesicle docking [GO:0048278]; vesicle fusion [GO:0006906]		PS50192;	PF05739;PF11416;	SM00397;		UPI00001895D7
NCU01912	V5IP53	V5IP53_NEUCR	Mannosyltransferase 1, variant	NCU01912	Neurospora crassa (strain ATCC 24698 / 74-OR23-1A / CBS 708.71 / DSM 1257 / FGSC 987)	1131	integral component of membrane [GO:0016021]; mannosyltransferase activity [GO:0000030]; protein O-linked glycosylation [GO:0006493]		PS50919;	PF02815;PF02366;PF16192;	SM00472;	PTHR10050;	UPI0003C9FC03
NCU01912	V5IRE4	V5IRE4_NEUCR	Mannosyltransferase 1	NCU01912	Neurospora crassa (strain ATCC 24698 / 74-OR23-1A / CBS 708.71 / DSM 1257 / FGSC 987)	1167	dolichyl-phosphate-mannose-protein mannosyltransferase Pmt1p-Pmt2p dimer complex [GO:0097582]; integral component of membrane [GO:0016021]; mannosyltransferase activity [GO:0000030]; fungal-type cell wall organization [GO:0031505]; protein O-linked glycosylation [GO:0006493]		PS50919;	PF02815;PF02366;PF16192;	SM00472;	PTHR10050;	UPI00001895DC
NCU01913	Q7SH93	Q7SH93_NEUCR	Pre-mRNA splicing factor	NCU01913	Neurospora crassa (strain ATCC 24698 / 74-OR23-1A / CBS 708.71 / DSM 1257 / FGSC 987)	535	catalytic step 2 spliceosome [GO:0071013]; U2 snRNP [GO:0005686]; U2-type prespliceosome [GO:0071004]; RNA binding [GO:0003723]; RNA processing [GO:0006396]		PS50128;	PF12230;PF01805;	SM00648;		UPI00001895DD
NCU01914	Q7SH92	SNX3_NEUCR	Sorting nexin-3	snx-3 NCU01914	Neurospora crassa (strain ATCC 24698 / 74-OR23-1A / CBS 708.71 / DSM 1257 / FGSC 987)	142	Golgi membrane [GO:0000139]; late endosome membrane [GO:0031902]; phosphatidylinositol binding [GO:0035091]; protein transport [GO:0015031]		PS50195;	PF00787;	SM00312;	PTHR10555;	UPI00001895DE
NCU01916	Q7SH90	Q7SH90_NEUCR	Mitochondrial carrier protein RIM2	NCU01916	Neurospora crassa (strain ATCC 24698 / 74-OR23-1A / CBS 708.71 / DSM 1257 / FGSC 987)	384	integral component of membrane [GO:0016021]; pyrimidine nucleotide transmembrane transporter activity [GO:0015218]; pyrimidine nucleotide import into mitochondrion [GO:1990519]		PS50920;	PF00153;		PTHR24089;	UPI00001895E0
NCU01918	Q7SH88	Q7SH88_NEUCR	Actin-related protein 2/3 complex subunit 4	NCU01918	Neurospora crassa (strain ATCC 24698 / 74-OR23-1A / CBS 708.71 / DSM 1257 / FGSC 987)	169	actin cortical patch [GO:0030479]; Arp2/3 protein complex [GO:0005885]; actin binding [GO:0003779]; structural molecule activity [GO:0005198]; actin cortical patch assembly [GO:0000147]; actin filament polymerization [GO:0030041]; Arp2/3 complex-mediated actin nucleation [GO:0034314]			PF05856;		PTHR22629;	UPI00001895E2
NCU01919	Q7SH87	Q7SH87_NEUCR	Ubiquitin C-terminal hydrolase	NCU01919	Neurospora crassa (strain ATCC 24698 / 74-OR23-1A / CBS 708.71 / DSM 1257 / FGSC 987)	548	thiol-dependent ubiquitinyl hydrolase activity [GO:0036459]; protein deubiquitination [GO:0016579]; ubiquitin-dependent protein catabolic process [GO:0006511]		PS50053;PS00972;PS00973;PS50235;	PF00240;PF00443;	SM00213;		UPI00001895E3
NCU01920	Q7SH86	Q7SH86_NEUCR	Uncharacterized protein	NCU01920	Neurospora crassa (strain ATCC 24698 / 74-OR23-1A / CBS 708.71 / DSM 1257 / FGSC 987)	219							UPI0003CA2C56
NCU01922	Q7SH84	Q7SH84_NEUCR	Uncharacterized protein	NCU01922	Neurospora crassa (strain ATCC 24698 / 74-OR23-1A / CBS 708.71 / DSM 1257 / FGSC 987)	238							UPI0003CB7144
NCU01927	V5IQ63	V5IQ63_NEUCR	Uncharacterized protein	NCU01927	Neurospora crassa (strain ATCC 24698 / 74-OR23-1A / CBS 708.71 / DSM 1257 / FGSC 987)	515	cell [GO:0005623]; intracellular protein transport [GO:0006886]		PS50909;PS50179;	PF03127;			UPI0003CA253A
NCU01927	V5IQM5	V5IQM5_NEUCR	Uncharacterized protein	NCU01927	Neurospora crassa (strain ATCC 24698 / 74-OR23-1A / CBS 708.71 / DSM 1257 / FGSC 987)	555	cell [GO:0005623]; intracellular protein transport [GO:0006886]		PS50909;PS50179;	PF03127;			UPI0003CA8361
NCU01929	Q7SDP4	PAN3_NEUCR	PAN2-PAN3 deadenylation complex subunit pan3 (PAB1P-dependent poly(A)-specific ribonuclease) (Poly(A)-nuclease deadenylation complex subunit 3) (PAN deadenylation complex subunit 3)	par-2 pan3 NCU01929	Neurospora crassa (strain ATCC 24698 / 74-OR23-1A / CBS 708.71 / DSM 1257 / FGSC 987)	656	P-body [GO:0000932]; PAN complex [GO:0031251]; ATP binding [GO:0005524]; metal ion binding [GO:0046872]; RNA binding [GO:0003723]; deadenylation-dependent decapping of nuclear-transcribed mRNA [GO:0000290]; mRNA processing [GO:0006397]; nuclear-transcribed mRNA poly(A) tail shortening [GO:0000289]; positive regulation of cytoplasmic mRNA processing body assembly [GO:0010606]; RNA phosphodiester b…		PS50103;			PTHR12272;	UPI000158888B
NCU01930	Q7SDP3	Q7SDP3_NEUCR	U6 snRNP-associated protein Lsm7	NCU01930	Neurospora crassa (strain ATCC 24698 / 74-OR23-1A / CBS 708.71 / DSM 1257 / FGSC 987)	143	catalytic step 2 spliceosome [GO:0071013]; Lsm1-7-Pat1 complex [GO:1990726]; U12-type spliceosomal complex [GO:0005689]; U2-type prespliceosome [GO:0071004]; U6 snRNP [GO:0005688]; mRNA splicing, via spliceosome [GO:0000398]; nuclear-transcribed mRNA catabolic process [GO:0000956]			PF01423;	SM00651;		UPI0003CAA067
NCU01932	Q7SDP1	Q7SDP1_NEUCR	SET-3	set-3 NCU01932	Neurospora crassa (strain ATCC 24698 / 74-OR23-1A / CBS 708.71 / DSM 1257 / FGSC 987)	1238	chromatin [GO:0000785]; nucleus [GO:0005634]; histone methyltransferase activity (H3-K36 specific) [GO:0046975]; regulation of transcription, DNA-templated [GO:0006355]		PS51215;PS50868;PS50280;	PF00856;	SM00508;SM00317;		UPI0003CA952D
NCU01938	V5IQ57	V5IQ57_NEUCR	Uncharacterized protein	NCU01938	Neurospora crassa (strain ATCC 24698 / 74-OR23-1A / CBS 708.71 / DSM 1257 / FGSC 987)	399							UPI0003CA9083
NCU01938	V5IRE0	V5IRE0_NEUCR	Uncharacterized protein	NCU01938	Neurospora crassa (strain ATCC 24698 / 74-OR23-1A / CBS 708.71 / DSM 1257 / FGSC 987)	421							UPI0003CBB1A9
NCU01939	Q7SDN4	Q7SDN4_NEUCR	Nonsense-mediated mRNA decay protein	NCU01939	Neurospora crassa (strain ATCC 24698 / 74-OR23-1A / CBS 708.71 / DSM 1257 / FGSC 987)	1047	cytosol [GO:0005829]; nuclear envelope [GO:0005635]; protein transporter activity [GO:0008565]; Ran GTPase binding [GO:0008536]; protein import into nucleus [GO:0006606]		PS50166;	PF08506;PF03810;PF08389;	SM00913;		UPI0000189AE0
NCU01945	Q7SDZ1	ISN1_NEUCR	IMP-specific 5'-nucleotidase 1 (EC 3.1.3.99)	isn-1 NCU01945 NCU10480	Neurospora crassa (strain ATCC 24698 / 74-OR23-1A / CBS 708.71 / DSM 1257 / FGSC 987)	431	IMP 5'-nucleotidase activity [GO:0050483]; magnesium ion binding [GO:0000287]; inosine salvage [GO:0006190]; nicotinamide riboside biosynthetic process [GO:0071590]; nicotinic acid riboside biosynthetic process [GO:0071592]; nucleotide metabolic process [GO:0009117]			PF06437;		PTHR28213;	UPI0003CB58DA
NCU01948	Q7SDY8	Q7SDY8_NEUCR	Ribosomal protein Srp1	NCU01948	Neurospora crassa (strain ATCC 24698 / 74-OR23-1A / CBS 708.71 / DSM 1257 / FGSC 987)	160	cytosolic large ribosomal subunit [GO:0022625]; structural constituent of ribosome [GO:0003735]; translation [GO:0006412]		PS01171;	PF01157;		PTHR20981;	UPI0000189A75
NCU01949	Q7SDY7	Q7SDY7_NEUCR	40S ribosomal protein S9	un-16 NCU01949	Neurospora crassa (strain ATCC 24698 / 74-OR23-1A / CBS 708.71 / DSM 1257 / FGSC 987)	190	cytosolic small ribosomal subunit [GO:0022627]; rRNA binding [GO:0019843]; structural constituent of ribosome [GO:0003735]; positive regulation of translational fidelity [GO:0045903]; translation [GO:0006412]		PS00632;PS50889;	PF00163;PF01479;	SM01390;SM00363;	PTHR11831;	UPI0000189A76
NCU01953	Q7SDY4	Q7SDY4_NEUCR	AMI1 protein	eat-3 NCU01953	Neurospora crassa (strain ATCC 24698 / 74-OR23-1A / CBS 708.71 / DSM 1257 / FGSC 987)	1988	cell cortex [GO:0005938]; phospholipid binding [GO:0005543]; tubulin binding [GO:0015631]; cortical protein anchoring [GO:0032065]; dynein-driven meiotic oscillatory nuclear movement [GO:0030989]; microtubule cytoskeleton organization [GO:0000226]; mitochondrial fission [GO:0000266]; mitochondrion inheritance [GO:0000001]		PS50003;	PF12814;	SM00233;		UPI0003CB97EC
NCU01955	Q7SDY2	ATG3_NEUCR	Autophagy-related protein 3 (Autophagy-related E2-like conjugation enzyme atg3)	apg-3 atg3 NCU01955	Neurospora crassa (strain ATCC 24698 / 74-OR23-1A / CBS 708.71 / DSM 1257 / FGSC 987)	346	cytoplasmic ubiquitin ligase complex [GO:0000153]; cytosol [GO:0005829]; Atg8 ligase activity [GO:0019776]; autophagosome assembly [GO:0000045]; autophagy of mitochondrion [GO:0000422]; protein transport [GO:0015031]			PF03987;PF10381;PF03986;			UPI0003CBAF99
NCU01956	Q7SDY1	Q7SDY1_NEUCR	Cytoskeleton assembly control protein Sla2	eat-2 NCU01956	Neurospora crassa (strain ATCC 24698 / 74-OR23-1A / CBS 708.71 / DSM 1257 / FGSC 987)	1053	actin cortical patch [GO:0030479]; intracellular membrane-bounded organelle [GO:0043231]; medial cortex [GO:0031097]; new growing cell tip [GO:0035841]; old growing cell tip [GO:0035840]; actin filament binding [GO:0051015]; clathrin adaptor activity [GO:0035615]; clathrin binding [GO:0030276]; clathrin light chain binding [GO:0032051]; phosphatidylinositol binding [GO:0035091]; phosphatidylinosi…		PS50942;PS50945;	PF07651;PF01608;	SM00273;SM00307;	PTHR10407;	UPI0000189A7C
NCU01957	Q7SDY0	Q7SDY0_NEUCR	AR2	NCU01957	Neurospora crassa (strain ATCC 24698 / 74-OR23-1A / CBS 708.71 / DSM 1257 / FGSC 987)	322	cell [GO:0005623]; integral component of membrane [GO:0016021]; proton-exporting ATPase activity, phosphorylative mechanism [GO:0008553]; proton transmembrane transport [GO:1902600]; regulation of intracellular pH [GO:0051453]						UPI0003CB11A2
NCU01962	V5IP40	V5IP40_NEUCR	Encodes anonymous transcript-5 protein, variant	eat-5 NCU01962	Neurospora crassa (strain ATCC 24698 / 74-OR23-1A / CBS 708.71 / DSM 1257 / FGSC 987)	87	mitochondrial respiratory chain complex IV [GO:0005751]; cytochrome-c oxidase activity [GO:0004129]			PF02046;		PTHR11504;	UPI0003C9FD11
NCU01962	V5IRD7	V5IRD7_NEUCR	Encodes anonymous transcript-5 protein	eat-5 NCU01962	Neurospora crassa (strain ATCC 24698 / 74-OR23-1A / CBS 708.71 / DSM 1257 / FGSC 987)	136	mitochondrial respiratory chain complex IV [GO:0005751]; cytochrome-c oxidase activity [GO:0004129]; enzyme regulator activity [GO:0030234]; aerobic respiration [GO:0009060]; mitochondrial electron transport, cytochrome c to oxygen [GO:0006123]			PF02046;		PTHR11504;	UPI0000189A08
NCU01965	P28350	SYV_NEUCR	Valine--tRNA ligase, mitochondrial (EC 6.1.1.9) (Valyl-tRNA synthetase) (ValRS)	cyt-20 un-3 NCU01965	Neurospora crassa (strain ATCC 24698 / 74-OR23-1A / CBS 708.71 / DSM 1257 / FGSC 987)	1093	cytosol [GO:0005829]; mitochondrion [GO:0005739]; aminoacyl-tRNA editing activity [GO:0002161]; ATP binding [GO:0005524]; valine-tRNA ligase activity [GO:0004832]; valyl-tRNA aminoacylation [GO:0006438]		PS00178;	PF08264;PF00133;			UPI0000136703
NCU01966	V5IQ48	V5IQ48_NEUCR	Ribosomal protein L37	NCU01966	Neurospora crassa (strain ATCC 24698 / 74-OR23-1A / CBS 708.71 / DSM 1257 / FGSC 987)	92	cytosolic large ribosomal subunit [GO:0022625]; metal ion binding [GO:0046872]; rRNA binding [GO:0019843]; structural constituent of ribosome [GO:0003735]; translation [GO:0006412]		PS01077;	PF01907;			UPI0000189A0B
NCU01970	Q7SE90	Q7SE90_NEUCR	DUF718 domain-containing protein	NCU01970	Neurospora crassa (strain ATCC 24698 / 74-OR23-1A / CBS 708.71 / DSM 1257 / FGSC 987)	169	cytoplasm [GO:0005737]; racemase and epimerase activity, acting on carbohydrates and derivatives [GO:0016857]			PF05336;			UPI0000189A0F
NCU01981	Q7SE79	Q7SE79_NEUCR	Translation factor sui1	NCU01981	Neurospora crassa (strain ATCC 24698 / 74-OR23-1A / CBS 708.71 / DSM 1257 / FGSC 987)	117	eukaryotic 43S preinitiation complex [GO:0016282]; multi-eIF complex [GO:0043614]; ribosomal small subunit binding [GO:0043024]; RNA binding [GO:0003723]; translation initiation factor activity [GO:0003743]; translation initiation factor binding [GO:0031369]; formation of translation preinitiation complex [GO:0001731]; maintenance of translational fidelity [GO:1990145]		PS50296;	PF01253;			UPI00002246F3
NCU01983	V5INW8	V5INW8_NEUCR	Uncharacterized protein	NCU01983	Neurospora crassa (strain ATCC 24698 / 74-OR23-1A / CBS 708.71 / DSM 1257 / FGSC 987)	308	mitochondrial inner membrane [GO:0005743]; mitochondrion [GO:0005739]; protein insertion into mitochondrial inner membrane from matrix side [GO:0032979]			PF07961;			UPI0003CAD201
NCU01985	Q7SE75	MET3_NEUCR	Sulfate adenylyltransferase (EC 2.7.7.4) (ATP-sulfurylase) (Sulfate adenylate transferase) (SAT)	cys-11 met3 B13D15.110 NCU01985	Neurospora crassa (strain ATCC 24698 / 74-OR23-1A / CBS 708.71 / DSM 1257 / FGSC 987)	573	cytoplasm [GO:0005737]; adenylylsulfate kinase activity [GO:0004020]; ATP binding [GO:0005524]; sulfate adenylyltransferase (ATP) activity [GO:0004781]; cysteine biosynthetic process [GO:0019344]; hydrogen sulfide biosynthetic process [GO:0070814]; methionine biosynthetic process [GO:0009086]; sulfate assimilation [GO:0000103]; sulfate assimilation via adenylyl sulfate reduction [GO:0010134]; sul…			PF01747;PF14306;			UPI0000189A1D
NCU01991	Q7SFP0	Q7SFP0_NEUCR	Uncharacterized protein	NCU01991	Neurospora crassa (strain ATCC 24698 / 74-OR23-1A / CBS 708.71 / DSM 1257 / FGSC 987)	844							UPI000018980E
NCU01992	Q7SFN9	Q7SFN9_NEUCR	Coatomer subunit gamma	NCU01992	Neurospora crassa (strain ATCC 24698 / 74-OR23-1A / CBS 708.71 / DSM 1257 / FGSC 987)	916	COPI vesicle coat [GO:0030126]; endoplasmic reticulum [GO:0005783]; endoplasmic reticulum-Golgi intermediate compartment [GO:0005793]; Golgi apparatus [GO:0005794]; Golgi membrane [GO:0000139]; membrane [GO:0016020]; structural molecule activity [GO:0005198]; endoplasmic reticulum to Golgi vesicle-mediated transport [GO:0006888]; intra-Golgi vesicle-mediated transport [GO:0006891]; intracellular …			PF01602;PF16381;PF08752;		PTHR10261;	UPI000018980F
NCU01997	Q7SFN4	Q7SFN4_NEUCR	ABC transporter	NCU01997	Neurospora crassa (strain ATCC 24698 / 74-OR23-1A / CBS 708.71 / DSM 1257 / FGSC 987)	718	integral component of membrane [GO:0016021]			PF03109;			UPI0003CA122E
NCU02002	Q7SFM9	Q7SFM9_NEUCR	Uncharacterized protein	NCU02002	Neurospora crassa (strain ATCC 24698 / 74-OR23-1A / CBS 708.71 / DSM 1257 / FGSC 987)	1041	mitochondrial inner membrane [GO:0005743]			PF14611;			UPI0000189819
NCU02003	Q01372	EF1A_NEUCR	Elongation factor 1-alpha (EF-1-alpha)	tef-1 B15B3.060 NCU02003	Neurospora crassa (strain ATCC 24698 / 74-OR23-1A / CBS 708.71 / DSM 1257 / FGSC 987)	460	cytoplasm [GO:0005737]; GTP binding [GO:0005525]; GTPase activity [GO:0003924]; translation elongation factor activity [GO:0003746]; translation [GO:0006412]; translational elongation [GO:0006414]		PS00301;PS51722;	PF00009;PF03144;PF03143;			UPI00002246C2
NCU02004	Q7SFM8	Q7SFM8_NEUCR	Phosphoserine phosphatase	NCU02004	Neurospora crassa (strain ATCC 24698 / 74-OR23-1A / CBS 708.71 / DSM 1257 / FGSC 987)	496	cytoplasm [GO:0005737]; magnesium ion binding [GO:0000287]; phosphatase activity [GO:0016791]; phosphoserine phosphatase activity [GO:0004647]; dephosphorylation [GO:0016311]; L-serine biosynthetic process [GO:0006564]						UPI000018981B
NCU02005	Q7SFM7	Q7SFM7_NEUCR	Phosphoadenosine phosphosulfate reductase	NCU02005	Neurospora crassa (strain ATCC 24698 / 74-OR23-1A / CBS 708.71 / DSM 1257 / FGSC 987)	398	phosphoadenylyl-sulfate reductase (thioredoxin) activity [GO:0004604]; sulfate assimilation, phosphoadenylyl sulfate reduction by phosphoadenylyl-sulfate reductase (thioredoxin) [GO:0019379]			PF01507;			UPI0003CB96FC
NCU02006	Q7SFM6	Q7SFM6_NEUCR	Uncharacterized protein	NCU02006	Neurospora crassa (strain ATCC 24698 / 74-OR23-1A / CBS 708.71 / DSM 1257 / FGSC 987)	773							UPI000018981D
NCU02007	Q7SFM5	Q7SFM5_NEUCR	Iron-sulfur cluster biosynthesis protein Isd11	NCU02007	Neurospora crassa (strain ATCC 24698 / 74-OR23-1A / CBS 708.71 / DSM 1257 / FGSC 987)	110				PF05347;			UPI00015C379F
NCU02009	Q7SFM3	Q7SFM3_NEUCR	FreB protein	NCU02009	Neurospora crassa (strain ATCC 24698 / 74-OR23-1A / CBS 708.71 / DSM 1257 / FGSC 987)	647	integral component of membrane [GO:0016021]; plasma membrane [GO:0005886]; ferric-chelate reductase activity [GO:0000293]; cellular iron ion homeostasis [GO:0006879]; copper ion import [GO:0015677]; iron ion transport [GO:0006826]		PS51384;	PF08022;PF01794;PF08030;			UPI0003CAB808
NCU02010	Q7SFM2	Q7SFM2_NEUCR	2-isopropylmalate synthase	leu-4 NCU02010	Neurospora crassa (strain ATCC 24698 / 74-OR23-1A / CBS 708.71 / DSM 1257 / FGSC 987)	625	mitochondrion [GO:0005739]; 2-isopropylmalate synthase activity [GO:0003852]; leucine biosynthetic process [GO:0009098]		PS00815;PS00816;PS50991;	PF00682;PF08502;	SM00917;		UPI0000189821
NCU02011	Q7SFM1	Q7SFM1_NEUCR	Importin subunit beta-1	NCU02011	Neurospora crassa (strain ATCC 24698 / 74-OR23-1A / CBS 708.71 / DSM 1257 / FGSC 987)	876	cytoplasm [GO:0005737]; NLS-dependent protein nuclear import complex [GO:0042564]; nuclear membrane [GO:0031965]; nuclear periphery [GO:0034399]; nuclear pore [GO:0005643]; disordered domain specific binding [GO:0097718]; importin-alpha family protein binding [GO:0061676]; nuclear localization sequence binding [GO:0008139]; protein transporter activity [GO:0008565]; protein-containing complex bin…		PS50166;	PF03810;	SM00185;SM00913;	PTHR10527;	UPI0000189822
NCU02013	Q7SFL9	Q7SFL9_NEUCR	Uncharacterized protein	NCU02013	Neurospora crassa (strain ATCC 24698 / 74-OR23-1A / CBS 708.71 / DSM 1257 / FGSC 987)	163				PF07956;			UPI0000189824
NCU02016	Q7SFL6	Q7SFL6_NEUCR	Uncharacterized protein	NCU02016	Neurospora crassa (strain ATCC 24698 / 74-OR23-1A / CBS 708.71 / DSM 1257 / FGSC 987)	128	integral component of membrane [GO:0016021]					PTHR40466;	UPI0000189827
NCU02017	Q7SFL5	Q7SFL5_NEUCR	CBF/NF-Y family transcription factor	ada-2 NCU02017	Neurospora crassa (strain ATCC 24698 / 74-OR23-1A / CBS 708.71 / DSM 1257 / FGSC 987)	138	Ada2/Gcn5/Ada3 transcription activator complex [GO:0005671]; negative cofactor 2 complex [GO:0017054]; chromatin binding [GO:0003682]; core promoter binding [GO:0001047]; protein heterodimerization activity [GO:0046982]; TBP-class protein binding [GO:0017025]; transcription coactivator activity [GO:0003713]; transcription corepressor activity [GO:0003714]; chromatin remodeling [GO:0006338]; negat…			PF00808;			UPI00015C34DE
NCU02018	Q7SFL4	Q7SFL4_NEUCR	Short chain dehydrogenase	NCU02018	Neurospora crassa (strain ATCC 24698 / 74-OR23-1A / CBS 708.71 / DSM 1257 / FGSC 987)	297	oxidoreductase activity, acting on NAD(P)H, oxygen as acceptor [GO:0050664]		PS00061;	PF00106;			UPI0003CAA880
NCU02025	Q1K924	Q1K924_NEUCR	Uncharacterized protein	NCU02025	Neurospora crassa (strain ATCC 24698 / 74-OR23-1A / CBS 708.71 / DSM 1257 / FGSC 987)	438							UPI000006C619
NCU02027	Q9HFJ5	APTH1_NEUCR	Acyl-protein thioesterase 1 (EC 3.1.2.-)	B2J23.070 NCU02027	Neurospora crassa (strain ATCC 24698 / 74-OR23-1A / CBS 708.71 / DSM 1257 / FGSC 987)	245	cytoplasm [GO:0005737]; carboxylic ester hydrolase activity [GO:0052689]; palmitoyl-(protein) hydrolase activity [GO:0008474]; fatty acid metabolic process [GO:0006631]; protein depalmitoylation [GO:0002084]			PF02230;			UPI000006AA8C
NCU02041	Q7SF37	Q7SF37_NEUCR	Anchored cell wall protein 11	acw-11 NCU02041	Neurospora crassa (strain ATCC 24698 / 74-OR23-1A / CBS 708.71 / DSM 1257 / FGSC 987)	195							UPI00001898DE
NCU02044	Q7SF34	Q7SF34_NEUCR	Obg-like ATPase 1	NCU02044	Neurospora crassa (strain ATCC 24698 / 74-OR23-1A / CBS 708.71 / DSM 1257 / FGSC 987)	395	cytoplasm [GO:0005737]; ATP binding [GO:0005524]; ATPase activity [GO:0016887]; GTP binding [GO:0005525]; ribosomal large subunit binding [GO:0043023]; ribosome binding [GO:0043022]		PS51710;	PF01926;PF06071;			UPI00002246C8
NCU02055	Q7SDE3	Q7SDE3_NEUCR	Uridine nucleosidase Urh1	NCU02055	Neurospora crassa (strain ATCC 24698 / 74-OR23-1A / CBS 708.71 / DSM 1257 / FGSC 987)	397	nicotinamide riboside hydrolase activity [GO:0070635]; nicotinic acid riboside hydrolase activity [GO:0070636]; uridine nucleosidase activity [GO:0045437]; cytidine catabolic process [GO:0006216]; NAD biosynthesis via nicotinamide riboside salvage pathway [GO:0034356]; nicotinate nucleotide salvage [GO:0019358]; pyrimidine-containing compound salvage [GO:0008655]; uridine catabolic process [GO:00…			PF01156;		PTHR12304;	UPI0000189B3C
NCU02056	Q7SDE2	Q7SDE2_NEUCR	Salicylaldehyde dehydrogenase	NCU02056	Neurospora crassa (strain ATCC 24698 / 74-OR23-1A / CBS 708.71 / DSM 1257 / FGSC 987)	476	succinate-semialdehyde dehydrogenase (NAD+) activity [GO:0004777]; succinate-semialdehyde dehydrogenase [NAD(P)+] activity [GO:0009013]			PF00171;			UPI0000189B3D
NCU02063	Q7SDD5	PMIP_NEUCR	Mitochondrial intermediate peptidase (MIP) (EC 3.4.24.59) (Octapeptidyl aminopeptidase)	oct-1 NCU02063	Neurospora crassa (strain ATCC 24698 / 74-OR23-1A / CBS 708.71 / DSM 1257 / FGSC 987)	805	mitochondrial matrix [GO:0005759]; mitochondrion [GO:0005739]; metal ion binding [GO:0046872]; metalloendopeptidase activity [GO:0004222]; peptide metabolic process [GO:0006518]; protein processing involved in protein targeting to mitochondrion [GO:0006627]; proteolysis [GO:0006508]		PS00142;	PF01432;		PTHR11804:SF5;	UPI0000189B44
NCU02064	Q7SEZ9	Q7SEZ9_NEUCR	MICOS complex subunit	NCU02064	Neurospora crassa (strain ATCC 24698 / 74-OR23-1A / CBS 708.71 / DSM 1257 / FGSC 987)	280	MICOS complex [GO:0061617]; mitochondrial crista junction [GO:0044284]; cristae formation [GO:0042407]			PF09769;		PTHR28268;	UPI0000189905
NCU02066	Q7SEZ7	Q7SEZ7_NEUCR	Ribosome assembly protein Noc2	NCU02066	Neurospora crassa (strain ATCC 24698 / 74-OR23-1A / CBS 708.71 / DSM 1257 / FGSC 987)	790	Noc1p-Noc2p complex [GO:0030690]; Noc2p-Noc3p complex [GO:0030691]; nucleolus [GO:0005730]; nucleoplasm [GO:0005654]; ribosomal large subunit biogenesis [GO:0042273]			PF03715;		PTHR12687;	UPI0000189907
NCU02074	Q7SEY9	ERO1_NEUCR	Endoplasmic reticulum oxidoreductin-1 (EC 1.8.4.-)	ero-1 NCU02074	Neurospora crassa (strain ATCC 24698 / 74-OR23-1A / CBS 708.71 / DSM 1257 / FGSC 987)	668	endoplasmic reticulum membrane [GO:0005789]; oxidoreductase activity, acting on a sulfur group of donors, disulfide as acceptor [GO:0016671]; protein disulfide isomerase activity [GO:0003756]; protein disulfide oxidoreductase activity [GO:0015035]; protein folding in endoplasmic reticulum [GO:0034975]			PF04137;		PTHR12613;	UPI000018990F
NCU02075	Q7RW06	Q7RW06_NEUCR	Heat shock protein 70	hsp70-2 NCU02075	Neurospora crassa (strain ATCC 24698 / 74-OR23-1A / CBS 708.71 / DSM 1257 / FGSC 987)	585	cytoplasm [GO:0005737]; cytosol [GO:0005829]; polysome [GO:0005844]; ATP binding [GO:0005524]; ATPase activity [GO:0016887]; ATPase activity, coupled [GO:0042623]; calmodulin binding [GO:0005516]; heat shock protein binding [GO:0031072]; misfolded protein binding [GO:0051787]; protein binding involved in protein folding [GO:0044183]; unfolded protein binding [GO:0051082]; 'de novo' cotranslationa…		PS00297;PS00329;PS01036;	PF00012;		PTHR19375;	UPI0003CAA1AA
NCU02076	Q7SEY8	Q7SEY8_NEUCR	Eukaryotic translation initiation factor 4E	NCU02076	Neurospora crassa (strain ATCC 24698 / 74-OR23-1A / CBS 708.71 / DSM 1257 / FGSC 987)	248	cytoplasmic stress granule [GO:0010494]; eukaryotic translation initiation factor 4F complex [GO:0016281]; nucleus [GO:0005634]; mRNA cap binding [GO:0098808]; phosphatidylinositol-3-phosphate binding [GO:0032266]; RNA 7-methylguanosine cap binding [GO:0000340]; translation initiation factor activity [GO:0003743]; nuclear-transcribed mRNA catabolic process, nonsense-mediated decay [GO:0000184]; r…		PS00813;	PF01652;		PTHR11960;	UPI0000189911
NCU02078	Q7SEY6	Q7SEY6_NEUCR	Uncharacterized protein	NCU02078	Neurospora crassa (strain ATCC 24698 / 74-OR23-1A / CBS 708.71 / DSM 1257 / FGSC 987)	713	RSC-type complex [GO:0016586]; chromatin binding [GO:0003682]; ATP-dependent chromatin remodeling [GO:0043044]; nucleosome disassembly [GO:0006337]; transcription elongation from RNA polymerase II promoter [GO:0006368]		PS50014;	PF00439;	SM00297;	PTHR16062;	UPI0000189913
NCU02079	Q7SEY5	Q7SEY5_NEUCR	Cyclin-dependent kinases regulatory subunit	NCU02079	Neurospora crassa (strain ATCC 24698 / 74-OR23-1A / CBS 708.71 / DSM 1257 / FGSC 987)	118	cyclin-dependent protein kinase holoenzyme complex [GO:0000307]; SCF ubiquitin ligase complex [GO:0019005]; cyclin-dependent protein serine/threonine kinase activator activity [GO:0061575]; histone binding [GO:0042393]; kinase activity [GO:0016301]; protein kinase binding [GO:0019901]; protein-containing complex binding [GO:0044877]; ubiquitin binding [GO:0043130]; zinc ion binding [GO:0008270]; …		PS00945;	PF01111;	SM01084;		UPI0003CB39F1
NCU02082	Q7SEY2	CFT1_NEUCR	Protein cft1 (Cleavage factor two protein 1) (Polyadenylation factor 3)	paa-3 cft1 NCU02082	Neurospora crassa (strain ATCC 24698 / 74-OR23-1A / CBS 708.71 / DSM 1257 / FGSC 987)	1487	mRNA cleavage and polyadenylation specificity factor complex [GO:0005847]; nucleus [GO:0005634]; RNA binding [GO:0003723]; mRNA polyadenylation [GO:0006378]			PF03178;			UPI0000189917
NCU02090	Q7SCM0	Q7SCM0_NEUCR	Adenine phosphoribosyltransferase	NCU02090	Neurospora crassa (strain ATCC 24698 / 74-OR23-1A / CBS 708.71 / DSM 1257 / FGSC 987)	226	cytoplasm [GO:0005737]; adenine binding [GO:0002055]; adenine phosphoribosyltransferase activity [GO:0003999]; AMP binding [GO:0016208]; adenine salvage [GO:0006168]; AMP salvage [GO:0044209]; nucleoside metabolic process [GO:0009116]			PF00156;			UPI0000189C50
NCU02095	Q7SDB5	Q7SDB5_NEUCR	Uncharacterized protein	NCU02095	Neurospora crassa (strain ATCC 24698 / 74-OR23-1A / CBS 708.71 / DSM 1257 / FGSC 987)	313							UPI0003CA2C72
NCU02096	Q7SDB4	Q7SDB4_NEUCR	Flavohemoglobin	NCU02096	Neurospora crassa (strain ATCC 24698 / 74-OR23-1A / CBS 708.71 / DSM 1257 / FGSC 987)	480	FAD binding [GO:0071949]; heme binding [GO:0020037]; nitric oxide dioxygenase activity [GO:0008941]; oxygen binding [GO:0019825]; cellular response to nitrosative stress [GO:0071500]; nitric oxide catabolic process [GO:0046210]		PS51384;PS01033;	PF00970;PF00042;PF00175;		PTHR43396;	UPI0003CA2F90
NCU02097	Q7SDB3	Q7SDB3_NEUCR	Short chain dehydrogenase	NCU02097	Neurospora crassa (strain ATCC 24698 / 74-OR23-1A / CBS 708.71 / DSM 1257 / FGSC 987)	340	oxidoreductase activity, acting on NAD(P)H, oxygen as acceptor [GO:0050664]		PS00061;				UPI0000189B5A
NCU02098	Q7SDB2	Q7SDB2_NEUCR	G/U mismatch-specific DNA glycosylase	NCU02098	Neurospora crassa (strain ATCC 24698 / 74-OR23-1A / CBS 708.71 / DSM 1257 / FGSC 987)	396	pyrimidine-specific mismatch base pair DNA N-glycosylase activity [GO:0008263]; uracil DNA N-glycosylase activity [GO:0004844]; base-excision repair, AP site formation [GO:0006285]			PF03167;	SM00986;	PTHR12159;	UPI0000189B5B
NCU02103	Q7SDN0	Q7SDN0_NEUCR	DNA-directed RNA polymerase subunit (EC 2.7.7.6)	NCU02103	Neurospora crassa (strain ATCC 24698 / 74-OR23-1A / CBS 708.71 / DSM 1257 / FGSC 987)	1761	RNA polymerase II, core complex [GO:0005665]; DNA binding [GO:0003677]; DNA-directed 5'-3' RNA polymerase activity [GO:0003899]; transcription by RNA polymerase II [GO:0006366]		PS00115;	PF04997;PF00623;PF04983;PF05000;PF04998;PF04992;PF04990;	SM00663;		UPI0003CA1750
NCU02108	Q7SDM5	Q7SDM5_NEUCR	BolA domain-containing protein	NCU02108	Neurospora crassa (strain ATCC 24698 / 74-OR23-1A / CBS 708.71 / DSM 1257 / FGSC 987)	162				PF01722;		PTHR12735;	UPI0003CA3144
NCU02109	Q7SDM4	Q7SDM4_NEUCR	UDP-N-acetylglucosamine pyrophosphorylase	NCU02109	Neurospora crassa (strain ATCC 24698 / 74-OR23-1A / CBS 708.71 / DSM 1257 / FGSC 987)	487	UDP-N-acetylglucosamine diphosphorylase activity [GO:0003977]; UDP-N-acetylglucosamine biosynthetic process [GO:0006048]			PF01704;		PTHR11952;	UPI0000189AEA
NCU02110	Q7RW00	Q7RW00_NEUCR	NADPH oxidase 1	nox-1 NCU02110	Neurospora crassa (strain ATCC 24698 / 74-OR23-1A / CBS 708.71 / DSM 1257 / FGSC 987)	553	integral component of membrane [GO:0016021]; oxidoreductase activity [GO:0016491]		PS51384;	PF08022;PF01794;PF08030;			UPI0000189AEB
NCU02111	Q7SDM3	MYO1_NEUCR	Myosin-1 (Class I unconventional myosin) (Type I myosin)	myo-1 NCU02111	Neurospora crassa (strain ATCC 24698 / 74-OR23-1A / CBS 708.71 / DSM 1257 / FGSC 987)	1235	actin cortical patch [GO:0030479]; myosin complex [GO:0016459]; actin binding [GO:0003779]; ATP binding [GO:0005524]; motor activity [GO:0003774]		PS51456;PS50002;PS51757;	PF00063;PF06017;PF00018;	SM00242;SM00326;		UPI0000189AEC
NCU02113	Q7SDM1	Q7SDM1_NEUCR	Ubiquitin-conjugating enzyme E2 13	NCU02113	Neurospora crassa (strain ATCC 24698 / 74-OR23-1A / CBS 708.71 / DSM 1257 / FGSC 987)	151	nucleus [GO:0005634]; ATP binding [GO:0005524]; ubiquitin conjugating enzyme activity [GO:0061631]; postreplication repair [GO:0006301]; protein K63-linked ubiquitination [GO:0070534]		PS00183;PS50127;	PF00179;			UPI0000189AEE
NCU02115	Q7SCY9	Q7SCY9_NEUCR	Uncharacterized protein	NCU02115	Neurospora crassa (strain ATCC 24698 / 74-OR23-1A / CBS 708.71 / DSM 1257 / FGSC 987)	953	calcium ion binding [GO:0005509]; zinc ion binding [GO:0008270]		PS00018;PS50222;PS01357;PS50135;	PF00569;	SM00054;SM00291;		UPI0000189BD9
NCU02117	Q7SCY7	SYM1_NEUCR	Protein sym-1	sym-1 NCU02117	Neurospora crassa (strain ATCC 24698 / 74-OR23-1A / CBS 708.71 / DSM 1257 / FGSC 987)	172	cytoplasm [GO:0005737]; integral component of membrane [GO:0016021]; mitochondrial inner membrane [GO:0005743]			PF04117;		PTHR11266;	UPI00015C36B6
NCU02124	V5IQ14	V5IQ14_NEUCR	Dienelactone hydrolase, variant	NCU02124	Neurospora crassa (strain ATCC 24698 / 74-OR23-1A / CBS 708.71 / DSM 1257 / FGSC 987)	255	hydrolase activity [GO:0016787]			PF01738;			UPI0000189A35
NCU02124	V5IQI7	V5IQI7_NEUCR	Dienelactone hydrolase	NCU02124	Neurospora crassa (strain ATCC 24698 / 74-OR23-1A / CBS 708.71 / DSM 1257 / FGSC 987)	332	hydrolase activity [GO:0016787]			PF01738;			UPI0003CA6726
NCU02133	P07509	SODC_NEUCR	Superoxide dismutase [Cu-Zn] (EC 1.15.1.1)	sod-1 NCU02133	Neurospora crassa (strain ATCC 24698 / 74-OR23-1A / CBS 708.71 / DSM 1257 / FGSC 987)	154	cytoplasm [GO:0005737]; extracellular space [GO:0005615]; copper ion binding [GO:0005507]; superoxide dismutase activity [GO:0004784]; superoxide dismutase copper chaperone activity [GO:0016532]; zinc ion binding [GO:0008270]; cell redox homeostasis [GO:0045454]; cellular zinc ion homeostasis [GO:0006882]; removal of superoxide radicals [GO:0019430]		PS00087;PS00332;	PF00080;		PTHR10003;	UPI0000168943
NCU02134	Q7SE42	Q7SE42_NEUCR	Transcription factor	NCU02134	Neurospora crassa (strain ATCC 24698 / 74-OR23-1A / CBS 708.71 / DSM 1257 / FGSC 987)	880	cytoplasm [GO:0005737]; nucleus [GO:0005634]; RISC complex [GO:0016442]; nuclease activity [GO:0004518]; RNA binding [GO:0003723]; gene silencing by RNA [GO:0031047]; RNA catabolic process [GO:0006401]		PS50830;PS50304;	PF00565;PF00567;	SM00318;SM00333;		UPI0000189A3F
NCU02136	Q7SE40	Q7SE40_NEUCR	Transaldolase (EC 2.2.1.2)	NCU02136	Neurospora crassa (strain ATCC 24698 / 74-OR23-1A / CBS 708.71 / DSM 1257 / FGSC 987)	324	cytoplasm [GO:0005737]; sedoheptulose-7-phosphate:D-glyceraldehyde-3-phosphate glyceronetransferase activity [GO:0004801]; carbohydrate metabolic process [GO:0005975]; pentose-phosphate shunt, non-oxidative branch [GO:0009052]		PS01054;PS00958;	PF00923;		PTHR10683;PTHR10683:SF20;	UPI0000189A41
NCU02139	Q7SE37	Q7SE37_NEUCR	Annexin ANXC4	NCU02139	Neurospora crassa (strain ATCC 24698 / 74-OR23-1A / CBS 708.71 / DSM 1257 / FGSC 987)	770	calcium ion binding [GO:0005509]; calcium-dependent phospholipid binding [GO:0005544]			PF00191;			UPI0000189A44
NCU02148	Q7SER8	Q7SER8_NEUCR	Triacylglycerol lipase	NCU02148	Neurospora crassa (strain ATCC 24698 / 74-OR23-1A / CBS 708.71 / DSM 1257 / FGSC 987)	627	integral component of membrane [GO:0016021]; lipase activity [GO:0016298]; sterol esterase activity [GO:0004771]; cellular lipid metabolic process [GO:0044255]; sterol metabolic process [GO:0016125]			PF04083;			UPI0000189957
NCU02149	Q7SER7	Q7SER7_NEUCR	Cytochrome c oxidase assembly protein	cyt-1 NCU02149	Neurospora crassa (strain ATCC 24698 / 74-OR23-1A / CBS 708.71 / DSM 1257 / FGSC 987)	132	integral component of mitochondrial inner membrane [GO:0031305]; mitochondrial intermembrane space [GO:0005758]; mitochondrial respiratory chain complex IV assembly [GO:0033617]			PF10203;		PTHR28627;	UPI0000189958
NCU02152	V5IQ03	V5IQ03_NEUCR	RRM domain-containing protein, variant	NCU02152	Neurospora crassa (strain ATCC 24698 / 74-OR23-1A / CBS 708.71 / DSM 1257 / FGSC 987)	379	nucleic acid binding [GO:0003676]				SM00360;	PTHR23204;PTHR23204:SF4;	UPI000018995B
NCU02156	Q7SER0	Q7SER0_NEUCR	DsDNA-binding protein PDCD5	NCU02156	Neurospora crassa (strain ATCC 24698 / 74-OR23-1A / CBS 708.71 / DSM 1257 / FGSC 987)	141	cytosol [GO:0005829]; nucleus [GO:0005634]; DNA binding [GO:0003677]			PF01984;		PTHR10840;	UPI000018995F
NCU02160	B2ZAG4	B2ZAG4_NEUCS	Small GTPase RAC	rac GE21DRAFT_261 NCU02160	Neurospora crassa	200	GTP binding [GO:0005525]; GTPase activity [GO:0003924]; small GTPase mediated signal transduction [GO:0007264]		PS51420;	PF00071;			UPI0001741CE6
NCU02160	Q7RW05	Q7RW05_NEUCR	Small GTPase RAC	rac-1 NCU02160	Neurospora crassa (strain ATCC 24698 / 74-OR23-1A / CBS 708.71 / DSM 1257 / FGSC 987)	200	cell cortex [GO:0005938]; cell projection [GO:0042995]; cytoplasm [GO:0005737]; plasma membrane [GO:0005886]; GTP binding [GO:0005525]; GTPase activity [GO:0003924]; protein kinase binding [GO:0019901]; actin cytoskeleton organization [GO:0030036]; actin filament organization [GO:0007015]; establishment or maintenance of cell polarity [GO:0007163]; regulation of actin cytoskeleton organization [G…		PS51420;	PF00071;			UPI0001741CE6
NCU02162	Q7SEQ5	Q7SEQ5_NEUCR	SURF1-like protein	NCU02162	Neurospora crassa (strain ATCC 24698 / 74-OR23-1A / CBS 708.71 / DSM 1257 / FGSC 987)	340	integral component of membrane [GO:0016021]; mitochondrial inner membrane [GO:0005743]		PS50895;	PF02104;			UPI0003CA964E
NCU02169	Q7SEP8	Q7SEP8_NEUCR	Uncharacterized protein	NCU02169	Neurospora crassa (strain ATCC 24698 / 74-OR23-1A / CBS 708.71 / DSM 1257 / FGSC 987)	248				PF14617;		PTHR24030;	UPI000018996C
NCU02181	Q7SE03	Q7SE03_NEUCR	40S ribosomal protein S4	NCU02181	Neurospora crassa (strain ATCC 24698 / 74-OR23-1A / CBS 708.71 / DSM 1257 / FGSC 987)	261	cytosolic small ribosomal subunit [GO:0022627]; rRNA binding [GO:0019843]; structural constituent of ribosome [GO:0003735]; translation [GO:0006412]		PS00528;PS50889;	PF16121;PF00467;PF00900;PF08071;PF01479;	SM00363;	PTHR11581;	UPI00015C376F
NCU02184	V5IPZ1	V5IPZ1_NEUCR	Chitinase-1	chit-1 NCU02184	Neurospora crassa (strain ATCC 24698 / 74-OR23-1A / CBS 708.71 / DSM 1257 / FGSC 987)	1434	extracellular region [GO:0005576]; chitinase activity [GO:0004568]; carbohydrate metabolic process [GO:0005975]			PF00704;			UPI0000189A69
NCU02184	V5IRC0	V5IRC0_NEUCR	Chitinase-1, variant	chit-1 NCU02184	Neurospora crassa (strain ATCC 24698 / 74-OR23-1A / CBS 708.71 / DSM 1257 / FGSC 987)	1366	carbohydrate metabolic process [GO:0005975]			PF00704;			UPI0003CB6C08
NCU02191	Q7S4C9	Q7S4C9_NEUCR	Uncharacterized protein	NCU02191	Neurospora crassa (strain ATCC 24698 / 74-OR23-1A / CBS 708.71 / DSM 1257 / FGSC 987)	502	glycoprotein-N-acetylgalactosamine 3-beta-galactosyltransferase activity [GO:0016263]; O-glycan processing, core 1 [GO:0016267]						UPI0003CBDBAF
NCU02193	P33287	PDC_NEUCR	Pyruvate decarboxylase (EC 4.1.1.1) (8-10 nm cytoplasmic filament-associated protein) (P59NC)	cfp pdc-1 NCU02193	Neurospora crassa (strain ATCC 24698 / 74-OR23-1A / CBS 708.71 / DSM 1257 / FGSC 987)	570	cytosol [GO:0005829]; carboxy-lyase activity [GO:0016831]; identical protein binding [GO:0042802]; magnesium ion binding [GO:0000287]; pyruvate decarboxylase activity [GO:0004737]; thiamine pyrophosphate binding [GO:0030976]; pyruvate metabolic process [GO:0006090]		PS00187;	PF02775;PF00205;PF02776;			UPI000012900E
NCU02193	V5IMQ6	V5IMQ6_NEUCR	Pyruvate decarboxylase, variant	cfp NCU02193	Neurospora crassa (strain ATCC 24698 / 74-OR23-1A / CBS 708.71 / DSM 1257 / FGSC 987)	548	carboxy-lyase activity [GO:0016831]; magnesium ion binding [GO:0000287]; thiamine pyrophosphate binding [GO:0030976]		PS00187;	PF02775;PF00205;PF02776;			UPI00015C37C1
NCU02203	Q7S469	Q7S469_NEUCR	C2H2 finger domain-containing protein	NCU02203	Neurospora crassa (strain ATCC 24698 / 74-OR23-1A / CBS 708.71 / DSM 1257 / FGSC 987)	838	nucleic acid binding [GO:0003676]		PS50089;PS00028;		SM00355;		UPI000018A847
NCU02207	Q7S465	Q7S465_NEUCR	T-complex protein 1 subunit beta	NCU02207	Neurospora crassa (strain ATCC 24698 / 74-OR23-1A / CBS 708.71 / DSM 1257 / FGSC 987)	530	chaperonin-containing T-complex [GO:0005832]; ATP binding [GO:0005524]; unfolded protein binding [GO:0051082]; protein folding [GO:0006457]		PS00750;PS00751;PS00995;	PF00118;		PTHR11353:SF23;	UPI0003CAEA37
NCU02208	Q7S464	EIF3B_NEUCR	Eukaryotic translation initiation factor 3 subunit B (eIF3b) (Eukaryotic translation initiation factor 3 90 kDa subunit homolog) (eIF3 p90) (Translation initiation factor eIF3 p90 subunit homolog)	prt-1 NCU02208	Neurospora crassa (strain ATCC 24698 / 74-OR23-1A / CBS 708.71 / DSM 1257 / FGSC 987)	747	eukaryotic 43S preinitiation complex [GO:0016282]; eukaryotic 48S preinitiation complex [GO:0033290]; eukaryotic translation initiation factor 3 complex [GO:0005852]; translation initiation factor activity [GO:0003743]; translation initiation factor binding [GO:0031369]; formation of cytoplasmic translation initiation complex [GO:0001732]; translational initiation [GO:0006413]		PS50102;	PF08662;		PTHR14068;	UPI000018A84C
NCU02209	Q7S463	Q7S463_NEUCR	Delta-12 fatty acid desaturase	ods NCU02209	Neurospora crassa (strain ATCC 24698 / 74-OR23-1A / CBS 708.71 / DSM 1257 / FGSC 987)	481	integral component of membrane [GO:0016021]; lipid metabolic process [GO:0006629]			PF00487;			UPI000018A84D
NCU02218	Q7S4H5	Q7S4H5_NEUCR	Uncharacterized protein	NCU02218	Neurospora crassa (strain ATCC 24698 / 74-OR23-1A / CBS 708.71 / DSM 1257 / FGSC 987)	1026				PF09797;		PTHR22767:SF3;	UPI000018A7D9
NCU02223	Q7S4H0	Q7S4H0_NEUCR	Uncharacterized protein	NCU02223	Neurospora crassa (strain ATCC 24698 / 74-OR23-1A / CBS 708.71 / DSM 1257 / FGSC 987)	836	SAGA complex [GO:0000124]; SLIK (SAGA-like) complex [GO:0046695]; transcription factor TFIID complex [GO:0005669]; DNA binding [GO:0003677]; protein heterodimerization activity [GO:0046982]; RNA polymerase II activating transcription factor binding [GO:0001102]; TBP-class protein binding [GO:0017025]; histone H3 acetylation [GO:0043966]; RNA polymerase II preinitiation complex assembly [GO:005112…			PF03847;		PTHR12264;	UPI000018A7DE
NCU02224	Q7S4G9	Q7S4G9_NEUCR	26S proteasome non-ATPase regulatory subunit 3	rpn-3 NCU02224	Neurospora crassa (strain ATCC 24698 / 74-OR23-1A / CBS 708.71 / DSM 1257 / FGSC 987)	552	proteasome regulatory particle, lid subcomplex [GO:0008541]; enzyme regulator activity [GO:0030234]; regulation of protein catabolic process [GO:0042176]; ubiquitin-dependent protein catabolic process [GO:0006511]		PS50250;	PF01399;PF08375;	SM00088;	PTHR10758:SF2;	UPI000018A7DF
NCU02226	Q7S4G7	MTNA_NEUCR	Methylthioribose-1-phosphate isomerase (M1Pi) (MTR-1-P isomerase) (EC 5.3.1.23) (S-methyl-5-thioribose-1-phosphate isomerase) (Translation initiation factor eIF-2B subunit alpha/beta/delta-like protein)	mri-1 NCU02226	Neurospora crassa (strain ATCC 24698 / 74-OR23-1A / CBS 708.71 / DSM 1257 / FGSC 987)	388	cytoplasm [GO:0005737]; nucleus [GO:0005634]; S-methyl-5-thioribose-1-phosphate isomerase activity [GO:0046523]; L-methionine salvage from methylthioadenosine [GO:0019509]; L-methionine salvage from S-adenosylmethionine [GO:0019284]			PF01008;			UPI000018A7E1
NCU02227	Q7S4G6	Q7S4G6_NEUCR	Acetylornithine deacetylase	NCU02227	Neurospora crassa (strain ATCC 24698 / 74-OR23-1A / CBS 708.71 / DSM 1257 / FGSC 987)	452	metallopeptidase activity [GO:0008237]		PS00758;PS00759;	PF07687;PF01546;			UPI000018A7E2
NCU02229	Q7S4G4	Q7S4G4_NEUCR	Uncharacterized protein	NCU02229	Neurospora crassa (strain ATCC 24698 / 74-OR23-1A / CBS 708.71 / DSM 1257 / FGSC 987)	201	integral component of membrane [GO:0016021]			PF10311;		PTHR28029;	UPI000018A7E4
NCU02230	O13396	MSH2_NEUCR	DNA mismatch repair protein msh-2	msh-2 msh2 NCU02230	Neurospora crassa (strain ATCC 24698 / 74-OR23-1A / CBS 708.71 / DSM 1257 / FGSC 987)	937	mismatch repair complex [GO:0032300]; MutSalpha complex [GO:0032301]; MutSbeta complex [GO:0032302]; nucleus [GO:0005634]; ATP binding [GO:0005524]; damaged DNA binding [GO:0003684]; DNA-dependent ATPase activity [GO:0008094]; mismatched DNA binding [GO:0030983]; maintenance of DNA repeat elements [GO:0043570]; mismatch repair [GO:0006298]; negative regulation of DNA recombination [GO:0045910]; p…		PS00486;	PF01624;PF05188;PF05192;PF05190;PF00488;	SM00534;SM00533;	PTHR11361:SF35;	UPI000012F5EF
NCU02236	Q7S443	Q7S443_NEUCR	Uncharacterized protein	NCU02236	Neurospora crassa (strain ATCC 24698 / 74-OR23-1A / CBS 708.71 / DSM 1257 / FGSC 987)	577	transcription by RNA polymerase I [GO:0006360]			PF08208;			UPI000018A862
NCU02241	Q7S438	SLD2_NEUCR	DNA replication regulator sld2 (DNA replication complex protein 4)	drc-4 sld2 NCU02241	Neurospora crassa (strain ATCC 24698 / 74-OR23-1A / CBS 708.71 / DSM 1257 / FGSC 987)	610	cytoplasm [GO:0005737]; DNA replication preinitiation complex [GO:0031261]; DNA replication origin binding [GO:0003688]; single-stranded DNA binding [GO:0003697]; DNA replication initiation [GO:0006270]; DNA strand renaturation [GO:0000733]; double-strand break repair via break-induced replication [GO:0000727]; mitotic DNA replication preinitiation complex assembly [GO:1902977]			PF11719;		PTHR28124;	UPI0003CB088B
NCU02250	P00842	ATP9_NEUCR	ATP synthase subunit 9, mitochondrial (Lipid-binding protein)	oli atp-9 atp9 prl-1 B13D24.340 NCU02250	Neurospora crassa (strain ATCC 24698 / 74-OR23-1A / CBS 708.71 / DSM 1257 / FGSC 987)	147	integral component of membrane [GO:0016021]; mitochondrial proton-transporting ATP synthase complex, coupling factor F(o) [GO:0000276]; proton-transporting ATP synthase complex, coupling factor F(o) [GO:0045263]; lipid binding [GO:0008289]; proton-transporting ATP synthase activity, rotational mechanism [GO:0046933]; ATP hydrolysis coupled proton transport [GO:0015991]; ATP synthesis coupled prot…		PS00605;	PF00137;		PTHR10031;	UPI00001263CC
NCU02252	Q7S5B2	Q7S5B2_NEUCR	Phosphoglycerate mutase	emp-6 NCU02252	Neurospora crassa (strain ATCC 24698 / 74-OR23-1A / CBS 708.71 / DSM 1257 / FGSC 987)	519	cytoplasm [GO:0005737]; 2,3-bisphosphoglycerate-independent phosphoglycerate mutase activity [GO:0046537]; manganese ion binding [GO:0030145]; cellular carbohydrate metabolic process [GO:0044262]; glucose catabolic process [GO:0006007]			PF06415;PF01676;		PTHR31637;	UPI000018A6B1
NCU02256	Q7S5A8	Q7S5A8_NEUCR	Exosome complex exonuclease Rrp6	NCU02256	Neurospora crassa (strain ATCC 24698 / 74-OR23-1A / CBS 708.71 / DSM 1257 / FGSC 987)	822	nuclear exosome (RNase complex) [GO:0000176]; 3'-5' exonuclease activity [GO:0008408]; nucleic acid binding [GO:0003676]; nucleotide binding [GO:0000166]; RNA processing [GO:0006396]		PS50967;	PF01612;PF00570;PF08066;	SM00474;SM00341;		UPI000018A6B5
NCU02260	Q7RVB2	Q7RVB2_NEUCR	26S protease regulatory subunit 6B	rpt-3 NCU02260	Neurospora crassa (strain ATCC 24698 / 74-OR23-1A / CBS 708.71 / DSM 1257 / FGSC 987)	421	cytosolic proteasome complex [GO:0031597]; proteasome regulatory particle, base subcomplex [GO:0008540]; ATP binding [GO:0005524]; identical protein binding [GO:0042802]; peptidase activity [GO:0008233]; proteasome-activating ATPase activity [GO:0036402]; positive regulation of RNA polymerase II transcriptional preinitiation complex assembly [GO:0045899]; proteasome regulatory particle assembly […		PS00674;	PF00004;PF16450;	SM00382;	PTHR23073:SF8;	UPI000018A6B9
NCU02263	Q7S5A2	Q7S5A2_NEUCR	Sec14 cytosolic factor	NCU02263	Neurospora crassa (strain ATCC 24698 / 74-OR23-1A / CBS 708.71 / DSM 1257 / FGSC 987)	334	cell division site [GO:0032153]; cell pole [GO:0060187]; growing cell tip [GO:0035838]; nucleus [GO:0005634]; prospore membrane [GO:0005628]; phosphatidylcholine transporter activity [GO:0008525]; phosphatidylinositol transporter activity [GO:0008526]; ascospore-type prospore-specific spindle pole body remodeling [GO:0031322]; Golgi vesicle transport [GO:0048193]		PS50191;	PF00650;PF03765;	SM01100;SM00516;		UPI000018A6BC
NCU02264	V5IKN3	V5IKN3_NEUCR	Prefoldin subunit 3, variant	NCU02264	Neurospora crassa (strain ATCC 24698 / 74-OR23-1A / CBS 708.71 / DSM 1257 / FGSC 987)	185	prefoldin complex [GO:0016272]; protein folding [GO:0006457]					PTHR12409;	UPI0003CA14CD
NCU02264	V5IMP3	V5IMP3_NEUCR	Prefoldin subunit 3	NCU02264	Neurospora crassa (strain ATCC 24698 / 74-OR23-1A / CBS 708.71 / DSM 1257 / FGSC 987)	255	cytoplasm [GO:0005737]; polysome [GO:0005844]; prefoldin complex [GO:0016272]; tubulin binding [GO:0015631]; microtubule-based process [GO:0007017]; protein folding [GO:0006457]; tubulin complex assembly [GO:0007021]			PF02996;		PTHR12409;	UPI0003CA192F
NCU02267	V5IMN7	V5IMN7_NEUCR	Mitochondrial protein Fmp25, variant	NCU02267	Neurospora crassa (strain ATCC 24698 / 74-OR23-1A / CBS 708.71 / DSM 1257 / FGSC 987)	606	integral component of mitochondrial inner membrane [GO:0031305]; mitochondrial respiratory chain complex III assembly [GO:0034551]		PS00626;PS50012;	PF00415;			UPI000018A6C0
NCU02269	Q7S597	Q7S597_NEUCR	Mitochondrial carnitine/acylcarnitine carrier protein	NCU02269	Neurospora crassa (strain ATCC 24698 / 74-OR23-1A / CBS 708.71 / DSM 1257 / FGSC 987)	312	integral component of membrane [GO:0016021]; transmembrane transporter activity [GO:0022857]		PS50920;	PF00153;		PTHR24089;	UPI000018A6C2
NCU02272	Q7S594	Q7S594_NEUCR	Uncharacterized protein	NCU02272	Neurospora crassa (strain ATCC 24698 / 74-OR23-1A / CBS 708.71 / DSM 1257 / FGSC 987)	1040							UPI000018A6C5
NCU02273	Q01294	CARP_NEUCR	Vacuolar protease A (EC 3.4.23.-)	pep-4 B13D24.090 NCU02273	Neurospora crassa (strain ATCC 24698 / 74-OR23-1A / CBS 708.71 / DSM 1257 / FGSC 987)	396	fungal-type vacuole [GO:0000324]; aspartic-type endopeptidase activity [GO:0004190]; protein catabolic process [GO:0030163]; proteolysis [GO:0006508]		PS00141;PS51767;	PF00026;		PTHR13683;	UPI000018A6C6
NCU02274	P34898	GLYC_NEUCR	Serine hydroxymethyltransferase, cytosolic (SHMT) (EC 2.1.2.1) (Glycine hydroxymethyltransferase) (Serine methylase)	for B13D24.080 NCU02274	Neurospora crassa (strain ATCC 24698 / 74-OR23-1A / CBS 708.71 / DSM 1257 / FGSC 987)	480	cytoplasm [GO:0005737]; amino acid binding [GO:0016597]; cobalt ion binding [GO:0050897]; glycine hydroxymethyltransferase activity [GO:0004372]; pyridoxal phosphate binding [GO:0030170]; serine binding [GO:0070905]; zinc ion binding [GO:0008270]; cellular response to tetrahydrofolate [GO:1904482]; folic acid metabolic process [GO:0046655]; glycine biosynthetic process from serine [GO:0019264]; g…		PS00096;	PF00464;		PTHR11680;	UPI000018A6C7
NCU02280	P25710	NUJM_NEUCR	NADH-ubiquinone oxidoreductase 21.3 kDa subunit (EC 1.6.99.3) (EC 7.1.1.2)	B13D24.010 NCU02280	Neurospora crassa (strain ATCC 24698 / 74-OR23-1A / CBS 708.71 / DSM 1257 / FGSC 987)	200	integral component of mitochondrial inner membrane [GO:0031305]; TIM23 mitochondrial import inner membrane translocase complex [GO:0005744]; NADH dehydrogenase activity [GO:0003954]; protein import into mitochondrial matrix [GO:0030150]						UPI0000130952
NCU02284	V5ILM7	V5ILM7_NEUCR	RNA cytidine acetyltransferase (EC 2.3.1.-) (18S rRNA cytosine acetyltransferase)	NAT10 NCU02284	Neurospora crassa (strain ATCC 24698 / 74-OR23-1A / CBS 708.71 / DSM 1257 / FGSC 987)	1062	nucleolus [GO:0005730]; preribosome, small subunit precursor [GO:0030688]; ATP binding [GO:0005524]; rRNA cytidine N-acetyltransferase activity [GO:1990883]; rRNA acetylation involved in maturation of SSU-rRNA [GO:1904812]; tRNA acetylation [GO:0051391]			PF08351;PF13718;PF05127;PF13725;		PTHR10925;	UPI000018A6D0
NCU02287	Q7S582	Q7S582_NEUCR	Acyl-CoA dehydrogenase	acd-1 NCU02287	Neurospora crassa (strain ATCC 24698 / 74-OR23-1A / CBS 708.71 / DSM 1257 / FGSC 987)	546	flavin adenine dinucleotide binding [GO:0050660]; oxidoreductase activity, acting on the CH-CH group of donors [GO:0016627]		PS50255;	PF00441;PF02770;PF02771;PF00173;	SM01117;		UPI000018A6D3
NCU02289	Q7RVS7	Q7RVS7_NEUCR	Ubiquitin-conjugating enzyme E2	NCU02289	Neurospora crassa (strain ATCC 24698 / 74-OR23-1A / CBS 708.71 / DSM 1257 / FGSC 987)	147	ubiquitin ligase complex [GO:0000151]; ATP binding [GO:0005524]; ubiquitin conjugating enzyme activity [GO:0061631]; ubiquitin protein ligase binding [GO:0031625]; ubiquitin-dependent protein catabolic process [GO:0006511]		PS00183;PS50127;	PF00179;			UPI00015C39A4
NCU02293	Q7S577	Q7S577_NEUCR	Uncharacterized protein	NCU02293	Neurospora crassa (strain ATCC 24698 / 74-OR23-1A / CBS 708.71 / DSM 1257 / FGSC 987)	117	mitochondrial intermembrane space [GO:0005758]; mitochondrial respiratory chain complex IV assembly [GO:0033617]			PF02297;		PTHR11387;	UPI000018A6D9
NCU02299	Q7S571	Q7S571_NEUCR	NADP-dependent leukotriene B4 12-hydroxydehydrogenase	NCU02299	Neurospora crassa (strain ATCC 24698 / 74-OR23-1A / CBS 708.71 / DSM 1257 / FGSC 987)	358	oxidoreductase activity [GO:0016491]			PF00107;	SM00829;		UPI00015C39A7
NCU02305	Q7S565	COQ1_NEUCR	Probable hexaprenyl pyrophosphate synthase, mitochondrial (HPS) (EC 2.5.1.-)	NCU02305	Neurospora crassa (strain ATCC 24698 / 74-OR23-1A / CBS 708.71 / DSM 1257 / FGSC 987)	449	extrinsic component of mitochondrial inner membrane [GO:0031314]; metal ion binding [GO:0046872]; trans-hexaprenyltranstransferase activity [GO:0000010]; isoprenoid biosynthetic process [GO:0008299]; ubiquinone biosynthetic process [GO:0006744]		PS00723;PS00444;	PF00348;			UPI000018A6E5
NCU02315	V5IL29	V5IL29_NEUCR	Uncharacterized protein	NCU02315	Neurospora crassa (strain ATCC 24698 / 74-OR23-1A / CBS 708.71 / DSM 1257 / FGSC 987)	1191	nucleus [GO:0005634]; DNA binding [GO:0003677]		PS51294;PS50090;		SM00717;	PTHR10641;	UPI0003CADB2B
NCU02315	V5ILL9	V5ILL9_NEUCR	Uncharacterized protein	NCU02315	Neurospora crassa (strain ATCC 24698 / 74-OR23-1A / CBS 708.71 / DSM 1257 / FGSC 987)	1390	nucleus [GO:0005634]; DNA binding [GO:0003677]		PS51294;PS50090;		SM00717;	PTHR10641;	UPI000018A87A
NCU02319	Q7S416	Q7S416_NEUCR	Aminopeptidase	NCU02319	Neurospora crassa (strain ATCC 24698 / 74-OR23-1A / CBS 708.71 / DSM 1257 / FGSC 987)	1059	cytoplasm [GO:0005737]; metalloaminopeptidase activity [GO:0070006]; peptide binding [GO:0042277]; zinc ion binding [GO:0008270]; peptide catabolic process [GO:0043171]; proteolysis [GO:0006508]			PF11838;PF01433;		PTHR11533;	UPI000018A87E
NCU02325	Q7S4T9	Q7S4T9_NEUCR	GMP synthase	gua-3 NCU02325	Neurospora crassa (strain ATCC 24698 / 74-OR23-1A / CBS 708.71 / DSM 1257 / FGSC 987)	543	cytosol [GO:0005829]; ATP binding [GO:0005524]; GMP synthase (glutamine-hydrolyzing) activity [GO:0003922]; GMP synthase activity [GO:0003921]; pyrophosphatase activity [GO:0016462]; glutamine metabolic process [GO:0006541]; GMP biosynthetic process [GO:0006177]		PS51273;PS51553;	PF00117;PF00958;PF02540;			UPI00021DB020
NCU02328	Q7S4T6	Q7S4T6_NEUCR	O-methyltransferase	NCU02328	Neurospora crassa (strain ATCC 24698 / 74-OR23-1A / CBS 708.71 / DSM 1257 / FGSC 987)	414	O-methyltransferase activity [GO:0008171]		PS51683;	PF00891;			UPI0003C9FD95
NCU02333	P33280	ARGI_NEUCR	Arginase (EC 3.5.3.1)	aga-1 aga car1 NCU02333	Neurospora crassa (strain ATCC 24698 / 74-OR23-1A / CBS 708.71 / DSM 1257 / FGSC 987)	358	cytoplasm [GO:0005737]; cytosol [GO:0005829]; arginase activity [GO:0004053]; manganese ion binding [GO:0030145]; arginine catabolic process to ornithine [GO:0019547]; urea cycle [GO:0000050]		PS01053;PS51409;	PF00491;			UPI000018A76F
NCU02333	V5IL23	V5IL23_NEUCR	Arginase (EC 3.5.3.1)	aga-1 NCU02333	Neurospora crassa (strain ATCC 24698 / 74-OR23-1A / CBS 708.71 / DSM 1257 / FGSC 987)	335	arginase activity [GO:0004053]; metal ion binding [GO:0046872]; arginine metabolic process [GO:0006525]		PS01053;PS51409;	PF00491;			UPI0003CA7BA5
NCU02335	V5IKM1	V5IKM1_NEUCR	Short chain dehydrogenase, variant	NCU02335	Neurospora crassa (strain ATCC 24698 / 74-OR23-1A / CBS 708.71 / DSM 1257 / FGSC 987)	282							UPI000018A771
NCU02336	Q7S4S9	Q7S4S9_NEUCR	Capsule associated protein	NCU02336	Neurospora crassa (strain ATCC 24698 / 74-OR23-1A / CBS 708.71 / DSM 1257 / FGSC 987)	707	integral component of membrane [GO:0016021]; glucosyltransferase activity [GO:0046527]			PF05686;	SM00672;	PTHR12203;	UPI000018A772
NCU02338	Q7S4S7	Q7S4S7_NEUCR	Secreted protein	NCU02338	Neurospora crassa (strain ATCC 24698 / 74-OR23-1A / CBS 708.71 / DSM 1257 / FGSC 987)	313				PF05630;		PTHR33657;	UPI0003CB07F8
NCU02347	Q7S408	Q7S408_NEUCR	Sec7 domain-containing protein	NCU02347	Neurospora crassa (strain ATCC 24698 / 74-OR23-1A / CBS 708.71 / DSM 1257 / FGSC 987)	1607	ARF guanyl-nucleotide exchange factor activity [GO:0005086]; regulation of ARF protein signal transduction [GO:0032012]		PS50190;	PF01369;	SM00222;		UPI000018A886
NCU02349	Q7S407	Q7S407_NEUCR	UDP-glucose:glycoprotein glucosyltransferase	NCU02349	Neurospora crassa (strain ATCC 24698 / 74-OR23-1A / CBS 708.71 / DSM 1257 / FGSC 987)	1500	endoplasmic reticulum [GO:0005783]; UDP-glucose:glycoprotein glucosyltransferase activity [GO:0003980]; unfolded protein binding [GO:0051082]; ER-associated misfolded protein catabolic process [GO:0071712]; protein N-linked glycosylation via asparagine [GO:0018279]			PF06427;		PTHR11226;	UPI000018A888
NCU02351	V5IML5	V5IML5_NEUCR	Chitin synthase regulator 3, variant 2	NCU02351	Neurospora crassa (strain ATCC 24698 / 74-OR23-1A / CBS 708.71 / DSM 1257 / FGSC 987)	935				PF08238;	SM00671;		UPI0003CA6903
NCU02353	V5IML0	V5IML0_NEUCR	Uncharacterized protein	NCU02353	Neurospora crassa (strain ATCC 24698 / 74-OR23-1A / CBS 708.71 / DSM 1257 / FGSC 987)	316	cytosol [GO:0005829]; thiol-dependent ubiquitin-specific protease activity [GO:0004843]; ubiquitin-specific protease activity involved in negative regulation of retrograde protein transport, ER to cytosol [GO:1904265]; endoplasmic reticulum unfolded protein response [GO:0030968]; protein deubiquitination [GO:0016579]; ubiquitin-dependent ERAD pathway [GO:0030433]		PS50802;	PF02338;		PTHR13312;	UPI0003CB3F69
NCU02357	Q7S4W9	Q7S4W9_NEUCR	Importin subunit beta-3	NCU02357	Neurospora crassa (strain ATCC 24698 / 74-OR23-1A / CBS 708.71 / DSM 1257 / FGSC 987)	1096	cytoplasm [GO:0005737]; nuclear membrane [GO:0031965]; nuclear periphery [GO:0034399]; nuclear import signal receptor activity [GO:0061608]; nuclear localization sequence binding [GO:0008139]; protein transporter activity [GO:0008565]; Ran GTPase binding [GO:0008536]; mRNA export from nucleus [GO:0006406]; NLS-bearing protein import into nucleus [GO:0006607]; regulation of G2/M transition of mito…		PS50166;		SM01349;	PTHR10527;	UPI000018A748
NCU02358	Q7S4W8	Q7S4W8_NEUCR	SDS23	NCU02358	Neurospora crassa (strain ATCC 24698 / 74-OR23-1A / CBS 708.71 / DSM 1257 / FGSC 987)	542	cellular response to glucose starvation [GO:0042149]; regulation of mitotic metaphase/anaphase transition [GO:0030071]		PS51371;	PF00571;	SM00116;		UPI0003CA9EB7
NCU02360	Q7S4W6	Q7S4W6_NEUCR	Transmembrane protein UsgS	NCU02360	Neurospora crassa (strain ATCC 24698 / 74-OR23-1A / CBS 708.71 / DSM 1257 / FGSC 987)	386	integral component of membrane [GO:0016021]						UPI000018A74B
NCU02361	V5IL13	V5IL13_NEUCR	Formamidase, variant	NCU02361	Neurospora crassa (strain ATCC 24698 / 74-OR23-1A / CBS 708.71 / DSM 1257 / FGSC 987)	461	hydrolase activity, acting on carbon-nitrogen (but not peptide) bonds, in linear amides [GO:0016811]			PF03069;		PTHR31891;	UPI0003CB429D
NCU02361	V5IMK5	V5IMK5_NEUCR	Formamidase	NCU02361	Neurospora crassa (strain ATCC 24698 / 74-OR23-1A / CBS 708.71 / DSM 1257 / FGSC 987)	467	hydrolase activity, acting on carbon-nitrogen (but not peptide) bonds, in linear amides [GO:0016811]			PF03069;		PTHR31891;	UPI0003CAFAAE
NCU02363	Q7S4W3	Q7S4W3_NEUCR	RTA1 domain-containing protein	NCU02363	Neurospora crassa (strain ATCC 24698 / 74-OR23-1A / CBS 708.71 / DSM 1257 / FGSC 987)	353	fungal-type vacuole [GO:0000324]; integral component of membrane [GO:0016021]; plasma membrane [GO:0005886]			PF04479;		PTHR31465;	UPI00015C3ACF
NCU02366	Q7S4W0	Q7S4W0_NEUCR	Aconitate hydratase, mitochondrial (Aconitase) (EC 4.2.1.-)	tca-3 NCU02366	Neurospora crassa (strain ATCC 24698 / 74-OR23-1A / CBS 708.71 / DSM 1257 / FGSC 987)	784	cytosol [GO:0005829]; mitochondrial nucleoid [GO:0042645]; mitochondrion [GO:0005739]; 4 iron, 4 sulfur cluster binding [GO:0051539]; aconitate hydratase activity [GO:0003994]; double-stranded DNA binding [GO:0003690]; metal ion binding [GO:0046872]; single-stranded DNA binding [GO:0003697]; mitochondrial genome maintenance [GO:0000002]; tricarboxylic acid cycle [GO:0006099]		PS00450;PS01244;	PF00330;PF00694;			UPI000018A751
NCU02367	Q7S4V9	Q7S4V9_NEUCR	Uncharacterized protein	NCU02367	Neurospora crassa (strain ATCC 24698 / 74-OR23-1A / CBS 708.71 / DSM 1257 / FGSC 987)	732				PF10307;			UPI0003CAF888
NCU02370	Q7S4V6	Q7S4V6_NEUCR	Uncharacterized protein	NCU02370	Neurospora crassa (strain ATCC 24698 / 74-OR23-1A / CBS 708.71 / DSM 1257 / FGSC 987)	76	preribosome, large subunit precursor [GO:0030687]; ribosomal large subunit assembly [GO:0000027]			PF14615;			UPI00015C37C3
NCU02372	Q7S4V4	Q7S4V4_NEUCR	Protein-lysine N-methyltransferase EFM5 (EC 2.1.1.-) (Elongation factor methyltransferase 5)	EFM5 NCU02372	Neurospora crassa (strain ATCC 24698 / 74-OR23-1A / CBS 708.71 / DSM 1257 / FGSC 987)	277	cytoplasm [GO:0005737]; protein-lysine N-methyltransferase activity [GO:0016279]; peptidyl-lysine trimethylation [GO:0018023]					PTHR13200;	UPI0003CB4681
NCU02373	P25284	NDUA9_NEUCR	NADH-ubiquinone oxidoreductase 40 kDa subunit, mitochondrial (Complex I-40kD) (CI-40kD)	nuo40 NCU02373	Neurospora crassa (strain ATCC 24698 / 74-OR23-1A / CBS 708.71 / DSM 1257 / FGSC 987)	375	mitochondrial matrix [GO:0005759]; mitochondrial respiratory chain complex I [GO:0005747]; NADH dehydrogenase activity [GO:0003954]; ubiquinone-6 biosynthetic process [GO:1901006]			PF05368;			UPI000018A758
NCU02374	Q7S4V3	Q7S4V3_NEUCR	Proteasome regulatory particle subunit	rpn-9 NCU02374	Neurospora crassa (strain ATCC 24698 / 74-OR23-1A / CBS 708.71 / DSM 1257 / FGSC 987)	381	cytosol [GO:0005829]; nucleus [GO:0005634]; proteasome regulatory particle, lid subcomplex [GO:0008541]; structural molecule activity [GO:0005198]; proteasome assembly [GO:0043248]; ubiquitin-dependent protein catabolic process [GO:0006511]		PS50250;	PF01399;	SM00088;	PTHR10539;	UPI000018A759
NCU02375	Q7S4V2	Q7S4V2_NEUCR	Ubiquitinyl hydrolase 1 (EC 3.4.19.12)	NCU02375	Neurospora crassa (strain ATCC 24698 / 74-OR23-1A / CBS 708.71 / DSM 1257 / FGSC 987)	522	cysteine-type endopeptidase activity [GO:0004197]; thiol-dependent ubiquitin-specific protease activity [GO:0004843]; zinc ion binding [GO:0008270]; histone deubiquitination [GO:0016578]; protein deubiquitination [GO:0016579]; ubiquitin-dependent protein catabolic process [GO:0006511]		PS00973;PS50235;PS50271;	PF00443;		PTHR43961:SF2;	UPI00015C37C5
NCU02380	V5IKE8	V5IKE8_NEUCR	Threonyl-tRNA synthetase, variant 2	NCU02380	Neurospora crassa (strain ATCC 24698 / 74-OR23-1A / CBS 708.71 / DSM 1257 / FGSC 987)	788	cytoplasm [GO:0005737]; ATP binding [GO:0005524]; threonine-tRNA ligase activity [GO:0004829]; threonyl-tRNA aminoacylation [GO:0006435]		PS50862;	PF03129;PF02824;PF00587;PF07973;	SM00863;	PTHR11451;	UPI000018A75F
NCU02381	Q7S4U6	Q7S4U6_NEUCR	CDP-diacylglycerol--serine O-phosphatidyltransferase (EC 2.7.8.8) (Phosphatidylserine synthase)	NCU02381	Neurospora crassa (strain ATCC 24698 / 74-OR23-1A / CBS 708.71 / DSM 1257 / FGSC 987)	249	endoplasmic reticulum membrane [GO:0005789]; integral component of membrane [GO:0016021]; CDP-diacylglycerol-serine O-phosphatidyltransferase activity [GO:0003882]; cell growth mode switching, monopolar to bipolar [GO:0051523]; fungal-type cell wall organization or biogenesis [GO:0071852]; negative regulation of G0 to G1 transition [GO:0070317]; negative regulation of phosphatidylinositol biosynt…		PS00379;	PF01066;			UPI00015C37C7
NCU02387	Q7S4P7	Q7S4P7_NEUCR	Nuclear import and export protein Msn5	NCU02387	Neurospora crassa (strain ATCC 24698 / 74-OR23-1A / CBS 708.71 / DSM 1257 / FGSC 987)	1276	cytoplasm [GO:0005737]; nucleus [GO:0005634]; RNA nuclear export complex [GO:0042565]; nuclear export signal receptor activity [GO:0005049]; Ran GTPase binding [GO:0008536]; intracellular protein transport [GO:0006886]; regulation of protein export from nucleus [GO:0046825]		PS50166;	PF08389;	SM00913;	PTHR11223:SF3;	UPI0003CADDF1
NCU02391	Q7S4P3	SEC24_NEUCR	Protein transport protein sec24	sec24 NCU02391	Neurospora crassa (strain ATCC 24698 / 74-OR23-1A / CBS 708.71 / DSM 1257 / FGSC 987)	950	COPII vesicle coat [GO:0030127]; endoplasmic reticulum membrane [GO:0005789]; Golgi membrane [GO:0000139]; zinc ion binding [GO:0008270]; endoplasmic reticulum to Golgi vesicle-mediated transport [GO:0006888]; intracellular protein transport [GO:0006886]			PF00626;PF08033;PF04815;PF04811;PF04810;			UPI000018A795
NCU02393	V5IKE7	V5IKE7_NEUCR	Mitogen-activated protein kinase (EC 2.7.11.24)	mak-2 NCU02393	Neurospora crassa (strain ATCC 24698 / 74-OR23-1A / CBS 708.71 / DSM 1257 / FGSC 987)	352	cytoplasm [GO:0005737]; nucleus [GO:0005634]; ATP binding [GO:0005524]; MAP kinase activity [GO:0004707]; cellular response to organic substance [GO:0071310]; cellular response to osmotic stress [GO:0071470]; intracellular signal transduction [GO:0035556]; pheromone-dependent signal transduction involved in conjugation with cellular fusion [GO:0000750]; regulation of gene expression [GO:0010468]		PS01351;PS00107;PS50011;PS00108;	PF00069;	SM00220;		UPI00000699E1
NCU02395	Q7S4P0	Q7S4P0_NEUCR	Uroporphyrinogen-III synthase	NCU02395	Neurospora crassa (strain ATCC 24698 / 74-OR23-1A / CBS 708.71 / DSM 1257 / FGSC 987)	303	uroporphyrinogen-III synthase activity [GO:0004852]; heme biosynthetic process [GO:0006783]; uroporphyrinogen III biosynthetic process [GO:0006780]			PF02602;		PTHR12390;	UPI000018A798
NCU02397	Q7S4N8	Q7S4N8_NEUCR	Pyruvate decarboxylase	ilv-5 NCU02397	Neurospora crassa (strain ATCC 24698 / 74-OR23-1A / CBS 708.71 / DSM 1257 / FGSC 987)	576	cytosol [GO:0005829]; branched-chain-2-oxoacid decarboxylase activity [GO:0047433]; carboxy-lyase activity [GO:0016831]; magnesium ion binding [GO:0000287]; pyruvate decarboxylase activity [GO:0004737]; thiamine pyrophosphate binding [GO:0030976]; aromatic amino acid family catabolic process to alcohol via Ehrlich pathway [GO:0000949]; ethanol metabolic process [GO:0006067]; L-phenylalanine catab…			PF02775;PF00205;PF02776;			UPI000018A79A
NCU02399	Q7S4N6	Q7S4N6_NEUCR	Uncharacterized protein	NCU02399	Neurospora crassa (strain ATCC 24698 / 74-OR23-1A / CBS 708.71 / DSM 1257 / FGSC 987)	624							UPI0003CA166F
NCU02404	V5IL07	V5IL07_NEUCR	RNP domain-containing protein, variant 2 (RNP domain-containing protein, variant 3)	NCU02404	Neurospora crassa (strain ATCC 24698 / 74-OR23-1A / CBS 708.71 / DSM 1257 / FGSC 987)	434	RNA binding [GO:0003723]		PS50102;	PF00076;	SM00360;		UPI00021DA9A9
NCU02404	V5ILJ4	V5ILJ4_NEUCR	RNP domain-containing protein, variant 1	NCU02404	Neurospora crassa (strain ATCC 24698 / 74-OR23-1A / CBS 708.71 / DSM 1257 / FGSC 987)	483	cytoplasm [GO:0005737]; nucleus [GO:0005634]; post-mRNA release spliceosomal complex [GO:0071014]; ribonucleoprotein complex [GO:1990904]; mRNA binding [GO:0003729]; nuclear mRNA surveillance [GO:0071028]; poly(A)+ mRNA export from nucleus [GO:0016973]; regulation of mRNA stability involved in response to oxidative stress [GO:2000815]		PS50102;	PF00076;	SM00360;		UPI0003CBA7B7
NCU02405	Q7S479	Q7S479_NEUCR	Uncharacterized protein	NCU02405	Neurospora crassa (strain ATCC 24698 / 74-OR23-1A / CBS 708.71 / DSM 1257 / FGSC 987)	144	signal recognition particle, endoplasmic reticulum targeting [GO:0005786]; 7S RNA binding [GO:0008312]; endoplasmic reticulum signal peptide binding [GO:0030942]; protein targeting to ER [GO:0045047]; SRP-dependent cotranslational protein targeting to membrane [GO:0006614]			PF02290;		PTHR12013;	UPI000018A83D
NCU02407	Q7S477	Q7S477_NEUCR	Dihydrolipoyl dehydrogenase (EC 1.8.1.4)	NCU02407	Neurospora crassa (strain ATCC 24698 / 74-OR23-1A / CBS 708.71 / DSM 1257 / FGSC 987)	504	glycine cleavage complex [GO:0005960]; mitochondrial nucleoid [GO:0042645]; mitochondrial oxoglutarate dehydrogenase complex [GO:0009353]; mitochondrial pyruvate dehydrogenase complex [GO:0005967]; dihydrolipoyl dehydrogenase activity [GO:0004148]; electron transfer activity [GO:0009055]; flavin adenine dinucleotide binding [GO:0050660]; glycine dehydrogenase (decarboxylating) activity [GO:000437…		PS00076;	PF07992;PF02852;			UPI00015C3872
NCU02414	Q7S4E5	Q7S4E5_NEUCR	Translation initiation factor eif-2b epsilon subunit	NCU02414	Neurospora crassa (strain ATCC 24698 / 74-OR23-1A / CBS 708.71 / DSM 1257 / FGSC 987)	746	eukaryotic translation initiation factor 2B complex [GO:0005851]; guanyl-nucleotide exchange factor activity [GO:0005085]; translation initiation factor activity [GO:0003743]; translation initiation factor binding [GO:0031369]		PS51363;	PF00132;PF02020;	SM00515;		UPI000018A7FA
NCU02419	Q7S4E0	Q7S4E0_NEUCR	Mitochondrial 37S ribosomal protein S17	NCU02419	Neurospora crassa (strain ATCC 24698 / 74-OR23-1A / CBS 708.71 / DSM 1257 / FGSC 987)	165	cytosolic small ribosomal subunit [GO:0022627]; structural constituent of ribosome [GO:0003735]; translation [GO:0006412]			PF00366;		PTHR10744;	UPI000018A7FF
NCU02421	Q7S4D8	COG6_NEUCR	Conserved oligomeric Golgi complex subunit 6 (COG complex subunit 6) (Component of oligomeric Golgi complex 6)	cog-6 NCU02421	Neurospora crassa (strain ATCC 24698 / 74-OR23-1A / CBS 708.71 / DSM 1257 / FGSC 987)	713	Golgi membrane [GO:0000139]; Golgi transport complex [GO:0017119]; intra-Golgi vesicle-mediated transport [GO:0006891]; protein transport [GO:0015031]			PF06419;	SM01087;	PTHR21506;	UPI00015C38A9
NCU02423	Q7S4D6	Q7S4D6_NEUCR	Mitoferrin-1	NCU02423	Neurospora crassa (strain ATCC 24698 / 74-OR23-1A / CBS 708.71 / DSM 1257 / FGSC 987)	310	integral component of membrane [GO:0016021]; iron ion transmembrane transporter activity [GO:0005381]; iron import into the mitochondrion [GO:0048250]		PS50920;	PF00153;		PTHR24089;	UPI000018A803
NCU02424	Q7S4D5	Q7S4D5_NEUCR	DnaJ and TPR domain-containing protein	NCU02424	Neurospora crassa (strain ATCC 24698 / 74-OR23-1A / CBS 708.71 / DSM 1257 / FGSC 987)	517	endoplasmic reticulum [GO:0005783]; chaperone binding [GO:0051087]; misfolded protein binding [GO:0051787]; unfolded protein binding [GO:0051082]; protein folding in endoplasmic reticulum [GO:0034975]		PS50076;PS50005;PS50293;	PF00226;PF13174;	SM00271;SM00028;		UPI000018A804
NCU02428	V5IKE3	V5IKE3_NEUCR	Nucleolar essential protein 1	NCU02428	Neurospora crassa (strain ATCC 24698 / 74-OR23-1A / CBS 708.71 / DSM 1257 / FGSC 987)	265	90S preribosome [GO:0030686]; cytoplasm [GO:0005737]; nuclear microtubule [GO:0005880]; nuclear periphery [GO:0034399]; nucleolus [GO:0005730]; small-subunit processome [GO:0032040]; identical protein binding [GO:0042802]; rRNA (pseudouridine) methyltransferase activity [GO:0070037]; rRNA binding [GO:0019843]; endonucleolytic cleavage in 5'-ETS of tricistronic rRNA transcript (SSU-rRNA, 5.8S rRNA…			PF03587;		PTHR12636;	UPI0003CA11E6
NCU02428	V5ILI2	V5ILI2_NEUCR	Nucleolar essential protein 1, variant	NCU02428	Neurospora crassa (strain ATCC 24698 / 74-OR23-1A / CBS 708.71 / DSM 1257 / FGSC 987)	257	methyltransferase activity [GO:0008168]			PF03587;		PTHR12636;	UPI000018A8A1
NCU02430	P38675	MET7_NEUCR	Cystathionine gamma-synthase (EC 2.5.1.48) (O-succinylhomoserine (thiol)-lyase)	met-7 NCU02430	Neurospora crassa (strain ATCC 24698 / 74-OR23-1A / CBS 708.71 / DSM 1257 / FGSC 987)	621	cystathionine gamma-synthase activity [GO:0003962]; pyridoxal phosphate binding [GO:0030170]; methionine biosynthetic process [GO:0009086]; transsulfuration [GO:0019346]			PF01053;			UPI00015C38D4
NCU02433	Q7S3X7	ATG4_NEUCR	Cysteine protease 1 (EC 3.4.22.-) (Autophagy-related protein 4)	cpr-1 atg4 NCU02433	Neurospora crassa (strain ATCC 24698 / 74-OR23-1A / CBS 708.71 / DSM 1257 / FGSC 987)	506	cytoplasm [GO:0005737]; nucleus [GO:0005634]; cysteine-type peptidase activity [GO:0008234]; autophagy [GO:0006914]; protein transport [GO:0015031]			PF03416;		PTHR22624;	UPI000018A8A6
NCU02435	P37210	H2B_NEUCR	Histone H2B	hh2b NCU02435	Neurospora crassa (strain ATCC 24698 / 74-OR23-1A / CBS 708.71 / DSM 1257 / FGSC 987)	137	nucleosome [GO:0000786]; nucleus [GO:0005634]; DNA binding [GO:0003677]; protein heterodimerization activity [GO:0046982]		PS00357;	PF00125;	SM00427;	PTHR23428;	UPI000006BAA2
NCU02437	Q8X132	H2A_NEUCR	Histone H2A	hh2a hta-1 NCU02437	Neurospora crassa (strain ATCC 24698 / 74-OR23-1A / CBS 708.71 / DSM 1257 / FGSC 987)	134	nuclear chromatin [GO:0000790]; nucleosome [GO:0000786]; DNA binding [GO:0003677]; protein heterodimerization activity [GO:0046982]; chromatin organization [GO:0006325]; DNA repair [GO:0006281]		PS00046;	PF00125;PF16211;	SM00414;		UPI000006A23B
NCU02438	Q7S3Y3	Q7S3Y3_NEUCR	Dihydrolipoamide succinyltransferase	NCU02438	Neurospora crassa (strain ATCC 24698 / 74-OR23-1A / CBS 708.71 / DSM 1257 / FGSC 987)	423	oxoglutarate dehydrogenase complex [GO:0045252]; dihydrolipoyllysine-residue succinyltransferase activity [GO:0004149]; tricarboxylic acid cycle [GO:0006099]		PS50968;PS00189;	PF00198;PF00364;			UPI000018A89F
NCU02450	V5IKE2	V5IKE2_NEUCR	Threonine dehydratase (EC 4.3.1.19) (Threonine deaminase)	NCU02450	Neurospora crassa (strain ATCC 24698 / 74-OR23-1A / CBS 708.71 / DSM 1257 / FGSC 987)	454	L-threonine ammonia-lyase activity [GO:0004794]; isoleucine biosynthetic process [GO:0009097]		PS51672;	PF00291;PF00585;			UPI0003CABDCC
NCU02450	V5IKK2	V5IKK2_NEUCR	Threonine dehydratase (EC 4.3.1.19) (Threonine deaminase)	NCU02450	Neurospora crassa (strain ATCC 24698 / 74-OR23-1A / CBS 708.71 / DSM 1257 / FGSC 987)	584	L-threonine ammonia-lyase activity [GO:0004794]; pyridoxal phosphate binding [GO:0030170]; isoleucine biosynthetic process [GO:0009097]; threonine catabolic process [GO:0006567]; threonine metabolic process [GO:0006566]		PS51672;PS00165;	PF00291;PF00585;			UPI0003CB01E2
NCU02451	Q7S455	RCF1_NEUCR	Respiratory supercomplex factor 1, mitochondrial	rcf1 NCU02451	Neurospora crassa (strain ATCC 24698 / 74-OR23-1A / CBS 708.71 / DSM 1257 / FGSC 987)	221	integral component of membrane [GO:0016021]; mitochondrial membrane [GO:0031966]		PS51503;	PF04588;			UPI00015C3DC8
NCU02453	V5IMH6	V5IMH6_NEUCR	Uncharacterized protein	NCU02453	Neurospora crassa (strain ATCC 24698 / 74-OR23-1A / CBS 708.71 / DSM 1257 / FGSC 987)	126			PS51073;	PF02755;	SM00707;		UPI0003C9F655
NCU02455	O60046	FKBP2_NEUCR	FK506-binding protein 2 (FKBP2) (EC 5.2.1.8) (FK506-resistance protein 5) (NcFKBP22) (Peptidyl-prolyl cis-trans isomerase fkr-5) (PPIase fkr-5)	fkr-5 NCU02455	Neurospora crassa (strain ATCC 24698 / 74-OR23-1A / CBS 708.71 / DSM 1257 / FGSC 987)	217	endoplasmic reticulum lumen [GO:0005788]; peptidyl-prolyl cis-trans isomerase activity [GO:0003755]		PS00014;PS50059;	PF00254;		PTHR10516;	UPI000012A812
NCU02464	Q7RW14	Q7RW14_NEUCR	Neuronal-specific septin-3	NCU02464	Neurospora crassa (strain ATCC 24698 / 74-OR23-1A / CBS 708.71 / DSM 1257 / FGSC 987)	390	cytosol [GO:0005829]; microtubule cytoskeleton [GO:0015630]; septin complex [GO:0031105]; septin ring [GO:0005940]; GTP binding [GO:0005525]; GTPase activity [GO:0003924]; protein-containing complex scaffold activity [GO:0032947]; cilium assembly [GO:0060271]; cytoskeleton-dependent cytokinesis [GO:0061640]		PS51719;	PF00735;			UPI00015C357F
NCU02468	Q7SG95	Q7SG95_NEUCR	Longevity-assurance protein	NCU02468	Neurospora crassa (strain ATCC 24698 / 74-OR23-1A / CBS 708.71 / DSM 1257 / FGSC 987)	509	endoplasmic reticulum [GO:0005783]; integral component of membrane [GO:0016021]; sphingosine N-acyltransferase activity [GO:0050291]; ceramide biosynthetic process [GO:0046513]		PS50922;	PF08390;PF03798;	SM00724;	PTHR12560;	UPI000018973C
NCU02472	P21976	NDUA8_NEUCR	NADH-ubiquinone oxidoreductase 20.8 kDa subunit	B1O14.280 NCU02472	Neurospora crassa (strain ATCC 24698 / 74-OR23-1A / CBS 708.71 / DSM 1257 / FGSC 987)	183	mitochondrial respiratory chain complex I [GO:0005747]; mitochondrial electron transport, NADH to ubiquinone [GO:0006120]		PS51808;	PF06747;		PTHR13344;	UPI0000189740
NCU02473	Q7SG91	Q7SG91_NEUCR	Nucleoporin Nup44	NCU02473	Neurospora crassa (strain ATCC 24698 / 74-OR23-1A / CBS 708.71 / DSM 1257 / FGSC 987)	320	nuclear pore central transport channel [GO:0044613]; structural constituent of nuclear pore [GO:0017056]; NLS-bearing protein import into nucleus [GO:0006607]; nuclear pore organization [GO:0006999]; protein localization to nuclear inner membrane [GO:0036228]			PF13874;		PTHR13000;	UPI0000189741
NCU02474	Q7SG90	Q7SG90_NEUCR	Outer mitochondrial membrane translocase 5	tom5 NCU02474	Neurospora crassa (strain ATCC 24698 / 74-OR23-1A / CBS 708.71 / DSM 1257 / FGSC 987)	50	integral component of mitochondrial outer membrane [GO:0031307]; mitochondrial outer membrane translocase complex [GO:0005742]; mitochondrial outer membrane translocase complex assembly [GO:0070096]; protein targeting to mitochondrion [GO:0006626]; protein transmembrane transport [GO:0071806]			PF10642;			UPI00002246FE
NCU02475	Q7SG89	Q7SG89_NEUCR	Glycine cleavage system P protein (EC 1.4.4.2)	NCU02475	Neurospora crassa (strain ATCC 24698 / 74-OR23-1A / CBS 708.71 / DSM 1257 / FGSC 987)	1100	glycine cleavage complex [GO:0005960]; mitochondrion [GO:0005739]; glycine binding [GO:0016594]; glycine dehydrogenase (decarboxylating) activity [GO:0004375]; pyridoxal phosphate binding [GO:0030170]; glycine decarboxylation via glycine cleavage system [GO:0019464]			PF02347;		PTHR11773;	UPI0000189743
NCU02477	Q7SG87	Q7SG87_NEUCR	Ribosome biogenesis protein Sqt1	NCU02477	Neurospora crassa (strain ATCC 24698 / 74-OR23-1A / CBS 708.71 / DSM 1257 / FGSC 987)	539	unfolded protein binding [GO:0051082]; ribosomal large subunit biogenesis [GO:0042273]		PS50082;PS50294;	PF00400;	SM00320;		UPI0000189745
NCU02478	Q7SG86	Q7SG86_NEUCR	Alpha-1,3-glucan synthase Ags2	NCU02478	Neurospora crassa (strain ATCC 24698 / 74-OR23-1A / CBS 708.71 / DSM 1257 / FGSC 987)	2390	fungal-type cell wall [GO:0009277]; integral component of membrane [GO:0016021]; alpha-1,3-glucan synthase activity [GO:0047657]; fungal-type cell wall (1->3)-alpha-glucan biosynthetic process [GO:0070600]; fungal-type cell wall biogenesis [GO:0009272]			PF00128;PF08323;	SM00642;		UPI00004CEC32
NCU02479	Q7SG85	Q7SG85_NEUCR	Glutamine synthetase	NCU02479	Neurospora crassa (strain ATCC 24698 / 74-OR23-1A / CBS 708.71 / DSM 1257 / FGSC 987)	484	glutamate-ammonia ligase activity [GO:0004356]; transcription factor binding [GO:0008134]; glutamine biosynthetic process [GO:0006542]; polyamine catabolic process [GO:0006598]			PF00120;	SM01230;		UPI0000189747
NCU02480	V5IP82	V5IP82_NEUCR	Short-chain dehydrogenase/reductase, variant	NCU02480	Neurospora crassa (strain ATCC 24698 / 74-OR23-1A / CBS 708.71 / DSM 1257 / FGSC 987)	282	oxidoreductase activity [GO:0016491]		PS00061;				UPI0000189748
NCU02481	Q7SG83	Q7SG83_NEUCR	Mitochondrial 2-methylisocitrate lyase	NCU02481	Neurospora crassa (strain ATCC 24698 / 74-OR23-1A / CBS 708.71 / DSM 1257 / FGSC 987)	618	mitochondrial matrix [GO:0005759]; isocitrate lyase activity [GO:0004451]; metal ion binding [GO:0046872]; methylisocitrate lyase activity [GO:0046421]; propionate catabolic process, 2-methylcitrate cycle [GO:0019629]		PS00161;	PF00463;		PTHR21631;	UPI0000189749
NCU02482	V5IQA3	V5IQA3_NEUCR	Citrate synthase	tca-2 NCU02482	Neurospora crassa (strain ATCC 24698 / 74-OR23-1A / CBS 708.71 / DSM 1257 / FGSC 987)	470	mitochondrial matrix [GO:0005759]; 2-methylcitrate synthase activity [GO:0050440]; citrate (Si)-synthase activity [GO:0004108]; carbohydrate metabolic process [GO:0005975]; propionate metabolic process, methylcitrate cycle [GO:0019679]; tricarboxylic acid cycle [GO:0006099]		PS00480;	PF00285;		PTHR11739;	UPI000018974A
NCU02490	Q7SG74	Q7SG74_NEUCR	DnaJ domain-containing protein	NCU02490	Neurospora crassa (strain ATCC 24698 / 74-OR23-1A / CBS 708.71 / DSM 1257 / FGSC 987)	461	integral component of membrane [GO:0016021]		PS50076;	PF00226;	SM00271;		UPI0003C9FF62
NCU02492	Q7SG72	Q7SG72_NEUCR	Uncharacterized protein	NCU02492	Neurospora crassa (strain ATCC 24698 / 74-OR23-1A / CBS 708.71 / DSM 1257 / FGSC 987)	268							UPI0000189754
NCU02493	Q7SG71	Q7SG71_NEUCR	Proteasome subunit alpha type (EC 3.4.25.1)	NCU02493	Neurospora crassa (strain ATCC 24698 / 74-OR23-1A / CBS 708.71 / DSM 1257 / FGSC 987)	297	cytoplasm [GO:0005737]; nucleus [GO:0005634]; proteasome core complex [GO:0005839]; proteasome core complex, alpha-subunit complex [GO:0019773]; endopeptidase activity [GO:0004175]; threonine-type endopeptidase activity [GO:0004298]; proteasomal protein catabolic process [GO:0010498]; proteasomal ubiquitin-independent protein catabolic process [GO:0010499]; proteasome-mediated ubiquitin-dependent…		PS00388;PS51475;	PF00227;PF10584;	SM00948;	PTHR11599:SF10;	UPI0000189755
NCU02494	Q7SG70	Q7SG70_NEUCR	Uncharacterized protein	NCU02494	Neurospora crassa (strain ATCC 24698 / 74-OR23-1A / CBS 708.71 / DSM 1257 / FGSC 987)	2626	90S preribosome [GO:0030686]; nucleolus [GO:0005730]; small-subunit processome [GO:0032040]		PS50077;	PF07539;			UPI00015C34F2
NCU02497	Q7SG67	Q7SG67_NEUCR	Uncharacterized protein	NCU02497	Neurospora crassa (strain ATCC 24698 / 74-OR23-1A / CBS 708.71 / DSM 1257 / FGSC 987)	1024	nucleolus [GO:0005730]; rDNA binding [GO:0000182]; transcription factor binding [GO:0008134]; regulation of transcription, DNA-templated [GO:0006355]			PF04931;		PTHR13213;	UPI0000189759
NCU02498	Q7SG66	Q7SG66_NEUCR	Cullin-3	NCU02498	Neurospora crassa (strain ATCC 24698 / 74-OR23-1A / CBS 708.71 / DSM 1257 / FGSC 987)	838	Cul4-RING E3 ubiquitin ligase complex [GO:0080008]; cullin-RING ubiquitin ligase complex [GO:0031461]; SCF ubiquitin ligase complex [GO:0019005]; ubiquitin protein ligase binding [GO:0031625]; cellular response to DNA damage stimulus [GO:0006974]; proteasome-mediated ubiquitin-dependent protein catabolic process [GO:0043161]; protein ubiquitination [GO:0016567]; SCF-dependent proteasomal ubiquiti…		PS50069;	PF00888;PF10557;	SM00182;SM00884;		UPI000018975A
NCU02505	Q7SHV6	Q7SHV6_NEUCR	Pyruvate carboxylase (EC 6.4.1.1)	suc NCU02505	Neurospora crassa (strain ATCC 24698 / 74-OR23-1A / CBS 708.71 / DSM 1257 / FGSC 987)	1192	cytoplasm [GO:0005737]; ATP binding [GO:0005524]; biotin binding [GO:0009374]; metal ion binding [GO:0046872]; pyruvate carboxylase activity [GO:0004736]; gluconeogenesis [GO:0006094]; pyruvate metabolic process [GO:0006090]		PS50975;PS50979;PS00188;PS50968;PS00866;PS00867;PS50991;	PF02785;PF00289;PF00364;PF02786;PF00682;PF02436;	SM00878;		UPI0003CA636C
NCU02508	Q7SHV3	Q7SHV3_NEUCR	Uncharacterized protein	NCU02508	Neurospora crassa (strain ATCC 24698 / 74-OR23-1A / CBS 708.71 / DSM 1257 / FGSC 987)	213	catalytic step 2 spliceosome [GO:0071013]; cytoplasm [GO:0005737]; U1 snRNP [GO:0005685]; U2 snRNP [GO:0005686]; U2-type prespliceosome [GO:0071004]; U4 snRNP [GO:0005687]; U4/U6 x U5 tri-snRNP complex [GO:0046540]; U5 snRNP [GO:0005682]; mRNA splicing, via spliceosome [GO:0000398]			PF01423;	SM00651;		UPI0000189506
NCU02509	Q7RVN0	RL11_NEUCR	60S ribosomal protein L11	rpl-11 NCU02509	Neurospora crassa (strain ATCC 24698 / 74-OR23-1A / CBS 708.71 / DSM 1257 / FGSC 987)	174	cytosolic large ribosomal subunit [GO:0022625]; nucleus [GO:0005634]; rRNA binding [GO:0019843]; structural constituent of ribosome [GO:0003735]; ribosomal large subunit assembly [GO:0000027]; translation [GO:0006412]		PS00358;	PF00281;PF00673;		PTHR11994;	UPI00015C34BB
NCU02510	Q7SHV2	Q7SHV2_NEUCR	Clathrin heavy chain	NCU02510	Neurospora crassa (strain ATCC 24698 / 74-OR23-1A / CBS 708.71 / DSM 1257 / FGSC 987)	1678	actin cortical patch [GO:0030479]; clathrin coat of coated pit [GO:0030132]; clathrin coat of trans-Golgi network vesicle [GO:0030130]; clathrin complex [GO:0071439]; cytosol [GO:0005829]; clathrin light chain binding [GO:0032051]; structural molecule activity [GO:0005198]; clathrin coat assembly [GO:0048268]; Golgi to endosome transport [GO:0006895]; intracellular protein transport [GO:0006886];…		PS50236;	PF00637;PF01394;	SM00299;		UPI0000189508
NCU02511	Q7SHV1	Q7SHV1_NEUCR	tRNA (Cytosine-5-)-methyltransferase NCL1	NCU02511	Neurospora crassa (strain ATCC 24698 / 74-OR23-1A / CBS 708.71 / DSM 1257 / FGSC 987)	771	nucleolus [GO:0005730]; preribosome, large subunit precursor [GO:0030687]; RNA binding [GO:0003723]; rRNA (cytosine-C5-)-methyltransferase activity [GO:0009383]; assembly of large subunit precursor of preribosome [GO:1902626]; maturation of LSU-rRNA from tricistronic rRNA transcript (SSU-rRNA, 5.8S rRNA, LSU-rRNA) [GO:0000463]; rRNA base methylation [GO:0070475]		PS01153;PS51686;	PF01189;PF17125;			UPI0003CA60B4
NCU02513	Q7SHU9	NNRD_NEUCR	ATP-dependent (S)-NAD(P)H-hydrate dehydratase (EC 4.2.1.93) (ATP-dependent NAD(P)HX dehydratase)	NCU02513	Neurospora crassa (strain ATCC 24698 / 74-OR23-1A / CBS 708.71 / DSM 1257 / FGSC 987)	353	cytoplasm [GO:0005737]; ADP-dependent NAD(P)H-hydrate dehydratase activity [GO:0052855]; ATP binding [GO:0005524]; ATP-dependent NAD(P)H-hydrate dehydratase activity [GO:0047453]; nicotinamide nucleotide metabolic process [GO:0046496]		PS01050;PS51383;	PF01256;			UPI000018950B
NCU02514	P37211	ATPA_NEUCR	ATP synthase subunit alpha, mitochondrial	atp-1 NCU02514	Neurospora crassa (strain ATCC 24698 / 74-OR23-1A / CBS 708.71 / DSM 1257 / FGSC 987)	551	mitochondrial proton-transporting ATP synthase complex, catalytic core F(1) [GO:0000275]; ADP binding [GO:0043531]; ATP binding [GO:0005524]; proton-transporting ATP synthase activity, rotational mechanism [GO:0046933]; ATP biosynthetic process [GO:0006754]; ATP metabolic process [GO:0046034]; ATP synthesis coupled proton transport [GO:0015986]; electron transport chain [GO:0022900]; response to …		PS00152;	PF00006;PF00306;PF02874;			UPI00001263FF
NCU02520	Q7SHU3	Q7SHU3_NEUCR	Thioredoxin	NCU02520	Neurospora crassa (strain ATCC 24698 / 74-OR23-1A / CBS 708.71 / DSM 1257 / FGSC 987)	324	cell [GO:0005623]; cell redox homeostasis [GO:0045454]		PS51532;	PF06201;PF00085;			UPI00015C377C
NCU02530	Q7SHT3	Q7SHT3_NEUCR	Cytochrome c oxidase copper chaperone Cox17	NCU02530	Neurospora crassa (strain ATCC 24698 / 74-OR23-1A / CBS 708.71 / DSM 1257 / FGSC 987)	78	cytosol [GO:0005829]; mitochondrial intermembrane space [GO:0005758]; copper chaperone activity [GO:0016531]; cuprous ion binding [GO:1903136]; aerobic respiration [GO:0009060]; copper ion transport [GO:0006825]; mitochondrial respiratory chain complex IV assembly [GO:0033617]; protein farnesylation [GO:0018343]; protein maturation by copper ion transfer [GO:0015680]			PF05051;		PTHR16719;	UPI000018951B
NCU02532	V5IP93	V5IP93_NEUCR	NEDD8-activating enzyme E1 catalytic subunit, variant	NCU02532	Neurospora crassa (strain ATCC 24698 / 74-OR23-1A / CBS 708.71 / DSM 1257 / FGSC 987)	359	acid-amino acid ligase activity [GO:0016881]; ATP binding [GO:0005524]; NEDD8 activating enzyme activity [GO:0019781]; protein neddylation [GO:0045116]			PF08825;PF00899;	SM01181;	PTHR10953:SF6;	UPI0003CA5792
NCU02532	V5IRG0	V5IRG0_NEUCR	NEDD8-activating enzyme E1 catalytic subunit	NCU02532	Neurospora crassa (strain ATCC 24698 / 74-OR23-1A / CBS 708.71 / DSM 1257 / FGSC 987)	435	cytoplasm [GO:0005737]; nucleus [GO:0005634]; acid-amino acid ligase activity [GO:0016881]; ATP binding [GO:0005524]; NEDD8 activating enzyme activity [GO:0019781]; protein modification by small protein conjugation [GO:0032446]; protein neddylation [GO:0045116]			PF08825;PF00899;	SM01181;	PTHR10953:SF6;	UPI0003CB4D99
NCU02533	Q7SHT0	Q7SHT0_NEUCR	DNA-directed RNA polymerase I and III polypeptide	NCU02533	Neurospora crassa (strain ATCC 24698 / 74-OR23-1A / CBS 708.71 / DSM 1257 / FGSC 987)	378	RNA polymerase I complex [GO:0005736]; RNA polymerase III complex [GO:0005666]; DNA-directed 5'-3' RNA polymerase activity [GO:0003899]; protein dimerization activity [GO:0046983]; transcription by RNA polymerase I [GO:0006360]; transcription by RNA polymerase III [GO:0006383]			PF01000;PF01193;	SM00662;	PTHR11800:SF13;	UPI000018951E
NCU02534	P22142	NDUS2_NEUCR	NADH-ubiquinone oxidoreductase 49 kDa subunit, mitochondrial (EC 1.6.99.3) (EC 7.1.1.2) (Complex I-49kD) (CI-49kD)	nuo-49 NCU02534	Neurospora crassa (strain ATCC 24698 / 74-OR23-1A / CBS 708.71 / DSM 1257 / FGSC 987)	478	mitochondrial inner membrane [GO:0005743]; respirasome [GO:0070469]; 4 iron, 4 sulfur cluster binding [GO:0051539]; metal ion binding [GO:0046872]; NAD binding [GO:0051287]; NADH dehydrogenase activity [GO:0003954]; quinone binding [GO:0048038]		PS00535;	PF00346;			UPI00015C3756
NCU02536	Q7SHS8	Q7SHS8_NEUCR	Ubiquinone biosynthesis monooxygenase COQ6, mitochondrial (EC 1.14.13.-)	COQ6 NCU02536	Neurospora crassa (strain ATCC 24698 / 74-OR23-1A / CBS 708.71 / DSM 1257 / FGSC 987)	490	extrinsic component of mitochondrial inner membrane [GO:0031314]; mitochondrion [GO:0005739]; FAD binding [GO:0071949]; oxidoreductase activity [GO:0016491]; oxidoreductase activity, acting on paired donors, with incorporation or reduction of molecular oxygen, NAD(P)H as one donor, and incorporation of one atom of oxygen [GO:0016709]; oxidoreductase activity, acting on paired donors, with incorpo…		PS01304;	PF01494;			UPI0000189521
NCU02538	Q7SHS6	Q7SHS6_NEUCR	Coatomer zeta subunit	NCU02538	Neurospora crassa (strain ATCC 24698 / 74-OR23-1A / CBS 708.71 / DSM 1257 / FGSC 987)	208	COPI vesicle coat [GO:0030126]; intra-Golgi vesicle-mediated transport [GO:0006891]; intracellular protein transport [GO:0006886]; retrograde vesicle-mediated transport, Golgi to endoplasmic reticulum [GO:0006890]			PF01217;		PTHR11043;	UPI0000189523
NCU02539	Q7SHS5	Q7SHS5_NEUCR	DNA helicase (EC 3.6.4.12)	NCU02539	Neurospora crassa (strain ATCC 24698 / 74-OR23-1A / CBS 708.71 / DSM 1257 / FGSC 987)	1013	MCM complex [GO:0042555]; nucleus [GO:0005634]; ATP binding [GO:0005524]; DNA binding [GO:0003677]; DNA helicase activity [GO:0003678]; cell division [GO:0051301]; DNA replication initiation [GO:0006270]		PS00847;PS50051;	PF00493;PF14551;PF17207;	SM00350;	PTHR11630;PTHR11630:SF66;	UPI0000189524
NCU02541	Q7SHS3	Q7SHS3_NEUCR	Dolichyl-diphosphooligosaccharide--protein glycosyltransferase subunit 1	NCU02541	Neurospora crassa (strain ATCC 24698 / 74-OR23-1A / CBS 708.71 / DSM 1257 / FGSC 987)	501	integral component of membrane [GO:0016021]; oligosaccharyltransferase complex [GO:0008250]; dolichyl-diphosphooligosaccharide-protein glycotransferase activity [GO:0004579]; protein N-linked glycosylation via asparagine [GO:0018279]			PF04597;		PTHR21049;	UPI0000189526
NCU02542	V5IP39	V5IP39_NEUCR	Phosphotransferase (EC 2.7.1.-)	emp-1 NCU02542	Neurospora crassa (strain ATCC 24698 / 74-OR23-1A / CBS 708.71 / DSM 1257 / FGSC 987)	489	cell [GO:0005623]; ATP binding [GO:0005524]; glucose binding [GO:0005536]; hexokinase activity [GO:0004396]; cellular glucose homeostasis [GO:0001678]; glycolytic process [GO:0006096]		PS00378;PS51748;	PF00349;PF03727;		PTHR19443;	UPI00015C3717
NCU02542	V5IP98	V5IP98_NEUCR	Phosphotransferase (EC 2.7.1.-)	emp-1 NCU02542	Neurospora crassa (strain ATCC 24698 / 74-OR23-1A / CBS 708.71 / DSM 1257 / FGSC 987)	501	cytosol [GO:0005829]; ATP binding [GO:0005524]; fructokinase activity [GO:0008865]; glucokinase activity [GO:0004340]; glucose binding [GO:0005536]; mannokinase activity [GO:0019158]; cellular glucose homeostasis [GO:0001678]; glycolytic process [GO:0006096]		PS00378;PS51748;	PF00349;PF03727;		PTHR19443;	UPI00021DA8A9
NCU02544	Q7SHS0	Q7SHS0_NEUCR	ABC transporter	NCU02544	Neurospora crassa (strain ATCC 24698 / 74-OR23-1A / CBS 708.71 / DSM 1257 / FGSC 987)	1078	integral component of membrane [GO:0016021]; plasma membrane [GO:0005886]; ATP binding [GO:0005524]; ATPase activity, coupled to transmembrane movement of substances [GO:0042626]; transmembrane transport [GO:0055085]		PS00211;PS50893;PS00022;PS50026;	PF01061;PF00005;	SM00382;		UPI0000189529
NCU02545	Q7SHR9	Q7SHR9_NEUCR	Uncharacterized protein	NCU02545	Neurospora crassa (strain ATCC 24698 / 74-OR23-1A / CBS 708.71 / DSM 1257 / FGSC 987)	316							UPI000018952A
NCU02546	Q7SHR8	NOG2_NEUCR	Nucleolar GTP-binding protein 2	nog-2 NCU02546	Neurospora crassa (strain ATCC 24698 / 74-OR23-1A / CBS 708.71 / DSM 1257 / FGSC 987)	619	nucleolus [GO:0005730]; GTP binding [GO:0005525]; ribosome biogenesis [GO:0042254]		PS51721;	PF01926;PF08153;		PTHR11089:SF9;	UPI000018952B
NCU02549	P11913	MPPB_NEUCR	Mitochondrial-processing peptidase subunit beta (EC 3.4.24.64) (Beta-MPP) (Ubiquinol-cytochrome-c reductase complex core protein I)	pep NCU02549	Neurospora crassa (strain ATCC 24698 / 74-OR23-1A / CBS 708.71 / DSM 1257 / FGSC 987)	476	mitochondrial processing peptidase complex [GO:0017087]; mitochondrial respiratory chain complex III [GO:0005750]; metal ion binding [GO:0046872]; metalloendopeptidase activity [GO:0004222]; aerobic respiration [GO:0009060]; mitochondrial electron transport, ubiquinol to cytochrome c [GO:0006122]; protein processing involved in protein targeting to mitochondrion [GO:0006627]		PS00143;	PF00675;PF05193;		PTHR11851:SF103;	UPI000012F4AB
NCU02555	Q7SHR0	ARP4_NEUCR	Actin-related protein 4 (Actin-like protein 4)	arp-4 NCU02555	Neurospora crassa (strain ATCC 24698 / 74-OR23-1A / CBS 708.71 / DSM 1257 / FGSC 987)	469	nucleus [GO:0005634]; chromatin organization [GO:0006325]; DNA repair [GO:0006281]		PS00432;	PF00022;	SM00268;	PTHR11937;	UPI00006275F1
NCU02560	Q7SHQ5	Q7SHQ5_NEUCR	Uncharacterized protein	NCU02560	Neurospora crassa (strain ATCC 24698 / 74-OR23-1A / CBS 708.71 / DSM 1257 / FGSC 987)	370	dioxygenase activity [GO:0051213]						UPI00015C36F9
NCU02561	Q7SHQ4	Q7SHQ4_NEUCR	Uncharacterized protein	NCU02561	Neurospora crassa (strain ATCC 24698 / 74-OR23-1A / CBS 708.71 / DSM 1257 / FGSC 987)	333	integral component of membrane [GO:0016021]			PF14610;			UPI0000189539
NCU02563	Q7SHQ2	Q7SHQ2_NEUCR	Transcription elongation factor S-II	NCU02563	Neurospora crassa (strain ATCC 24698 / 74-OR23-1A / CBS 708.71 / DSM 1257 / FGSC 987)	298	nucleus [GO:0005634]; translation elongation factor activity [GO:0003746]; zinc ion binding [GO:0008270]; regulation of transcription, DNA-templated [GO:0006355]; transcription, DNA-templated [GO:0006351]		PS51321;PS51319;PS00466;PS51133;	PF08711;PF01096;PF07500;	SM00510;SM00509;SM00440;		UPI000018953B
NCU02565	Q7SHQ0	Q7SHQ0_NEUCR	Protein arginine methyltransferase NDUFAF7 (EC 2.1.1.320)	NCU02565	Neurospora crassa (strain ATCC 24698 / 74-OR23-1A / CBS 708.71 / DSM 1257 / FGSC 987)	508	mitochondrion [GO:0005739]; protein-arginine omega-N symmetric methyltransferase activity [GO:0035243]			PF02636;		PTHR12049;	UPI0003CAF612
NCU02566	Q7SHP9	Q7SHP9_NEUCR	Alanine--tRNA ligase (EC 6.1.1.7) (Alanyl-tRNA synthetase) (AlaRS)	ALA1 NCU02566	Neurospora crassa (strain ATCC 24698 / 74-OR23-1A / CBS 708.71 / DSM 1257 / FGSC 987)	1105	mitochondrion [GO:0005739]; alanine-tRNA ligase activity [GO:0004813]; amino acid binding [GO:0016597]; ATP binding [GO:0005524]; tRNA binding [GO:0000049]; zinc ion binding [GO:0008270]; alanyl-tRNA aminoacylation [GO:0006419]; mitochondrial alanyl-tRNA aminoacylation [GO:0070143]; tRNA modification [GO:0006400]		PS50860;	PF02272;PF01411;PF07973;	SM00863;		UPI0003CAD866
NCU02570	Q7SHP5	Q7SHP5_NEUCR	WD domain-containing protein	NCU02570	Neurospora crassa (strain ATCC 24698 / 74-OR23-1A / CBS 708.71 / DSM 1257 / FGSC 987)	336			PS00678;PS50082;PS50294;	PF00400;	SM00320;	PTHR22889;	UPI00015C36C1
NCU02571	Q7SHP4	Q7SHP4_NEUCR	Acetyl-CoA acetyltransferase	NCU02571	Neurospora crassa (strain ATCC 24698 / 74-OR23-1A / CBS 708.71 / DSM 1257 / FGSC 987)	399	mitochondrion [GO:0005739]; acetyl-CoA C-acetyltransferase activity [GO:0003985]; acetyl-CoA C-acyltransferase activity [GO:0003988]; ergosterol biosynthetic process [GO:0006696]; fatty acid beta-oxidation [GO:0006635]		PS00098;PS00737;	PF02803;PF00108;			UPI00015C36C0
NCU02572	Q7SHP3	Q7SHP3_NEUCR	U5 small nuclear ribonucleoprotein component	NCU02572	Neurospora crassa (strain ATCC 24698 / 74-OR23-1A / CBS 708.71 / DSM 1257 / FGSC 987)	985	cytosol [GO:0005829]; ribonucleoprotein complex [GO:1990904]; U2-type catalytic step 2 spliceosome [GO:0071007]; U4/U6 x U5 tri-snRNP complex [GO:0046540]; GTP binding [GO:0005525]; GTPase activity [GO:0003924]; U5 snRNA binding [GO:0030623]; mRNA splicing, via spliceosome [GO:0000398]		PS51722;	PF00679;PF03764;PF16004;PF00009;PF03144;	SM00838;SM00889;		UPI0000189544
NCU02573	V5IRG6	V5IRG6_NEUCR	FAM96B, variant	NCU02573	Neurospora crassa (strain ATCC 24698 / 74-OR23-1A / CBS 708.71 / DSM 1257 / FGSC 987)	208	iron-sulfur cluster assembly [GO:0016226]			PF01883;		PTHR12377;	UPI0003CABDC1
NCU02578	V5IRH1	V5IRH1_NEUCR	Paired amphipathic helix protein Sin3a, variant	NCU02578	Neurospora crassa (strain ATCC 24698 / 74-OR23-1A / CBS 708.71 / DSM 1257 / FGSC 987)	1490	chromatin [GO:0000785]; Sin3-type complex [GO:0070822]; transcription corepressor activity [GO:0003714]; histone deacetylation [GO:0016575]; negative regulation of transcription by RNA polymerase II [GO:0000122]		PS51477;	PF02671;PF08295;PF16879;	SM00761;	PTHR12346;	UPI0003CACD36
NCU02579	Q6MV78	YFAS1_NEUCR	FAS1 domain-containing protein NCU02579	B5K2.060 NCU02579	Neurospora crassa (strain ATCC 24698 / 74-OR23-1A / CBS 708.71 / DSM 1257 / FGSC 987)	228	vacuole [GO:0005773]					PTHR28156;	UPI0000224701
NCU02580	Q7SHN7	Q7SHN7_NEUCR	Fumarate reductase Osm1	NCU02580	Neurospora crassa (strain ATCC 24698 / 74-OR23-1A / CBS 708.71 / DSM 1257 / FGSC 987)	616	succinate dehydrogenase activity [GO:0000104]		PS50255;	PF00173;PF00890;	SM01117;		UPI000018954C
NCU02585	Q7SHN3	Q7SHN3_NEUCR	Aspartyl-tRNA synthetase	NCU02585	Neurospora crassa (strain ATCC 24698 / 74-OR23-1A / CBS 708.71 / DSM 1257 / FGSC 987)	715	aminoacyl-tRNA ligase activity [GO:0004812]; ATP binding [GO:0005524]; tRNA aminoacylation for protein translation [GO:0006418]		PS50862;	PF00152;		PTHR22594:SF5;	UPI0000189551
NCU02588	V5IQG2	V5IQG2_NEUCR	Nuclear movement protein nudC, variant 1	NCU02588	Neurospora crassa (strain ATCC 24698 / 74-OR23-1A / CBS 708.71 / DSM 1257 / FGSC 987)	191	cytoplasm [GO:0005737]; unfolded protein binding [GO:0051082]; developmental process [GO:0032502]; protein folding [GO:0006457]		PS51203;	PF04969;		PTHR12356;	UPI000018977D
NCU02588	V5IRH3	V5IRH3_NEUCR	Nuclear movement protein nudC, variant 2	NCU02588	Neurospora crassa (strain ATCC 24698 / 74-OR23-1A / CBS 708.71 / DSM 1257 / FGSC 987)	189			PS51203;	PF04969;		PTHR12356;	UPI0003CA9E79
NCU02595	Q7SG25	Q7SG25_NEUCR	Uncharacterized protein	NCU02595	Neurospora crassa (strain ATCC 24698 / 74-OR23-1A / CBS 708.71 / DSM 1257 / FGSC 987)	135	mitochondrion [GO:0005739]; oxidoreductase activity [GO:0016491]			PF07955;		PTHR28071;	UPI0000189784
NCU02599	Q7SG21	Q7SG21_NEUCR	BAP31 domain-containing protein	NCU02599	Neurospora crassa (strain ATCC 24698 / 74-OR23-1A / CBS 708.71 / DSM 1257 / FGSC 987)	212	endoplasmic reticulum membrane [GO:0005789]; integral component of plasma membrane [GO:0005887]; endoplasmic reticulum to Golgi vesicle-mediated transport [GO:0006888]; intracellular protein transport [GO:0006886]; protein localization to endoplasmic reticulum exit site [GO:0070973]			PF05529;		PTHR12701;	UPI0000189788
NCU02602	Q7SG18	Q7SG18_NEUCR	Uncharacterized protein	NCU02602	Neurospora crassa (strain ATCC 24698 / 74-OR23-1A / CBS 708.71 / DSM 1257 / FGSC 987)	80				PF04419;PF12907;		PTHR33788;	UPI000018978B
NCU02604	Q7SG16	Q7SG16_NEUCR	Uncharacterized protein	NCU02604	Neurospora crassa (strain ATCC 24698 / 74-OR23-1A / CBS 708.71 / DSM 1257 / FGSC 987)	976			PS50082;PS50294;	PF00400;	SM00320;		UPI000018978D
NCU02605	Q7SG15	Q7SG15_NEUCR	DNA-directed RNA polymerase I/II/III subunit 10	NCU02605	Neurospora crassa (strain ATCC 24698 / 74-OR23-1A / CBS 708.71 / DSM 1257 / FGSC 987)	84	RNA polymerase I complex [GO:0005736]; RNA polymerase II, core complex [GO:0005665]; RNA polymerase III complex [GO:0005666]; DNA binding [GO:0003677]; DNA-directed 5'-3' RNA polymerase activity [GO:0003899]; zinc ion binding [GO:0008270]; transcription by RNA polymerase I [GO:0006360]; transcription by RNA polymerase II [GO:0006366]; transcription by RNA polymerase III [GO:0006383]		PS01112;	PF01194;		PTHR23431;	UPI000018978E
NCU02610	V5IRH6	V5IRH6_NEUCR	Dynein light chain	NCU02610	Neurospora crassa (strain ATCC 24698 / 74-OR23-1A / CBS 708.71 / DSM 1257 / FGSC 987)	103	cytoplasm [GO:0005737]; cytoplasmic dynein complex [GO:0005868]; dynein complex [GO:0030286]; microtubule [GO:0005874]; dynein intermediate chain binding [GO:0045505]; dynein light intermediate chain binding [GO:0051959]; motor activity [GO:0003774]; microtubule-based process [GO:0007017]; positive regulation of ATP-dependent microtubule motor activity, plus-end-directed [GO:2000582]		PS01239;	PF01221;	SM01375;	PTHR11886;	UPI0002372A88
NCU02614	Q7SG06	PPIH_NEUCR	Peptidyl-prolyl cis-trans isomerase H (PPIase H) (EC 5.2.1.8) (Rotamase H)	cyp-3 53H1.080 NCU02614	Neurospora crassa (strain ATCC 24698 / 74-OR23-1A / CBS 708.71 / DSM 1257 / FGSC 987)	182	nucleus [GO:0005634]; cyclosporin A binding [GO:0016018]; peptidyl-prolyl cis-trans isomerase activity [GO:0003755]; unfolded protein binding [GO:0051082]; protein refolding [GO:0042026]		PS00170;PS50072;	PF00160;		PTHR11071;	UPI0000189797
NCU02619	Q7SG01	DUS3_NEUCR	tRNA-dihydrouridine(47) synthase [NAD(P)(+)] (EC 1.3.1.89) (tRNA-dihydrouridine synthase 3)	dus-3 53H1.030 NCU02619	Neurospora crassa (strain ATCC 24698 / 74-OR23-1A / CBS 708.71 / DSM 1257 / FGSC 987)	737	cytoplasm [GO:0005737]; nucleus [GO:0005634]; flavin adenine dinucleotide binding [GO:0050660]; metal ion binding [GO:0046872]; tRNA dihydrouridine synthase activity [GO:0017150]; tRNA-dihydrouridine47 synthase activity [GO:0102265]		PS01136;	PF01207;		PTHR11082;	UPI000018979C
NCU02621	Q7SFZ9	Q7SFZ9_NEUCR	C2H2 transcription factor	NCU02621	Neurospora crassa (strain ATCC 24698 / 74-OR23-1A / CBS 708.71 / DSM 1257 / FGSC 987)	709	nucleus [GO:0005634]; nucleic acid binding [GO:0003676]		PS00028;PS50157;		SM00355;		UPI000018979E
NCU02623	Q7SFZ7	Q7SFZ7_NEUCR	Mitochondrial hypoxia responsive domain-containing protein	NCU02623	Neurospora crassa (strain ATCC 24698 / 74-OR23-1A / CBS 708.71 / DSM 1257 / FGSC 987)	241	integral component of mitochondrial inner membrane [GO:0031305]; mitochondrial respirasome [GO:0005746]; mitochondrial respiratory chain complex IV assembly [GO:0033617]		PS51503;	PF04588;		PTHR28018;	UPI00001897A0
NCU02624	Q7SDI6	Q7SDI6_NEUCR	Cytochrome P450 51	NCU02624	Neurospora crassa (strain ATCC 24698 / 74-OR23-1A / CBS 708.71 / DSM 1257 / FGSC 987)	531	endoplasmic reticulum [GO:0005783]; integral component of membrane [GO:0016021]; plasma membrane [GO:0005886]; heme binding [GO:0020037]; iron ion binding [GO:0005506]; sterol 14-demethylase activity [GO:0008398]; ergosterol biosynthetic process [GO:0006696]; oxidation-reduction process [GO:0055114]; sterol biosynthetic process [GO:0016126]; sterol metabolic process [GO:0016125]		PS00086;	PF00067;			UPI00015C3607
NCU02629	Q7SDI1	Q7SDI1_NEUCR	Bifunctional purine biosynthesis protein	ad-5 NCU02629	Neurospora crassa (strain ATCC 24698 / 74-OR23-1A / CBS 708.71 / DSM 1257 / FGSC 987)	594	IMP cyclohydrolase activity [GO:0003937]; phosphoribosylaminoimidazolecarboxamide formyltransferase activity [GO:0004643]; purine nucleotide biosynthetic process [GO:0006164]			PF01808;PF02142;	SM00798;SM00851;	PTHR11692;	UPI0000189B15
NCU02630	Q7SDI0	Q7SDI0_NEUCR	Heat shock protein 78	hsp78 NCU02630	Neurospora crassa (strain ATCC 24698 / 74-OR23-1A / CBS 708.71 / DSM 1257 / FGSC 987)	810	ATP binding [GO:0005524]		PS00870;PS00871;	PF00004;PF07724;PF10431;	SM00382;SM01086;		UPI0000189B16
NCU02634	V5IQH3	V5IQH3_NEUCR	Uncharacterized protein	NCU02634	Neurospora crassa (strain ATCC 24698 / 74-OR23-1A / CBS 708.71 / DSM 1257 / FGSC 987)	211	cytoplasm [GO:0005737]; nucleus [GO:0005634]			PF04683;		PTHR12225;	UPI0003CA5E0D
NCU02634	V5IQU7	V5IQU7_NEUCR	Uncharacterized protein	NCU02634	Neurospora crassa (strain ATCC 24698 / 74-OR23-1A / CBS 708.71 / DSM 1257 / FGSC 987)	393	cytoplasm [GO:0005737]; nucleus [GO:0005634]; proteasome regulatory particle, lid subcomplex [GO:0008541]; endopeptidase activator activity [GO:0061133]; proteasome binding [GO:0070628]; ubiquitin binding [GO:0043130]; ubiquitin-dependent protein catabolic process [GO:0006511]			PF04683;PF16550;		PTHR12225;	UPI0000189B1A
NCU02635	Q7SDH5	Q7SDH5_NEUCR	Mannan polymerase complexes MNN9 subunit	NCU02635	Neurospora crassa (strain ATCC 24698 / 74-OR23-1A / CBS 708.71 / DSM 1257 / FGSC 987)	373	alpha-1,6-mannosyltransferase complex [GO:0000136]; cis-Golgi network [GO:0005801]; alpha-1,6-mannosyltransferase activity [GO:0000009]; cell wall mannoprotein biosynthetic process [GO:0000032]; protein N-linked glycosylation [GO:0006487]						UPI0000189B1B
NCU02639	V5IP94	V5IP94_NEUCR	Argininosuccinate synthase, variant	arg-1 NCU02639	Neurospora crassa (strain ATCC 24698 / 74-OR23-1A / CBS 708.71 / DSM 1257 / FGSC 987)	333	argininosuccinate synthase activity [GO:0004055]; ATP binding [GO:0005524]; arginine biosynthetic process [GO:0006526]		PS00564;PS00565;	PF00764;		PTHR11587;	UPI0003CAAA23
NCU02639	V5IPG7	V5IPG7_NEUCR	Argininosuccinate synthase	arg-1 NCU02639	Neurospora crassa (strain ATCC 24698 / 74-OR23-1A / CBS 708.71 / DSM 1257 / FGSC 987)	417	cytoplasm [GO:0005737]; cytosol [GO:0005829]; argininosuccinate synthase activity [GO:0004055]; ATP binding [GO:0005524]; arginine biosynthetic process [GO:0006526]; argininosuccinate metabolic process [GO:0000053]; urea cycle [GO:0000050]		PS00564;PS00565;	PF00764;		PTHR11587;	UPI00021D9B0A
NCU02640	Q7SDA6	CGR1_NEUCR	rRNA-processing protein cgr-1	cgr-1 NCU02640	Neurospora crassa (strain ATCC 24698 / 74-OR23-1A / CBS 708.71 / DSM 1257 / FGSC 987)	123	nucleolus [GO:0005730]; rRNA processing [GO:0006364]			PF03879;			UPI0000189B61
NCU02644	V5IQH7	V5IQH7_NEUCR	Uncharacterized protein	NCU02644	Neurospora crassa (strain ATCC 24698 / 74-OR23-1A / CBS 708.71 / DSM 1257 / FGSC 987)	470							UPI0003CA7AB6
NCU02644	V5IQU8	V5IQU8_NEUCR	Uncharacterized protein	NCU02644	Neurospora crassa (strain ATCC 24698 / 74-OR23-1A / CBS 708.71 / DSM 1257 / FGSC 987)	736							UPI0003CA7613
NCU02650	Q7SH78	Q7SH78_NEUCR	26S proteasome non-ATPase regulatory subunit 12	rpn-5 NCU02650	Neurospora crassa (strain ATCC 24698 / 74-OR23-1A / CBS 708.71 / DSM 1257 / FGSC 987)	494	cytoplasm [GO:0005737]; nuclear proteasome complex [GO:0031595]; proteasome regulatory particle, lid subcomplex [GO:0008541]; proteasome-mediated ubiquitin-dependent protein catabolic process [GO:0043161]		PS50250;	PF01399;	SM00088;	PTHR10855;PTHR10855:SF1;	UPI00001895EC
NCU02656	Q7SH72	Q7SH72_NEUCR	Uncharacterized protein	NCU02656	Neurospora crassa (strain ATCC 24698 / 74-OR23-1A / CBS 708.71 / DSM 1257 / FGSC 987)	1005							UPI00001895F2
NCU02657	P48466	METK_NEUCR	S-adenosylmethionine synthase (AdoMet synthase) (EC 2.5.1.6) (Ethionine resistance protein 1) (Methionine adenosyltransferase) (MAT)	eth-1 B16B8.070 NCU02657	Neurospora crassa (strain ATCC 24698 / 74-OR23-1A / CBS 708.71 / DSM 1257 / FGSC 987)	395	cytosol [GO:0005829]; ATP binding [GO:0005524]; metal ion binding [GO:0046872]; methionine adenosyltransferase activity [GO:0004478]; methionine metabolic process [GO:0006555]; one-carbon metabolic process [GO:0006730]; S-adenosylmethionine biosynthetic process [GO:0006556]		PS00376;PS00377;	PF02773;PF02772;PF00438;		PTHR11964;	UPI000012EFC8
NCU02658	Q7SH71	Q7SH71_NEUCR	GPN-loop GTPase 3	NCU02658	Neurospora crassa (strain ATCC 24698 / 74-OR23-1A / CBS 708.71 / DSM 1257 / FGSC 987)	299	cell [GO:0005623]; GTP binding [GO:0005525]; GTPase activity [GO:0003924]; mitotic sister chromatid cohesion [GO:0007064]; protein import into nucleus [GO:0006606]			PF03029;		PTHR21231;PTHR21231:SF7;	UPI0000224712
NCU02659	Q7SH70	Q7SH70_NEUCR	Uncharacterized protein	NCU02659	Neurospora crassa (strain ATCC 24698 / 74-OR23-1A / CBS 708.71 / DSM 1257 / FGSC 987)	176	integral component of membrane [GO:0016021]			PF12716;			UPI00001895F4
NCU02661	Q7SH68	Q7SH68_NEUCR	DNA-directed RNA polymerase II polypeptide	NCU02661	Neurospora crassa (strain ATCC 24698 / 74-OR23-1A / CBS 708.71 / DSM 1257 / FGSC 987)	171	P-body [GO:0000932]; RNA polymerase II, core complex [GO:0005665]; DNA-directed 5'-3' RNA polymerase activity [GO:0003899]; single-stranded DNA binding [GO:0003697]; single-stranded RNA binding [GO:0003727]; translation initiation factor binding [GO:0031369]; nuclear-transcribed mRNA catabolic process, exonucleolytic [GO:0000291]; positive regulation of nuclear-transcribed mRNA poly(A) tail short…			PF00575;PF03876;			UPI0001BF7ACE
NCU02668	Q7SH61	Q7SH61_NEUCR	Cell wall synthesis protein-Penicillium chrysogenum	NCU02668	Neurospora crassa (strain ATCC 24698 / 74-OR23-1A / CBS 708.71 / DSM 1257 / FGSC 987)	445	cell surface [GO:0009986]; fungal-type cell wall [GO:0009277]; fungal-type cell wall organization [GO:0031505]			PF03856;			UPI00001895FD
NCU02669	Q7SH60	VPS10_NEUCR	Vacuolar protein sorting/targeting protein 10 (Carboxypeptidase Y receptor) (CPY receptor) (Sortilin vps10) (Vacuolar carboxypeptidase sorting receptor vps10)	vps10 B16B8.180 NCU02669	Neurospora crassa (strain ATCC 24698 / 74-OR23-1A / CBS 708.71 / DSM 1257 / FGSC 987)	1528	Golgi apparatus [GO:0005794]; integral component of membrane [GO:0016021]; late endosome membrane [GO:0031902]; protein transport [GO:0015031]			PF15902;PF15901;	SM00602;		UPI00001895FE
NCU02670	Q7SH59	Q7SH59_NEUCR	ATP binding L-PSP endoribonuclease	NCU02670	Neurospora crassa (strain ATCC 24698 / 74-OR23-1A / CBS 708.71 / DSM 1257 / FGSC 987)	956	diphthine-ammonia ligase activity [GO:0017178]; peptidyl-diphthamide biosynthetic process from peptidyl-histidine [GO:0017183]			PF01902;PF01042;		PTHR12196;	UPI0003CAE158
NCU02675	Q7SH54	Q7SH54_NEUCR	RNA-3'-phosphate cyclase	NCU02675	Neurospora crassa (strain ATCC 24698 / 74-OR23-1A / CBS 708.71 / DSM 1257 / FGSC 987)	406	nucleolus [GO:0005730]; endoribonuclease activity [GO:0004521]; ribosome biogenesis [GO:0042254]; RNA processing [GO:0006396]			PF01137;PF05189;		PTHR11096;PTHR11096:SF1;	UPI0000189604
NCU02677	Q7SH52	Q7SH52_NEUCR	Carbamoyl-phosphate synthase large subunit	arg-3 NCU02677	Neurospora crassa (strain ATCC 24698 / 74-OR23-1A / CBS 708.71 / DSM 1257 / FGSC 987)	1168	carbamoyl-phosphate synthase complex [GO:0005951]; cytoplasm [GO:0005737]; ATP binding [GO:0005524]; carbamoyl-phosphate synthase (ammonia) activity [GO:0004087]; carbamoyl-phosphate synthase (glutamine-hydrolyzing) activity [GO:0004088]; metal ion binding [GO:0046872]; 'de novo' pyrimidine nucleobase biosynthetic process [GO:0006207]; arginine biosynthetic process [GO:0006526]; carbamoyl phospha…		PS50975;PS00866;PS00867;	PF02786;PF02787;	SM01096;		UPI0000189606
NCU02681	Q7SH48	Q7SH48_NEUCR	Translocation protein	NCU02681	Neurospora crassa (strain ATCC 24698 / 74-OR23-1A / CBS 708.71 / DSM 1257 / FGSC 987)	221	integral component of membrane [GO:0016021]; Sec62/Sec63 complex [GO:0031207]; posttranslational protein targeting to membrane, translocation [GO:0031204]			PF09802;		PTHR28229;	UPI000018960A
NCU02684	Q7SH45	Q7SH45_NEUCR	PWWP domain-containing protein	crf4-3 NCU02684	Neurospora crassa (strain ATCC 24698 / 74-OR23-1A / CBS 708.71 / DSM 1257 / FGSC 987)	640			PS50812;	PF00855;	SM00293;		UPI000018960D
NCU02685	Q7SH44	Q7SH44_NEUCR	Pre-mRNA splicing helicase	NCU02685	Neurospora crassa (strain ATCC 24698 / 74-OR23-1A / CBS 708.71 / DSM 1257 / FGSC 987)	2209	catalytic step 2 spliceosome [GO:0071013]; nucleus [GO:0005634]; post-mRNA release spliceosomal complex [GO:0071014]; spliceosomal complex [GO:0005681]; U4/U6 x U5 tri-snRNP complex [GO:0046540]; U5 snRNP [GO:0005682]; ATP binding [GO:0005524]; ATP-dependent helicase activity [GO:0008026]; ATP-dependent RNA helicase activity [GO:0004004]; nucleic acid binding [GO:0003676]; mRNA splicing, via spli…		PS51192;PS51194;	PF00270;PF00271;PF02889;	SM00382;SM00487;SM00490;SM00973;		UPI000018960E
NCU02687	Q7SH42	Q7SH42_NEUCR	Activator 1 41 kDa subunit	NCU02687	Neurospora crassa (strain ATCC 24698 / 74-OR23-1A / CBS 708.71 / DSM 1257 / FGSC 987)	387	DNA replication factor C complex [GO:0005663]; Elg1 RFC-like complex [GO:0031391]; nucleus [GO:0005634]; ATP binding [GO:0005524]; chromatin binding [GO:0003682]; DNA binding [GO:0003677]; DNA strand elongation involved in DNA replication [GO:0006271]; DNA-dependent DNA replication [GO:0006261]; mitotic DNA replication checkpoint [GO:0033314]; UV-damage excision repair [GO:0070914]			PF00004;PF08542;	SM00382;		UPI0000189610
NCU02689	B2ZAG6	B2ZAG6_NEUCS	LIM and Rho-GAP domain containing protein	lrg-1 NCU02689	Neurospora crassa	1279	metal ion binding [GO:0046872]; signal transduction [GO:0007165]		PS00478;PS50023;PS50238;	PF00412;PF00620;	SM00132;SM00324;		UPI0000189612
NCU02689	Q7SH40	Q7SH40_NEUCR	LIM and Rho-GAP domain-containing protein	amyc NCU02689	Neurospora crassa (strain ATCC 24698 / 74-OR23-1A / CBS 708.71 / DSM 1257 / FGSC 987)	1279	metal ion binding [GO:0046872]; actin cortical patch localization [GO:0051666]; actin cytoskeleton organization [GO:0030036]; division septum assembly [GO:0000917]; fungal-type cell wall biogenesis [GO:0009272]; regulation of cell shape [GO:0008360]; signal transduction [GO:0007165]		PS00478;PS50023;PS50238;	PF00412;PF00620;	SM00132;SM00324;		UPI0000189612
NCU02693	Q7SH36	Q7SH36_NEUCR	C-3 sterol dehydrogenase/C-4 decarboxylase	NCU02693	Neurospora crassa (strain ATCC 24698 / 74-OR23-1A / CBS 708.71 / DSM 1257 / FGSC 987)	372	endoplasmic reticulum [GO:0005783]; 3-beta-hydroxy-delta5-steroid dehydrogenase activity [GO:0003854]; C-3 sterol dehydrogenase (C-4 sterol decarboxylase) activity [GO:0000252]; oxidoreductase activity [GO:0016491]; oxidoreductase activity, acting on the CH-OH group of donors, NAD or NADP as acceptor [GO:0016616]; ergosterol biosynthetic process [GO:0006696]			PF01073;			UPI0000189616
NCU02695	Q7SH34	Q7SH34_NEUCR	Uncharacterized protein	NCU02695	Neurospora crassa (strain ATCC 24698 / 74-OR23-1A / CBS 708.71 / DSM 1257 / FGSC 987)	324	nucleus [GO:0005634]; DNA binding [GO:0003677]		PS50118;	PF09011;	SM00398;		UPI0000189618
NCU02696	Q7SH33	PRP5_NEUCR	Pre-mRNA-processing ATP-dependent RNA helicase prp-5 (EC 3.6.4.13)	prp-5 B12J7.200 NCU02696	Neurospora crassa (strain ATCC 24698 / 74-OR23-1A / CBS 708.71 / DSM 1257 / FGSC 987)	1194	U2-type prespliceosome [GO:0071004]; ATP binding [GO:0005524]; ATPase activity [GO:0016887]; helicase activity [GO:0004386]; nucleic acid binding [GO:0003676]; U1 snRNP binding [GO:1990446]; U2 snRNP binding [GO:1990447]; U2-type prespliceosome assembly [GO:1903241]		PS00039;PS51192;PS51194;PS51195;	PF00270;PF00271;	SM00487;SM00490;		UPI0000189619
NCU02700	Q7SH29	Q7SH29_NEUCR	Uncharacterized protein	NCU02700	Neurospora crassa (strain ATCC 24698 / 74-OR23-1A / CBS 708.71 / DSM 1257 / FGSC 987)	407				PF11274;			UPI000018961D
NCU02701	Q7SH28	Q7SH28_NEUCR	Dipeptidyl peptidase 3 (EC 3.4.14.4) (Dipeptidyl aminopeptidase III) (Dipeptidyl peptidase III)	NCU02701	Neurospora crassa (strain ATCC 24698 / 74-OR23-1A / CBS 708.71 / DSM 1257 / FGSC 987)	770	cytoplasm [GO:0005737]; dipeptidyl-peptidase activity [GO:0008239]; metal ion binding [GO:0046872]; metallopeptidase activity [GO:0008237]			PF03571;		PTHR23422;	UPI0003CA1B4C
NCU02705	Q7SH24	Q7SH24_NEUCR	F1F0 ATP synthase assembly protein Atp10	NCU02705	Neurospora crassa (strain ATCC 24698 / 74-OR23-1A / CBS 708.71 / DSM 1257 / FGSC 987)	369	integral component of mitochondrial membrane [GO:0032592]; mitochondrial inner membrane [GO:0005743]; mitochondrial proton-transporting ATP synthase complex assembly [GO:0033615]			PF05176;		PTHR28106;	UPI0000189622
NCU02706	Q7SH23	Q7SH23_NEUCR	Golgi SNAP receptor complex member 1	NCU02706	Neurospora crassa (strain ATCC 24698 / 74-OR23-1A / CBS 708.71 / DSM 1257 / FGSC 987)	227	cis-Golgi network [GO:0005801]; Golgi medial cisterna [GO:0005797]; Golgi membrane [GO:0000139]; integral component of membrane [GO:0016021]; SNARE complex [GO:0031201]; SNAP receptor activity [GO:0005484]; endoplasmic reticulum to Golgi vesicle-mediated transport [GO:0006888]; protein transport [GO:0015031]; regulation of vesicle targeting, to, from or within Golgi [GO:0048209]; vesicle fusion […					PTHR21094;	UPI0000189623
NCU02707	Q7SH22	Q7SH22_NEUCR	60S ribosomal protein L6	NCU02707	Neurospora crassa (strain ATCC 24698 / 74-OR23-1A / CBS 708.71 / DSM 1257 / FGSC 987)	202	cytosolic large ribosomal subunit [GO:0022625]; RNA binding [GO:0003723]; structural constituent of ribosome [GO:0003735]; cytoplasmic translation [GO:0002181]; ribosomal large subunit assembly [GO:0000027]		PS01170;	PF01159;		PTHR10715;	UPI00015C34B6
NCU02718	V5IPA8	V5IPA8_NEUCR	Uncharacterized protein	NCU02718	Neurospora crassa (strain ATCC 24698 / 74-OR23-1A / CBS 708.71 / DSM 1257 / FGSC 987)	692							UPI0000189717
NCU02718	V5IRI4	V5IRI4_NEUCR	Uncharacterized protein	NCU02718	Neurospora crassa (strain ATCC 24698 / 74-OR23-1A / CBS 708.71 / DSM 1257 / FGSC 987)	524							UPI0003CB0347
NCU02720	Q7SGC9	Q7SGC9_NEUCR	Uncharacterized protein	NCU02720	Neurospora crassa (strain ATCC 24698 / 74-OR23-1A / CBS 708.71 / DSM 1257 / FGSC 987)	955	RNA binding [GO:0003723]		PS50961;	PF05383;	SM00684;SM00715;		UPI0003CB4171
NCU02724	V5IQI9	V5IQI9_NEUCR	HLH transcription factor, variant	NCU02724	Neurospora crassa (strain ATCC 24698 / 74-OR23-1A / CBS 708.71 / DSM 1257 / FGSC 987)	532	protein dimerization activity [GO:0046983]; regulation of transcription, DNA-templated [GO:0006355]		PS50888;	PF00010;	SM00353;	PTHR12565;	UPI000018971D
NCU02726	Q7SGC3	Q7SGC3_NEUCR	Ethanolamine kinase	NCU02726	Neurospora crassa (strain ATCC 24698 / 74-OR23-1A / CBS 708.71 / DSM 1257 / FGSC 987)	456	kinase activity [GO:0016301]						UPI000018971F
NCU02727	Q7SGC2	Q7SGC2_NEUCR	Aminomethyltransferase (EC 2.1.2.10) (Glycine cleavage system T protein)	NCU02727	Neurospora crassa (strain ATCC 24698 / 74-OR23-1A / CBS 708.71 / DSM 1257 / FGSC 987)	477	mitochondrion [GO:0005739]; aminomethyltransferase activity [GO:0004047]; glycine dehydrogenase (decarboxylating) activity [GO:0004375]; transaminase activity [GO:0008483]; glycine decarboxylation via glycine cleavage system [GO:0019464]; one-carbon metabolic process [GO:0006730]			PF01571;PF08669;			UPI0003C9F6BC
NCU02729	Q7SGC0	Q7SGC0_NEUCR	Transducin family protein	NCU02729	Neurospora crassa (strain ATCC 24698 / 74-OR23-1A / CBS 708.71 / DSM 1257 / FGSC 987)	538	nucleus [GO:0005634]		PS00678;PS50082;PS50294;	PF00400;	SM00320;		UPI0000189722
NCU02734	Q7SGB5	Q7SGB5_NEUCR	Citrate lyase beta subunit	NCU02734	Neurospora crassa (strain ATCC 24698 / 74-OR23-1A / CBS 708.71 / DSM 1257 / FGSC 987)	319	lyase activity [GO:0016829]; magnesium ion binding [GO:0000287]; oxaloacetate metabolic process [GO:0006107]			PF03328;			UPI0000189727
NCU02736	V5IPB2	V5IPB2_NEUCR	Uncharacterized protein	NCU02736	Neurospora crassa (strain ATCC 24698 / 74-OR23-1A / CBS 708.71 / DSM 1257 / FGSC 987)	196	ribonucleoprotein complex [GO:1990904]; RNA binding [GO:0003723]		PS50102;	PF00076;	SM00360;		UPI0003CAA983
NCU02736	V5IQV9	V5IQV9_NEUCR	Uncharacterized protein	NCU02736	Neurospora crassa (strain ATCC 24698 / 74-OR23-1A / CBS 708.71 / DSM 1257 / FGSC 987)	193	RNA binding [GO:0003723]		PS50102;	PF00076;	SM00360;		UPI0003CAA62A
NCU02738	V5IQJ2	V5IQJ2_NEUCR	EF hand domain-containing protein	pef-1 NCU02738	Neurospora crassa (strain ATCC 24698 / 74-OR23-1A / CBS 708.71 / DSM 1257 / FGSC 987)	311	calcium ion binding [GO:0005509]		PS00018;PS50222;	PF13202;PF13499;	SM00054;		UPI000018972B
NCU02738	V5IRI8	V5IRI8_NEUCR	EF hand domain-containing protein, variant	pef-1 NCU02738	Neurospora crassa (strain ATCC 24698 / 74-OR23-1A / CBS 708.71 / DSM 1257 / FGSC 987)	213	calcium ion binding [GO:0005509]		PS00018;PS50222;	PF13202;PF13499;	SM00054;		UPI0003CBA81B
NCU02742	Q7SGA8	Q7SGA8_NEUCR	Uncharacterized protein	NCU02742	Neurospora crassa (strain ATCC 24698 / 74-OR23-1A / CBS 708.71 / DSM 1257 / FGSC 987)	1283	nuclear pore [GO:0005643]; structural constituent of nuclear pore [GO:0017056]		PS00678;			PTHR21286;	UPI000018972E
NCU02743	Q7SGA7	Q7SGA7_NEUCR	Vacuolar protein sorting protein 26	NCU02743	Neurospora crassa (strain ATCC 24698 / 74-OR23-1A / CBS 708.71 / DSM 1257 / FGSC 987)	327	cytosol [GO:0005829]; endosome [GO:0005768]; retromer complex [GO:0030904]; retromer, cargo-selective complex [GO:0030906]; protein transporter activity [GO:0008565]; intracellular protein transport [GO:0006886]; protein retention in Golgi apparatus [GO:0045053]; retrograde transport, endosome to Golgi [GO:0042147]			PF03643;		PTHR12233;	UPI000018972F
NCU02744	Q7SGA6	Q7SGA6_NEUCR	60S ribosomal protein L9	NCU02744	Neurospora crassa (strain ATCC 24698 / 74-OR23-1A / CBS 708.71 / DSM 1257 / FGSC 987)	193	cytosolic large ribosomal subunit [GO:0022625]; rRNA binding [GO:0019843]; structural constituent of ribosome [GO:0003735]; cytoplasmic translation [GO:0002181]		PS00700;	PF00347;		PTHR11655;	UPI0000189730
NCU02746	Q7SGA4	Q7SGA4_NEUCR	V-type proton ATPase subunit H	vma-13 NCU02746	Neurospora crassa (strain ATCC 24698 / 74-OR23-1A / CBS 708.71 / DSM 1257 / FGSC 987)	481	fungal-type vacuole membrane [GO:0000329]; vacuolar proton-transporting V-type ATPase, V1 domain [GO:0000221]; proton-transporting ATPase activity, rotational mechanism [GO:0046961]; ATP hydrolysis coupled proton transport [GO:0015991]			PF11698;PF03224;		PTHR10698;	UPI0000189732
NCU02748	V5IRI9	V5IRI9_NEUCR	rRNA-processing protein utp23, variant	NCU02748	Neurospora crassa (strain ATCC 24698 / 74-OR23-1A / CBS 708.71 / DSM 1257 / FGSC 987)	320	nucleolus [GO:0005730]; small-subunit processome [GO:0032040]; small ribosomal subunit rRNA binding [GO:0070181]			PF04900;			UPI0000189734
NCU02753	Q7SCY1	Q7SCY1_NEUCR	WD repeat-containing protein	NCU02753	Neurospora crassa (strain ATCC 24698 / 74-OR23-1A / CBS 708.71 / DSM 1257 / FGSC 987)	342	THO complex part of transcription export complex [GO:0000445]; mRNA export from nucleus [GO:0006406]		PS00678;PS50082;PS50294;	PF00400;	SM00320;	PTHR22839;	UPI0003CBC72A
NCU02754	Q8TG11	CSK2C_NEUCR	Casein kinase II subunit beta-2 (CK II beta-2)	ckb-2 ckb2 NCU02754	Neurospora crassa (strain ATCC 24698 / 74-OR23-1A / CBS 708.71 / DSM 1257 / FGSC 987)	285	cytosol [GO:0005829]; Golgi membrane [GO:0000139]; protein kinase CK2 complex [GO:0005956]; RIC1-RGP1 guanyl-nucleotide exchange factor complex [GO:0034066]; protein kinase regulator activity [GO:0019887]; Rab GTPase binding [GO:0017137]; Rab guanyl-nucleotide exchange factor activity [GO:0017112]; intracellular protein transport [GO:0006886]; retrograde transport, endosome to Golgi [GO:0042147]		PS01101;	PF01214;	SM01085;	PTHR11740;	UPI000006C779
NCU02757	Q7SCX7	Q7SCX7_NEUCR	60S ribosomal protein L2	NCU02757	Neurospora crassa (strain ATCC 24698 / 74-OR23-1A / CBS 708.71 / DSM 1257 / FGSC 987)	383	mitochondrial large ribosomal subunit [GO:0005762]; RNA binding [GO:0003723]; structural constituent of ribosome [GO:0003735]; transferase activity [GO:0016740]; mitochondrial translation [GO:0032543]			PF00181;PF03947;	SM01383;SM01382;	PTHR13691;	UPI00015C36F4
NCU02765	Q7SE29	Q7SE29_NEUCR	RNA binding protein	NCU02765	Neurospora crassa (strain ATCC 24698 / 74-OR23-1A / CBS 708.71 / DSM 1257 / FGSC 987)	115				PF01172;		PTHR10927;	UPI0000189A4C
NCU02771	Q7SE23	Q7SE23_NEUCR	Uroporphyrinogen decarboxylase (EC 4.1.1.37)	NCU02771	Neurospora crassa (strain ATCC 24698 / 74-OR23-1A / CBS 708.71 / DSM 1257 / FGSC 987)	398	cytosol [GO:0005829]; uroporphyrinogen decarboxylase activity [GO:0004853]; heme biosynthetic process [GO:0006783]; protoporphyrinogen IX biosynthetic process [GO:0006782]		PS00906;PS00907;	PF01208;			UPI0003CB067F
NCU02775	Q7SE19	Q7SE19_NEUCR	Uncharacterized protein	NCU02775	Neurospora crassa (strain ATCC 24698 / 74-OR23-1A / CBS 708.71 / DSM 1257 / FGSC 987)	470	nucleus [GO:0005634]		PS51821;	PF11754;		PTHR33572;	UPI0003CB5811
NCU02780	Q7SE14	Q7SE14_NEUCR	U2 small nuclear ribonucleoprotein B	NCU02780	Neurospora crassa (strain ATCC 24698 / 74-OR23-1A / CBS 708.71 / DSM 1257 / FGSC 987)	198	U1 snRNP [GO:0005685]; snRNA stem-loop binding [GO:0035614]; U1 snRNA binding [GO:0030619]; mRNA splicing, via spliceosome [GO:0000398]		PS50102;	PF00076;	SM00360;		UPI0000189A5B
NCU02781	Q7SE13	Q7SE13_NEUCR	Actin-related protein 2/3 complex subunit	NCU02781	Neurospora crassa (strain ATCC 24698 / 74-OR23-1A / CBS 708.71 / DSM 1257 / FGSC 987)	368	actin cortical patch [GO:0030479]; Arp2/3 protein complex [GO:0005885]; actin filament binding [GO:0051015]; Arp2/3 complex-mediated actin nucleation [GO:0034314]		PS50082;PS50294;	PF00400;	SM00320;	PTHR10709;	UPI0000189A5C
NCU02784	Q7SD78	Q7SD78_NEUCR	Uncharacterized protein	NCU02784	Neurospora crassa (strain ATCC 24698 / 74-OR23-1A / CBS 708.71 / DSM 1257 / FGSC 987)	124							UPI0000189B7F
NCU02785	P80576	AROF_NEUCR	Phospho-2-dehydro-3-deoxyheptonate aldolase (EC 2.5.1.54) (3-deoxy-D-arabino-heptulosonate 7-phosphate synthase) (DAHP synthase) (Phospho-2-keto-3-deoxyheptonate aldolase)	aro-8 aroh NCU02785	Neurospora crassa (strain ATCC 24698 / 74-OR23-1A / CBS 708.71 / DSM 1257 / FGSC 987)	481	3-deoxy-7-phosphoheptulonate synthase activity [GO:0003849]; aromatic amino acid family biosynthetic process [GO:0009073]; chorismate biosynthetic process [GO:0009423]			PF01474;		PTHR21337;	UPI0000189B80
NCU02786	V5IRA9	V5IRA9_NEUCR	Glucose-6-phosphate 1-epimerase (EC 5.1.3.15)	NCU02786	Neurospora crassa (strain ATCC 24698 / 74-OR23-1A / CBS 708.71 / DSM 1257 / FGSC 987)	347	carbohydrate binding [GO:0030246]; glucose-6-phosphate 1-epimerase activity [GO:0047938]; carbohydrate metabolic process [GO:0005975]			PF01263;			UPI0000189B81
NCU02788	Q7SD74	Q7SD74_NEUCR	RIC8	ric8 NCU02788	Neurospora crassa (strain ATCC 24698 / 74-OR23-1A / CBS 708.71 / DSM 1257 / FGSC 987)	479	cytoplasm [GO:0005737]; cytosol [GO:0005829]; G-protein alpha-subunit binding [GO:0001965]; GTPase activator activity [GO:0005096]; guanyl-nucleotide exchange factor activity [GO:0005085]; G protein-coupled receptor signaling pathway [GO:0007186]			PF10165;		PTHR12425;	UPI0000189B83
NCU02794	Q7SDK1	Q7SDK1_NEUCR	Fso1	so NCU02794	Neurospora crassa (strain ATCC 24698 / 74-OR23-1A / CBS 708.71 / DSM 1257 / FGSC 987)	1304			PS01159;PS50020;	PF00397;	SM00456;		UPI0000189B01
NCU02797	Q7SEL5	Q7SEL5_NEUCR	UTP--glucose-1-phosphate uridylyltransferase (EC 2.7.7.9)	NCU02797	Neurospora crassa (strain ATCC 24698 / 74-OR23-1A / CBS 708.71 / DSM 1257 / FGSC 987)	521	cytoplasm [GO:0005737]; UTP:glucose-1-phosphate uridylyltransferase activity [GO:0003983]; glycogen metabolic process [GO:0005977]; UDP-glucose metabolic process [GO:0006011]			PF01704;			UPI00004C7A77
NCU02800	Q7SEL2	Q7SEL2_NEUCR	Arsenite resistance protein Ars2	NCU02800	Neurospora crassa (strain ATCC 24698 / 74-OR23-1A / CBS 708.71 / DSM 1257 / FGSC 987)	900	kinetochore [GO:0000776]; nucleic acid binding [GO:0003676]		PS00028;	PF04959;PF12066;PF13821;	SM01173;	PTHR21032;	UPI0003CB032F
NCU02802	Q01356	ARG13_NEUCR	Amino-acid transporter arg-13	arg-13 NCU02802	Neurospora crassa (strain ATCC 24698 / 74-OR23-1A / CBS 708.71 / DSM 1257 / FGSC 987)	363	integral component of membrane [GO:0016021]; mitochondrial inner membrane [GO:0005743]; L-ornithine transmembrane transporter activity [GO:0000064]; mitochondrial L-ornithine transmembrane transport [GO:1990575]		PS50920;	PF00153;		PTHR24089;	UPI0000125D2F
NCU02804	Q7SEK9	Q7SEK9_NEUCR	Mitochondrial 60S ribosomal protein L25	NCU02804	Neurospora crassa (strain ATCC 24698 / 74-OR23-1A / CBS 708.71 / DSM 1257 / FGSC 987)	163	mitochondrial large ribosomal subunit [GO:0005762]; structural constituent of ribosome [GO:0003735]					PTHR28041;	UPI0000189994
NCU02806	Q7RVK6	Q7RVK6_NEUCR	14-3-3 family protein 7	nfh-2 NCU02806	Neurospora crassa (strain ATCC 24698 / 74-OR23-1A / CBS 708.71 / DSM 1257 / FGSC 987)	262	protein domain specific binding [GO:0019904]		PS00796;PS00797;	PF00244;	SM00101;	PTHR18860;	UPI0000189996
NCU02807	V5IRA3	V5IRA3_NEUCR	Uncharacterized protein	NCU02807	Neurospora crassa (strain ATCC 24698 / 74-OR23-1A / CBS 708.71 / DSM 1257 / FGSC 987)	95	mitochondrion [GO:0005739]; ATPase inhibitor activity [GO:0042030]; negative regulation of ATPase activity [GO:0032780]			PF04568;			UPI00015C3589
NCU02808	Q7SEK6	Q7SEK6_NEUCR	Uncharacterized protein	NCU02808	Neurospora crassa (strain ATCC 24698 / 74-OR23-1A / CBS 708.71 / DSM 1257 / FGSC 987)	682	nuclear pore central transport channel [GO:0044613]; phospholipid binding [GO:0005543]; structural constituent of nuclear pore [GO:0017056]; protein import into nucleus [GO:0006606]			PF05064;PF13634;		PTHR12084;	UPI0000189998
NCU02809	Q7SEK5	Q7SEK5_NEUCR	Uncharacterized protein	NCU02809	Neurospora crassa (strain ATCC 24698 / 74-OR23-1A / CBS 708.71 / DSM 1257 / FGSC 987)	702				PF17104;		PTHR38698;	UPI0000189999
NCU02810	Q7SEK4	Q7SEK4_NEUCR	Eukaryotic translation initiation factor 2 gamma subunit	NCU02810	Neurospora crassa (strain ATCC 24698 / 74-OR23-1A / CBS 708.71 / DSM 1257 / FGSC 987)	511	cytoplasm [GO:0005737]; cytosol [GO:0005829]; eukaryotic 43S preinitiation complex [GO:0016282]; eukaryotic 48S preinitiation complex [GO:0033290]; eukaryotic translation initiation factor 2 complex [GO:0005850]; multi-eIF complex [GO:0043614]; GTP binding [GO:0005525]; GTPase activity [GO:0003924]; translation initiation factor activity [GO:0003743]; translation initiation factor binding [GO:003…		PS51722;	PF09173;PF00009;PF03144;			UPI000018999A
NCU02811	Q7SEK3	Q7SEK3_NEUCR	Hyphal anastamosis-8 protein	ham-8 NCU02811	Neurospora crassa (strain ATCC 24698 / 74-OR23-1A / CBS 708.71 / DSM 1257 / FGSC 987)	526	integral component of membrane [GO:0016021]						UPI000018999B
NCU02812	Q7SEK2	Q7SEK2_NEUCR	Uridylate kinase (UK) (EC 2.7.4.14) (ATP:UMP phosphotransferase) (Deoxycytidylate kinase) (CK) (dCMP kinase) (Uridine monophosphate kinase) (UMP kinase) (UMPK)	NCU02812	Neurospora crassa (strain ATCC 24698 / 74-OR23-1A / CBS 708.71 / DSM 1257 / FGSC 987)	343	cytoplasm [GO:0005737]; nucleus [GO:0005634]; ATP binding [GO:0005524]; cytidylate kinase activity [GO:0004127]; uridylate kinase activity [GO:0009041]; 'de novo' pyrimidine nucleobase biosynthetic process [GO:0006207]; pyrimidine nucleotide biosynthetic process [GO:0006221]		PS00113;			PTHR23359;	UPI0003CAFBE7
NCU02813	Q7SEK1	EIF3M_NEUCR	Eukaryotic translation initiation factor 3 subunit M (eIF3m)	NCU02813	Neurospora crassa (strain ATCC 24698 / 74-OR23-1A / CBS 708.71 / DSM 1257 / FGSC 987)	434	eukaryotic 43S preinitiation complex [GO:0016282]; eukaryotic 48S preinitiation complex [GO:0033290]; eukaryotic translation initiation factor 3 complex [GO:0005852]; eukaryotic translation initiation factor 3 complex, eIF3m [GO:0071541]; translation initiation factor activity [GO:0003743]; cytoplasmic translational initiation [GO:0002183]; formation of cytoplasmic translation initiation complex …		PS50250;	PF01399;	SM00088;		UPI000018999D
NCU02815	Q1K908	Q1K908_NEUCR	Histidine kinase	os-1 NCU02815	Neurospora crassa (strain ATCC 24698 / 74-OR23-1A / CBS 708.71 / DSM 1257 / FGSC 987)	1298	integral component of membrane [GO:0016021]; phosphorelay sensor kinase activity [GO:0000155]; protein histidine kinase activity [GO:0004673]; cellular hyperosmotic response [GO:0071474]		PS50885;PS50109;PS50110;	PF00672;PF02518;PF00512;PF00072;	SM00304;SM00387;SM00388;SM00448;		UPI000006B59A
NCU02828	Q7SCS0	Q7SCS0_NEUCR	Condensin complex component cnd2	NCU02828	Neurospora crassa (strain ATCC 24698 / 74-OR23-1A / CBS 708.71 / DSM 1257 / FGSC 987)	904	nuclear condensin complex [GO:0000799]; chromatin binding [GO:0003682]; DNA topoisomerase (ATP-hydrolyzing) activator activity [GO:0072587]; DNA topoisomerase binding [GO:0044547]; mitotic chromosome condensation [GO:0007076]			PF05786;		PTHR13108;	UPI0003CAED91
NCU02829	Q7SCR9	Q7SCR9_NEUCR	Phosphomannomutase (EC 5.4.2.8)	sec53 NCU02829	Neurospora crassa (strain ATCC 24698 / 74-OR23-1A / CBS 708.71 / DSM 1257 / FGSC 987)	273	cytosol [GO:0005829]; phosphomannomutase activity [GO:0004615]; GDP-mannose biosynthetic process [GO:0009298]; mannose metabolic process [GO:0006013]; protein N-linked glycosylation [GO:0006487]; protein targeting to ER [GO:0045047]			PF03332;		PTHR10466;	UPI00001783D1
NCU02830	Q7SCI6	Q7SCI6_NEUCR	ARF GTPase activator	NCU02830	Neurospora crassa (strain ATCC 24698 / 74-OR23-1A / CBS 708.71 / DSM 1257 / FGSC 987)	1151	endosome [GO:0005768]; trans-Golgi network [GO:0005802]; GTPase activator activity [GO:0005096]; metal ion binding [GO:0046872]; intra-Golgi vesicle-mediated transport [GO:0006891]		PS50115;PS50003;	PF01412;PF00169;	SM00105;SM00233;		UPI0003CADD15
NCU02839	Q7RV38	Q7RV38_NEUCR	T-complex protein 1 subunit delta	NCU02839	Neurospora crassa (strain ATCC 24698 / 74-OR23-1A / CBS 708.71 / DSM 1257 / FGSC 987)	533	chaperonin-containing T-complex [GO:0005832]; ATP binding [GO:0005524]; unfolded protein binding [GO:0051082]; protein folding [GO:0006457]		PS00750;PS00995;	PF00118;			UPI0000189AC8
NCU02840	Q7SDQ8	Q7SDQ8_NEUCR	26S protease regulatory subunit 7	rpt-1 NCU02840	Neurospora crassa (strain ATCC 24698 / 74-OR23-1A / CBS 708.71 / DSM 1257 / FGSC 987)	439	cytoplasm [GO:0005737]; proteasome regulatory particle, base subcomplex [GO:0008540]; ATP binding [GO:0005524]; peptidase activity [GO:0008233]; proteasome-activating ATPase activity [GO:0036402]; TBP-class protein binding [GO:0017025]; ubiquitin protein ligase binding [GO:0031625]; positive regulation of RNA polymerase II transcriptional preinitiation complex assembly [GO:0045899]; proteasome re…		PS00674;	PF00004;	SM00382;	PTHR23073:SF13;	UPI0000189AC9
NCU02887	Q7SHL7	Q7SHL7_NEUCR	Voltage-gated potassium channel beta-2 subunit	NCU02887	Neurospora crassa (strain ATCC 24698 / 74-OR23-1A / CBS 708.71 / DSM 1257 / FGSC 987)	399				PF00248;			UPI0003CA3792
NCU02888	Q7SHL6	Q7SHL6_NEUCR	Uncharacterized protein	NCU02888	Neurospora crassa (strain ATCC 24698 / 74-OR23-1A / CBS 708.71 / DSM 1257 / FGSC 987)	249				PF13417;			UPI0000189562
NCU02895	Q7SHK9	Q7SHK9_NEUCR	MutT/nudix family protein	NCU02895	Neurospora crassa (strain ATCC 24698 / 74-OR23-1A / CBS 708.71 / DSM 1257 / FGSC 987)	157	cytosol [GO:0005829]; 8-oxo-7,8-dihydrodeoxyguanosine triphosphate pyrophosphatase activity [GO:0035539]; dGTP catabolic process [GO:0006203]		PS51462;PS00893;	PF00293;			UPI0000189569
NCU02899	Q7SHK5	Q7SHK5_NEUCR	Uncharacterized protein	NCU02899	Neurospora crassa (strain ATCC 24698 / 74-OR23-1A / CBS 708.71 / DSM 1257 / FGSC 987)	525				PF10310;		PTHR28265;	UPI000018956D
NCU02901	Q7SHK3	Q7SHK3_NEUCR	Uncharacterized protein	NCU02901	Neurospora crassa (strain ATCC 24698 / 74-OR23-1A / CBS 708.71 / DSM 1257 / FGSC 987)	222							UPI0003CB3EA8
NCU02905	Q7SHJ9	Q7SHJ9_NEUCR	60S ribosomal protein L23	NCU02905	Neurospora crassa (strain ATCC 24698 / 74-OR23-1A / CBS 708.71 / DSM 1257 / FGSC 987)	139	cytosolic large ribosomal subunit [GO:0022625]; large ribosomal subunit rRNA binding [GO:0070180]; structural constituent of ribosome [GO:0003735]; translation [GO:0006412]		PS00049;	PF00238;	SM01374;	PTHR11761;	UPI0000189573
NCU02935	Q7SHG9	CG121_NEUCR	EKC/KEOPS complex subunit cgi121	cgi121 NCU02935	Neurospora crassa (strain ATCC 24698 / 74-OR23-1A / CBS 708.71 / DSM 1257 / FGSC 987)	207	chromosome, telomeric region [GO:0000781]; nucleus [GO:0005634]; tRNA processing [GO:0008033]			PF08617;		PTHR15840;	UPI0000189591
NCU02938	Q7SHG6	Q7SHG6_NEUCR	Uncharacterized protein	NCU02938	Neurospora crassa (strain ATCC 24698 / 74-OR23-1A / CBS 708.71 / DSM 1257 / FGSC 987)	139							UPI0000189594
NCU02943	Q874C1	TIM50_NEUCR	Mitochondrial import inner membrane translocase subunit tim50	tim50 NCU02943	Neurospora crassa (strain ATCC 24698 / 74-OR23-1A / CBS 708.71 / DSM 1257 / FGSC 987)	540	integral component of membrane [GO:0016021]; TIM23 mitochondrial import inner membrane translocase complex [GO:0005744]; phosphoprotein phosphatase activity [GO:0004721]; protein import into mitochondrial matrix [GO:0030150]		PS50969;	PF03031;	SM00577;	PTHR12210:SF3;	UPI0000006113
NCU02948	Q7SHF6	Q7SHF6_NEUCR	Non-anchored cell wall protein 4	ncw-4 NCU02948	Neurospora crassa (strain ATCC 24698 / 74-OR23-1A / CBS 708.71 / DSM 1257 / FGSC 987)	205	FMN binding [GO:0010181]; NAD(P)H dehydrogenase (quinone) activity [GO:0003955]; oxidation-reduction process [GO:0055114]		PS50902;	PF03358;			UPI00002246D3
NCU02951	Q7SHF3	Q7SHF3_NEUCR	40S ribosomal protein S8	NCU02951	Neurospora crassa (strain ATCC 24698 / 74-OR23-1A / CBS 708.71 / DSM 1257 / FGSC 987)	161	cytosolic small ribosomal subunit [GO:0022627]; structural constituent of ribosome [GO:0003735]; translation [GO:0006412]			PF00410;		PTHR11758;	UPI00015C36C3
NCU02952	Q7SHF2	Q7SHF2_NEUCR	Uncharacterized protein	NCU02952	Neurospora crassa (strain ATCC 24698 / 74-OR23-1A / CBS 708.71 / DSM 1257 / FGSC 987)	528							UPI00001895A2
NCU02954	Q7SH15	Q7SH15_NEUCR	Homoisocitrate dehydrogenase	lys-7 NCU02954	Neurospora crassa (strain ATCC 24698 / 74-OR23-1A / CBS 708.71 / DSM 1257 / FGSC 987)	402	magnesium ion binding [GO:0000287]; NAD binding [GO:0051287]; oxidoreductase activity, acting on the CH-OH group of donors, NAD or NADP as acceptor [GO:0016616]		PS00470;	PF00180;	SM01329;		UPI0003CA650E
NCU02955	Q7SH14	EFGM_NEUCR	Elongation factor G, mitochondrial (EF-Gmt) (Elongation factor G 1, mitochondrial) (mEF-G 1) (Elongation factor G1)	mef1 B16D18.090 NCU02955	Neurospora crassa (strain ATCC 24698 / 74-OR23-1A / CBS 708.71 / DSM 1257 / FGSC 987)	800	mitochondrion [GO:0005739]; GTP binding [GO:0005525]; GTPase activity [GO:0003924]; translation elongation factor activity [GO:0003746]; mitochondrial translational elongation [GO:0070125]		PS00301;PS51722;	PF00679;PF03764;PF00009;PF03144;	SM00838;SM00889;		UPI00002246D4
NCU02956	Q7SH13	Q7SH13_NEUCR	Aspartic proteinase	NCU02956	Neurospora crassa (strain ATCC 24698 / 74-OR23-1A / CBS 708.71 / DSM 1257 / FGSC 987)	504	extracellular region [GO:0005576]; fungal-type cell wall [GO:0009277]; integral component of membrane [GO:0016021]; aspartic-type endopeptidase activity [GO:0004190]; fungal-type cell wall organization [GO:0031505]; protein catabolic process [GO:0030163]; proteolysis [GO:0006508]		PS00141;PS51767;	PF00026;		PTHR13683;	UPI0003CB6A66
NCU02960	Q7SH09	Q7SH09_NEUCR	Peroxisomal targeting signal receptor	pex5 NCU02960	Neurospora crassa (strain ATCC 24698 / 74-OR23-1A / CBS 708.71 / DSM 1257 / FGSC 987)	637	cytosol [GO:0005829]; peroxisomal membrane [GO:0005778]; peroxisome matrix targeting signal-1 binding [GO:0005052]; protein import into peroxisome matrix, docking [GO:0016560]		PS50005;PS50293;	PF00515;	SM00028;	PTHR10130;	UPI0000189631
NCU02961	Q7SH08	Q7SH08_NEUCR	Exonuclease	NCU02961	Neurospora crassa (strain ATCC 24698 / 74-OR23-1A / CBS 708.71 / DSM 1257 / FGSC 987)	716	exonuclease activity [GO:0004527]; nucleic acid binding [GO:0003676]			PF00929;	SM00479;		UPI0000189632
NCU02962	Q7SH07	Q7SH07_NEUCR	Uncharacterized protein	NCU02962	Neurospora crassa (strain ATCC 24698 / 74-OR23-1A / CBS 708.71 / DSM 1257 / FGSC 987)	567	metal ion binding [GO:0046872]		PS50280;PS50865;	PF00856;PF01753;	SM00317;		UPI0003CA5FBB
NCU02963	Q7SH06	Q7SH06_NEUCR	C-myc binding protein	NCU02963	Neurospora crassa (strain ATCC 24698 / 74-OR23-1A / CBS 708.71 / DSM 1257 / FGSC 987)	155	cytoplasm [GO:0005737]; prefoldin complex [GO:0016272]; unfolded protein binding [GO:0051082]; protein folding [GO:0006457]			PF02996;			UPI0000189634
NCU02966	Q1K953	Q1K953_NEUCR	Pre-mRNA splicing factor prp46	NCU02966	Neurospora crassa (strain ATCC 24698 / 74-OR23-1A / CBS 708.71 / DSM 1257 / FGSC 987)	504	catalytic step 2 spliceosome [GO:0071013]; Cul4-RING E3 ubiquitin ligase complex [GO:0080008]; Prp19 complex [GO:0000974]; mRNA splicing, via spliceosome [GO:0000398]		PS00678;PS50082;PS50294;	PF00400;	SM00320;		UPI000006BD9C
NCU02967	Q1K952	Q1K952_NEUCR	Ankyrin repeat domain-containing protein	NCU02967	Neurospora crassa (strain ATCC 24698 / 74-OR23-1A / CBS 708.71 / DSM 1257 / FGSC 987)	237			PS50297;PS50088;	PF00023;PF12796;	SM00248;	PTHR44187;	UPI000006B2A6
NCU02970	Q1K950	Q1K950_NEUCR	Uncharacterized protein	NCU02970	Neurospora crassa (strain ATCC 24698 / 74-OR23-1A / CBS 708.71 / DSM 1257 / FGSC 987)	121	prefoldin complex [GO:0016272]; unfolded protein binding [GO:0051082]; protein folding [GO:0006457]			PF01920;			UPI000006BF15
NCU02972	Q1K949	Q1K949_NEUCR	Uncharacterized protein	NCU02972	Neurospora crassa (strain ATCC 24698 / 74-OR23-1A / CBS 708.71 / DSM 1257 / FGSC 987)	763							UPI000006AA79
NCU02973	Q96U08	S2538_NEUCR	Mitochondrial glycine transporter (Solute carrier family 25 member 38 homolog)	mic-13 B7F18.090 NCU02973	Neurospora crassa (strain ATCC 24698 / 74-OR23-1A / CBS 708.71 / DSM 1257 / FGSC 987)	348	integral component of membrane [GO:0016021]; mitochondrial inner membrane [GO:0005743]; mitochondrion [GO:0005739]; glycine transmembrane transporter activity [GO:0015187]; glycine import into mitochondrion [GO:1904983]		PS50920;	PF00153;		PTHR24089;	UPI000006AF71
NCU02977	F5HFU8	F5HFU8_NEUCR	DUF887 domain-containing protein	NCU02977	Neurospora crassa (strain ATCC 24698 / 74-OR23-1A / CBS 708.71 / DSM 1257 / FGSC 987)	364	integral component of membrane [GO:0016021]		PS50922;	PF03798;	SM00724;		UPI000006C17E
NCU02978	V5IR80	V5IR80_NEUCR	Cytoskeleton assembly control protein SLA1p, variant	NCU02978	Neurospora crassa (strain ATCC 24698 / 74-OR23-1A / CBS 708.71 / DSM 1257 / FGSC 987)	1143	cytoskeletal protein binding [GO:0008092]; identical protein binding [GO:0042802]; protein binding, bridging [GO:0030674]; ubiquitin binding [GO:0043130]; actin filament organization [GO:0007015]; endocytosis [GO:0006897]		PS50002;	PF00018;PF14604;PF03983;	SM00326;	PTHR11216:SF55;	UPI0003CAFD2B
NCU02978	V5IRG8	V5IRG8_NEUCR	Cytoskeleton assembly control protein SLA1p	NCU02978	Neurospora crassa (strain ATCC 24698 / 74-OR23-1A / CBS 708.71 / DSM 1257 / FGSC 987)	1168	cytoskeletal protein binding [GO:0008092]; identical protein binding [GO:0042802]; protein binding, bridging [GO:0030674]; ubiquitin binding [GO:0043130]; actin filament organization [GO:0007015]; endocytosis [GO:0006897]		PS50002;	PF00018;PF14604;PF03983;	SM00326;	PTHR11216:SF55;	UPI00015C3670
NCU02979	F5HH09	F5HH09_NEUCR	AMP deaminase	NCU02979	Neurospora crassa (strain ATCC 24698 / 74-OR23-1A / CBS 708.71 / DSM 1257 / FGSC 987)	1008	AMP deaminase activity [GO:0003876]; IMP salvage [GO:0032264]		PS00485;	PF00962;		PTHR11359;	UPI000006BB8D
NCU02982	Q1K946	Q1K946_NEUCR	26S proteasome regulatory subunit S5A	rpn-10 NCU02982	Neurospora crassa (strain ATCC 24698 / 74-OR23-1A / CBS 708.71 / DSM 1257 / FGSC 987)	303	cytosol [GO:0005829]; nucleus [GO:0005634]; proteasome regulatory particle, base subcomplex [GO:0008540]; polyubiquitin modification-dependent protein binding [GO:0031593]; proteasome assembly [GO:0043248]; proteasome-mediated ubiquitin-dependent protein catabolic process [GO:0043161]		PS50330;PS50234;	PF13519;	SM00327;	PTHR10223:SF0;	UPI000006AA26
NCU02984	Q9P3T4	DENR_NEUCR	Translation machinery-associated protein 22	tma-22 B24P7.010 NCU02984	Neurospora crassa (strain ATCC 24698 / 74-OR23-1A / CBS 708.71 / DSM 1257 / FGSC 987)	187	ribosome [GO:0005840]; mRNA binding [GO:0003729]; translation initiation factor activity [GO:0003743]; formation of translation preinitiation complex [GO:0001731]; translation reinitiation [GO:0002188]		PS50296;	PF01253;		PTHR12789;	UPI0000069ACF
NCU02994	Q1K941	Q1K941_NEUCR	Uncharacterized protein	NCU02994	Neurospora crassa (strain ATCC 24698 / 74-OR23-1A / CBS 708.71 / DSM 1257 / FGSC 987)	1437	nucleic acid binding [GO:0003676]				SM00355;		UPI0003CA7CBE
NCU02998	V5IQA5	V5IQA5_NEUCR	Nicotinate-nucleotide pyrophosphorylase [carboxylating] (EC 2.4.2.19) (Quinolinate phosphoribosyltransferase [decarboxylating])	NCU02998	Neurospora crassa (strain ATCC 24698 / 74-OR23-1A / CBS 708.71 / DSM 1257 / FGSC 987)	307	nicotinate-nucleotide diphosphorylase (carboxylating) activity [GO:0004514]; NAD biosynthetic process [GO:0009435]			PF01729;PF02749;		PTHR32179;	UPI000006C6BB
NCU02998	V5IRG7	V5IRG7_NEUCR	Nicotinate-nucleotide pyrophosphorylase [carboxylating] (EC 2.4.2.19) (Quinolinate phosphoribosyltransferase [decarboxylating])	NCU02998	Neurospora crassa (strain ATCC 24698 / 74-OR23-1A / CBS 708.71 / DSM 1257 / FGSC 987)	321	cytoplasm [GO:0005737]; nicotinate-nucleotide diphosphorylase (carboxylating) activity [GO:0004514]; NAD biosynthetic process [GO:0009435]; quinolinate catabolic process [GO:0034213]			PF01729;PF02749;		PTHR32179;	UPI0003CB6ACB
NCU03004	Q1K937	Q1K937_NEUCR	Pyruvate dehydrogenase E1 component	ace-3 NCU03004	Neurospora crassa (strain ATCC 24698 / 74-OR23-1A / CBS 708.71 / DSM 1257 / FGSC 987)	379	catalytic activity [GO:0003824]			PF02779;PF02780;	SM00861;		UPI000006B465
NCU03006	Q9P3R1	ERG6_NEUCR	Sterol 24-C-methyltransferase erg-4 (EC 2.1.1.-) (Delta(24)-sterol C-methyltransferase) (S-adenosyl-L-methionine:sterol C-24 methyl transferasee) (SAM:SMT)	erg-4 B24P7.240 NCU03006	Neurospora crassa (strain ATCC 24698 / 74-OR23-1A / CBS 708.71 / DSM 1257 / FGSC 987)	379	endoplasmic reticulum [GO:0005783]; S-adenosylmethionine-dependent methyltransferase activity [GO:0008757]; sterol 24-C-methyltransferase activity [GO:0003838]; ergosterol biosynthetic process [GO:0006696]; sterol biosynthetic process [GO:0016126]		PS51685;	PF08241;PF08498;			UPI000006A917
NCU03007	Q7RUX3	SLT11_NEUCR	Pre-mRNA-splicing factor slt-11	slt-11 B24P7.250 NCU03007	Neurospora crassa (strain ATCC 24698 / 74-OR23-1A / CBS 708.71 / DSM 1257 / FGSC 987)	385	Prp19 complex [GO:0000974]; U2-type catalytic step 1 spliceosome [GO:0071006]; U2-type catalytic step 2 spliceosome [GO:0071007]; pre-mRNA binding [GO:0036002]; U6 snRNA binding [GO:0017070]; spliceosomal snRNP assembly [GO:0000387]		PS50102;	PF00076;	SM00360;	PTHR14089;	UPI00015C360B
NCU03008	Q9P3Q9	MZM1_NEUCR	Mitochondrial zinc maintenance protein 1, mitochondrial	mzm1 B24P7.260 NCU03008	Neurospora crassa (strain ATCC 24698 / 74-OR23-1A / CBS 708.71 / DSM 1257 / FGSC 987)	111	mitochondrial matrix [GO:0005759]; protein binding involved in protein folding [GO:0044183]; mitochondrial respiratory chain complex III assembly [GO:0034551]			PF05347;			UPI000006959F
NCU03009	Q1K934	Q1K934_NEUCR	Zuotin	NCU03009	Neurospora crassa (strain ATCC 24698 / 74-OR23-1A / CBS 708.71 / DSM 1257 / FGSC 987)	445	large ribosomal subunit [GO:0015934]; nucleolus [GO:0005730]; polysomal ribosome [GO:0042788]; small ribosomal subunit [GO:0015935]; ribosome binding [GO:0043022]; 'de novo' cotranslational protein folding [GO:0051083]; cellular response to cycloheximide [GO:0071409]; negative regulation of cell death [GO:0060548]; positive regulation of transcription from RNA polymerase II promoter in response t…		PS00636;PS50076;	PF00226;PF16717;	SM00271;		UPI000006B021
NCU03010	Q1K933	Q1K933_NEUCR	L-aminoadipate-semialdehyde dehydrogenase large subunit	lys-3 NCU03010	Neurospora crassa (strain ATCC 24698 / 74-OR23-1A / CBS 708.71 / DSM 1257 / FGSC 987)	1174	L-aminoadipate-semialdehyde dehydrogenase activity [GO:0004043]; phosphopantetheine binding [GO:0031177]; lysine biosynthetic process [GO:0009085]		PS00455;PS50075;	PF00501;PF07993;PF00550;	SM00823;		UPI000006A4E6
NCU03013	V5IRR7	V5IRR7_NEUCR	Anchored cell wall protein 10, variant	acw-10 NCU03013	Neurospora crassa (strain ATCC 24698 / 74-OR23-1A / CBS 708.71 / DSM 1257 / FGSC 987)	248	cytoplasm [GO:0005737]; extracellular space [GO:0005615]; copper ion binding [GO:0005507]; superoxide dismutase activity [GO:0004784]; superoxide dismutase copper chaperone activity [GO:0016532]; zinc ion binding [GO:0008270]; removal of superoxide radicals [GO:0019430]			PF00080;		PTHR10003;	UPI0000069B58
NCU03015	V5IR74	V5IR74_NEUCR	Uncharacterized protein	NCU03015	Neurospora crassa (strain ATCC 24698 / 74-OR23-1A / CBS 708.71 / DSM 1257 / FGSC 987)	776				PF06985;			UPI0003C9FE56
NCU03018	Q7SGZ8	Q7SGZ8_NEUCR	Small nucleolar ribonucleoprotein complex subunit	NCU03018	Neurospora crassa (strain ATCC 24698 / 74-OR23-1A / CBS 708.71 / DSM 1257 / FGSC 987)	623	Pwp2p-containing subcomplex of 90S preribosome [GO:0034388]; small-subunit processome [GO:0032040]				SM00320;		UPI000018963B
NCU03020	Q7SGZ6	Q7SGZ6_NEUCR	IdgA domain-containing protein	NCU03020	Neurospora crassa (strain ATCC 24698 / 74-OR23-1A / CBS 708.71 / DSM 1257 / FGSC 987)	793	hydrolase activity, acting on glycosyl bonds [GO:0016798]			PF04227;PF00294;		PTHR42909;	UPI0003CBD710
NCU03023	Q7SGZ3	Q7SGZ3_NEUCR	Phenol 2-monooxygenase	NCU03023	Neurospora crassa (strain ATCC 24698 / 74-OR23-1A / CBS 708.71 / DSM 1257 / FGSC 987)	656	FAD binding [GO:0071949]; monooxygenase activity [GO:0004497]			PF01494;PF07976;			UPI0000189640
NCU03028	Q7SGY8	Q7SGY8_NEUCR	Deubiquitination-protection protein dph1	NCU03028	Neurospora crassa (strain ATCC 24698 / 74-OR23-1A / CBS 708.71 / DSM 1257 / FGSC 987)	431			PS50030;PS50053;	PF00627;PF00240;	SM00727;SM00165;SM00213;	PTHR10677;	UPI00002246DA
NCU03030	P12063	SYYM_NEUCR	Tyrosine--tRNA ligase, mitochondrial (EC 6.1.1.1) (Tyrosyl-tRNA synthetase) (TyrRS)	cyt-18 B18P24.070 NCU03030	Neurospora crassa (strain ATCC 24698 / 74-OR23-1A / CBS 708.71 / DSM 1257 / FGSC 987)	669	cytosol [GO:0005829]; mitochondrial matrix [GO:0005759]; mitochondrion [GO:0005739]; ATP binding [GO:0005524]; identical protein binding [GO:0042802]; RNA binding [GO:0003723]; tyrosine-tRNA ligase activity [GO:0004831]; Group I intron splicing [GO:0000372]; mRNA processing [GO:0006397]; positive regulation of RNA splicing [GO:0033120]; RNA folding [GO:0034337]; tRNA aminoacylation [GO:0043039]; …		PS00178;	PF00579;PF16714;		PTHR11766;	UPI0000136757
NCU03033	Q7SGY4	Q7SGY4_NEUCR	CCAAT-binding complex subunit HAP2	NCU03033	Neurospora crassa (strain ATCC 24698 / 74-OR23-1A / CBS 708.71 / DSM 1257 / FGSC 987)	314	DNA-binding transcription factor activity [GO:0003700]		PS51152;	PF02045;	SM00521;	PTHR12632;	UPI0000189649
NCU03035	Q7SDH3	Q7SDH3_NEUCR	Uncharacterized protein	NCU03035	Neurospora crassa (strain ATCC 24698 / 74-OR23-1A / CBS 708.71 / DSM 1257 / FGSC 987)	347							UPI0000189B1D
NCU03038	Q7SDH0	Q7SDH0_NEUCR	40S ribosomal protein S13	NCU03038	Neurospora crassa (strain ATCC 24698 / 74-OR23-1A / CBS 708.71 / DSM 1257 / FGSC 987)	151	cytosolic small ribosomal subunit [GO:0022627]; nucleolus [GO:0005730]; small ribosomal subunit rRNA binding [GO:0070181]; structural constituent of ribosome [GO:0003735]; maturation of SSU-rRNA from tricistronic rRNA transcript (SSU-rRNA, 5.8S rRNA, LSU-rRNA) [GO:0000462]; translation [GO:0006412]		PS00362;	PF08069;PF00312;	SM01386;SM01387;	PTHR11885;	UPI0000189B20
NCU03039	Q7SDG9	Q7SDG9_NEUCR	U2 snRNP auxiliary factor large subunit	NCU03039	Neurospora crassa (strain ATCC 24698 / 74-OR23-1A / CBS 708.71 / DSM 1257 / FGSC 987)	584	commitment complex [GO:0000243]; nuclear speck [GO:0016607]; U2-type prespliceosome [GO:0071004]; U2AF [GO:0089701]; poly-pyrimidine tract binding [GO:0008187]; pre-mRNA 3'-splice site binding [GO:0030628]; mRNA processing [GO:0006397]; RNA splicing [GO:0008380]		PS50102;	PF00076;	SM00360;SM00361;		UPI0000189B21
NCU03042	Q7SDG6	Q7SDG6_NEUCR	U2 snRNP component prp10	NCU03042	Neurospora crassa (strain ATCC 24698 / 74-OR23-1A / CBS 708.71 / DSM 1257 / FGSC 987)	1215	catalytic step 2 spliceosome [GO:0071013]; U2 snRNP [GO:0005686]; U2-type prespliceosome [GO:0071004]; mRNA binding [GO:0003729]; spliceosomal complex assembly [GO:0000245]			PF08920;	SM01349;	PTHR12097;	UPI0000189B24
NCU03047	Q7SD24	Q7SD24_NEUCR	Uncharacterized protein	NCU03047	Neurospora crassa (strain ATCC 24698 / 74-OR23-1A / CBS 708.71 / DSM 1257 / FGSC 987)	345	transcription factor TFIIF complex [GO:0005674]; positive regulation of transcription elongation from RNA polymerase II promoter [GO:0032968]; transcription initiation from RNA polymerase II promoter [GO:0006367]			PF02270;		PTHR10445;	UPI00015C3582
NCU03050	V5IQ94	V5IQ94_NEUCR	Arp2/3 complex 34 kDa subunit	NCU03050	Neurospora crassa (strain ATCC 24698 / 74-OR23-1A / CBS 708.71 / DSM 1257 / FGSC 987)	319	Arp2/3 protein complex [GO:0005885]; cytoplasm [GO:0005737]; actin filament binding [GO:0051015]; structural constituent of cytoskeleton [GO:0005200]; actin filament polymerization [GO:0030041]; Arp2/3 complex-mediated actin nucleation [GO:0034314]			PF04045;		PTHR12058;	UPI00015C3580
NCU03051	Q7SCL0	Q7SCL0_NEUCR	WD domain-containing protein	NCU03051	Neurospora crassa (strain ATCC 24698 / 74-OR23-1A / CBS 708.71 / DSM 1257 / FGSC 987)	964	integral component of membrane [GO:0016021]; Pwp2p-containing subcomplex of 90S preribosome [GO:0034388]; small-subunit processome [GO:0032040]; snoRNA binding [GO:0030515]		PS00678;PS50082;PS50294;	PF04003;PF00400;	SM00320;		UPI0000189C5A
NCU03060	V5IRK0	V5IRK0_NEUCR	Chromodomain helicase, variant	crf6-1 NCU03060	Neurospora crassa (strain ATCC 24698 / 74-OR23-1A / CBS 708.71 / DSM 1257 / FGSC 987)	1664	nucleus [GO:0005634]; ATP binding [GO:0005524]; helicase activity [GO:0004386]; ATP-dependent chromatin remodeling [GO:0043044]		PS50013;PS51192;PS51194;	PF00385;PF13907;PF00271;PF00176;	SM00298;SM00487;SM01176;SM00490;	PTHR10799:SF838;	UPI00015C3ACB
NCU03061	Q7SD02	Q7SD02_NEUCR	Translation initiation factor RLI1	NCU03061	Neurospora crassa (strain ATCC 24698 / 74-OR23-1A / CBS 708.71 / DSM 1257 / FGSC 987)	607	eukaryotic translation initiation factor 3 complex [GO:0005852]; nucleus [GO:0005634]; ATP binding [GO:0005524]; ATPase activity [GO:0016887]; iron ion binding [GO:0005506]; ribosomal small subunit binding [GO:0043024]; translation initiation factor activity [GO:0003743]; positive regulation of translation [GO:0045727]; ribosomal large subunit biogenesis [GO:0042273]; ribosomal subunit export fro…		PS51379;PS00211;PS50893;	PF00005;PF00037;PF04068;	SM00382;	PTHR19248;	UPI0000189BCB
NCU03062	Q7SD01	Q7SD01_NEUCR	Formin binding protein	NCU03062	Neurospora crassa (strain ATCC 24698 / 74-OR23-1A / CBS 708.71 / DSM 1257 / FGSC 987)	901	U1 snRNP [GO:0005685]; U2-type prespliceosome [GO:0071004]; RNA binding [GO:0003723]; mRNA cis splicing, via spliceosome [GO:0045292]; mRNA splicing, via spliceosome [GO:0000398]		PS51676;PS01159;PS50020;	PF01846;PF00397;	SM00441;SM00456;	PTHR11864;	UPI0000189BCC
NCU03065	Q7SCS6	Q7SCS6_NEUCR	Mitotic control protein dis3	NCU03065	Neurospora crassa (strain ATCC 24698 / 74-OR23-1A / CBS 708.71 / DSM 1257 / FGSC 987)	984	cytoplasmic exosome (RNase complex) [GO:0000177]; exosome (RNase complex) [GO:0000178]; nuclear exosome (RNase complex) [GO:0000176]; nucleolus [GO:0005730]; 3'-5'-exoribonuclease activity [GO:0000175]; endonuclease activity [GO:0004519]; endoribonuclease activity [GO:0004521]; tRNA binding [GO:0000049]; exonucleolytic trimming to generate mature 3'-end of 5.8S rRNA from tricistronic rRNA transcr…		PS01175;	PF13638;PF00773;PF17216;PF17215;	SM00670;SM00955;		UPI0003CB97FD
NCU03066	Q7SCS5	Q7SCS5_NEUCR	GTP-binding protein	NCU03066	Neurospora crassa (strain ATCC 24698 / 74-OR23-1A / CBS 708.71 / DSM 1257 / FGSC 987)	550	nucleolus [GO:0005730]; GTP binding [GO:0005525]		PS51721;	PF08701;PF01926;			UPI0000189C1A
NCU03068	Q7SCS3	Q7SCS3_NEUCR	Glycerol-3-phosphate phosphatase 1	pdx-3 NCU03068	Neurospora crassa (strain ATCC 24698 / 74-OR23-1A / CBS 708.71 / DSM 1257 / FGSC 987)	248	sugar-phosphatase activity [GO:0050308]						UPI0003CA9168
[truncated: 4,099 more rows]

## Sheet: Protein-Classes
Kinases	TFs	Transporters	Signal Transduction	Metabolism
NCU00106	NCU00017	NCU00801	NCU00018	NCU04781
NCU00108	NCU00019	NCU05853	NCU00037	NCU08755
NCU00188	NCU00038	NCU08114	NCU00043	NCU00446
[truncated: 922 more rows]

## Sheet: Protein Class_condition
	Kinases	TFs	Transporters	Signal Tranduction	Metabolism	Others	Total
[truncated: 6 more rows]
